# Supplementary material for: Single-cell RNA sequencing reveals intrahepatic and peripheral immune characteristics related to disease phases in HBV-infected patients
Source: HighWire-hosted journal article supplement (doi:10.1136/gutjnl-2021-325915), 2022-03-31
Supplement: gutjnl-2021-325915supp004_data_supplement.xlsx [file gutjnl-2021-325915supp004_data_supplement.xlsx]

## Sheet: CD8 T
p_val	avg_logFC	pct.1	pct.2	p_val_adj	cluster	gene
0	1.408	0.848	0.117	0	CD8T_c01-LEF1	SELL
0	1.37404	0.769	0.07	0	CD8T_c01-LEF1	LEF1
0	1.33835	0.68	0.117	0	CD8T_c01-LEF1	LINC02446
0	1.32992	0.764	0.09	0	CD8T_c01-LEF1	CCR7
0	1.12704	0.765	0.166	0	CD8T_c01-LEF1	TCF7
0	1.07145	0.838	0.298	0	CD8T_c01-LEF1	NOSIP
0	1.0495	0.539	0.029	0	CD8T_c01-LEF1	MAL
0	1.02632	0.973	0.591	0	CD8T_c01-LEF1	LDHB
0	1.02169	0.571	0.05	0	CD8T_c01-LEF1	AIF1
0	0.938518	1	0.976	0	CD8T_c01-LEF1	RPS3A
0	0.914079	0.998	0.883	0	CD8T_c01-LEF1	EEF1B2
0	0.880028	0.999	0.975	0	CD8T_c01-LEF1	RPS13
0	0.875761	0.453	0.022	0	CD8T_c01-LEF1	ACTN1
0	0.870969	0.529	0.069	0	CD8T_c01-LEF1	NELL2
0	0.869332	0.968	0.44	0	CD8T_c01-LEF1	TXNIP
0	0.866536	1	0.983	0	CD8T_c01-LEF1	RPL32
0	0.850487	0.998	0.917	0	CD8T_c01-LEF1	RPL22
0	0.844438	0.999	0.954	0	CD8T_c01-LEF1	RPS5
0	0.837163	1	0.984	0	CD8T_c01-LEF1	RPS8
0	0.819604	1	0.976	0	CD8T_c01-LEF1	RPS6
0	0.808541	0.986	0.807	0	CD8T_c01-LEF1	EEF1G
0	0.801122	1	0.99	0	CD8T_c01-LEF1	RPL13
0	0.799916	1	0.979	0	CD8T_c01-LEF1	RPS23
0	0.797878	1	0.988	0	CD8T_c01-LEF1	RPS12
0	0.794625	0.781	0.293	0	CD8T_c01-LEF1	RGS10
0	0.783479	0.812	0.547	0	CD8T_c01-LEF1	RPS4Y1
0	0.776375	0.999	0.98	0	CD8T_c01-LEF1	RPS18
0	0.772796	0.999	0.956	0	CD8T_c01-LEF1	RPL5
0	0.753823	0.998	0.929	0	CD8T_c01-LEF1	RPL10A
0	0.753341	1	0.98	0	CD8T_c01-LEF1	RPS14
0	0.748277	0.997	0.929	0	CD8T_c01-LEF1	RPL9
0	0.730865	0.993	0.876	0	CD8T_c01-LEF1	RPL4
0	0.724925	0.171	0.013	0	CD8T_c01-LEF1	S100B
0	0.72349	0.891	0.508	0	CD8T_c01-LEF1	EIF3E
0	0.720787	0.997	0.945	0	CD8T_c01-LEF1	RPS9
0	0.714497	0.468	0.081	0	CD8T_c01-LEF1	LDLRAP1
0	0.713645	0.999	0.977	0	CD8T_c01-LEF1	RPL18
0	0.713389	1	0.986	0	CD8T_c01-LEF1	RPL11
0	0.707292	0.999	0.971	0	CD8T_c01-LEF1	RPL14
0	0.703695	0.999	0.971	0	CD8T_c01-LEF1	RPL3
0	0.702266	0.377	0.031	0	CD8T_c01-LEF1	TRABD2A
0	0.695786	0.999	0.969	0	CD8T_c01-LEF1	RPL29
0	0.69143	1	0.987	0	CD8T_c01-LEF1	RPL19
0	0.688086	0.999	0.97	0	CD8T_c01-LEF1	RPL12
0	0.68591	0.988	0.811	0	CD8T_c01-LEF1	RPL7
0	0.68247	0.999	0.939	0	CD8T_c01-LEF1	NACA
0	0.680983	0.641	0.223	0	CD8T_c01-LEF1	PIK3IP1
0	0.671414	0.999	0.98	0	CD8T_c01-LEF1	RPL34
0	0.664683	0.999	0.972	0	CD8T_c01-LEF1	RPS25
0	0.660123	1	0.979	0	CD8T_c01-LEF1	RPL18A
0	0.654511	0.398	0.063	0	CD8T_c01-LEF1	MYC
0	0.650223	0.643	0.248	0	CD8T_c01-LEF1	FLT3LG
0	0.648149	0.998	0.943	0	CD8T_c01-LEF1	RACK1
0	0.644689	1	0.986	0	CD8T_c01-LEF1	TPT1
0	0.640266	0.998	0.954	0	CD8T_c01-LEF1	RPS16
0	0.630046	1	0.986	0	CD8T_c01-LEF1	RPL30
0	0.629783	0.279	0.009	0	CD8T_c01-LEF1	LRRN3
0	0.628694	1	0.981	0	CD8T_c01-LEF1	RPS2
0	0.623669	1	0.977	0	CD8T_c01-LEF1	RPS28
0	0.617003	0.999	0.97	0	CD8T_c01-LEF1	RPL35A
0	0.607261	0.998	0.948	0	CD8T_c01-LEF1	RPSA
0	0.606862	0.999	0.972	0	CD8T_c01-LEF1	RPLP2
0	0.604438	1	0.998	0	CD8T_c01-LEF1	EEF1A1
0	0.602409	0.999	0.975	0	CD8T_c01-LEF1	RPS4X
0	0.595315	0.305	0.033	0	CD8T_c01-LEF1	ARMH1
0	0.585719	0.999	0.972	0	CD8T_c01-LEF1	RPL37
0	0.579945	1	0.996	0	CD8T_c01-LEF1	RPL10
0	0.578361	0.716	0.358	0	CD8T_c01-LEF1	NDFIP1
0	0.577504	0.767	0.388	0	CD8T_c01-LEF1	SMDT1
0	0.575494	0.315	0.044	0	CD8T_c01-LEF1	PASK
0	0.571046	0.524	0.17	0	CD8T_c01-LEF1	OXNAD1
0	0.567869	1	0.988	0	CD8T_c01-LEF1	RPS15A
0	0.56559	0.914	0.618	0	CD8T_c01-LEF1	NOP53
0	0.561643	0.921	0.45	0	CD8T_c01-LEF1	LTB
0	0.556337	0.999	0.988	0	CD8T_c01-LEF1	RPS3
0	0.554893	1	0.988	0	CD8T_c01-LEF1	RPS27A
0	0.554366	0.999	0.956	0	CD8T_c01-LEF1	RPL36
0	0.550412	0.984	0.836	0	CD8T_c01-LEF1	NPM1
0	0.549313	0.999	0.974	0	CD8T_c01-LEF1	RPL8
0	0.547244	0.999	0.963	0	CD8T_c01-LEF1	RPLP0
0	0.544875	0.32	0.055	0	CD8T_c01-LEF1	SH3YL1
0	0.544821	0.855	0.515	0	CD8T_c01-LEF1	EIF3H
0	0.54188	0.998	0.942	0	CD8T_c01-LEF1	RPL24
0	0.53733	0.999	0.978	0	CD8T_c01-LEF1	RPL39
0	0.533925	0.309	0.041	0	CD8T_c01-LEF1	TXK
0	0.533245	0.57	0.226	0	CD8T_c01-LEF1	FOXP1
0	0.531529	0.919	0.542	0	CD8T_c01-LEF1	CD8B
0	0.528925	1	0.994	0	CD8T_c01-LEF1	RPLP1
0	0.515293	1	0.981	0	CD8T_c01-LEF1	RPS15
0	0.512519	0.293	0.03	0	CD8T_c01-LEF1	SPINT2
0	0.509894	0.999	0.956	0	CD8T_c01-LEF1	RPS21
0	0.509178	1	0.978	0	CD8T_c01-LEF1	RPL7A
0	0.506026	0.716	0.371	0	CD8T_c01-LEF1	PRMT2
0	0.498932	0.564	0.236	0	CD8T_c01-LEF1	TMEM123
0	0.496543	0.928	0.642	0	CD8T_c01-LEF1	C12orf57
0	0.494203	0.989	0.848	0	CD8T_c01-LEF1	RPL31
0	0.493041	0.996	0.953	0	CD8T_c01-LEF1	RPL21
0	0.490084	0.989	0.893	0	CD8T_c01-LEF1	RPL27
0	0.489884	0.999	0.962	0	CD8T_c01-LEF1	RPL15
0	0.489737	0.737	0.354	0	CD8T_c01-LEF1	TRAF3IP3
0	0.489627	0.374	0.097	0	CD8T_c01-LEF1	CARS
0	0.489604	0.634	0.306	0	CD8T_c01-LEF1	FBL
0	0.48806	0.788	0.477	0	CD8T_c01-LEF1	EIF3L
0	0.48477	0.293	0.055	0	CD8T_c01-LEF1	C1orf162
0	0.484176	0.518	0.208	0	CD8T_c01-LEF1	ALKBH7
0	0.478777	0.444	0.14	0	CD8T_c01-LEF1	PDE3B
0	0.478726	0.999	0.974	0	CD8T_c01-LEF1	RPL6
0	0.476661	0.743	0.405	0	CD8T_c01-LEF1	ANP32B
0	0.473116	0.989	0.867	0	CD8T_c01-LEF1	BTF3
0	0.471156	0.71	0.367	0	CD8T_c01-LEF1	SNHG8
0	0.466682	0.408	0.133	0	CD8T_c01-LEF1	C6orf48
0	0.466562	0.999	0.975	0	CD8T_c01-LEF1	RPL26
0	0.466442	0.23	0.013	0	CD8T_c01-LEF1	NT5E
0	0.466402	1	0.977	0	CD8T_c01-LEF1	RPS24
0	0.46624	0.347	0.089	0	CD8T_c01-LEF1	THEM4
0	0.465876	0.792	0.477	0	CD8T_c01-LEF1	ZFAS1
0	0.462294	0.271	0.043	0	CD8T_c01-LEF1	RIC3
0	0.455645	0.998	0.957	0	CD8T_c01-LEF1	RPL17
0	0.452358	0.242	0.023	0	CD8T_c01-LEF1	BEX3
0	0.451318	0.983	0.863	0	CD8T_c01-LEF1	RPL38
0	0.45041	0.572	0.247	0	CD8T_c01-LEF1	MCUB
0	0.447424	0.489	0.209	0	CD8T_c01-LEF1	PCED1B
0	0.447294	0.276	0.048	0	CD8T_c01-LEF1	TMEM204
0	0.443419	0.24	0.026	0	CD8T_c01-LEF1	EPHX2
0	0.442807	0.614	0.282	0	CD8T_c01-LEF1	RIPOR2
0	0.441595	0.962	0.802	0	CD8T_c01-LEF1	RPL27A
0	0.439428	0.974	0.847	0	CD8T_c01-LEF1	EEF2
0	0.43872	0.286	0.052	0	CD8T_c01-LEF1	SUSD3
0	0.433118	0.989	0.865	0	CD8T_c01-LEF1	COX4I1
0	0.429928	1	0.985	0	CD8T_c01-LEF1	RPS19
0	0.426579	0.993	0.919	0	CD8T_c01-LEF1	RPL13A
0	0.42545	0.552	0.264	0	CD8T_c01-LEF1	EIF2S3
0	0.424896	0.433	0.158	0	CD8T_c01-LEF1	RCAN3
0	0.422937	0.998	0.959	0	CD8T_c01-LEF1	RPL23A
0	0.422444	0.451	0.171	0	CD8T_c01-LEF1	AC243960.1
0	0.422084	0.995	0.934	0	CD8T_c01-LEF1	RPL37A
0	0.421105	1	0.992	0	CD8T_c01-LEF1	RPL28
0	0.419757	0.707	0.402	0	CD8T_c01-LEF1	ST13
0	0.416939	0.258	0.047	0	CD8T_c01-LEF1	ITGA6
0	0.413491	0.56	0.254	0	CD8T_c01-LEF1	GIMAP1
0	0.411307	0.308	0.08	0	CD8T_c01-LEF1	AC119396.1
0	0.410675	0.97	0.818	0	CD8T_c01-LEF1	RPS11
0	0.408305	0.989	0.883	0	CD8T_c01-LEF1	PFDN5
0	0.40594	1	0.98	0	CD8T_c01-LEF1	RPS7
0	0.403976	0.483	0.203	0	CD8T_c01-LEF1	SNHG7
0	0.397582	0.808	0.488	0	CD8T_c01-LEF1	GIMAP7
0	0.397036	0.192	0.011	0	CD8T_c01-LEF1	CD248
0	0.394084	0.762	0.479	0	CD8T_c01-LEF1	UXT
0	0.390003	0.459	0.199	0	CD8T_c01-LEF1	APEX1
0	0.389245	0.364	0.131	0	CD8T_c01-LEF1	EPB41L4A-AS1
0	0.388224	0.999	0.98	0	CD8T_c01-LEF1	MT-ND4L
0	0.385833	0.887	0.593	0	CD8T_c01-LEF1	AES
0	0.384063	0.676	0.384	0	CD8T_c01-LEF1	NSA2
0	0.383123	0.404	0.158	0	CD8T_c01-LEF1	RASGRP2
0	0.381032	0.762	0.479	0	CD8T_c01-LEF1	NME2
0	0.378265	0.886	0.642	0	CD8T_c01-LEF1	RPL23
0	0.375645	0.994	0.913	0	CD8T_c01-LEF1	EEF1D
0	0.37345	0.996	0.927	0	CD8T_c01-LEF1	RPL35
0	0.372605	0.616	0.308	0	CD8T_c01-LEF1	LINC00861
0	0.367162	0.994	0.932	0	CD8T_c01-LEF1	UBA52
0	0.36649	0.675	0.384	0	CD8T_c01-LEF1	SELENOH
0	0.366152	0.94	0.737	0	CD8T_c01-LEF1	UQCRB
0	0.359757	0.246	0.059	0	CD8T_c01-LEF1	BACH2
0	0.358044	0.166	0.004	0	CD8T_c01-LEF1	CLEC11A
0	0.355973	0.251	0.06	0	CD8T_c01-LEF1	LINC01550
0	0.355684	0.471	0.216	0	CD8T_c01-LEF1	TGFBR2
0	0.349857	0.899	0.646	0	CD8T_c01-LEF1	LIMD2
0	0.349088	0.221	0.076	0	CD8T_c01-LEF1	CISH
0	0.348058	0.999	0.98	0	CD8T_c01-LEF1	FAU
0	0.347428	0.269	0.08	0	CD8T_c01-LEF1	MHENCR
0	0.342689	0.976	0.85	0	CD8T_c01-LEF1	HNRNPA1
0	0.339746	0.275	0.084	0	CD8T_c01-LEF1	TESPA1
0	0.339379	0.659	0.377	0	CD8T_c01-LEF1	PNISR
0	0.338113	0.961	0.798	0	CD8T_c01-LEF1	COX7C
0	0.336198	0.855	0.617	0	CD8T_c01-LEF1	EIF3F
0	0.330943	0.243	0.063	0	CD8T_c01-LEF1	SERINC5
0	0.328067	0.277	0.088	0	CD8T_c01-LEF1	GABPB1-AS1
0	0.320181	0.262	0.082	0	CD8T_c01-LEF1	ILF3-DT
0	0.317749	0.548	0.298	0	CD8T_c01-LEF1	C1QBP
0	0.313701	0.562	0.288	0	CD8T_c01-LEF1	NUCB2
0	0.310757	0.133	0.015	0	CD8T_c01-LEF1	FCER1G
0	0.3098	0.899	0.696	0	CD8T_c01-LEF1	SLC25A6
0	0.309209	0.436	0.207	0	CD8T_c01-LEF1	TMEM243
0	0.307935	0.368	0.158	0	CD8T_c01-LEF1	IMPDH2
0	0.304641	0.174	0.029	0	CD8T_c01-LEF1	PDK1
0	0.304556	0.629	0.379	0	CD8T_c01-LEF1	RSL1D1
0	0.304187	0.634	0.292	0	CD8T_c01-LEF1	CD27
0	0.303865	0.999	0.987	0	CD8T_c01-LEF1	MT-CO3
0	0.302477	0.993	0.939	0	CD8T_c01-LEF1	MT-ATP8
0	0.302005	0.511	0.261	0	CD8T_c01-LEF1	ATM
0	0.299526	0.918	0.707	0	CD8T_c01-LEF1	FXYD5
0	0.297237	0.963	0.808	0	CD8T_c01-LEF1	TOMM7
0	0.295162	0.339	0.14	0	CD8T_c01-LEF1	DGKA
0	0.288716	0.731	0.488	0	CD8T_c01-LEF1	EIF4B
0	0.288355	0.469	0.245	0	CD8T_c01-LEF1	PPA1
0	0.283858	0.544	0.288	0	CD8T_c01-LEF1	RCSD1
0	0.282745	0.929	0.736	0	CD8T_c01-LEF1	COMMD6
0	0.280306	0.22	0.061	0	CD8T_c01-LEF1	BEX2
0	0.280282	0.473	0.253	0	CD8T_c01-LEF1	CHCHD10
0	0.279702	0.523	0.273	0	CD8T_c01-LEF1	CAMK4
0	0.279631	0.395	0.19	0	CD8T_c01-LEF1	CLNS1A
0	0.278868	0.23	0.07	0	CD8T_c01-LEF1	NAA16
0	0.27565	0.195	0.053	0	CD8T_c01-LEF1	RETREG1
0	0.275326	0.997	0.968	0	CD8T_c01-LEF1	MT-ND3
0	0.274722	0.905	0.715	0	CD8T_c01-LEF1	RPS20
0	0.273683	1	0.991	0	CD8T_c01-LEF1	RPS27
0	0.27335	0.559	0.3	0	CD8T_c01-LEF1	HSPB1
0	0.270754	0.242	0.076	0	CD8T_c01-LEF1	BEX4
0	0.269761	0.444	0.207	0	CD8T_c01-LEF1	ABLIM1
0	0.269548	0.278	0.109	0	CD8T_c01-LEF1	MAPKAPK5-AS1
0	0.268567	0.802	0.565	0	CD8T_c01-LEF1	GPSM3
0	0.268353	0.318	0.134	0	CD8T_c01-LEF1	GIMAP2
0	0.265809	0.205	0.058	0	CD8T_c01-LEF1	APBA2
0	0.264316	0.29	0.125	0	CD8T_c01-LEF1	RCC1
0	0.263707	0.324	0.138	0	CD8T_c01-LEF1	IL6ST
0	0.262028	0.223	0.073	0	CD8T_c01-LEF1	LINC02273
0	0.261954	0.114	0.002	0	CD8T_c01-LEF1	NOG
0	0.260676	0.225	0.077	0	CD8T_c01-LEF1	MAML2
0	0.260521	0.416	0.214	0	CD8T_c01-LEF1	LSM5
0	0.257822	0.999	0.979	0	CD8T_c01-LEF1	MT-CYB
0	0.257735	0.116	0.008	0	CD8T_c01-LEF1	CD79A
0	0.257113	0.124	0.016	0	CD8T_c01-LEF1	PCSK1N
0	0.256674	0.208	0.068	0	CD8T_c01-LEF1	ZNF101
0	0.256162	0.403	0.208	0	CD8T_c01-LEF1	OXA1L
0	0.255422	0.698	0.443	0	CD8T_c01-LEF1	CCND3
0	0.251759	0.99	0.873	0	CD8T_c01-LEF1	PABPC1
0	0.25088	0.978	0.87	0	CD8T_c01-LEF1	MT-ND4
2.62e-307	0.261892	0.824	0.6	4.02e-303	CD8T_c01-LEF1	RPS17
5.6e-257	0.285878	0.899	0.722	8.6e-253	CD8T_c01-LEF1	RPL36A
0	0.907016	0.946	0.475	0	CD8T_c02-SELL	TXNIP
0	0.732622	0.513	0.182	0	CD8T_c02-SELL	SELL
0	0.643891	0.546	0.216	0	CD8T_c02-SELL	TCF7
0	0.546107	0.808	0.487	0	CD8T_c02-SELL	LTB
0	0.524399	0.869	0.463	0	CD8T_c02-SELL	IL7R
0	0.493122	0.847	0.622	0	CD8T_c02-SELL	LDHB
0	0.484385	0.997	0.981	0	CD8T_c02-SELL	RPS18
0	0.460735	0.995	0.973	0	CD8T_c02-SELL	RPL3
0	0.452442	0.999	0.991	0	CD8T_c02-SELL	RPL13
0	0.443272	0.577	0.306	0	CD8T_c02-SELL	RIPOR2
0	0.437466	0.966	0.885	0	CD8T_c02-SELL	RPL4
0	0.417678	0.983	0.943	0	CD8T_c02-SELL	MT-ND1
0	0.414179	0.995	0.977	0	CD8T_c02-SELL	RPS6
0	0.397034	0.831	0.507	0	CD8T_c02-SELL	KLF2
0	0.395822	0.928	0.814	0	CD8T_c02-SELL	RPL27A
0	0.393238	0.157	0.024	0	CD8T_c02-SELL	IFNG-AS1
0	0.387012	0.997	0.982	0	CD8T_c02-SELL	RPS14
0	0.386624	0.986	0.934	0	CD8T_c02-SELL	RPL10A
0	0.380837	0.145	0.017	0	CD8T_c02-SELL	CRIP2
0	0.380824	0.999	0.989	0	CD8T_c02-SELL	RPS12
0	0.378239	0.993	0.959	0	CD8T_c02-SELL	RPL5
0	0.377375	0.991	0.952	0	CD8T_c02-SELL	RPSA
0	0.373937	0.996	0.974	0	CD8T_c02-SELL	RPS25
0	0.368008	0.997	0.976	0	CD8T_c02-SELL	RPL8
0	0.366257	0.997	0.98	0	CD8T_c02-SELL	RPL18A
0	0.360395	0.997	0.973	0	CD8T_c02-SELL	RPL14
0	0.355096	0.981	0.925	0	CD8T_c02-SELL	RPL13A
0	0.354448	0.998	0.98	0	CD8T_c02-SELL	RPS23
0	0.352364	0.999	0.988	0	CD8T_c02-SELL	RPS3
0	0.352266	1	0.998	0	CD8T_c02-SELL	EEF1A1
0	0.349718	0.999	0.988	0	CD8T_c02-SELL	RPL19
0	0.347556	0.998	0.985	0	CD8T_c02-SELL	RPS8
0	0.343485	0.999	0.984	0	CD8T_c02-SELL	RPL32
0	0.339355	0.992	0.959	0	CD8T_c02-SELL	RPL36
0	0.336187	0.994	0.962	0	CD8T_c02-SELL	RPL23A
0	0.33549	0.989	0.947	0	CD8T_c02-SELL	RACK1
0	0.334719	0.999	0.987	0	CD8T_c02-SELL	RPL11
0	0.330967	0.995	0.965	0	CD8T_c02-SELL	RPLP0
0	0.330615	0.997	0.982	0	CD8T_c02-SELL	MT-ND4L
0	0.329049	0.985	0.934	0	CD8T_c02-SELL	RPL9
0	0.328493	0.997	0.978	0	CD8T_c02-SELL	RPS3A
0	0.325839	0.998	0.98	0	CD8T_c02-SELL	MT-CYB
0	0.32342	0.118	0.018	0	CD8T_c02-SELL	FXYD2
0	0.322978	0.977	0.892	0	CD8T_c02-SELL	EEF1B2
0	0.318419	0.996	0.978	0	CD8T_c02-SELL	RPL18
0	0.318239	0.998	0.974	0	CD8T_c02-SELL	RPLP2
0	0.314297	0.992	0.958	0	CD8T_c02-SELL	RPS16
0	0.313019	0.996	0.977	0	CD8T_c02-SELL	RPS4X
0	0.309989	0.987	0.949	0	CD8T_c02-SELL	RPS9
0	0.309679	0.998	0.987	0	CD8T_c02-SELL	RPL30
0	0.308313	0.993	0.96	0	CD8T_c02-SELL	RPL17
0	0.30727	0.995	0.971	0	CD8T_c02-SELL	RPL29
0	0.304753	0.998	0.988	0	CD8T_c02-SELL	RPS15A
0	0.304738	0.987	0.923	0	CD8T_c02-SELL	RPL22
0	0.30466	0.995	0.975	0	CD8T_c02-SELL	RPL6
0	0.30314	0.985	0.932	0	CD8T_c02-SELL	RPL35
0	0.301103	0.997	0.987	0	CD8T_c02-SELL	TPT1
0	0.299945	0.996	0.977	0	CD8T_c02-SELL	RPL26
0	0.296642	0.996	0.98	0	CD8T_c02-SELL	RPL7A
0	0.294268	0.998	0.981	0	CD8T_c02-SELL	RPS7
0	0.293222	0.998	0.989	0	CD8T_c02-SELL	RPS27A
0	0.291502	0.995	0.957	0	CD8T_c02-SELL	RPS5
0	0.289018	0.997	0.982	0	CD8T_c02-SELL	RPS15
0	0.284931	0.998	0.982	0	CD8T_c02-SELL	RPL34
0	0.283785	0.997	0.979	0	CD8T_c02-SELL	RPS28
0	0.275322	1	0.996	0	CD8T_c02-SELL	RPL10
0	0.271401	0.996	0.982	0	CD8T_c02-SELL	RPS2
0	0.269505	0.997	0.976	0	CD8T_c02-SELL	RPS13
0	0.267373	0.99	0.965	0	CD8T_c02-SELL	RPL15
0	0.264643	0.996	0.972	0	CD8T_c02-SELL	RPL35A
0	0.254117	0.995	0.972	0	CD8T_c02-SELL	RPL12
2.01e-293	0.301637	0.145	0.034	3.09e-289	CD8T_c02-SELL	FXYD7
2.41e-289	0.42323	0.874	0.723	3.71e-285	CD8T_c02-SELL	FXYD5
2.36e-287	0.274331	0.998	0.988	3.63e-283	CD8T_c02-SELL	MT-CO3
4.86e-284	0.421499	0.522	0.27	7.46e-280	CD8T_c02-SELL	MCUB
6.5e-283	0.257116	0.988	0.946	9.99e-279	CD8T_c02-SELL	RPL24
1.17e-282	0.255094	0.122	0.026	1.79e-278	CD8T_c02-SELL	NPDC1
1.1e-271	0.252487	0.987	0.943	1.68e-267	CD8T_c02-SELL	NACA
4.49e-266	0.362552	0.265	0.097	6.89e-262	CD8T_c02-SELL	TIMP1
3.06e-260	0.354806	0.338	0.138	4.7e-256	CD8T_c02-SELL	LEF1
7.61e-245	0.354269	0.298	0.121	1.17e-240	CD8T_c02-SELL	TRADD
1.17e-244	0.27764	0.966	0.901	1.79e-240	CD8T_c02-SELL	RPL27
1.45e-240	0.306798	0.931	0.821	2.23e-236	CD8T_c02-SELL	EEF1G
2.28e-237	0.33242	0.257	0.098	3.49e-233	CD8T_c02-SELL	AC119396.1
6.61e-236	0.315881	0.229	0.082	1.01e-231	CD8T_c02-SELL	LINC02273
1.17e-235	0.370354	0.826	0.642	1.8e-231	CD8T_c02-SELL	NOP53
1.54e-232	0.314784	0.207	0.071	2.37e-228	CD8T_c02-SELL	NSG1
6.58e-223	0.336848	0.276	0.112	1.01e-218	CD8T_c02-SELL	NELL2
2.98e-219	0.437171	0.472	0.26	4.58e-215	CD8T_c02-SELL	LYAR
1.05e-218	0.459823	0.497	0.278	1.61e-214	CD8T_c02-SELL	CLDND1
2.04e-215	0.360119	0.627	0.385	3.13e-211	CD8T_c02-SELL	TRAF3IP3
6.03e-214	0.254915	0.966	0.891	9.26e-210	CD8T_c02-SELL	PFDN5
2.56e-213	0.395929	0.558	0.337	3.93e-209	CD8T_c02-SELL	ARHGAP15
3.26e-209	0.327743	0.275	0.116	5e-205	CD8T_c02-SELL	LDLRAP1
2.47e-205	0.318757	0.345	0.16	3.79e-201	CD8T_c02-SELL	S1PR1
2.65e-200	0.377619	0.492	0.282	4.06e-196	CD8T_c02-SELL	FLT3LG
1.47e-198	0.348164	0.531	0.305	2.26e-194	CD8T_c02-SELL	RCSD1
7.02e-195	0.273688	0.981	0.932	1.08e-190	CD8T_c02-SELL	MT-ND5
1.45e-194	0.318599	0.817	0.615	2.23e-190	CD8T_c02-SELL	AES
1.83e-191	0.26468	0.942	0.825	2.82e-187	CD8T_c02-SELL	RPL7
1.38e-185	0.264562	0.194	0.072	2.12e-181	CD8T_c02-SELL	SUSD3
2.26e-174	0.256668	0.984	0.943	3.46e-170	CD8T_c02-SELL	MT-ATP8
6.5e-172	0.255365	0.938	0.818	9.98e-168	CD8T_c02-SELL	CD52
5.61e-171	0.337472	0.586	0.38	8.62e-167	CD8T_c02-SELL	GTF3A
9.32e-170	0.334254	0.64	0.422	1.43e-165	CD8T_c02-SELL	GIMAP4
2.73e-166	0.327182	0.701	0.5	4.19e-162	CD8T_c02-SELL	NME2
1.45e-165	0.263685	0.936	0.857	2.22e-161	CD8T_c02-SELL	EEF2
4.7e-162	0.286997	0.337	0.169	7.21e-158	CD8T_c02-SELL	CXCR3
7.87e-158	0.291638	0.191	0.076	1.21e-153	CD8T_c02-SELL	C1orf162
2.36e-153	0.317634	0.621	0.421	3.63e-149	CD8T_c02-SELL	SMDT1
7.94e-150	0.299671	0.448	0.264	1.22e-145	CD8T_c02-SELL	TMEM123
1.58e-147	0.265588	0.217	0.095	2.42e-143	CD8T_c02-SELL	MHENCR
1.98e-142	0.348233	0.697	0.57	3.04e-138	CD8T_c02-SELL	RPS4Y1
2.79e-141	0.280427	0.722	0.514	4.29e-137	CD8T_c02-SELL	GIMAP7
3.45e-139	0.373627	0.528	0.35	5.3e-135	CD8T_c02-SELL	NOSIP
6.97e-139	0.299259	0.734	0.57	1.07e-134	CD8T_c02-SELL	GSTK1
1.44e-136	0.269115	0.86	0.703	2.21e-132	CD8T_c02-SELL	S100A10
8.14e-134	0.272898	0.595	0.399	1.25e-129	CD8T_c02-SELL	PNISR
9.48e-134	0.293462	0.46	0.279	1.46e-129	CD8T_c02-SELL	GIMAP1
1.36e-129	0.269242	0.327	0.176	2.1e-125	CD8T_c02-SELL	CDC25B
1.32e-122	0.252529	0.75	0.583	2.02e-118	CD8T_c02-SELL	GPSM3
9.07e-119	0.261911	0.311	0.171	1.39e-114	CD8T_c02-SELL	SORL1
8.42e-118	0.281413	0.646	0.451	1.29e-113	CD8T_c02-SELL	AHNAK
1.1e-116	0.25181	0.715	0.543	1.69e-112	CD8T_c02-SELL	EIF3E
1.3e-115	0.261194	0.345	0.197	2e-111	CD8T_c02-SELL	RNF126
2.67e-110	0.256175	0.49	0.322	4.09e-106	CD8T_c02-SELL	LIME1
5.1e-105	0.25125	0.668	0.504	7.82e-101	CD8T_c02-SELL	EIF3L
5.79e-90	0.329268	0.654	0.534	8.88e-86	CD8T_c02-SELL	GZMK
3.28e-67	0.307925	0.377	0.26	5.04e-63	CD8T_c02-SELL	CMC1
0	2.86018	0.772	0.071	0	CD8T_c03-CX3CR1	GNLY
0	2.34995	0.815	0.034	0	CD8T_c03-CX3CR1	FGFBP2
0	1.89062	0.857	0.125	0	CD8T_c03-CX3CR1	GZMB
0	1.63069	0.955	0.308	0	CD8T_c03-CX3CR1	GZMH
0	1.42023	0.566	0.05	0	CD8T_c03-CX3CR1	FCGR3A
0	1.37816	0.525	0.02	0	CD8T_c03-CX3CR1	CX3CR1
0	1.36112	0.691	0.194	0	CD8T_c03-CX3CR1	LGALS1
0	1.34633	0.995	0.762	0	CD8T_c03-CX3CR1	NKG7
0	1.14871	0.484	0.032	0	CD8T_c03-CX3CR1	ADGRG1
0	1.1428	0.436	0.01	0	CD8T_c03-CX3CR1	PRSS23
0	1.12898	0.472	0.088	0	CD8T_c03-CX3CR1	SPON2
0	1.06206	0.744	0.288	0	CD8T_c03-CX3CR1	EFHD2
0	1.04014	0.895	0.459	0	CD8T_c03-CX3CR1	PRF1
0	0.999255	0.612	0.171	0	CD8T_c03-CX3CR1	PLEK
0	0.982155	0.674	0.216	0	CD8T_c03-CX3CR1	KLRD1
0	0.945178	0.588	0.199	0	CD8T_c03-CX3CR1	ITGB1
0	0.921767	0.283	0.028	0	CD8T_c03-CX3CR1	ZNF683
0	0.913865	0.964	0.792	0	CD8T_c03-CX3CR1	CD52
0	0.884115	0.661	0.249	0	CD8T_c03-CX3CR1	C12orf75
0	0.832246	0.279	0.021	0	CD8T_c03-CX3CR1	LAIR2
0	0.77281	0.341	0.036	0	CD8T_c03-CX3CR1	C1orf21
0	0.77251	0.805	0.426	0	CD8T_c03-CX3CR1	TXNIP
0	0.757411	0.979	0.839	0	CD8T_c03-CX3CR1	S100A4
0	0.752414	0.445	0.111	0	CD8T_c03-CX3CR1	S1PR5
0	0.751138	0.986	0.925	0	CD8T_c03-CX3CR1	SH3BGRL3
0	0.74783	0.318	0.037	0	CD8T_c03-CX3CR1	TTC38
0	0.738696	0.731	0.416	0	CD8T_c03-CX3CR1	FLNA
0	0.73518	0.928	0.764	0	CD8T_c03-CX3CR1	IFITM2
0	0.721491	0.884	0.604	0	CD8T_c03-CX3CR1	EMP3
0	0.713144	0.313	0.037	0	CD8T_c03-CX3CR1	FGR
0	0.704026	0.464	0.143	0	CD8T_c03-CX3CR1	TBX21
0	0.700558	0.234	0.006	0	CD8T_c03-CX3CR1	ASCL2
0	0.684874	0.406	0.098	0	CD8T_c03-CX3CR1	FCRL6
0	0.631676	0.843	0.603	0	CD8T_c03-CX3CR1	CTSW
0	0.620953	0.881	0.654	0	CD8T_c03-CX3CR1	ITGB2
0	0.617178	0.528	0.244	0	CD8T_c03-CX3CR1	HOPX
0	0.614706	0.458	0.205	0	CD8T_c03-CX3CR1	DSTN
0	0.611524	0.822	0.453	0	CD8T_c03-CX3CR1	KLF2
0	0.61047	0.365	0.115	0	CD8T_c03-CX3CR1	TGFBR3
0	0.599225	0.434	0.197	0	CD8T_c03-CX3CR1	SYNE1
0	0.59731	0.46	0.191	0	CD8T_c03-CX3CR1	TPST2
0	0.589857	0.676	0.411	0	CD8T_c03-CX3CR1	AHNAK
0	0.58262	0.468	0.209	0	CD8T_c03-CX3CR1	MYO1G
0	0.581021	0.785	0.548	0	CD8T_c03-CX3CR1	RAP1B
0	0.571286	0.706	0.457	0	CD8T_c03-CX3CR1	SLC9A3R1
0	0.5703	0.626	0.368	0	CD8T_c03-CX3CR1	BIN2
0	0.560357	0.406	0.156	0	CD8T_c03-CX3CR1	MYO1F
0	0.551872	0.392	0.177	0	CD8T_c03-CX3CR1	PLAC8
0	0.551012	0.473	0.213	0	CD8T_c03-CX3CR1	SAMD3
0	0.549686	0.351	0.127	0	CD8T_c03-CX3CR1	S1PR1
0	0.546487	0.944	0.812	0	CD8T_c03-CX3CR1	S100A6
0	0.541103	0.335	0.128	0	CD8T_c03-CX3CR1	CLIC3
0	0.53763	0.32	0.105	0	CD8T_c03-CX3CR1	PXN
0	0.53616	0.696	0.457	0	CD8T_c03-CX3CR1	UCP2
0	0.524717	0.923	0.737	0	CD8T_c03-CX3CR1	CD99
0	0.520123	0.521	0.243	0	CD8T_c03-CX3CR1	ZEB2
0	0.512223	0.303	0.092	0	CD8T_c03-CX3CR1	ADRB2
0	0.50932	0.235	0.057	0	CD8T_c03-CX3CR1	CEP78
0	0.49495	0.87	0.673	0	CD8T_c03-CX3CR1	S100A10
0	0.482915	0.542	0.303	0	CD8T_c03-CX3CR1	KLRG1
0	0.478854	0.643	0.431	0	CD8T_c03-CX3CR1	CCND3
0	0.471508	0.186	0.027	0	CD8T_c03-CX3CR1	VCL
0	0.470322	0.461	0.232	0	CD8T_c03-CX3CR1	DOK2
0	0.469782	0.268	0.085	0	CD8T_c03-CX3CR1	SH3BP5
0	0.466245	0.336	0.148	0	CD8T_c03-CX3CR1	CDC25B
0	0.4595	0.367	0.185	0	CD8T_c03-CX3CR1	STK38
0	0.457201	0.784	0.59	0	CD8T_c03-CX3CR1	CD3G
0	0.445289	0.156	0.007	0	CD8T_c03-CX3CR1	LILRB1
0	0.442587	0.37	0.179	0	CD8T_c03-CX3CR1	RASSF1
0	0.439647	0.617	0.389	0	CD8T_c03-CX3CR1	GIMAP4
0	0.438904	0.788	0.587	0	CD8T_c03-CX3CR1	AES
0	0.435652	0.356	0.182	0	CD8T_c03-CX3CR1	KLF3
0	0.434135	0.713	0.511	0	CD8T_c03-CX3CR1	PPP1CA
0	0.433645	0.493	0.295	0	CD8T_c03-CX3CR1	SPN
0	0.43316	0.474	0.279	0	CD8T_c03-CX3CR1	ABHD17A
0	0.430898	0.634	0.441	0	CD8T_c03-CX3CR1	CD247
0	0.426459	0.878	0.647	0	CD8T_c03-CX3CR1	LITAF
0	0.425287	0.522	0.316	0	CD8T_c03-CX3CR1	PPP1R18
0	0.423857	0.265	0.1	0	CD8T_c03-CX3CR1	RPS6KA1
0	0.422881	0.515	0.318	0	CD8T_c03-CX3CR1	SELPLG
0	0.420818	0.507	0.318	0	CD8T_c03-CX3CR1	SYNE2
0	0.418127	0.361	0.18	0	CD8T_c03-CX3CR1	PPP3CC
0	0.417192	0.973	0.765	0	CD8T_c03-CX3CR1	CST7
0	0.415835	0.653	0.458	0	CD8T_c03-CX3CR1	ANXA6
0	0.415698	0.454	0.269	0	CD8T_c03-CX3CR1	SCP2
0	0.415292	0.16	0.038	0	CD8T_c03-CX3CR1	KLRF1
0	0.415155	0.415	0.2	0	CD8T_c03-CX3CR1	PYHIN1
0	0.413405	0.928	0.812	0	CD8T_c03-CX3CR1	ARPC2
0	0.411136	0.437	0.253	0	CD8T_c03-CX3CR1	CAPN2
0	0.410523	0.367	0.197	0	CD8T_c03-CX3CR1	PRKCB
0	0.410505	0.981	0.937	0	CD8T_c03-CX3CR1	IFITM1
0	0.401644	0.664	0.447	0	CD8T_c03-CX3CR1	S100A11
0	0.401281	0.354	0.177	0	CD8T_c03-CX3CR1	RAB29
0	0.401022	0.149	0.011	0	CD8T_c03-CX3CR1	ITGAM
0	0.400523	0.992	0.974	0	CD8T_c03-CX3CR1	TMSB10
0	0.399768	0.958	0.882	0	CD8T_c03-CX3CR1	MYL12A
0	0.398648	0.502	0.297	0	CD8T_c03-CX3CR1	ANXA2
0	0.398458	0.545	0.344	0	CD8T_c03-CX3CR1	MBP
0	0.396882	0.21	0.067	0	CD8T_c03-CX3CR1	CD300A
0	0.395224	0.314	0.161	0	CD8T_c03-CX3CR1	RASA3
0	0.395083	0.989	0.973	0	CD8T_c03-CX3CR1	PFN1
0	0.394842	0.246	0.095	0	CD8T_c03-CX3CR1	PTPN18
0	0.390989	0.228	0.095	0	CD8T_c03-CX3CR1	CD320
0	0.390594	0.47	0.284	0	CD8T_c03-CX3CR1	RIPOR2
0	0.390257	0.709	0.554	0	CD8T_c03-CX3CR1	LY6E
0	0.389961	0.197	0.062	0	CD8T_c03-CX3CR1	PATL2
0	0.38886	0.468	0.297	0	CD8T_c03-CX3CR1	NDUFB7
0	0.386305	0.353	0.178	0	CD8T_c03-CX3CR1	AC116366.3
0	0.385198	0.606	0.423	0	CD8T_c03-CX3CR1	SUN2
0	0.384716	0.659	0.481	0	CD8T_c03-CX3CR1	PTP4A2
0	0.382792	0.402	0.225	0	CD8T_c03-CX3CR1	SSBP4
0	0.381963	0.14	0.013	0	CD8T_c03-CX3CR1	LINC02384
0	0.381689	0.995	0.811	0	CD8T_c03-CX3CR1	CCL5
0	0.380319	0.144	0.016	0	CD8T_c03-CX3CR1	RAP1GAP2
0	0.373126	0.769	0.508	0	CD8T_c03-CX3CR1	HLA-DPB1
0	0.371924	0.23	0.095	0	CD8T_c03-CX3CR1	TRG-AS1
0	0.365293	0.139	0.015	0	CD8T_c03-CX3CR1	TSPAN2
0	0.365213	0.148	0.026	0	CD8T_c03-CX3CR1	MTSS1
0	0.363825	0.866	0.719	0	CD8T_c03-CX3CR1	LSP1
0	0.363246	0.426	0.224	0	CD8T_c03-CX3CR1	CHST12
0	0.36323	0.425	0.262	0	CD8T_c03-CX3CR1	ARRB2
0	0.362683	0.311	0.14	0	CD8T_c03-CX3CR1	PLEKHF1
0	0.361809	0.432	0.254	0	CD8T_c03-CX3CR1	ARPC5L
0	0.357803	0.852	0.697	0	CD8T_c03-CX3CR1	CLIC1
0	0.356545	0.454	0.274	0	CD8T_c03-CX3CR1	MATK
0	0.355526	0.61	0.432	0	CD8T_c03-CX3CR1	YWHAQ
0	0.353957	0.413	0.259	0	CD8T_c03-CX3CR1	ADD3
0	0.351046	0.415	0.257	0	CD8T_c03-CX3CR1	ITGB7
0	0.351009	0.24	0.106	0	CD8T_c03-CX3CR1	PTGER2
0	0.350972	0.283	0.142	0	CD8T_c03-CX3CR1	RGS19
0	0.346627	0.562	0.401	0	CD8T_c03-CX3CR1	ARPC5
0	0.34516	0.286	0.144	0	CD8T_c03-CX3CR1	GLIPR2
0	0.34323	0.241	0.114	0	CD8T_c03-CX3CR1	GNPTAB
0	0.342297	0.404	0.235	0	CD8T_c03-CX3CR1	SASH3
0	0.341685	0.652	0.458	0	CD8T_c03-CX3CR1	CTSC
0	0.337937	0.333	0.196	0	CD8T_c03-CX3CR1	CCDC88C
0	0.337504	0.341	0.194	0	CD8T_c03-CX3CR1	PTPN4
0	0.337373	0.969	0.933	0	CD8T_c03-CX3CR1	CFL1
0	0.337032	0.999	0.997	0	CD8T_c03-CX3CR1	ACTB
0	0.335912	0.157	0.065	0	CD8T_c03-CX3CR1	KLRC3
0	0.335461	0.351	0.198	0	CD8T_c03-CX3CR1	MIEN1
0	0.332243	0.266	0.137	0	CD8T_c03-CX3CR1	CDKN2D
0	0.329755	0.957	0.894	0	CD8T_c03-CX3CR1	CYBA
0	0.329321	0.691	0.485	0	CD8T_c03-CX3CR1	GIMAP7
0	0.329317	0.451	0.29	0	CD8T_c03-CX3CR1	BTN3A2
0	0.32715	0.634	0.474	0	CD8T_c03-CX3CR1	PAXX
0	0.325005	0.536	0.364	0	CD8T_c03-CX3CR1	TRAF3IP3
0	0.323309	0.154	0.042	0	CD8T_c03-CX3CR1	GK5
0	0.322641	0.15	0.051	0	CD8T_c03-CX3CR1	SYNGR1
0	0.320587	0.287	0.162	0	CD8T_c03-CX3CR1	RASGRP2
0	0.319473	0.881	0.761	0	CD8T_c03-CX3CR1	MYL12B
0	0.319206	0.212	0.095	0	CD8T_c03-CX3CR1	TSPAN32
0	0.317927	0.539	0.384	0	CD8T_c03-CX3CR1	DHRS7
0	0.317026	0.174	0.058	0	CD8T_c03-CX3CR1	FUT11
0	0.316259	0.297	0.165	0	CD8T_c03-CX3CR1	FBXW5
0	0.315164	0.528	0.382	0	CD8T_c03-CX3CR1	PRMT2
0	0.31428	0.423	0.259	0	CD8T_c03-CX3CR1	ITGAL
0	0.312144	0.697	0.547	0	CD8T_c03-CX3CR1	ARL6IP5
0	0.311743	0.238	0.115	0	CD8T_c03-CX3CR1	TMEM173
0	0.311725	0.504	0.351	0	CD8T_c03-CX3CR1	CAST
0	0.310985	0.278	0.156	0	CD8T_c03-CX3CR1	ARHGEF3
0	0.310527	0.168	0.064	0	CD8T_c03-CX3CR1	LAIR1
0	0.310224	0.29	0.155	0	CD8T_c03-CX3CR1	ARHGAP25
0	0.307063	0.2	0.084	0	CD8T_c03-CX3CR1	TFDP2
0	0.302429	0.691	0.519	0	CD8T_c03-CX3CR1	GSTP1
0	0.301815	0.159	0.049	0	CD8T_c03-CX3CR1	ANXA4
0	0.301713	0.284	0.149	0	CD8T_c03-CX3CR1	LPCAT1
0	0.300819	0.137	0.041	0	CD8T_c03-CX3CR1	FGL2
0	0.298863	0.438	0.285	0	CD8T_c03-CX3CR1	IL10RA
0	0.295771	0.679	0.548	0	CD8T_c03-CX3CR1	CAP1
0	0.29545	0.288	0.164	0	CD8T_c03-CX3CR1	SRPK2
0	0.293347	0.236	0.115	0	CD8T_c03-CX3CR1	RAB37
0	0.290189	0.41	0.24	0	CD8T_c03-CX3CR1	ABI3
0	0.288614	0.155	0.047	0	CD8T_c03-CX3CR1	CALHM2
0	0.287579	0.483	0.316	0	CD8T_c03-CX3CR1	APOBEC3G
0	0.283314	0.122	0.029	0	CD8T_c03-CX3CR1	SSBP3
0	0.283294	0.385	0.244	0	CD8T_c03-CX3CR1	LYAR
0	0.282983	0.173	0.075	0	CD8T_c03-CX3CR1	PLEKHA1
0	0.282126	0.194	0.089	0	CD8T_c03-CX3CR1	CYTH4
0	0.278369	0.596	0.436	0	CD8T_c03-CX3CR1	ARL4C
0	0.278341	0.224	0.114	0	CD8T_c03-CX3CR1	RNPEPL1
0	0.27704	0.952	0.925	0	CD8T_c03-CX3CR1	ACTG1
0	0.276262	0.11	0.02	0	CD8T_c03-CX3CR1	TTC16
0	0.276209	0.159	0.058	0	CD8T_c03-CX3CR1	JAZF1
0	0.275489	1	1	0	CD8T_c03-CX3CR1	B2M
0	0.269576	0.496	0.34	0	CD8T_c03-CX3CR1	APMAP
0	0.26866	0.159	0.056	0	CD8T_c03-CX3CR1	PRR5L
0	0.266849	0.915	0.864	0	CD8T_c03-CX3CR1	HCST
0	0.265066	0.18	0.078	0	CD8T_c03-CX3CR1	PTGDR
0	0.263294	0.158	0.059	0	CD8T_c03-CX3CR1	USP28
0	0.261463	0.998	0.995	0	CD8T_c03-CX3CR1	HLA-C
0	0.261138	0.272	0.147	0	CD8T_c03-CX3CR1	BATF
0	0.259324	0.781	0.641	0	CD8T_c03-CX3CR1	GZMM
0	0.257895	0.707	0.488	0	CD8T_c03-CX3CR1	HLA-DPA1
0	0.25774	0.639	0.493	0	CD8T_c03-CX3CR1	DBI
0	0.253911	0.142	0.051	0	CD8T_c03-CX3CR1	C11orf21
0	0.25221	0.868	0.778	0	CD8T_c03-CX3CR1	RHOA
0	0.250737	0.119	0.034	0	CD8T_c03-CX3CR1	GAB3
1.65e-307	0.293326	0.231	0.121	2.53e-303	CD8T_c03-CX3CR1	RAP2B
2.84e-307	0.263557	0.588	0.457	4.36e-303	CD8T_c03-CX3CR1	BRK1
2.75e-304	0.25832	0.4	0.259	4.22e-300	CD8T_c03-CX3CR1	IDH2
3.76e-304	0.250095	0.779	0.678	5.77e-300	CD8T_c03-CX3CR1	ARPC1B
4.91e-303	0.306664	0.387	0.259	7.54e-299	CD8T_c03-CX3CR1	BIN1
1.33e-297	0.291157	0.369	0.241	2.04e-293	CD8T_c03-CX3CR1	S1PR4
6.03e-291	0.261799	0.64	0.517	9.25e-287	CD8T_c03-CX3CR1	PRR13
3.57e-287	0.272609	0.247	0.138	5.49e-283	CD8T_c03-CX3CR1	TSPAN14
7.64e-286	0.284044	0.447	0.318	1.17e-281	CD8T_c03-CX3CR1	HMGN3
1.53e-284	0.257408	0.483	0.351	2.35e-280	CD8T_c03-CX3CR1	NDUFB10
6.64e-281	0.275211	0.316	0.196	1.02e-276	CD8T_c03-CX3CR1	CTDSP1
9.21e-281	0.272647	0.455	0.322	1.41e-276	CD8T_c03-CX3CR1	CSK
1.68e-274	0.262357	0.543	0.421	2.58e-270	CD8T_c03-CX3CR1	VAMP8
2.9e-274	0.28051	0.328	0.209	4.45e-270	CD8T_c03-CX3CR1	TES
1.74e-273	0.270786	0.509	0.382	2.68e-269	CD8T_c03-CX3CR1	PSAP
8.26e-272	0.265412	0.314	0.193	1.27e-267	CD8T_c03-CX3CR1	ZBTB38
4e-270	0.251779	0.212	0.111	6.14e-266	CD8T_c03-CX3CR1	ADAM8
3.62e-269	0.252201	0.24	0.134	5.56e-265	CD8T_c03-CX3CR1	CYB561D2
2.89e-268	0.263871	0.258	0.148	4.44e-264	CD8T_c03-CX3CR1	CISD3
1.17e-265	0.276175	0.299	0.186	1.8e-261	CD8T_c03-CX3CR1	ARL5A
7.03e-257	0.261039	0.354	0.235	1.08e-252	CD8T_c03-CX3CR1	HMOX2
4.46e-255	0.253734	0.199	0.105	6.84e-251	CD8T_c03-CX3CR1	PIK3R5
8.46e-254	0.265719	0.441	0.322	1.3e-249	CD8T_c03-CX3CR1	NDUFA12
3.47e-253	0.250002	0.399	0.272	5.33e-249	CD8T_c03-CX3CR1	IQGAP2
2.5e-252	0.26511	0.267	0.156	3.83e-248	CD8T_c03-CX3CR1	MYBL1
2.16e-251	0.258201	0.352	0.232	3.32e-247	CD8T_c03-CX3CR1	ARHGAP30
1.07e-249	0.252289	0.466	0.345	1.64e-245	CD8T_c03-CX3CR1	LAMTOR4
3.85e-249	0.270435	0.488	0.367	5.9e-245	CD8T_c03-CX3CR1	CD47
4.33e-234	0.282366	0.354	0.241	6.65e-230	CD8T_c03-CX3CR1	PTPN6
3.52e-227	0.321996	0.154	0.075	5.41e-223	CD8T_c03-CX3CR1	TRGV4
6.59e-223	0.258094	0.36	0.249	1.01e-218	CD8T_c03-CX3CR1	SYTL1
4.28e-220	0.267507	0.685	0.56	6.57e-216	CD8T_c03-CX3CR1	CD8B
9.42e-209	0.444353	0.109	0.047	1.45e-204	CD8T_c03-CX3CR1	TRAV29DV5
1.3e-201	0.255463	0.411	0.304	2e-197	CD8T_c03-CX3CR1	ZYX
9.34e-188	0.338477	0.199	0.115	1.43e-183	CD8T_c03-CX3CR1	TRGV2
1.96e-176	0.430748	0.162	0.089	3.02e-172	CD8T_c03-CX3CR1	TYROBP
1.19e-161	0.465656	0.124	0.063	1.83e-157	CD8T_c03-CX3CR1	TRBV28
1.04e-118	0.251525	0.33	0.25	1.59e-114	CD8T_c03-CX3CR1	CMC1
5.74e-100	0.250769	0.112	0.065	8.82e-96	CD8T_c03-CX3CR1	TRGV8
0	0.922164	0.995	0.833	0	CD8T_c04-GZMK-SIRPG	CCL5
0	0.854557	0.98	0.867	0	CD8T_c04-GZMK-SIRPG	CD74
0	0.794812	0.948	0.718	0	CD8T_c04-GZMK-SIRPG	GZMA
0	0.788187	0.563	0.309	0	CD8T_c04-GZMK-SIRPG	CD27
0	0.757784	0.449	0.202	0	CD8T_c04-GZMK-SIRPG	SIT1
0	0.747794	0.482	0.194	0	CD8T_c04-GZMK-SIRPG	HSPA1A
0	0.73482	0.876	0.724	0	CD8T_c04-GZMK-SIRPG	RARRES3
0	0.728311	0.132	0.021	0	CD8T_c04-GZMK-SIRPG	HSPA6
0	0.72526	0.837	0.513	0	CD8T_c04-GZMK-SIRPG	GZMK
0	0.702868	0.401	0.158	0	CD8T_c04-GZMK-SIRPG	HLA-DQB1
0	0.696872	0.671	0.411	0	CD8T_c04-GZMK-SIRPG	GIMAP4
0	0.679784	0.423	0.137	0	CD8T_c04-GZMK-SIRPG	HSPA1B
0	0.669287	0.954	0.872	0	CD8T_c04-GZMK-SIRPG	PTPRCAP
0	0.642123	0.36	0.181	0	CD8T_c04-GZMK-SIRPG	SIRPG
0	0.63783	0.526	0.325	0	CD8T_c04-GZMK-SIRPG	LINC00861
0	0.62892	0.74	0.504	0	CD8T_c04-GZMK-SIRPG	GIMAP7
0	0.609818	0.51	0.251	0	CD8T_c04-GZMK-SIRPG	HLA-DRA
0	0.600525	0.791	0.47	0	CD8T_c04-GZMK-SIRPG	HLA-DRB1
0	0.595083	0.47	0.301	0	CD8T_c04-GZMK-SIRPG	TRAC
0	0.584451	0.434	0.208	0	CD8T_c04-GZMK-SIRPG	HLA-DRB5
0	0.574655	0.733	0.511	0	CD8T_c04-GZMK-SIRPG	HLA-DPA1
0	0.570407	0.434	0.266	0	CD8T_c04-GZMK-SIRPG	DENND2D
0	0.569248	0.755	0.54	0	CD8T_c04-GZMK-SIRPG	HLA-DPB1
0	0.565858	0.495	0.331	0	CD8T_c04-GZMK-SIRPG	UBE2L6
0	0.565037	0.698	0.558	0	CD8T_c04-GZMK-SIRPG	TRBC2
0	0.564005	0.821	0.678	0	CD8T_c04-GZMK-SIRPG	PSMB9
0	0.555747	0.751	0.601	0	CD8T_c04-GZMK-SIRPG	CD2
0	0.551334	0.519	0.34	0	CD8T_c04-GZMK-SIRPG	PPP1R18
0	0.547813	0.864	0.714	0	CD8T_c04-GZMK-SIRPG	CLIC1
0	0.544172	0.358	0.193	0	CD8T_c04-GZMK-SIRPG	PYCARD
0	0.53421	0.343	0.162	0	CD8T_c04-GZMK-SIRPG	CXCR3
0	0.52967	0.744	0.631	0	CD8T_c04-GZMK-SIRPG	PSME2
0	0.527409	0.618	0.479	0	CD8T_c04-GZMK-SIRPG	PSMB10
0	0.507997	0.721	0.616	0	CD8T_c04-GZMK-SIRPG	EVL
0	0.49232	0.656	0.501	0	CD8T_c04-GZMK-SIRPG	COTL1
0	0.482376	0.327	0.162	0	CD8T_c04-GZMK-SIRPG	HLA-DMA
0	0.474905	0.991	0.975	0	CD8T_c04-GZMK-SIRPG	PFN1
0	0.474835	0.958	0.928	0	CD8T_c04-GZMK-SIRPG	ACTG1
0	0.465254	0.19	0.064	0	CD8T_c04-GZMK-SIRPG	SLF1
0	0.455066	0.909	0.855	0	CD8T_c04-GZMK-SIRPG	CD3D
0	0.453695	0.123	0.02	0	CD8T_c04-GZMK-SIRPG	AC004832.6
0	0.442363	0.751	0.65	0	CD8T_c04-GZMK-SIRPG	FYB1
0	0.431668	0.925	0.869	0	CD8T_c04-GZMK-SIRPG	HCST
0	0.431039	0.882	0.836	0	CD8T_c04-GZMK-SIRPG	PSME1
0	0.423386	0.884	0.826	0	CD8T_c04-GZMK-SIRPG	RAC2
0	0.42034	0.986	0.972	0	CD8T_c04-GZMK-SIRPG	IL32
0	0.419358	0.917	0.868	0	CD8T_c04-GZMK-SIRPG	CORO1A
0	0.419117	0.958	0.793	0	CD8T_c04-GZMK-SIRPG	NKG7
0	0.399213	0.839	0.784	0	CD8T_c04-GZMK-SIRPG	ATP5MC2
0	0.39505	0.156	0.049	0	CD8T_c04-GZMK-SIRPG	CHI3L2
0	0.351385	0.937	0.893	0	CD8T_c04-GZMK-SIRPG	MYL12A
0	0.344441	0.952	0.92	0	CD8T_c04-GZMK-SIRPG	ATP5F1E
0	0.31171	0.966	0.934	0	CD8T_c04-GZMK-SIRPG	SH3BGRL3
0	0.306327	0.944	0.916	0	CD8T_c04-GZMK-SIRPG	SERF2
0	0.285241	0.998	0.998	0	CD8T_c04-GZMK-SIRPG	ACTB
0	0.253754	0.987	0.977	0	CD8T_c04-GZMK-SIRPG	TMSB10
1.25e-296	0.500251	0.44	0.267	1.93e-292	CD8T_c04-GZMK-SIRPG	CYTOR
7.75e-292	0.489558	0.466	0.303	1.19e-287	CD8T_c04-GZMK-SIRPG	RCSD1
2.99e-273	0.501863	0.336	0.183	4.6e-269	CD8T_c04-GZMK-SIRPG	GPR174
1.48e-269	0.499948	0.408	0.255	2.27e-265	CD8T_c04-GZMK-SIRPG	SASH3
7.94e-269	0.451315	0.307	0.157	1.22e-264	CD8T_c04-GZMK-SIRPG	EOMES
2.87e-264	0.674454	0.26	0.129	4.41e-260	CD8T_c04-GZMK-SIRPG	PRMT9
1.66e-263	0.398857	0.701	0.626	2.55e-259	CD8T_c04-GZMK-SIRPG	GMFG
4.06e-262	0.491801	0.499	0.356	6.24e-258	CD8T_c04-GZMK-SIRPG	LCP2
1.36e-250	0.461291	0.425	0.276	2.09e-246	CD8T_c04-GZMK-SIRPG	ARPC5L
4.58e-250	0.465217	0.345	0.199	7.03e-246	CD8T_c04-GZMK-SIRPG	AC116366.3
7.03e-250	0.391007	0.744	0.64	1.08e-245	CD8T_c04-GZMK-SIRPG	CTSW
1.99e-245	0.403974	0.702	0.573	3.05e-241	CD8T_c04-GZMK-SIRPG	CD8B
3.64e-240	0.357115	0.409	0.237	5.59e-236	CD8T_c04-GZMK-SIRPG	HLA-DQA1
1.28e-239	0.482799	0.512	0.365	1.96e-235	CD8T_c04-GZMK-SIRPG	GBP5
8.98e-238	0.41784	0.531	0.385	1.38e-233	CD8T_c04-GZMK-SIRPG	TRAF3IP3
7.68e-231	0.301451	0.627	0.414	1.18e-226	CD8T_c04-GZMK-SIRPG	GZMH
9.34e-224	0.473389	0.403	0.259	1.43e-219	CD8T_c04-GZMK-SIRPG	IKZF3
1.15e-223	0.449489	0.413	0.274	1.76e-219	CD8T_c04-GZMK-SIRPG	IDH2
5.39e-216	0.619276	0.39	0.254	8.28e-212	CD8T_c04-GZMK-SIRPG	CMC1
5.77e-214	0.387383	0.652	0.574	8.86e-210	CD8T_c04-GZMK-SIRPG	RNASEK
1.57e-212	0.400468	0.595	0.504	2.41e-208	CD8T_c04-GZMK-SIRPG	PSMB8
1.37e-208	0.412317	0.579	0.488	2.1e-204	CD8T_c04-GZMK-SIRPG	DRAP1
3.9e-208	0.357538	0.727	0.669	5.99e-204	CD8T_c04-GZMK-SIRPG	LIMD2
2.16e-207	0.435176	0.413	0.277	3.32e-203	CD8T_c04-GZMK-SIRPG	GIMAP1
2.55e-205	0.409057	0.594	0.502	3.91e-201	CD8T_c04-GZMK-SIRPG	STK17A
4.45e-204	0.356035	0.63	0.543	6.83e-200	CD8T_c04-GZMK-SIRPG	PPP1CA
5.34e-203	0.303477	0.115	0.038	8.2e-199	CD8T_c04-GZMK-SIRPG	XIST
4.54e-197	0.335785	0.694	0.641	6.97e-193	CD8T_c04-GZMK-SIRPG	LCK
1.04e-191	0.418576	0.457	0.338	1.59e-187	CD8T_c04-GZMK-SIRPG	CSK
4.44e-185	0.329978	0.687	0.636	6.82e-181	CD8T_c04-GZMK-SIRPG	COX6B1
3.03e-184	0.321392	0.752	0.711	4.65e-180	CD8T_c04-GZMK-SIRPG	PPDPF
3.56e-182	0.278119	0.795	0.778	5.47e-178	CD8T_c04-GZMK-SIRPG	ARPC3
2.19e-181	0.406327	0.254	0.139	3.36e-177	CD8T_c04-GZMK-SIRPG	SLAMF7
1.29e-180	0.358496	0.649	0.581	1.98e-176	CD8T_c04-GZMK-SIRPG	CNN2
1.97e-176	0.361452	0.591	0.486	3.02e-172	CD8T_c04-GZMK-SIRPG	CTSC
7.55e-176	0.417121	0.357	0.23	1.16e-171	CD8T_c04-GZMK-SIRPG	PYHIN1
3.91e-174	0.267218	0.762	0.692	6e-170	CD8T_c04-GZMK-SIRPG	ITGB2
9.22e-172	0.413491	0.278	0.162	1.42e-167	CD8T_c04-GZMK-SIRPG	GBP1
1.4e-170	0.403203	0.216	0.112	2.15e-166	CD8T_c04-GZMK-SIRPG	TRG-AS1
8.73e-166	0.33544	0.626	0.545	1.34e-161	CD8T_c04-GZMK-SIRPG	GSTP1
3.28e-165	0.312159	0.689	0.642	5.04e-161	CD8T_c04-GZMK-SIRPG	ELOB
2.94e-164	0.375499	0.6	0.535	4.51e-160	CD8T_c04-GZMK-SIRPG	2021-09-01
3.18e-160	0.423789	0.367	0.253	4.88e-156	CD8T_c04-GZMK-SIRPG	PTPN6
1.69e-159	0.377866	0.276	0.163	2.59e-155	CD8T_c04-GZMK-SIRPG	PLEKHF1
5.99e-156	0.309627	0.195	0.097	9.2e-152	CD8T_c04-GZMK-SIRPG	CD38
5.96e-155	0.410868	0.424	0.322	9.14e-151	CD8T_c04-GZMK-SIRPG	LIME1
8.23e-154	0.348974	0.62	0.54	1.26e-149	CD8T_c04-GZMK-SIRPG	RNF213
1.43e-153	0.395374	0.256	0.15	2.19e-149	CD8T_c04-GZMK-SIRPG	PECAM1
9.05e-153	0.332225	0.61	0.542	1.39e-148	CD8T_c04-GZMK-SIRPG	UQCR10
2.73e-150	0.318547	0.586	0.497	4.19e-146	CD8T_c04-GZMK-SIRPG	SLC9A3R1
1.87e-148	0.277282	0.767	0.741	2.87e-144	CD8T_c04-GZMK-SIRPG	OST4
2.56e-143	0.278337	0.727	0.695	3.93e-139	CD8T_c04-GZMK-SIRPG	ARPC1B
3.19e-142	0.388306	0.378	0.276	4.9e-138	CD8T_c04-GZMK-SIRPG	POLD4
2.84e-141	0.405252	0.431	0.329	4.35e-137	CD8T_c04-GZMK-SIRPG	CKLF
1.84e-140	0.358134	0.446	0.339	2.83e-136	CD8T_c04-GZMK-SIRPG	APOBEC3G
2.44e-140	0.345672	0.603	0.552	3.74e-136	CD8T_c04-GZMK-SIRPG	GYPC
3.78e-136	0.316174	0.156	0.076	5.8e-132	CD8T_c04-GZMK-SIRPG	ACP5
2.57e-133	0.308686	0.554	0.451	3.95e-129	CD8T_c04-GZMK-SIRPG	ITM2A
5.83e-133	0.331643	0.227	0.13	8.94e-129	CD8T_c04-GZMK-SIRPG	MIR4435-2HG
1.06e-132	0.277708	0.701	0.666	1.63e-128	CD8T_c04-GZMK-SIRPG	UQCR11
3.25e-132	0.365754	0.174	0.09	4.98e-128	CD8T_c04-GZMK-SIRPG	PTGDR
1.28e-130	0.33371	0.545	0.478	1.97e-126	CD8T_c04-GZMK-SIRPG	ATP5IF1
3.82e-130	0.267647	0.34	0.219	5.87e-126	CD8T_c04-GZMK-SIRPG	TIGIT
5.52e-128	0.361865	0.464	0.378	8.47e-124	CD8T_c04-GZMK-SIRPG	TBC1D10C
4.19e-127	0.35074	0.402	0.303	6.43e-123	CD8T_c04-GZMK-SIRPG	CARD16
7.72e-127	0.39608	0.357	0.26	1.19e-122	CD8T_c04-GZMK-SIRPG	SYNRG
7.26e-126	0.275948	0.675	0.652	1.11e-121	CD8T_c04-GZMK-SIRPG	GABARAP
6.41e-125	0.374572	0.42	0.333	9.85e-121	CD8T_c04-GZMK-SIRPG	BST2
3.98e-124	0.36711	0.405	0.312	6.11e-120	CD8T_c04-GZMK-SIRPG	IL16
7.61e-124	0.285139	0.128	0.059	1.17e-119	CD8T_c04-GZMK-SIRPG	S100PBP
5.82e-123	0.310077	0.239	0.14	8.93e-119	CD8T_c04-GZMK-SIRPG	IFNG
1.2e-122	0.319877	0.598	0.551	1.85e-118	CD8T_c04-GZMK-SIRPG	HIGD2A
2.07e-121	0.290459	0.632	0.588	3.17e-117	CD8T_c04-GZMK-SIRPG	GPSM3
6.78e-121	0.353857	0.355	0.254	1.04e-116	CD8T_c04-GZMK-SIRPG	SAMD3
2.96e-119	0.38605	0.404	0.317	4.55e-115	CD8T_c04-GZMK-SIRPG	ZYX
1.92e-117	0.372143	0.461	0.366	2.95e-113	CD8T_c04-GZMK-SIRPG	STAT1
2.02e-117	0.296257	0.623	0.58	3.09e-113	CD8T_c04-GZMK-SIRPG	LY6E
2.3e-114	0.360365	0.391	0.303	3.53e-110	CD8T_c04-GZMK-SIRPG	CASP4
3.62e-112	0.261791	0.119	0.055	5.56e-108	CD8T_c04-GZMK-SIRPG	AC090152.1
2.38e-110	0.340579	0.302	0.211	3.65e-106	CD8T_c04-GZMK-SIRPG	POLR2G
7.17e-110	0.255244	0.706	0.688	1.1e-105	CD8T_c04-GZMK-SIRPG	UBL5
1.78e-109	0.320189	0.514	0.457	2.73e-105	CD8T_c04-GZMK-SIRPG	TRAPPC1
3.32e-108	0.299745	0.351	0.246	5.1e-104	CD8T_c04-GZMK-SIRPG	PLEK
3.32e-106	0.325092	0.443	0.37	5.09e-102	CD8T_c04-GZMK-SIRPG	NDUFB10
4.22e-106	0.332104	0.313	0.218	6.49e-102	CD8T_c04-GZMK-SIRPG	CD81
4.38e-106	0.327445	0.206	0.125	6.72e-102	CD8T_c04-GZMK-SIRPG	GIMAP6
6.27e-106	0.326853	0.242	0.156	9.62e-102	CD8T_c04-GZMK-SIRPG	SH3BP1
1.71e-103	0.298057	0.29	0.194	2.62e-99	CD8T_c04-GZMK-SIRPG	AOAH
2.05e-103	0.29804	0.191	0.111	3.14e-99	CD8T_c04-GZMK-SIRPG	CD84
4.29e-103	0.358306	0.313	0.228	6.58e-99	CD8T_c04-GZMK-SIRPG	RBCK1
2.54e-102	0.324445	0.255	0.169	3.9e-98	CD8T_c04-GZMK-SIRPG	PDLIM2
1.1e-100	0.34448	0.281	0.197	1.69e-96	CD8T_c04-GZMK-SIRPG	C11orf98
1.75e-100	0.281551	0.609	0.576	2.68e-96	CD8T_c04-GZMK-SIRPG	GSTK1
3.03e-98	0.293864	0.565	0.528	4.65e-94	CD8T_c04-GZMK-SIRPG	ATP5F1D
6.15e-98	0.299886	0.19	0.114	9.44e-94	CD8T_c04-GZMK-SIRPG	DUSP23
1.15e-97	0.401413	0.126	0.063	1.77e-93	CD8T_c04-GZMK-SIRPG	CCL3
3.39e-97	0.368374	0.28	0.198	5.21e-93	CD8T_c04-GZMK-SIRPG	CORO1B
8.93e-97	0.307745	0.211	0.132	1.37e-92	CD8T_c04-GZMK-SIRPG	RAB37
7.85e-96	0.287342	0.393	0.303	1.21e-91	CD8T_c04-GZMK-SIRPG	SH2D1A
8.98e-96	0.312495	0.355	0.265	1.38e-91	CD8T_c04-GZMK-SIRPG	ABI3
1.36e-94	0.273141	0.599	0.565	2.09e-90	CD8T_c04-GZMK-SIRPG	COX8A
1.81e-94	0.31694	0.507	0.451	2.77e-90	CD8T_c04-GZMK-SIRPG	ACAP1
2.28e-94	0.336215	0.317	0.23	3.49e-90	CD8T_c04-GZMK-SIRPG	SLFN5
4.56e-93	0.290482	0.185	0.11	7e-89	CD8T_c04-GZMK-SIRPG	SLAMF6
3.3e-91	0.302389	0.451	0.387	5.07e-87	CD8T_c04-GZMK-SIRPG	PRELID1
3.77e-91	0.328779	0.359	0.269	5.78e-87	CD8T_c04-GZMK-SIRPG	LAG3
5.58e-91	0.318706	0.238	0.159	8.57e-87	CD8T_c04-GZMK-SIRPG	APOBEC3C
6.35e-88	0.312453	0.365	0.284	9.74e-84	CD8T_c04-GZMK-SIRPG	ITGAL
5.07e-87	0.265268	0.602	0.574	7.78e-83	CD8T_c04-GZMK-SIRPG	KRTCAP2
9.78e-87	0.340259	0.27	0.193	1.5e-82	CD8T_c04-GZMK-SIRPG	RSBN1L
2.83e-85	0.332426	0.323	0.248	4.35e-81	CD8T_c04-GZMK-SIRPG	IFI27L2
4.99e-85	0.293962	0.473	0.416	7.66e-81	CD8T_c04-GZMK-SIRPG	LAT
7.84e-84	0.293742	0.243	0.164	1.2e-79	CD8T_c04-GZMK-SIRPG	BATF
7.17e-83	0.331026	0.408	0.335	1.1e-78	CD8T_c04-GZMK-SIRPG	KIAA1551
4.04e-82	0.308229	0.443	0.38	6.2e-78	CD8T_c04-GZMK-SIRPG	YPEL3
1.03e-81	0.261332	0.566	0.537	1.59e-77	CD8T_c04-GZMK-SIRPG	PARK7
2.32e-79	0.31591	0.337	0.264	3.57e-75	CD8T_c04-GZMK-SIRPG	TAF10
2.77e-77	0.330915	0.239	0.168	4.25e-73	CD8T_c04-GZMK-SIRPG	BLOC1S1
1.53e-76	0.282076	0.21	0.14	2.34e-72	CD8T_c04-GZMK-SIRPG	HACD4
2.52e-76	0.280007	0.525	0.488	3.87e-72	CD8T_c04-GZMK-SIRPG	C9orf16
8.73e-76	0.312056	0.264	0.194	1.34e-71	CD8T_c04-GZMK-SIRPG	DGCR6L
1.28e-75	0.265574	0.526	0.494	1.96e-71	CD8T_c04-GZMK-SIRPG	ATP5MF
5.26e-75	0.287859	0.235	0.163	8.07e-71	CD8T_c04-GZMK-SIRPG	RGS19
8.52e-75	0.253778	0.174	0.108	1.31e-70	CD8T_c04-GZMK-SIRPG	PTTG1
1.7e-74	0.308568	0.301	0.232	2.61e-70	CD8T_c04-GZMK-SIRPG	MRPS34
2.1e-74	0.273675	0.505	0.467	3.23e-70	CD8T_c04-GZMK-SIRPG	WDR83OS
2.42e-73	0.282902	0.219	0.149	3.72e-69	CD8T_c04-GZMK-SIRPG	GIMAP2
8.86e-73	0.301915	0.396	0.337	1.36e-68	CD8T_c04-GZMK-SIRPG	NOP10
9.73e-73	0.317213	0.292	0.224	1.49e-68	CD8T_c04-GZMK-SIRPG	PGLS
2.2e-72	0.301452	0.364	0.299	3.38e-68	CD8T_c04-GZMK-SIRPG	RNF167
4.16e-72	0.299297	0.349	0.285	6.38e-68	CD8T_c04-GZMK-SIRPG	AIP
3.39e-71	0.306468	0.328	0.263	5.21e-67	CD8T_c04-GZMK-SIRPG	TWF2
1.11e-70	0.30797	0.32	0.253	1.7e-66	CD8T_c04-GZMK-SIRPG	VAMP5
9.59e-70	0.263018	0.16	0.099	1.47e-65	CD8T_c04-GZMK-SIRPG	SAMD9L
3e-69	0.291176	0.414	0.361	4.6e-65	CD8T_c04-GZMK-SIRPG	CHURC1
4.14e-69	0.277602	0.264	0.195	6.35e-65	CD8T_c04-GZMK-SIRPG	HSPB11
1.28e-68	0.270289	0.232	0.163	1.96e-64	CD8T_c04-GZMK-SIRPG	CISD3
2.54e-67	0.287473	0.379	0.315	3.89e-63	CD8T_c04-GZMK-SIRPG	BTN3A2
3.33e-66	0.251962	0.11	0.061	5.11e-62	CD8T_c04-GZMK-SIRPG	DNAJB4
1.34e-65	0.286502	0.217	0.152	2.06e-61	CD8T_c04-GZMK-SIRPG	AGTRAP
4.19e-65	0.257089	0.461	0.422	6.43e-61	CD8T_c04-GZMK-SIRPG	COX5A
2.45e-62	0.285339	0.368	0.316	3.76e-58	CD8T_c04-GZMK-SIRPG	DYNLRB1
1.9e-61	0.28311	0.226	0.161	2.92e-57	CD8T_c04-GZMK-SIRPG	GBP4
8.12e-61	0.290626	0.276	0.211	1.25e-56	CD8T_c04-GZMK-SIRPG	ZBTB38
1.14e-60	0.259482	0.493	0.465	1.75e-56	CD8T_c04-GZMK-SIRPG	DAD1
4.95e-60	0.268914	0.44	0.4	7.6e-56	CD8T_c04-GZMK-SIRPG	MZT2A
6.43e-60	0.307766	0.367	0.314	9.86e-56	CD8T_c04-GZMK-SIRPG	NUCB2
1.37e-58	0.269769	0.41	0.364	2.11e-54	CD8T_c04-GZMK-SIRPG	LAMTOR4
2.79e-58	0.251378	0.508	0.477	4.28e-54	CD8T_c04-GZMK-SIRPG	NDUFA3
5.34e-58	0.260442	0.48	0.444	8.2e-54	CD8T_c04-GZMK-SIRPG	SKAP1
5.48e-58	0.279051	0.41	0.364	8.41e-54	CD8T_c04-GZMK-SIRPG	TSPO
5.08e-57	0.270889	0.283	0.22	7.8e-53	CD8T_c04-GZMK-SIRPG	PSTPIP1
6.3e-57	0.273087	0.161	0.106	9.67e-53	CD8T_c04-GZMK-SIRPG	KMT2E-AS1
6.65e-57	0.260049	0.182	0.124	1.02e-52	CD8T_c04-GZMK-SIRPG	NLRC3
9.28e-57	0.293167	0.372	0.32	1.43e-52	CD8T_c04-GZMK-SIRPG	SAMHD1
6.44e-56	0.28675	0.356	0.305	9.89e-52	CD8T_c04-GZMK-SIRPG	TNFRSF14
1.19e-54	0.365969	0.605	0.602	1.82e-50	CD8T_c04-GZMK-SIRPG	DNAJB1
1.17e-52	0.271086	0.238	0.182	1.8e-48	CD8T_c04-GZMK-SIRPG	GSTO1
1.53e-50	0.278104	0.225	0.17	2.34e-46	CD8T_c04-GZMK-SIRPG	NT5C
5.54e-50	0.262955	0.337	0.283	8.5e-46	CD8T_c04-GZMK-SIRPG	RASAL3
3.12e-48	0.253699	0.418	0.381	4.78e-44	CD8T_c04-GZMK-SIRPG	WAS
5.4e-48	0.261124	0.261	0.208	8.29e-44	CD8T_c04-GZMK-SIRPG	LSM2
6.24e-48	0.267895	0.276	0.226	9.57e-44	CD8T_c04-GZMK-SIRPG	NDUFB3
1.88e-45	0.257115	0.293	0.243	2.89e-41	CD8T_c04-GZMK-SIRPG	CMTM3
3.37e-45	0.265908	0.344	0.304	5.18e-41	CD8T_c04-GZMK-SIRPG	C8orf59
2.76e-43	0.293885	0.363	0.326	4.24e-39	CD8T_c04-GZMK-SIRPG	HSPB1
1.13e-41	0.260861	0.307	0.261	1.74e-37	CD8T_c04-GZMK-SIRPG	NDUFA11
1.93e-41	0.259112	0.29	0.241	2.97e-37	CD8T_c04-GZMK-SIRPG	SP110
3.43e-41	0.253413	0.308	0.261	5.27e-37	CD8T_c04-GZMK-SIRPG	MAP2K2
1.5e-40	0.255355	0.298	0.254	2.3e-36	CD8T_c04-GZMK-SIRPG	HMOX2
9.83e-39	0.251596	0.35	0.313	1.51e-34	CD8T_c04-GZMK-SIRPG	MRPL41
6.22e-32	0.278474	0.343	0.305	9.55e-28	CD8T_c04-GZMK-SIRPG	H1FX
1.78e-30	0.27026	0.401	0.386	2.73e-26	CD8T_c04-GZMK-SIRPG	CCT4
0	1.87228	0.692	0.018	0	CD8T_c05-GZMK-GPR183	FXYD2
0	1.32168	0.889	0.326	0	CD8T_c05-GZMK-GPR183	CD27
0	1.2584	0.6	0.117	0	CD8T_c05-GZMK-GPR183	LGALS3
0	1.05081	0.471	0.014	0	CD8T_c05-GZMK-GPR183	AC004585.1
0	0.945271	0.451	0.045	0	CD8T_c05-GZMK-GPR183	PGM2L1
0	0.81395	0.449	0.05	0	CD8T_c05-GZMK-GPR183	HAVCR2
0	0.7289	0.316	0.005	0	CD8T_c05-GZMK-GPR183	MYB
0	0.720838	0.325	0.007	0	CD8T_c05-GZMK-GPR183	SESTD1
0	0.657517	0.287	0.011	0	CD8T_c05-GZMK-GPR183	MIR4422HG
0	0.639453	0.217	0.012	0	CD8T_c05-GZMK-GPR183	HMOX1
0	0.629103	0.24	0.002	0	CD8T_c05-GZMK-GPR183	CAV1
0	0.503208	0.2	0.008	0	CD8T_c05-GZMK-GPR183	PRDM8
0	0.473323	0.238	0.013	0	CD8T_c05-GZMK-GPR183	FGFR1
0	0.452665	0.27	0.022	0	CD8T_c05-GZMK-GPR183	MYL6B
0	0.440424	0.227	0.015	0	CD8T_c05-GZMK-GPR183	AFF3
0	0.377294	0.186	0.002	0	CD8T_c05-GZMK-GPR183	POU2AF1
0	0.323564	0.129	0.004	0	CD8T_c05-GZMK-GPR183	NREP
0	0.293611	0.146	0.007	0	CD8T_c05-GZMK-GPR183	CXCR5
0	0.284086	0.122	0	0	CD8T_c05-GZMK-GPR183	PTPN3
0	0.281319	0.121	0.003	0	CD8T_c05-GZMK-GPR183	TIMD4
0	0.274573	0.108	0.003	0	CD8T_c05-GZMK-GPR183	AC133644.2
0	0.273251	0.121	0.003	0	CD8T_c05-GZMK-GPR183	PACSIN1
2.62e-298	0.803284	0.478	0.078	4.02e-294	CD8T_c05-GZMK-GPR183	LINC01550
5.04e-293	1.25052	0.786	0.228	7.73e-289	CD8T_c05-GZMK-GPR183	TCF7
1.65e-284	1.29246	0.913	0.38	2.53e-280	CD8T_c05-GZMK-GPR183	FCMR
2.43e-278	0.493771	0.284	0.03	3.73e-274	CD8T_c05-GZMK-GPR183	MPP1
1.24e-255	0.372935	0.208	0.018	1.91e-251	CD8T_c05-GZMK-GPR183	SMCO4
1.63e-253	0.879896	0.422	0.07	2.51e-249	CD8T_c05-GZMK-GPR183	SESN3
6.11e-252	0.885308	0.567	0.123	9.38e-248	CD8T_c05-GZMK-GPR183	SPTBN1
1.79e-243	1.13543	0.837	0.315	2.75e-239	CD8T_c05-GZMK-GPR183	NUCB2
7e-242	1.12006	0.84	0.312	1.08e-237	CD8T_c05-GZMK-GPR183	RCSD1
1.67e-241	0.948055	0.694	0.177	2.57e-237	CD8T_c05-GZMK-GPR183	GPR183
1.8e-241	0.580145	0.292	0.036	2.76e-237	CD8T_c05-GZMK-GPR183	ANTXR2
6e-236	1.09609	0.968	0.672	9.21e-232	CD8T_c05-GZMK-GPR183	LIMD2
4.22e-227	1.0843	0.694	0.195	6.48e-223	CD8T_c05-GZMK-GPR183	SELL
1.09e-223	0.424519	0.238	0.026	1.67e-219	CD8T_c05-GZMK-GPR183	AC084033.3
8.54e-223	0.943581	0.789	0.279	1.31e-218	CD8T_c05-GZMK-GPR183	MCUB
3.68e-219	1.08007	0.738	0.262	5.65e-215	CD8T_c05-GZMK-GPR183	S1PR4
2.35e-214	0.444681	0.252	0.03	3.6e-210	CD8T_c05-GZMK-GPR183	CDCA7
3.04e-210	0.640325	0.389	0.068	4.67e-206	CD8T_c05-GZMK-GPR183	ID3
2.12e-209	0.731336	0.997	0.995	3.26e-205	CD8T_c05-GZMK-GPR183	TMSB4X
1.82e-206	0.948937	0.775	0.276	2.8e-202	CD8T_c05-GZMK-GPR183	DENND2D
3.43e-200	0.595742	0.398	0.074	5.26e-196	CD8T_c05-GZMK-GPR183	ITGB2-AS1
2.69e-199	0.772723	0.622	0.171	4.13e-195	CD8T_c05-GZMK-GPR183	CMTM7
3.12e-188	0.905672	0.944	0.63	4.79e-184	CD8T_c05-GZMK-GPR183	GMFG
1.82e-184	1.03411	0.952	0.537	2.79e-180	CD8T_c05-GZMK-GPR183	GZMK
3.56e-183	0.694562	0.565	0.145	5.46e-179	CD8T_c05-GZMK-GPR183	LEF1
2.8e-178	1.08067	0.986	0.93	4.29e-174	CD8T_c05-GZMK-GPR183	ACTG1
5.44e-176	0.913487	0.797	0.316	8.35e-172	CD8T_c05-GZMK-GPR183	RIPOR2
7.37e-171	0.960943	0.919	0.585	1.13e-166	CD8T_c05-GZMK-GPR183	CNN2
1.2e-169	0.87255	0.93	0.623	1.84e-165	CD8T_c05-GZMK-GPR183	AES
4.78e-168	0.841132	0.946	0.631	7.34e-164	CD8T_c05-GZMK-GPR183	LDHB
1.51e-167	0.93516	0.883	0.485	2.32e-163	CD8T_c05-GZMK-GPR183	2021-09-06
1.51e-165	0.632305	0.505	0.128	2.31e-161	CD8T_c05-GZMK-GPR183	CCM2
1.3e-164	0.483286	0.279	0.046	2e-160	CD8T_c05-GZMK-GPR183	BEX3
4.01e-163	0.688668	0.579	0.17	6.16e-159	CD8T_c05-GZMK-GPR183	RNASEH2B
8.15e-161	0.631796	0.337	0.065	1.25e-156	CD8T_c05-GZMK-GPR183	CAPG
1.49e-158	0.647185	0.522	0.14	2.29e-154	CD8T_c05-GZMK-GPR183	LIMS1
4.35e-157	0.856888	0.705	0.261	6.68e-153	CD8T_c05-GZMK-GPR183	FOXP1
6.35e-156	0.844071	0.91	0.561	9.75e-152	CD8T_c05-GZMK-GPR183	ISG20
7.67e-156	0.956963	0.868	0.5	1.18e-151	CD8T_c05-GZMK-GPR183	UCP2
4.92e-153	0.718866	0.494	0.135	7.56e-149	CD8T_c05-GZMK-GPR183	MT1F
2.06e-145	0.669999	0.554	0.162	3.17e-141	CD8T_c05-GZMK-GPR183	CCR7
2.75e-144	0.573488	0.349	0.075	4.23e-140	CD8T_c05-GZMK-GPR183	NCOA1
1.66e-143	0.667483	0.579	0.181	2.55e-139	CD8T_c05-GZMK-GPR183	CDC25B
9.57e-139	0.791766	0.892	0.554	1.47e-134	CD8T_c05-GZMK-GPR183	GYPC
1.45e-138	0.647553	0.532	0.159	2.23e-134	CD8T_c05-GZMK-GPR183	DGKA
2.53e-137	0.958367	0.762	0.356	3.89e-133	CD8T_c05-GZMK-GPR183	NOSIP
5.92e-134	0.389027	0.333	0.069	9.09e-130	CD8T_c05-GZMK-GPR183	CTLA4
2.35e-133	0.298362	0.16	0.02	3.61e-129	CD8T_c05-GZMK-GPR183	ADAT2
5.16e-133	0.833185	0.879	0.511	7.92e-129	CD8T_c05-GZMK-GPR183	COTL1
2.93e-132	0.718948	0.648	0.24	4.49e-128	CD8T_c05-GZMK-GPR183	EVI2B
3.77e-132	0.54639	0.467	0.128	5.79e-128	CD8T_c05-GZMK-GPR183	HDDC2
5.92e-128	0.542707	0.322	0.071	9.09e-124	CD8T_c05-GZMK-GPR183	POU2F2
1.06e-127	0.723127	0.637	0.235	1.63e-123	CD8T_c05-GZMK-GPR183	SLFN5
4.63e-127	0.655067	0.69	0.26	7.11e-123	CD8T_c05-GZMK-GPR183	SAMD3
1.68e-126	0.593689	0.473	0.136	2.58e-122	CD8T_c05-GZMK-GPR183	RAB37
2.82e-126	0.746957	0.529	0.173	4.34e-122	CD8T_c05-GZMK-GPR183	BRD7
2.77e-125	0.547889	0.397	0.103	4.26e-121	CD8T_c05-GZMK-GPR183	TESPA1
4.57e-125	0.615983	0.556	0.186	7.02e-121	CD8T_c05-GZMK-GPR183	R3HDM4
3.45e-124	0.423061	0.26	0.05	5.29e-120	CD8T_c05-GZMK-GPR183	LGALS9
3.56e-124	0.513321	0.321	0.071	5.47e-120	CD8T_c05-GZMK-GPR183	TMEM204
5.23e-124	0.696202	0.763	0.353	8.03e-120	CD8T_c05-GZMK-GPR183	FAM107B
5.57e-124	0.625957	0.546	0.178	8.54e-120	CD8T_c05-GZMK-GPR183	ARHGAP25
1.04e-123	0.561926	0.997	0.976	1.59e-119	CD8T_c05-GZMK-GPR183	PFN1
2.74e-123	0.471127	0.368	0.09	4.2e-119	CD8T_c05-GZMK-GPR183	PYM1
1.21e-121	0.604216	0.638	0.226	1.86e-117	CD8T_c05-GZMK-GPR183	TIGIT
1.72e-121	0.549517	0.395	0.104	2.64e-117	CD8T_c05-GZMK-GPR183	AC119396.1
5.7e-119	0.549717	0.508	0.156	8.76e-115	CD8T_c05-GZMK-GPR183	PECAM1
1.34e-116	0.462875	0.333	0.079	2.05e-112	CD8T_c05-GZMK-GPR183	PHACTR2
5.13e-116	0.887899	0.668	0.287	7.88e-112	CD8T_c05-GZMK-GPR183	CLDND1
1.23e-114	0.330936	0.222	0.039	1.89e-110	CD8T_c05-GZMK-GPR183	TNFAIP8L2
1.96e-114	0.748583	0.806	0.43	3.02e-110	CD8T_c05-GZMK-GPR183	GIMAP4
3.3e-114	0.699039	0.794	0.394	5.07e-110	CD8T_c05-GZMK-GPR183	TRAF3IP3
3.36e-113	0.760559	0.93	0.709	5.15e-109	CD8T_c05-GZMK-GPR183	S100A10
2.47e-111	0.617912	0.533	0.183	3.79e-107	CD8T_c05-GZMK-GPR183	RASGRP2
2.92e-111	0.745469	0.765	0.382	4.48e-107	CD8T_c05-GZMK-GPR183	YPEL3
6.71e-110	0.493172	0.987	0.944	1.03e-105	CD8T_c05-GZMK-GPR183	ARHGDIB
2.33e-109	0.504603	0.429	0.123	3.58e-105	CD8T_c05-GZMK-GPR183	TPP1
2.72e-109	0.404829	0.311	0.073	4.18e-105	CD8T_c05-GZMK-GPR183	GPKOW
3.96e-109	0.301836	0.216	0.039	6.07e-105	CD8T_c05-GZMK-GPR183	RTP4
6.13e-109	0.529654	0.262	0.056	9.41e-105	CD8T_c05-GZMK-GPR183	UBXN11
1.82e-108	0.258231	0.152	0.021	2.79e-104	CD8T_c05-GZMK-GPR183	TRAF3IP2
2.26e-108	0.466803	0.278	0.062	3.47e-104	CD8T_c05-GZMK-GPR183	ARMH1
4.71e-108	0.598041	0.671	0.28	7.24e-104	CD8T_c05-GZMK-GPR183	PPM1G
6.95e-108	0.392049	0.241	0.048	1.07e-103	CD8T_c05-GZMK-GPR183	MTSS1
1.14e-107	0.366612	0.203	0.036	1.75e-103	CD8T_c05-GZMK-GPR183	CPNE2
2.23e-104	0.573389	0.538	0.192	3.42e-100	CD8T_c05-GZMK-GPR183	GLRX
4.77e-104	0.290651	0.124	0.015	7.33e-100	CD8T_c05-GZMK-GPR183	MDS2
8.42e-103	0.31894	0.225	0.044	1.29e-98	CD8T_c05-GZMK-GPR183	CCNG2
4.58e-102	0.260122	0.148	0.021	7.02e-98	CD8T_c05-GZMK-GPR183	ZBTB32
5.72e-102	0.365566	0.27	0.06	8.79e-98	CD8T_c05-GZMK-GPR183	TSPOAP1-AS1
1.73e-101	0.562515	0.475	0.157	2.66e-97	CD8T_c05-GZMK-GPR183	GIMAP5
1.13e-100	0.668514	0.776	0.418	1.73e-96	CD8T_c05-GZMK-GPR183	LAT
1.53e-100	0.443542	0.376	0.103	2.35e-96	CD8T_c05-GZMK-GPR183	CD38
2.93e-100	0.535749	0.986	0.823	4.5e-96	CD8T_c05-GZMK-GPR183	CD52
3.73e-100	0.693954	0.643	0.28	5.73e-96	CD8T_c05-GZMK-GPR183	MRPS6
9.16e-100	0.496127	0.997	0.998	1.41e-95	CD8T_c05-GZMK-GPR183	ACTB
1.01e-99	0.554365	0.954	0.83	1.55e-95	CD8T_c05-GZMK-GPR183	RAC2
1.29e-98	0.488491	0.448	0.142	1.99e-94	CD8T_c05-GZMK-GPR183	CARHSP1
4.38e-98	0.678669	0.622	0.258	6.72e-94	CD8T_c05-GZMK-GPR183	AC004687.1
5.72e-97	0.712214	0.568	0.224	8.78e-93	CD8T_c05-GZMK-GPR183	CD81
2.42e-96	0.34323	0.244	0.053	3.72e-92	CD8T_c05-GZMK-GPR183	GPX7
6.02e-95	0.517361	0.979	0.878	9.24e-91	CD8T_c05-GZMK-GPR183	PTPRCAP
1.34e-94	0.424015	0.359	0.101	2.06e-90	CD8T_c05-GZMK-GPR183	FAM102A
2.98e-94	0.510668	0.554	0.21	4.57e-90	CD8T_c05-GZMK-GPR183	LSM2
1.03e-93	0.299184	0.186	0.034	1.58e-89	CD8T_c05-GZMK-GPR183	KLHL2
1.2e-93	0.400962	0.252	0.057	1.84e-89	CD8T_c05-GZMK-GPR183	CHI3L2
2.78e-93	0.512708	0.402	0.126	4.26e-89	CD8T_c05-GZMK-GPR183	CARS
1.93e-91	0.550318	0.789	0.417	2.96e-87	CD8T_c05-GZMK-GPR183	EID1
5.28e-90	0.293301	0.195	0.038	8.11e-86	CD8T_c05-GZMK-GPR183	GRK5
2.08e-89	0.536547	0.565	0.226	3.19e-85	CD8T_c05-GZMK-GPR183	CNIH1
3.02e-89	0.394155	0.302	0.079	4.63e-85	CD8T_c05-GZMK-GPR183	CRTC3
3.05e-89	0.618985	0.7	0.352	4.68e-85	CD8T_c05-GZMK-GPR183	PPP1R18
3.6e-89	0.572457	0.987	0.875	5.53e-85	CD8T_c05-GZMK-GPR183	CD74
2.25e-88	0.61399	0.667	0.308	3.45e-84	CD8T_c05-GZMK-GPR183	SH2D1A
2.62e-88	0.734286	0.667	0.333	4.03e-84	CD8T_c05-GZMK-GPR183	ANXA2
3.44e-88	0.577518	0.87	0.589	5.28e-84	CD8T_c05-GZMK-GPR183	GPSM3
1.25e-87	0.498102	0.87	0.524	1.92e-83	CD8T_c05-GZMK-GPR183	MT2A
1.72e-87	0.632007	0.683	0.345	2.64e-83	CD8T_c05-GZMK-GPR183	RGS10
2.09e-86	0.379701	0.233	0.053	3.21e-82	CD8T_c05-GZMK-GPR183	RPTOR
5.81e-86	0.472197	0.416	0.136	8.92e-82	CD8T_c05-GZMK-GPR183	EPSTI1
1.09e-85	0.412045	0.275	0.07	1.68e-81	CD8T_c05-GZMK-GPR183	MCM5
2.07e-85	0.593882	0.765	0.441	3.18e-81	CD8T_c05-GZMK-GPR183	ANP32B
6.08e-85	0.436909	0.375	0.115	9.33e-81	CD8T_c05-GZMK-GPR183	SLAMF6
1.63e-84	0.547919	0.892	0.644	2.5e-80	CD8T_c05-GZMK-GPR183	LCK
2.56e-84	0.444572	0.208	0.044	3.93e-80	CD8T_c05-GZMK-GPR183	TTN
1.93e-83	0.613039	0.621	0.286	2.97e-79	CD8T_c05-GZMK-GPR183	GIMAP1
3.69e-82	0.376467	0.275	0.071	5.67e-78	CD8T_c05-GZMK-GPR183	FAM45A
4.47e-82	0.451596	0.441	0.153	6.86e-78	CD8T_c05-GZMK-GPR183	GIMAP2
1.71e-80	0.52687	0.508	0.199	2.63e-76	CD8T_c05-GZMK-GPR183	HSPB11
3.64e-80	0.295966	0.167	0.032	5.59e-76	CD8T_c05-GZMK-GPR183	FLNB
5.25e-80	0.586014	0.586	0.262	8.06e-76	CD8T_c05-GZMK-GPR183	GBP2
9.22e-80	0.55991	0.662	0.317	1.41e-75	CD8T_c05-GZMK-GPR183	IL16
1.22e-79	0.479761	0.53	0.212	1.87e-75	CD8T_c05-GZMK-GPR183	IGBP1
2.59e-79	0.545151	0.538	0.221	3.98e-75	CD8T_c05-GZMK-GPR183	OGT
3.17e-79	0.270944	0.176	0.035	4.87e-75	CD8T_c05-GZMK-GPR183	GPR155
6.1e-79	0.383808	0.297	0.083	9.37e-75	CD8T_c05-GZMK-GPR183	LRMP
8.6e-79	0.465555	0.446	0.159	1.32e-74	CD8T_c05-GZMK-GPR183	CDKN2D
1.52e-78	0.309938	0.233	0.056	2.34e-74	CD8T_c05-GZMK-GPR183	PELI1
1.61e-78	0.564226	0.724	0.383	2.48e-74	CD8T_c05-GZMK-GPR183	TBC1D10C
3.5e-78	0.42546	0.443	0.158	5.38e-74	CD8T_c05-GZMK-GPR183	NDUFS2
4.07e-78	0.628004	0.635	0.322	6.25e-74	CD8T_c05-GZMK-GPR183	ZYX
4.18e-78	0.513586	0.622	0.281	6.42e-74	CD8T_c05-GZMK-GPR183	NAP1L4
4.37e-78	0.362114	0.297	0.083	6.71e-74	CD8T_c05-GZMK-GPR183	NFATC1
7.6e-78	0.277844	0.206	0.045	1.17e-73	CD8T_c05-GZMK-GPR183	TMEM156
1.92e-77	0.534034	0.714	0.365	2.94e-73	CD8T_c05-GZMK-GPR183	NDUFV2
4.07e-77	0.356042	0.992	0.949	6.26e-73	CD8T_c05-GZMK-GPR183	RACK1
1.23e-76	0.668092	0.725	0.423	1.89e-72	CD8T_c05-GZMK-GPR183	CSTB
2.4e-76	0.512734	0.506	0.2	3.68e-72	CD8T_c05-GZMK-GPR183	YWHAH
3.7e-76	0.383866	0.303	0.088	5.67e-72	CD8T_c05-GZMK-GPR183	LINC02273
1.77e-75	0.440811	0.352	0.112	2.72e-71	CD8T_c05-GZMK-GPR183	ANKRD10
2.57e-75	0.57088	0.616	0.271	3.95e-71	CD8T_c05-GZMK-GPR183	HLA-DRA
4.62e-75	0.439727	0.357	0.116	7.09e-71	CD8T_c05-GZMK-GPR183	THEM4
9.85e-75	0.38688	0.994	0.978	1.51e-70	CD8T_c05-GZMK-GPR183	TMSB10
1.02e-74	0.429006	0.467	0.172	1.57e-70	CD8T_c05-GZMK-GPR183	NT5C
1.16e-74	0.47787	0.93	0.788	1.79e-70	CD8T_c05-GZMK-GPR183	ATP5MC2
1.21e-74	0.523446	0.527	0.218	1.86e-70	CD8T_c05-GZMK-GPR183	STK38
3.86e-74	0.337989	0.297	0.085	5.93e-70	CD8T_c05-GZMK-GPR183	SLC25A46
5.03e-74	0.538976	0.722	0.387	7.73e-70	CD8T_c05-GZMK-GPR183	GTF3A
6.84e-74	0.468061	0.886	0.521	1.05e-69	CD8T_c05-GZMK-GPR183	KLF2
7.74e-74	0.398272	0.387	0.13	1.19e-69	CD8T_c05-GZMK-GPR183	GIMAP6
1.97e-73	0.527057	0.89	0.657	3.02e-69	CD8T_c05-GZMK-GPR183	FYB1
2.88e-73	0.558418	0.838	0.522	4.42e-69	CD8T_c05-GZMK-GPR183	GIMAP7
3.64e-73	0.398802	0.395	0.136	5.58e-69	CD8T_c05-GZMK-GPR183	ABTB1
6.66e-73	0.398754	0.975	0.889	1.02e-68	CD8T_c05-GZMK-GPR183	H3F3A
8.91e-73	0.335706	0.249	0.065	1.37e-68	CD8T_c05-GZMK-GPR183	TMEM245
1.4e-72	0.270986	0.157	0.03	2.15e-68	CD8T_c05-GZMK-GPR183	TBC1D4
3.38e-72	0.409228	0.37	0.124	5.19e-68	CD8T_c05-GZMK-GPR183	POP4
2.11e-71	0.53763	0.581	0.268	3.24e-67	CD8T_c05-GZMK-GPR183	LYAR
2.53e-71	0.306044	0.178	0.038	3.88e-67	CD8T_c05-GZMK-GPR183	SUN1
6.62e-71	0.453214	0.959	0.872	1.02e-66	CD8T_c05-GZMK-GPR183	CORO1A
1.07e-70	0.263531	0.162	0.033	1.64e-66	CD8T_c05-GZMK-GPR183	CASK
1.21e-70	0.479496	0.889	0.653	1.86e-66	CD8T_c05-GZMK-GPR183	CAPZB
2.16e-70	0.442003	0.576	0.245	3.32e-66	CD8T_c05-GZMK-GPR183	LYST
2.32e-70	0.379712	0.338	0.109	3.56e-66	CD8T_c05-GZMK-GPR183	RABEP1
4.06e-70	0.297185	0.294	0.086	6.23e-66	CD8T_c05-GZMK-GPR183	VPS25
4.11e-70	0.400272	0.356	0.117	6.32e-66	CD8T_c05-GZMK-GPR183	RAP1GDS1
1.75e-69	0.306263	0.256	0.07	2.68e-65	CD8T_c05-GZMK-GPR183	SVBP
4.98e-69	0.291965	0.143	0.027	7.65e-65	CD8T_c05-GZMK-GPR183	LINC00402
6.78e-69	0.326301	0.251	0.069	1.04e-64	CD8T_c05-GZMK-GPR183	KIAA0391
2.02e-68	0.423752	0.341	0.113	3.1e-64	CD8T_c05-GZMK-GPR183	PARP15
4.81e-68	0.27149	0.238	0.063	7.38e-64	CD8T_c05-GZMK-GPR183	ZNF580
6.06e-68	0.484185	0.667	0.345	9.31e-64	CD8T_c05-GZMK-GPR183	CSK
9.06e-68	0.34107	0.232	0.061	1.39e-63	CD8T_c05-GZMK-GPR183	SLC5A3
1.03e-67	0.342471	0.216	0.055	1.58e-63	CD8T_c05-GZMK-GPR183	NMT2
1.63e-66	0.421017	0.368	0.128	2.5e-62	CD8T_c05-GZMK-GPR183	MT1E
4.75e-66	0.360528	0.395	0.141	7.3e-62	CD8T_c05-GZMK-GPR183	MRPL16
5.99e-66	0.450353	0.463	0.189	9.19e-62	CD8T_c05-GZMK-GPR183	ANXA2R
4.46e-65	0.398388	0.386	0.138	6.85e-61	CD8T_c05-GZMK-GPR183	PACS1
6.57e-65	0.394046	0.456	0.179	1.01e-60	CD8T_c05-GZMK-GPR183	NECAP2
2.42e-64	0.272035	0.243	0.067	3.71e-60	CD8T_c05-GZMK-GPR183	IKBKE
2.62e-64	0.322501	0.297	0.092	4.03e-60	CD8T_c05-GZMK-GPR183	SHMT2
3.62e-64	0.429514	0.506	0.21	5.56e-60	CD8T_c05-GZMK-GPR183	CD28
6.2e-64	0.349047	0.352	0.12	9.51e-60	CD8T_c05-GZMK-GPR183	CHCHD5
7.03e-64	0.309718	0.273	0.08	1.08e-59	CD8T_c05-GZMK-GPR183	DTHD1
9.23e-64	0.415916	0.921	0.778	1.42e-59	CD8T_c05-GZMK-GPR183	ARPC3
2.54e-63	0.275119	0.189	0.045	3.91e-59	CD8T_c05-GZMK-GPR183	ATXN7L1
2.8e-62	0.488988	0.784	0.509	4.31e-58	CD8T_c05-GZMK-GPR183	PSMB8
4.18e-62	0.323871	0.29	0.091	6.42e-58	CD8T_c05-GZMK-GPR183	RUVBL1
8.79e-62	0.334346	0.316	0.104	1.35e-57	CD8T_c05-GZMK-GPR183	KLHDC3
9.25e-62	0.507712	0.627	0.328	1.42e-57	CD8T_c05-GZMK-GPR183	LIME1
1.07e-61	0.496792	0.727	0.406	1.65e-57	CD8T_c05-GZMK-GPR183	PNISR
3.43e-61	0.397928	0.513	0.221	5.26e-57	CD8T_c05-GZMK-GPR183	SIT1
6.47e-61	0.322931	0.279	0.086	9.94e-57	CD8T_c05-GZMK-GPR183	IBTK
3.44e-60	0.288209	0.268	0.081	5.28e-56	CD8T_c05-GZMK-GPR183	ACP5
5.11e-60	0.353053	0.387	0.144	7.84e-56	CD8T_c05-GZMK-GPR183	HACD4
1.01e-59	0.450162	0.671	0.34	1.55e-55	CD8T_c05-GZMK-GPR183	LINC00861
1.26e-59	0.471917	0.729	0.424	1.93e-55	CD8T_c05-GZMK-GPR183	ANXA11
1.4e-59	0.348069	0.351	0.125	2.16e-55	CD8T_c05-GZMK-GPR183	CARD8
1.91e-59	0.285844	0.241	0.07	2.94e-55	CD8T_c05-GZMK-GPR183	TXK
1.95e-59	0.517853	0.663	0.352	2.99e-55	CD8T_c05-GZMK-GPR183	SYNE2
2.5e-59	0.452982	0.638	0.332	3.84e-55	CD8T_c05-GZMK-GPR183	POLR1D
3.54e-59	0.475521	0.878	0.696	5.43e-55	CD8T_c05-GZMK-GPR183	ARPC1B
6.37e-59	0.337989	0.256	0.078	9.78e-55	CD8T_c05-GZMK-GPR183	BACH2
1.04e-58	0.452879	0.708	0.394	1.59e-54	CD8T_c05-GZMK-GPR183	NAP1L1
1.95e-58	0.279253	0.2	0.053	2.99e-54	CD8T_c05-GZMK-GPR183	PPTC7
2.27e-58	0.419279	0.489	0.213	3.49e-54	CD8T_c05-GZMK-GPR183	PIM2
7.29e-58	0.319241	0.99	0.938	1.12e-53	CD8T_c05-GZMK-GPR183	PPIA
1.7e-57	0.277263	0.237	0.069	2.61e-53	CD8T_c05-GZMK-GPR183	STK16
1.99e-57	0.366856	0.471	0.199	3.06e-53	CD8T_c05-GZMK-GPR183	DECR1
2.89e-57	0.403123	0.902	0.737	4.44e-53	CD8T_c05-GZMK-GPR183	SUMO2
4.39e-57	0.28709	0.227	0.065	6.74e-53	CD8T_c05-GZMK-GPR183	HDAC7
5.68e-57	0.428243	0.779	0.489	8.72e-53	CD8T_c05-GZMK-GPR183	C9orf16
8.54e-57	0.3931	0.476	0.209	1.31e-52	CD8T_c05-GZMK-GPR183	AQP3
1.01e-56	0.311928	0.259	0.08	1.55e-52	CD8T_c05-GZMK-GPR183	TACC3
1.04e-56	0.415729	0.584	0.284	1.6e-52	CD8T_c05-GZMK-GPR183	TNFAIP8
1.11e-56	0.476756	0.519	0.243	1.7e-52	CD8T_c05-GZMK-GPR183	RTN4
1.39e-56	0.348687	0.406	0.16	2.14e-52	CD8T_c05-GZMK-GPR183	RAD23B
1.67e-56	0.309665	0.378	0.141	2.57e-52	CD8T_c05-GZMK-GPR183	ITGAE
2.45e-56	0.267457	0.16	0.038	3.76e-52	CD8T_c05-GZMK-GPR183	DBN1
6.11e-56	0.389647	0.532	0.241	9.38e-52	CD8T_c05-GZMK-GPR183	ALKBH7
2.84e-55	0.411108	0.852	0.639	4.36e-51	CD8T_c05-GZMK-GPR183	COX6B1
3.07e-55	0.394484	0.943	0.833	4.71e-51	CD8T_c05-GZMK-GPR183	ARPC2
6.82e-55	0.42092	0.767	0.459	1.05e-50	CD8T_c05-GZMK-GPR183	TRAPPC1
1.46e-54	0.440534	0.894	0.725	2.25e-50	CD8T_c05-GZMK-GPR183	CLIC1
2.75e-54	0.30101	0.327	0.116	4.23e-50	CD8T_c05-GZMK-GPR183	GTF2H5
3.3e-54	0.341262	0.333	0.122	5.07e-50	CD8T_c05-GZMK-GPR183	ZCRB1
3.44e-54	0.433879	0.537	0.259	5.29e-50	CD8T_c05-GZMK-GPR183	DEF6
6.53e-54	0.338966	0.292	0.1	1e-49	CD8T_c05-GZMK-GPR183	MHENCR
7.38e-54	0.34382	0.417	0.17	1.13e-49	CD8T_c05-GZMK-GPR183	ETFB
1.42e-53	0.345661	0.313	0.111	2.17e-49	CD8T_c05-GZMK-GPR183	IPCEF1
2.15e-53	0.428321	0.667	0.375	3.31e-49	CD8T_c05-GZMK-GPR183	FKBP1A
2.47e-53	0.352549	0.47	0.202	3.79e-49	CD8T_c05-GZMK-GPR183	C11orf98
3.69e-53	0.42436	0.57	0.282	5.67e-49	CD8T_c05-GZMK-GPR183	POLD4
3.92e-53	0.454946	0.567	0.281	6.02e-49	CD8T_c05-GZMK-GPR183	MGAT4A
5.53e-53	0.326546	0.332	0.121	8.49e-49	CD8T_c05-GZMK-GPR183	PIK3R5
1.07e-52	0.339729	0.403	0.162	1.64e-48	CD8T_c05-GZMK-GPR183	MPG
1.18e-52	0.306096	0.195	0.055	1.82e-48	CD8T_c05-GZMK-GPR183	NBPF15
1.67e-52	0.460796	0.746	0.472	2.56e-48	CD8T_c05-GZMK-GPR183	2021-09-09
2.68e-52	0.372988	0.525	0.249	4.11e-48	CD8T_c05-GZMK-GPR183	AP2S1
2.68e-52	0.51108	0.23	0.073	4.12e-48	CD8T_c05-GZMK-GPR183	PASK
4.4e-52	0.296664	0.262	0.085	6.75e-48	CD8T_c05-GZMK-GPR183	ESYT2
7.52e-52	0.271877	0.341	0.125	1.15e-47	CD8T_c05-GZMK-GPR183	PFDN4
9.72e-52	0.282026	0.244	0.077	1.49e-47	CD8T_c05-GZMK-GPR183	TCEAL8
2.88e-51	0.389139	0.556	0.276	4.42e-47	CD8T_c05-GZMK-GPR183	PPP1CC
2.89e-51	0.279114	0.213	0.063	4.44e-47	CD8T_c05-GZMK-GPR183	FCGRT
3.64e-51	0.426482	0.737	0.44	5.59e-47	CD8T_c05-GZMK-GPR183	NDUFB9
8.35e-51	0.362619	0.935	0.771	1.28e-46	CD8T_c05-GZMK-GPR183	CD99
9.65e-51	0.286183	0.184	0.05	1.48e-46	CD8T_c05-GZMK-GPR183	E2F3
1.06e-50	0.403786	0.708	0.423	1.62e-46	CD8T_c05-GZMK-GPR183	COX5A
1.32e-50	0.292247	0.341	0.128	2.03e-46	CD8T_c05-GZMK-GPR183	UBL7
1.44e-50	0.473788	0.948	0.836	2.21e-46	CD8T_c05-GZMK-GPR183	S100A6
1.88e-50	0.339146	0.295	0.105	2.88e-46	CD8T_c05-GZMK-GPR183	HBS1L
1.96e-50	0.272284	0.243	0.077	3.02e-46	CD8T_c05-GZMK-GPR183	FMC1
3.14e-50	0.475517	0.379	0.157	4.82e-46	CD8T_c05-GZMK-GPR183	LRBA
3.24e-50	0.305737	0.327	0.123	4.98e-46	CD8T_c05-GZMK-GPR183	DNPH1
3.77e-50	0.360968	0.514	0.237	5.78e-46	CD8T_c05-GZMK-GPR183	WASF2
3.91e-50	0.338605	0.378	0.152	6e-46	CD8T_c05-GZMK-GPR183	HMGA1
4.57e-50	0.426764	0.61	0.326	7.02e-46	CD8T_c05-GZMK-GPR183	ZNF706
4.93e-50	0.311106	0.338	0.127	7.57e-46	CD8T_c05-GZMK-GPR183	PTEN
5.74e-50	0.411018	0.646	0.363	8.82e-46	CD8T_c05-GZMK-GPR183	ATP5F1C
6.5e-50	0.387022	0.562	0.281	9.98e-46	CD8T_c05-GZMK-GPR183	BIN1
8.27e-50	0.404816	0.573	0.287	1.27e-45	CD8T_c05-GZMK-GPR183	ATM
8.44e-50	0.312779	0.221	0.068	1.3e-45	CD8T_c05-GZMK-GPR183	CENPK
9.32e-50	0.366805	0.494	0.228	1.43e-45	CD8T_c05-GZMK-GPR183	OXA1L
1.63e-49	0.343299	0.444	0.192	2.51e-45	CD8T_c05-GZMK-GPR183	CLPP
1.68e-49	0.437041	0.695	0.416	2.57e-45	CD8T_c05-GZMK-GPR183	SH3BGRL
5.1e-49	0.424305	0.537	0.268	7.83e-45	CD8T_c05-GZMK-GPR183	TAF10
6.75e-49	0.392015	0.9	0.731	1.04e-44	CD8T_c05-GZMK-GPR183	CD37
6.76e-49	0.254845	0.267	0.09	1.04e-44	CD8T_c05-GZMK-GPR183	OXLD1
9.28e-49	0.345757	0.284	0.101	1.42e-44	CD8T_c05-GZMK-GPR183	STK26
1.37e-48	0.327103	0.292	0.106	2.11e-44	CD8T_c05-GZMK-GPR183	TRIM69
1.76e-48	0.452896	0.69	0.43	2.7e-44	CD8T_c05-GZMK-GPR183	ARPC5
1.79e-48	0.38766	0.57	0.291	2.75e-44	CD8T_c05-GZMK-GPR183	OCIAD2
2e-48	0.278554	0.508	0.226	3.08e-44	CD8T_c05-GZMK-GPR183	FABP5
2.1e-48	0.292618	0.249	0.082	3.23e-44	CD8T_c05-GZMK-GPR183	EXOSC9
2.41e-48	0.340337	0.341	0.134	3.7e-44	CD8T_c05-GZMK-GPR183	DNAJC4
2.58e-48	0.382764	0.589	0.305	3.97e-44	CD8T_c05-GZMK-GPR183	C8orf59
2.83e-48	0.403803	0.805	0.553	4.35e-44	CD8T_c05-GZMK-GPR183	HIGD2A
4.18e-48	0.317879	0.402	0.167	6.41e-44	CD8T_c05-GZMK-GPR183	RGS19
4.6e-48	0.261244	0.295	0.105	7.07e-44	CD8T_c05-GZMK-GPR183	CCDC28A
5.27e-48	0.347313	0.411	0.176	8.09e-44	CD8T_c05-GZMK-GPR183	SSH2
6.02e-48	0.266898	0.281	0.098	9.24e-44	CD8T_c05-GZMK-GPR183	CTSB
1.26e-47	0.353653	0.432	0.187	1.93e-43	CD8T_c05-GZMK-GPR183	RCAN3
1.3e-47	0.3493	0.397	0.168	2e-43	CD8T_c05-GZMK-GPR183	S1PR1
2.31e-47	0.380565	0.552	0.269	3.55e-43	CD8T_c05-GZMK-GPR183	IKZF3
2.74e-47	0.309456	0.419	0.179	4.2e-43	CD8T_c05-GZMK-GPR183	MRPL34
2.77e-47	0.306296	0.271	0.096	4.25e-43	CD8T_c05-GZMK-GPR183	CALCOCO1
5.09e-47	0.388627	0.557	0.288	7.82e-43	CD8T_c05-GZMK-GPR183	AIP
6.96e-47	0.384423	0.554	0.275	1.07e-42	CD8T_c05-GZMK-GPR183	SEMA4D
1.7e-46	0.360657	0.522	0.253	2.61e-42	CD8T_c05-GZMK-GPR183	KIF2A
1.74e-46	0.385514	0.703	0.415	2.67e-42	CD8T_c05-GZMK-GPR183	SELENOH
1.83e-46	0.324503	0.383	0.158	2.81e-42	CD8T_c05-GZMK-GPR183	YBX3
2.43e-46	0.301885	0.386	0.16	3.73e-42	CD8T_c05-GZMK-GPR183	NUDT5
3.17e-46	0.262385	0.251	0.085	4.86e-42	CD8T_c05-GZMK-GPR183	ARHGAP1
6.28e-46	0.375573	0.851	0.623	9.63e-42	CD8T_c05-GZMK-GPR183	EVL
1.14e-45	0.394154	0.797	0.548	1.74e-41	CD8T_c05-GZMK-GPR183	PPP1CA
1.18e-45	0.262806	0.246	0.083	1.81e-41	CD8T_c05-GZMK-GPR183	SH3YL1
1.18e-45	0.28406	0.281	0.101	1.82e-41	CD8T_c05-GZMK-GPR183	TMEM131L
1.21e-45	0.285062	0.384	0.159	1.86e-41	CD8T_c05-GZMK-GPR183	LAMTOR2
1.24e-45	0.30988	0.971	0.88	1.9e-41	CD8T_c05-GZMK-GPR183	BTF3
1.79e-45	0.286958	0.279	0.101	2.75e-41	CD8T_c05-GZMK-GPR183	DMAC1
2.23e-45	0.33086	0.484	0.228	3.42e-41	CD8T_c05-GZMK-GPR183	PGLS
2.83e-45	0.299377	0.259	0.091	4.34e-41	CD8T_c05-GZMK-GPR183	UXS1
2.83e-45	0.35891	0.403	0.175	4.35e-41	CD8T_c05-GZMK-GPR183	FLOT2
3.2e-45	0.278692	0.265	0.094	4.91e-41	CD8T_c05-GZMK-GPR183	BEX4
4.62e-45	0.282686	0.978	0.918	7.1e-41	CD8T_c05-GZMK-GPR183	SERF2
4.84e-45	0.384495	0.817	0.562	7.44e-41	CD8T_c05-GZMK-GPR183	EIF3G
6.07e-45	0.393812	0.737	0.455	9.32e-41	CD8T_c05-GZMK-GPR183	GNG5
8.55e-45	0.2939	0.975	0.896	1.31e-40	CD8T_c05-GZMK-GPR183	MYL12A
1.08e-44	0.359415	0.546	0.272	1.65e-40	CD8T_c05-GZMK-GPR183	SCAMP2
1.16e-44	0.484098	0.644	0.378	1.79e-40	CD8T_c05-GZMK-GPR183	CAST
1.21e-44	0.353218	0.359	0.151	1.87e-40	CD8T_c05-GZMK-GPR183	PABPN1
1.34e-44	0.314858	0.417	0.184	2.06e-40	CD8T_c05-GZMK-GPR183	NDUFB5
2.17e-44	0.258821	0.271	0.097	3.33e-40	CD8T_c05-GZMK-GPR183	B4GALT3
2.21e-44	0.348286	0.533	0.266	3.39e-40	CD8T_c05-GZMK-GPR183	TWF2
2.37e-44	0.344301	0.468	0.222	3.64e-40	CD8T_c05-GZMK-GPR183	TKT
3.53e-44	0.286318	0.289	0.108	5.41e-40	CD8T_c05-GZMK-GPR183	ZC3H7A
3.64e-44	0.275377	0.367	0.151	5.59e-40	CD8T_c05-GZMK-GPR183	URM1
4.63e-44	0.394889	0.576	0.308	7.1e-40	CD8T_c05-GZMK-GPR183	TPR
8.04e-44	0.288597	0.957	0.859	1.23e-39	CD8T_c05-GZMK-GPR183	CD3D
1.1e-43	0.298625	0.352	0.145	1.68e-39	CD8T_c05-GZMK-GPR183	PLSCR3
2.18e-43	0.349907	0.578	0.301	3.34e-39	CD8T_c05-GZMK-GPR183	CBLB
2.34e-43	0.303331	0.289	0.109	3.6e-39	CD8T_c05-GZMK-GPR183	HIST1H1C
2.84e-43	0.273975	0.316	0.124	4.37e-39	CD8T_c05-GZMK-GPR183	MTIF3
4.71e-43	0.312393	0.289	0.11	7.23e-39	CD8T_c05-GZMK-GPR183	UBALD2
5.34e-43	0.320853	0.402	0.174	8.2e-39	CD8T_c05-GZMK-GPR183	HLA-DMA
5.76e-43	0.281956	0.317	0.125	8.84e-39	CD8T_c05-GZMK-GPR183	CNTRL
7.94e-43	0.347517	0.397	0.178	1.22e-38	CD8T_c05-GZMK-GPR183	SYPL1
1.85e-42	0.35668	0.633	0.356	2.84e-38	CD8T_c05-GZMK-GPR183	MRPS21
2.24e-42	0.321813	0.502	0.245	3.43e-38	CD8T_c05-GZMK-GPR183	ARHGAP45
2.64e-42	0.264968	0.359	0.148	4.06e-38	CD8T_c05-GZMK-GPR183	PNKD
7.49e-42	0.353731	0.559	0.291	1.15e-37	CD8T_c05-GZMK-GPR183	ARRB2
9.19e-42	0.352773	0.875	0.652	1.41e-37	CD8T_c05-GZMK-GPR183	GABARAP
1.65e-41	0.370245	0.627	0.363	2.53e-37	CD8T_c05-GZMK-GPR183	CHURC1
1.99e-41	0.357672	0.652	0.376	3.05e-37	CD8T_c05-GZMK-GPR183	ATP5PD
2e-41	0.299956	0.476	0.226	3.07e-37	CD8T_c05-GZMK-GPR183	MIEN1
2.27e-41	0.253275	0.368	0.155	3.49e-37	CD8T_c05-GZMK-GPR183	FAM96A
4.1e-41	0.373248	0.806	0.579	6.3e-37	CD8T_c05-GZMK-GPR183	RNASEK
5.26e-41	0.255031	0.262	0.096	8.08e-37	CD8T_c05-GZMK-GPR183	TRAF5
5.28e-41	0.274751	0.349	0.146	8.11e-37	CD8T_c05-GZMK-GPR183	MED15
6.23e-41	0.352094	0.608	0.343	9.56e-37	CD8T_c05-GZMK-GPR183	NDUFA12
6.25e-41	0.266058	0.997	0.988	9.6e-37	CD8T_c05-GZMK-GPR183	MT-CO3
1.06e-40	0.273181	0.297	0.117	1.63e-36	CD8T_c05-GZMK-GPR183	MSL3
1.57e-40	0.315148	0.348	0.148	2.41e-36	CD8T_c05-GZMK-GPR183	TMEM134
1.78e-40	0.289424	0.294	0.115	2.73e-36	CD8T_c05-GZMK-GPR183	BRI3
2.09e-40	0.360934	0.752	0.476	3.21e-36	CD8T_c05-GZMK-GPR183	CD247
3.41e-40	0.353634	0.524	0.268	5.23e-36	CD8T_c05-GZMK-GPR183	PIK3IP1
4.6e-40	0.313125	0.594	0.318	7.05e-36	CD8T_c05-GZMK-GPR183	DYNLRB1
5.92e-40	0.35555	0.765	0.502	9.09e-36	CD8T_c05-GZMK-GPR183	UBXN1
1.1e-39	0.338087	0.592	0.327	1.69e-35	CD8T_c05-GZMK-GPR183	OPTN
1.17e-39	0.303281	0.317	0.13	1.79e-35	CD8T_c05-GZMK-GPR183	TPP2
1.35e-39	0.266436	0.321	0.131	2.07e-35	CD8T_c05-GZMK-GPR183	ELMO1
1.48e-39	0.350514	0.571	0.313	2.27e-35	CD8T_c05-GZMK-GPR183	TRAC
1.87e-39	0.263774	0.271	0.103	2.87e-35	CD8T_c05-GZMK-GPR183	MDM4
2.24e-39	0.345765	0.711	0.427	3.44e-35	CD8T_c05-GZMK-GPR183	RHOH
2.55e-39	0.315942	0.494	0.245	3.91e-35	CD8T_c05-GZMK-GPR183	GRK6
3.38e-39	0.264433	0.267	0.101	5.19e-35	CD8T_c05-GZMK-GPR183	ECI2
3.51e-39	0.29838	0.371	0.163	5.39e-35	CD8T_c05-GZMK-GPR183	SPAG7
4.11e-39	0.375	0.287	0.115	6.31e-35	CD8T_c05-GZMK-GPR183	HIST1H1D
4.49e-39	0.339554	0.603	0.34	6.89e-35	CD8T_c05-GZMK-GPR183	NOP10
9.28e-39	0.305528	0.508	0.253	1.42e-34	CD8T_c05-GZMK-GPR183	ARHGAP30
1.34e-38	0.345174	0.673	0.409	2.05e-34	CD8T_c05-GZMK-GPR183	EIF3M
1.57e-38	0.340405	0.849	0.642	2.4e-34	CD8T_c05-GZMK-GPR183	EIF3F
3.16e-38	0.308075	0.471	0.232	4.85e-34	CD8T_c05-GZMK-GPR183	STMP1
3.16e-38	0.347829	0.651	0.393	4.85e-34	CD8T_c05-GZMK-GPR183	RTRAF
3.7e-38	0.292442	0.463	0.224	5.69e-34	CD8T_c05-GZMK-GPR183	H2AFY
3.75e-38	0.343997	0.537	0.287	5.76e-34	CD8T_c05-GZMK-GPR183	GRB2
3.9e-38	0.341264	0.467	0.233	5.99e-34	CD8T_c05-GZMK-GPR183	CCSER2
6.01e-38	0.342907	0.698	0.435	9.22e-34	CD8T_c05-GZMK-GPR183	RHOG
6.32e-38	0.257014	0.292	0.117	9.7e-34	CD8T_c05-GZMK-GPR183	CD84
1.24e-37	0.288551	0.354	0.156	1.91e-33	CD8T_c05-GZMK-GPR183	FGD3
2.18e-37	0.340435	0.562	0.312	3.34e-33	CD8T_c05-GZMK-GPR183	COX7A2L
2.54e-37	0.321755	0.448	0.22	3.9e-33	CD8T_c05-GZMK-GPR183	SNRPA
3.04e-37	0.317396	0.389	0.179	4.67e-33	CD8T_c05-GZMK-GPR183	PCSK7
3.25e-37	0.27199	0.335	0.144	5e-33	CD8T_c05-GZMK-GPR183	NLRC5
3.75e-37	0.359211	0.714	0.465	5.76e-33	CD8T_c05-GZMK-GPR183	ARL4C
5.77e-37	0.272028	0.346	0.151	8.85e-33	CD8T_c05-GZMK-GPR183	NSMCE1
6.37e-37	0.313056	0.848	0.606	9.78e-33	CD8T_c05-GZMK-GPR183	COX5B
8.61e-37	0.286922	0.484	0.243	1.32e-32	CD8T_c05-GZMK-GPR183	TXNL1
8.67e-37	0.348594	0.673	0.408	1.33e-32	CD8T_c05-GZMK-GPR183	ARHGEF1
8.94e-37	0.299693	0.483	0.242	1.37e-32	CD8T_c05-GZMK-GPR183	ZNHIT1
1.02e-36	0.287019	0.441	0.212	1.57e-32	CD8T_c05-GZMK-GPR183	TMC8
1.4e-36	0.324051	0.678	0.417	2.16e-32	CD8T_c05-GZMK-GPR183	SEM1
2.08e-36	0.34053	0.733	0.482	3.2e-32	CD8T_c05-GZMK-GPR183	ATP5IF1
2.82e-36	0.284112	0.408	0.192	4.32e-32	CD8T_c05-GZMK-GPR183	DNMT1
2.84e-36	0.259706	0.154	0.046	4.36e-32	CD8T_c05-GZMK-GPR183	AC008105.3
2.93e-36	0.352286	0.619	0.366	4.5e-32	CD8T_c05-GZMK-GPR183	LAMTOR4
3.38e-36	0.276537	0.476	0.236	5.2e-32	CD8T_c05-GZMK-GPR183	MRPS34
4.78e-36	0.274071	0.406	0.19	7.34e-32	CD8T_c05-GZMK-GPR183	PARVG
1.12e-35	0.263896	0.276	0.111	1.73e-31	CD8T_c05-GZMK-GPR183	GRK2
1.66e-35	0.266151	0.419	0.201	2.54e-31	CD8T_c05-GZMK-GPR183	FDFT1
2.16e-35	0.277124	0.414	0.198	3.31e-31	CD8T_c05-GZMK-GPR183	PHF11
2.34e-35	0.368636	0.679	0.416	3.59e-31	CD8T_c05-GZMK-GPR183	PPP2R5C
2.7e-35	0.284721	0.292	0.123	4.15e-31	CD8T_c05-GZMK-GPR183	LDLRAP1
3.16e-35	0.349452	0.744	0.523	4.85e-31	CD8T_c05-GZMK-GPR183	ATP5MC3
3.25e-35	0.286916	0.463	0.233	4.98e-31	CD8T_c05-GZMK-GPR183	RBCK1
3.61e-35	0.323184	0.465	0.238	5.53e-31	CD8T_c05-GZMK-GPR183	EPB41
4.29e-35	0.259257	0.302	0.127	6.59e-31	CD8T_c05-GZMK-GPR183	MAPKAPK5-AS1
4.4e-35	0.252214	0.225	0.084	6.76e-31	CD8T_c05-GZMK-GPR183	ING4
4.82e-35	0.363841	0.275	0.112	7.4e-31	CD8T_c05-GZMK-GPR183	PMAIP1
5.29e-35	0.290555	0.395	0.187	8.12e-31	CD8T_c05-GZMK-GPR183	ATG3
9.87e-35	0.381999	0.537	0.302	1.52e-30	CD8T_c05-GZMK-GPR183	EIF3A
1.48e-34	0.318833	0.795	0.552	2.27e-30	CD8T_c05-GZMK-GPR183	EIF3H
1.61e-34	0.25263	0.297	0.125	2.47e-30	CD8T_c05-GZMK-GPR183	CNST
2.21e-34	0.30414	0.652	0.391	3.39e-30	CD8T_c05-GZMK-GPR183	RBX1
3.09e-34	0.26626	0.422	0.205	4.75e-30	CD8T_c05-GZMK-GPR183	PYCARD
4.23e-34	0.305774	0.498	0.261	6.49e-30	CD8T_c05-GZMK-GPR183	PTPN6
4.28e-34	0.317663	0.556	0.307	6.57e-30	CD8T_c05-GZMK-GPR183	TNFRSF14
4.78e-34	0.323443	0.448	0.232	7.34e-30	CD8T_c05-GZMK-GPR183	TMEM256
6.91e-34	0.301218	0.535	0.288	1.06e-29	CD8T_c05-GZMK-GPR183	PDCD6
7.51e-34	0.256344	0.211	0.078	1.15e-29	CD8T_c05-GZMK-GPR183	BEX2
8.96e-34	0.318418	0.724	0.48	1.38e-29	CD8T_c05-GZMK-GPR183	CUTA
9.17e-34	0.275598	0.425	0.208	1.41e-29	CD8T_c05-GZMK-GPR183	BCL11B
1.2e-33	0.340229	0.683	0.433	1.84e-29	CD8T_c05-GZMK-GPR183	ARF5
1.29e-33	0.280001	0.421	0.208	1.97e-29	CD8T_c05-GZMK-GPR183	MRPS24
1.54e-33	0.293088	0.471	0.244	2.37e-29	CD8T_c05-GZMK-GPR183	SP110
1.71e-33	0.257098	0.314	0.136	2.63e-29	CD8T_c05-GZMK-GPR183	NEK7
2.13e-33	0.259493	0.257	0.104	3.27e-29	CD8T_c05-GZMK-GPR183	PPP6R2
2.72e-33	0.26309	0.429	0.208	4.17e-29	CD8T_c05-GZMK-GPR183	SDHA
2.85e-33	0.271929	0.506	0.266	4.38e-29	CD8T_c05-GZMK-GPR183	SYNRG
3.05e-33	0.303432	0.5	0.265	4.69e-29	CD8T_c05-GZMK-GPR183	IFI16
3.14e-33	0.290417	0.565	0.312	4.82e-29	CD8T_c05-GZMK-GPR183	PITPNC1
3.67e-33	0.308304	0.86	0.709	5.63e-29	CD8T_c05-GZMK-GPR183	PCBP1
7.44e-33	0.3308	0.792	0.54	1.14e-28	CD8T_c05-GZMK-GPR183	ETS1
9.35e-33	0.275298	0.34	0.155	1.44e-28	CD8T_c05-GZMK-GPR183	BRWD1
1.27e-32	0.260804	0.437	0.217	1.96e-28	CD8T_c05-GZMK-GPR183	POLR2G
2.02e-32	0.256592	0.379	0.18	3.1e-28	CD8T_c05-GZMK-GPR183	MFNG
2.59e-32	0.259445	0.205	0.076	3.98e-28	CD8T_c05-GZMK-GPR183	CUX1
3.44e-32	0.265199	0.465	0.238	5.28e-28	CD8T_c05-GZMK-GPR183	FAAP20
3.78e-32	0.277687	0.449	0.23	5.8e-28	CD8T_c05-GZMK-GPR183	DGKZ
4.25e-32	0.270317	0.446	0.228	6.52e-28	CD8T_c05-GZMK-GPR183	NDUFB3
4.37e-32	0.282133	0.308	0.135	6.71e-28	CD8T_c05-GZMK-GPR183	SAMD9
7.49e-32	0.271283	0.386	0.188	1.15e-27	CD8T_c05-GZMK-GPR183	RASA3
8.2e-32	0.295712	0.459	0.238	1.26e-27	CD8T_c05-GZMK-GPR183	HNRNPD
8.44e-32	0.279174	0.602	0.354	1.3e-27	CD8T_c05-GZMK-GPR183	SELPLG
9.67e-32	0.251612	0.298	0.13	1.49e-27	CD8T_c05-GZMK-GPR183	PTK2B
1.06e-31	0.279344	0.484	0.255	1.62e-27	CD8T_c05-GZMK-GPR183	GLG1
1.19e-31	0.261642	0.225	0.087	1.82e-27	CD8T_c05-GZMK-GPR183	PARP4
1.24e-31	0.292116	0.511	0.281	1.91e-27	CD8T_c05-GZMK-GPR183	RBBP4
1.28e-31	0.261255	0.494	0.262	1.96e-27	CD8T_c05-GZMK-GPR183	LAMTOR1
1.45e-31	0.269687	0.479	0.254	2.23e-27	CD8T_c05-GZMK-GPR183	MRPL51
1.67e-31	0.294437	0.548	0.311	2.57e-27	CD8T_c05-GZMK-GPR183	NDUFA2
1.69e-31	0.25297	0.383	0.184	2.59e-27	CD8T_c05-GZMK-GPR183	EIF4E2
1.7e-31	0.274243	0.665	0.404	2.61e-27	CD8T_c05-GZMK-GPR183	TUBB
2.38e-31	0.322417	0.713	0.477	3.65e-27	CD8T_c05-GZMK-GPR183	ARL6IP4
2.8e-31	0.300538	0.79	0.546	4.3e-27	CD8T_c05-GZMK-GPR183	UQCR10
2.9e-31	0.261215	0.362	0.172	4.46e-27	CD8T_c05-GZMK-GPR183	RASGRP1
3.73e-31	0.373383	0.621	0.385	5.73e-27	CD8T_c05-GZMK-GPR183	SMCHD1
3.79e-31	0.279509	0.617	0.366	5.81e-27	CD8T_c05-GZMK-GPR183	TSPO
3.95e-31	0.268979	0.484	0.258	6.07e-27	CD8T_c05-GZMK-GPR183	NRBP1
6.58e-31	0.305073	0.595	0.351	1.01e-26	CD8T_c05-GZMK-GPR183	CDC42SE1
7.05e-31	0.261421	0.319	0.145	1.08e-26	CD8T_c05-GZMK-GPR183	CHD4
7.19e-31	0.256151	0.397	0.196	1.1e-26	CD8T_c05-GZMK-GPR183	PPP1R7
8.5e-31	0.263959	0.406	0.203	1.3e-26	CD8T_c05-GZMK-GPR183	RNF126
9.62e-31	0.255812	0.489	0.258	1.48e-26	CD8T_c05-GZMK-GPR183	MAF1
9.94e-31	0.259002	0.451	0.235	1.53e-26	CD8T_c05-GZMK-GPR183	PARP1
1.1e-30	0.312719	0.735	0.495	1.69e-26	CD8T_c05-GZMK-GPR183	ATP5MF
1.11e-30	0.312926	0.681	0.441	1.71e-26	CD8T_c05-GZMK-GPR183	H2AFV
1.38e-30	0.311671	0.651	0.416	2.12e-26	CD8T_c05-GZMK-GPR183	NDUFB4
2.01e-30	0.314214	0.633	0.395	3.08e-26	CD8T_c05-GZMK-GPR183	UFC1
2.1e-30	0.274571	0.451	0.234	3.23e-26	CD8T_c05-GZMK-GPR183	CPNE1
3.21e-30	0.265292	0.449	0.235	4.93e-26	CD8T_c05-GZMK-GPR183	SNX17
4.53e-30	0.309093	0.673	0.442	6.96e-26	CD8T_c05-GZMK-GPR183	WDR1
5.36e-30	0.274401	0.425	0.217	8.24e-26	CD8T_c05-GZMK-GPR183	PIN1
5.6e-30	0.289555	0.584	0.34	8.6e-26	CD8T_c05-GZMK-GPR183	FIS1
6.15e-30	0.263284	0.43	0.22	9.44e-26	CD8T_c05-GZMK-GPR183	CCDC88C
7.34e-30	0.276755	0.781	0.549	1.13e-25	CD8T_c05-GZMK-GPR183	WIPF1
7.47e-30	0.252226	0.46	0.239	1.15e-25	CD8T_c05-GZMK-GPR183	EAPP
7.51e-30	0.293248	0.576	0.342	1.15e-25	CD8T_c05-GZMK-GPR183	MDH2
7.56e-30	0.295911	0.633	0.393	1.16e-25	CD8T_c05-GZMK-GPR183	CSNK2B
8.13e-30	0.258234	0.481	0.256	1.25e-25	CD8T_c05-GZMK-GPR183	HMOX2
8.32e-30	0.274332	0.478	0.258	1.28e-25	CD8T_c05-GZMK-GPR183	CBX3
1.06e-29	0.280503	0.494	0.268	1.63e-25	CD8T_c05-GZMK-GPR183	LUC7L3
1.33e-29	0.324133	0.659	0.416	2.05e-25	CD8T_c05-GZMK-GPR183	DDX17
1.73e-29	0.279645	0.66	0.415	2.66e-25	CD8T_c05-GZMK-GPR183	BIN2
3.95e-29	0.275461	0.5	0.275	6.06e-25	CD8T_c05-GZMK-GPR183	CNPY3
4.52e-29	0.290539	0.665	0.434	6.93e-25	CD8T_c05-GZMK-GPR183	ATP5PB
4.81e-29	0.291658	0.751	0.506	7.39e-25	CD8T_c05-GZMK-GPR183	UBE2D2
4.89e-29	0.307714	0.67	0.433	7.51e-25	CD8T_c05-GZMK-GPR183	FKBP8
5.47e-29	0.254441	0.387	0.194	8.4e-25	CD8T_c05-GZMK-GPR183	SLC44A2
1.59e-28	0.349244	0.702	0.474	2.45e-24	CD8T_c05-GZMK-GPR183	FLNA
2.44e-28	0.275515	0.64	0.395	3.75e-24	CD8T_c05-GZMK-GPR183	RAC1
2.56e-28	0.257884	0.586	0.344	3.92e-24	CD8T_c05-GZMK-GPR183	ATP6V1F
3.15e-28	0.265819	0.652	0.415	4.84e-24	CD8T_c05-GZMK-GPR183	CLEC2D
5.6e-28	0.297824	0.602	0.392	8.6e-24	CD8T_c05-GZMK-GPR183	ATP5F1A
6.91e-28	0.257165	0.441	0.235	1.06e-23	CD8T_c05-GZMK-GPR183	P2RY8
9.58e-28	0.255777	0.502	0.276	1.47e-23	CD8T_c05-GZMK-GPR183	UTRN
2.84e-27	0.252781	0.338	0.163	4.37e-23	CD8T_c05-GZMK-GPR183	PREX1
6.31e-27	0.267821	0.644	0.412	9.69e-23	CD8T_c05-GZMK-GPR183	GNB2
1.6e-26	0.270461	0.544	0.328	2.45e-22	CD8T_c05-GZMK-GPR183	LPXN
2.53e-26	0.256296	0.608	0.374	3.89e-22	CD8T_c05-GZMK-GPR183	NDUFB10
2.62e-26	0.281909	0.749	0.529	4.03e-22	CD8T_c05-GZMK-GPR183	ATP5F1D
2.76e-26	0.288007	0.73	0.503	4.24e-22	CD8T_c05-GZMK-GPR183	SLC9A3R1
3.87e-26	0.283312	0.679	0.449	5.94e-22	CD8T_c05-GZMK-GPR183	CALM3
3.99e-26	0.26855	0.579	0.353	6.13e-22	CD8T_c05-GZMK-GPR183	SYF2
4.24e-26	0.281405	0.66	0.441	6.5e-22	CD8T_c05-GZMK-GPR183	ATP5MPL
5.33e-26	0.288787	0.689	0.481	8.18e-22	CD8T_c05-GZMK-GPR183	BRK1
6.91e-26	0.251594	0.34	0.17	1.06e-21	CD8T_c05-GZMK-GPR183	ESYT1
7.12e-26	0.314746	0.257	0.116	1.09e-21	CD8T_c05-GZMK-GPR183	MX1
1.03e-25	0.258021	0.456	0.255	1.59e-21	CD8T_c05-GZMK-GPR183	TMEM219
1.17e-25	0.269336	0.711	0.494	1.8e-21	CD8T_c05-GZMK-GPR183	DRAP1
2.7e-25	0.251771	0.54	0.315	4.14e-21	CD8T_c05-GZMK-GPR183	NSD3
3.65e-25	0.258141	0.881	0.656	5.61e-21	CD8T_c05-GZMK-GPR183	EMP3
2.33e-24	0.306443	0.871	0.743	3.58e-20	CD8T_c05-GZMK-GPR183	SUB1
2.43e-24	0.251154	0.53	0.317	3.73e-20	CD8T_c05-GZMK-GPR183	TSTD1
3.32e-24	0.254698	0.624	0.398	5.09e-20	CD8T_c05-GZMK-GPR183	UQCRFS1
4.45e-24	0.295915	0.717	0.53	6.83e-20	CD8T_c05-GZMK-GPR183	SLC25A5
5.9e-24	0.257422	0.603	0.386	9.06e-20	CD8T_c05-GZMK-GPR183	SRP9
4.98e-22	0.270177	0.857	0.673	7.64e-18	CD8T_c05-GZMK-GPR183	C12orf57
9.09e-22	0.368918	0.459	0.272	1.4e-17	CD8T_c05-GZMK-GPR183	ITGB1
6.79e-21	0.260501	0.449	0.265	1.04e-16	CD8T_c05-GZMK-GPR183	MACF1
1.3e-20	0.250017	0.503	0.308	1.99e-16	CD8T_c05-GZMK-GPR183	NDUFB1
7.83e-20	0.329335	0.398	0.232	1.2e-15	CD8T_c05-GZMK-GPR183	HIST1H1E
8.47e-20	0.32977	0.489	0.307	1.3e-15	CD8T_c05-GZMK-GPR183	H1FX
9.02e-20	0.256012	0.781	0.582	1.38e-15	CD8T_c05-GZMK-GPR183	SRSF5
1.38e-19	0.274451	0.775	0.593	2.12e-15	CD8T_c05-GZMK-GPR183	MYH9
1.22e-18	0.253565	0.6	0.401	1.88e-14	CD8T_c05-GZMK-GPR183	ITGA4
7.46e-16	0.268225	0.741	0.565	1.15e-11	CD8T_c05-GZMK-GPR183	HMGN2
1.45e-15	0.271397	0.303	0.172	2.23e-11	CD8T_c05-GZMK-GPR183	IFI6
6.91e-15	0.325735	0.344	0.217	1.06e-10	CD8T_c05-GZMK-GPR183	PLAC8
1.65e-12	0.585846	0.113	0.052	2.53e-08	CD8T_c05-GZMK-GPR183	TRAV14DV4
0	2.0582	0.423	0.171	0	CD8T_c06-GZMK-IFNG	CCL4L2
0	1.89862	0.605	0.138	0	CD8T_c06-GZMK-IFNG	HSPA1B
0	1.87015	0.794	0.181	0	CD8T_c06-GZMK-IFNG	FOSB
0	1.7462	0.786	0.583	0	CD8T_c06-GZMK-IFNG	CCL4
0	1.74258	0.554	0.201	0	CD8T_c06-GZMK-IFNG	HSPA1A
0	1.70242	0.844	0.311	0	CD8T_c06-GZMK-IFNG	FOS
0	1.61925	0.911	0.586	0	CD8T_c06-GZMK-IFNG	DNAJB1
0	1.52502	0.914	0.526	0	CD8T_c06-GZMK-IFNG	DNAJA1
0	1.47004	0.907	0.503	0	CD8T_c06-GZMK-IFNG	DUSP1
0	1.45605	0.741	0.293	0	CD8T_c06-GZMK-IFNG	UBE2S
0	1.43542	0.704	0.412	0	CD8T_c06-GZMK-IFNG	JUN
0	1.42774	0.575	0.132	0	CD8T_c06-GZMK-IFNG	NEU1
0	1.40978	0.792	0.379	0	CD8T_c06-GZMK-IFNG	TUBB4B
0	1.27718	0.725	0.253	0	CD8T_c06-GZMK-IFNG	PPP1R15A
0	1.26003	0.337	0.123	0	CD8T_c06-GZMK-IFNG	XCL1
0	1.25866	0.929	0.49	0	CD8T_c06-GZMK-IFNG	NR4A2
0	1.25855	0.48	0.118	0	CD8T_c06-GZMK-IFNG	NR4A1
0	1.23694	0.954	0.851	0	CD8T_c06-GZMK-IFNG	HSP90AA1
0	1.23625	0.411	0.135	0	CD8T_c06-GZMK-IFNG	IFNG
0	1.23435	0.685	0.305	0	CD8T_c06-GZMK-IFNG	HSPH1
0	1.21537	0.808	0.524	0	CD8T_c06-GZMK-IFNG	KLF6
0	1.1353	0.336	0.057	0	CD8T_c06-GZMK-IFNG	EGR1
0	1.11609	0.593	0.209	0	CD8T_c06-GZMK-IFNG	SERTAD1
0	1.09535	0.948	0.799	0	CD8T_c06-GZMK-IFNG	HSP90AB1
0	1.0913	0.597	0.274	0	CD8T_c06-GZMK-IFNG	CITED2
0	1.06167	0.988	0.94	0	CD8T_c06-GZMK-IFNG	HSPA8
0	1.05447	0.75	0.34	0	CD8T_c06-GZMK-IFNG	MYADM
0	1.03683	0.247	0.057	0	CD8T_c06-GZMK-IFNG	ATF3
0	1.0037	0.708	0.39	0	CD8T_c06-GZMK-IFNG	RGCC
0	0.983003	0.957	0.84	0	CD8T_c06-GZMK-IFNG	UBB
0	0.982841	0.395	0.084	0	CD8T_c06-GZMK-IFNG	RASGEF1B
0	0.979093	0.473	0.183	0	CD8T_c06-GZMK-IFNG	MARCKSL1
0	0.978298	0.482	0.158	0	CD8T_c06-GZMK-IFNG	H2AFX
0	0.966113	0.835	0.633	0	CD8T_c06-GZMK-IFNG	TSC22D3
0	0.956385	0.651	0.383	0	CD8T_c06-GZMK-IFNG	TUBA1A
0	0.924127	0.692	0.414	0	CD8T_c06-GZMK-IFNG	TAGAP
0	0.922534	0.799	0.558	0	CD8T_c06-GZMK-IFNG	CD69
0	0.894067	0.578	0.284	0	CD8T_c06-GZMK-IFNG	EIF4A3
0	0.878069	0.892	0.698	0	CD8T_c06-GZMK-IFNG	JUNB
0	0.86492	0.789	0.514	0	CD8T_c06-GZMK-IFNG	BRD2
0	0.862723	0.313	0.083	0	CD8T_c06-GZMK-IFNG	TNFSF9
0	0.860266	0.541	0.295	0	CD8T_c06-GZMK-IFNG	ODC1
0	0.85879	0.739	0.474	0	CD8T_c06-GZMK-IFNG	DYNLL1
0	0.830623	0.42	0.182	0	CD8T_c06-GZMK-IFNG	LMNA
0	0.828176	0.522	0.26	0	CD8T_c06-GZMK-IFNG	SOCS1
0	0.822884	0.715	0.547	0	CD8T_c06-GZMK-IFNG	ZFP36L1
0	0.810642	0.414	0.146	0	CD8T_c06-GZMK-IFNG	ANKRD37
0	0.789412	0.797	0.501	0	CD8T_c06-GZMK-IFNG	YPEL5
0	0.779483	0.516	0.209	0	CD8T_c06-GZMK-IFNG	CSRNP1
0	0.777796	0.691	0.425	0	CD8T_c06-GZMK-IFNG	BTG2
0	0.77228	0.627	0.374	0	CD8T_c06-GZMK-IFNG	DDX3X
0	0.759799	0.421	0.198	0	CD8T_c06-GZMK-IFNG	SNHG12
0	0.751187	0.993	0.962	0	CD8T_c06-GZMK-IFNG	H3F3B
0	0.747588	0.715	0.47	0	CD8T_c06-GZMK-IFNG	TUBA1B
0	0.743478	0.399	0.185	0	CD8T_c06-GZMK-IFNG	CHMP1B
0	0.739056	0.418	0.17	0	CD8T_c06-GZMK-IFNG	CKS2
0	0.737326	0.732	0.548	0	CD8T_c06-GZMK-IFNG	IER2
0	0.726276	0.575	0.333	0	CD8T_c06-GZMK-IFNG	GTF2B
0	0.721044	0.434	0.212	0	CD8T_c06-GZMK-IFNG	IFRD1
0	0.717636	0.782	0.609	0	CD8T_c06-GZMK-IFNG	HSPE1
0	0.713379	0.934	0.686	0	CD8T_c06-GZMK-IFNG	ZFP36
0	0.705494	0.667	0.465	0	CD8T_c06-GZMK-IFNG	RSRP1
0	0.6825	0.655	0.395	0	CD8T_c06-GZMK-IFNG	ZNF331
0	0.671565	0.299	0.092	0	CD8T_c06-GZMK-IFNG	FAM53C
0	0.671548	0.261	0.062	0	CD8T_c06-GZMK-IFNG	AC020916.1
0	0.660815	0.994	0.984	0	CD8T_c06-GZMK-IFNG	EIF1
0	0.634213	0.743	0.536	0	CD8T_c06-GZMK-IFNG	MCL1
0	0.631124	0.752	0.601	0	CD8T_c06-GZMK-IFNG	FUS
0	0.610797	0.982	0.857	0	CD8T_c06-GZMK-IFNG	SRGN
0	0.606242	0.975	0.923	0	CD8T_c06-GZMK-IFNG	UBC
0	0.592632	0.931	0.667	0	CD8T_c06-GZMK-IFNG	DUSP2
0	0.526322	0.917	0.864	0	CD8T_c06-GZMK-IFNG	DDX5
0	0.467514	0.116	0.017	0	CD8T_c06-GZMK-IFNG	ID1
0	0.388292	0.106	0.014	0	CD8T_c06-GZMK-IFNG	HSPA2
2.62e-296	0.463496	0.897	0.826	4.02e-292	CD8T_c06-GZMK-IFNG	PNRC1
2.09e-293	0.684007	0.498	0.277	3.21e-289	CD8T_c06-GZMK-IFNG	SLC38A2
3.03e-284	0.584634	0.267	0.098	4.65e-280	CD8T_c06-GZMK-IFNG	TUBB2A
1.95e-283	0.727221	0.684	0.532	3e-279	CD8T_c06-GZMK-IFNG	H2AFZ
1.15e-281	0.635357	0.49	0.279	1.77e-277	CD8T_c06-GZMK-IFNG	AMD1
3.55e-269	0.929343	0.577	0.374	5.45e-265	CD8T_c06-GZMK-IFNG	GADD45B
1.99e-268	0.641506	0.4	0.195	3.05e-264	CD8T_c06-GZMK-IFNG	TIPARP
4.44e-262	0.301148	0.992	0.989	6.82e-258	CD8T_c06-GZMK-IFNG	PTMA
2.36e-260	0.846753	0.314	0.134	3.62e-256	CD8T_c06-GZMK-IFNG	AREG
2.3e-259	0.589457	0.468	0.243	3.54e-255	CD8T_c06-GZMK-IFNG	NR4A3
1.62e-255	0.367679	0.131	0.031	2.48e-251	CD8T_c06-GZMK-IFNG	ERRFI1
4.98e-251	0.510878	0.742	0.557	7.64e-247	CD8T_c06-GZMK-IFNG	HSPA5
1.65e-250	0.591594	0.389	0.188	2.54e-246	CD8T_c06-GZMK-IFNG	CDKN1A
1.24e-239	0.573515	0.199	0.067	1.9e-235	CD8T_c06-GZMK-IFNG	GLA
1.25e-232	1.10701	0.341	0.161	1.91e-228	CD8T_c06-GZMK-IFNG	XCL2
2.92e-230	0.569372	0.293	0.128	4.48e-226	CD8T_c06-GZMK-IFNG	IER5
1.75e-228	0.571552	0.55	0.359	2.69e-224	CD8T_c06-GZMK-IFNG	HERPUD1
8.11e-227	0.568864	0.308	0.141	1.24e-222	CD8T_c06-GZMK-IFNG	TUBA1C
3.68e-225	0.690556	0.637	0.46	5.65e-221	CD8T_c06-GZMK-IFNG	HSPD1
5.39e-224	0.477653	0.81	0.744	8.28e-220	CD8T_c06-GZMK-IFNG	CALM2
5.22e-222	0.488419	0.736	0.586	8.02e-218	CD8T_c06-GZMK-IFNG	SRSF2
1.1e-221	0.514872	0.27	0.114	1.69e-217	CD8T_c06-GZMK-IFNG	SLC1A5
5.98e-220	0.554655	0.527	0.329	9.18e-216	CD8T_c06-GZMK-IFNG	JUND
2.34e-218	0.467779	0.196	0.068	3.59e-214	CD8T_c06-GZMK-IFNG	ARL5B
9.19e-218	0.549847	0.37	0.192	1.41e-213	CD8T_c06-GZMK-IFNG	MYLIP
3.62e-217	0.608117	0.509	0.328	5.56e-213	CD8T_c06-GZMK-IFNG	ZC3HAV1
1.27e-215	0.591451	0.385	0.207	1.95e-211	CD8T_c06-GZMK-IFNG	PNP
1.14e-214	0.640184	0.56	0.38	1.75e-210	CD8T_c06-GZMK-IFNG	SDCBP
9.72e-212	0.40243	0.116	0.028	1.49e-207	CD8T_c06-GZMK-IFNG	ARL4D
5.2e-206	0.851895	0.241	0.098	7.98e-202	CD8T_c06-GZMK-IFNG	TNF
3.33e-205	0.53948	0.645	0.494	5.12e-201	CD8T_c06-GZMK-IFNG	ELF1
8.37e-203	0.451356	0.124	0.033	1.29e-198	CD8T_c06-GZMK-IFNG	SGK1
6.71e-202	0.443209	0.817	0.688	1.03e-197	CD8T_c06-GZMK-IFNG	SRSF7
8.23e-200	0.52907	0.45	0.272	1.26e-195	CD8T_c06-GZMK-IFNG	CLK1
9.73e-200	0.997833	0.109	0.027	1.49e-195	CD8T_c06-GZMK-IFNG	HSPA6
2.59e-199	0.582385	0.642	0.48	3.97e-195	CD8T_c06-GZMK-IFNG	SAT1
8.52e-198	0.402222	0.115	0.03	1.31e-193	CD8T_c06-GZMK-IFNG	EGR2
1.01e-195	0.478404	0.659	0.516	1.55e-191	CD8T_c06-GZMK-IFNG	EIF5
5.2e-193	0.425887	0.728	0.569	7.99e-189	CD8T_c06-GZMK-IFNG	SFPQ
3.94e-191	0.489215	0.343	0.179	6.04e-187	CD8T_c06-GZMK-IFNG	ATF4
6.09e-188	0.407869	0.748	0.53	9.35e-184	CD8T_c06-GZMK-IFNG	GZMK
3.35e-185	0.365674	0.116	0.032	5.15e-181	CD8T_c06-GZMK-IFNG	MLF1
2.4e-184	0.48737	0.278	0.13	3.69e-180	CD8T_c06-GZMK-IFNG	PLK3
4.53e-183	0.641492	0.8	0.73	6.95e-179	CD8T_c06-GZMK-IFNG	CRIP1
2.54e-182	0.563302	0.394	0.223	3.9e-178	CD8T_c06-GZMK-IFNG	INSIG1
1.09e-180	0.544371	0.254	0.115	1.68e-176	CD8T_c06-GZMK-IFNG	ZFAND2A
2.65e-180	0.419172	0.209	0.084	4.07e-176	CD8T_c06-GZMK-IFNG	ABHD5
4.29e-178	0.316475	0.108	0.029	6.58e-174	CD8T_c06-GZMK-IFNG	BAIAP2
8.24e-178	0.527332	0.682	0.592	1.27e-173	CD8T_c06-GZMK-IFNG	SAP18
9.45e-178	0.420456	0.907	0.867	1.45e-173	CD8T_c06-GZMK-IFNG	ZFP36L2
1.74e-177	0.450133	0.713	0.573	2.67e-173	CD8T_c06-GZMK-IFNG	SELENOK
5.49e-175	0.507236	0.325	0.172	8.43e-171	CD8T_c06-GZMK-IFNG	RNF139
1.79e-172	0.303209	0.944	0.935	2.75e-168	CD8T_c06-GZMK-IFNG	CALM1
5.11e-170	0.502007	0.142	0.047	7.85e-166	CD8T_c06-GZMK-IFNG	BAG3
5.88e-165	0.553934	0.34	0.188	9.03e-161	CD8T_c06-GZMK-IFNG	CHORDC1
2.04e-163	1.00936	0.169	0.063	3.14e-159	CD8T_c06-GZMK-IFNG	CCL3
4.39e-163	0.485308	0.706	0.538	6.73e-159	CD8T_c06-GZMK-IFNG	TNFAIP3
4.93e-163	0.427018	0.204	0.084	7.57e-159	CD8T_c06-GZMK-IFNG	TSC22D2
1.15e-162	0.279229	0.101	0.027	1.76e-158	CD8T_c06-GZMK-IFNG	ZNF296
4.43e-162	0.315188	0.888	0.835	6.8e-158	CD8T_c06-GZMK-IFNG	YWHAZ
1.03e-161	0.508978	0.356	0.205	1.57e-157	CD8T_c06-GZMK-IFNG	AHSA1
1.51e-159	0.487718	0.431	0.257	2.33e-155	CD8T_c06-GZMK-IFNG	RGS2
3.64e-159	0.452636	0.598	0.446	5.59e-155	CD8T_c06-GZMK-IFNG	DNAJB6
2.76e-158	0.519915	0.455	0.297	4.24e-154	CD8T_c06-GZMK-IFNG	MAT2A
5.46e-157	0.537165	0.41	0.244	8.38e-153	CD8T_c06-GZMK-IFNG	TSPYL2
3.27e-156	0.470319	0.392	0.237	5.02e-152	CD8T_c06-GZMK-IFNG	ZFAND5
6.75e-156	0.395858	0.549	0.359	1.04e-151	CD8T_c06-GZMK-IFNG	TENT5C
3.49e-155	0.519259	0.246	0.115	5.36e-151	CD8T_c06-GZMK-IFNG	RBKS
4.05e-155	0.506509	0.213	0.092	6.21e-151	CD8T_c06-GZMK-IFNG	RHOB
8.34e-155	0.423808	0.676	0.568	1.28e-150	CD8T_c06-GZMK-IFNG	ATP6V0C
5.14e-153	0.404805	0.193	0.081	7.89e-149	CD8T_c06-GZMK-IFNG	HEXIM1
2.74e-151	0.492619	0.463	0.304	4.2e-147	CD8T_c06-GZMK-IFNG	AC016831.7
1.02e-147	0.390943	0.824	0.673	1.57e-143	CD8T_c06-GZMK-IFNG	CXCR4
6.91e-144	0.573382	0.456	0.317	1.06e-139	CD8T_c06-GZMK-IFNG	CACYBP
2.29e-139	0.575545	0.367	0.221	3.52e-135	CD8T_c06-GZMK-IFNG	FABP5
2.76e-139	0.539815	0.307	0.176	4.23e-135	CD8T_c06-GZMK-IFNG	MRPL18
6.32e-139	0.412653	0.15	0.056	9.71e-135	CD8T_c06-GZMK-IFNG	NFKBID
1.78e-138	0.475052	0.511	0.37	2.73e-134	CD8T_c06-GZMK-IFNG	CCNL1
1.35e-137	0.296204	0.772	0.528	2.08e-133	CD8T_c06-GZMK-IFNG	CREM
1.01e-136	0.494888	0.515	0.374	1.54e-132	CD8T_c06-GZMK-IFNG	IDS
1.07e-136	0.429719	0.508	0.364	1.64e-132	CD8T_c06-GZMK-IFNG	ARF4
2.82e-135	0.502998	0.676	0.554	4.33e-131	CD8T_c06-GZMK-IFNG	TUBA4A
2.54e-133	0.412948	0.512	0.351	3.89e-129	CD8T_c06-GZMK-IFNG	SAMSN1
2.47e-128	0.417319	0.561	0.438	3.79e-124	CD8T_c06-GZMK-IFNG	MAP1LC3B
8.72e-127	0.433871	0.584	0.468	1.34e-122	CD8T_c06-GZMK-IFNG	CYCS
1.14e-124	0.482523	0.393	0.256	1.75e-120	CD8T_c06-GZMK-IFNG	POLR2A
1.43e-123	0.345755	0.151	0.06	2.19e-119	CD8T_c06-GZMK-IFNG	DNAJB4
1.22e-122	0.353785	0.109	0.036	1.88e-118	CD8T_c06-GZMK-IFNG	IER3
3.42e-121	0.444256	0.583	0.483	5.25e-117	CD8T_c06-GZMK-IFNG	EIF4A2
3.97e-121	0.429783	0.403	0.267	6.1e-117	CD8T_c06-GZMK-IFNG	HNRNPAB
1.88e-118	0.526335	0.47	0.313	2.88e-114	CD8T_c06-GZMK-IFNG	RGS1
9.61e-118	0.37902	0.567	0.427	1.48e-113	CD8T_c06-GZMK-IFNG	NFKBIA
6.21e-114	0.438756	0.295	0.168	9.53e-110	CD8T_c06-GZMK-IFNG	CRTAM
1.29e-110	0.443494	0.437	0.3	1.98e-106	CD8T_c06-GZMK-IFNG	PTGER4
1.86e-110	0.46662	0.344	0.216	2.85e-106	CD8T_c06-GZMK-IFNG	PPP1R10
2.14e-110	0.433056	0.37	0.243	3.28e-106	CD8T_c06-GZMK-IFNG	NASP
2.8e-109	0.442159	0.389	0.258	4.3e-105	CD8T_c06-GZMK-IFNG	IVNS1ABP
3.19e-108	0.377197	0.223	0.117	4.9e-104	CD8T_c06-GZMK-IFNG	DEDD2
9.3e-108	0.425871	0.447	0.324	1.43e-103	CD8T_c06-GZMK-IFNG	EIF4A1
4.58e-106	0.481945	0.32	0.2	7.03e-102	CD8T_c06-GZMK-IFNG	TOB1
6.14e-105	0.429398	0.393	0.259	9.43e-101	CD8T_c06-GZMK-IFNG	CMC1
2.33e-103	0.413743	0.297	0.181	3.58e-99	CD8T_c06-GZMK-IFNG	OAT
1.15e-102	0.384168	0.26	0.147	1.77e-98	CD8T_c06-GZMK-IFNG	ARL4A
1.6e-98	0.425162	0.662	0.571	2.46e-94	CD8T_c06-GZMK-IFNG	IRF1
2.48e-94	0.368166	0.2	0.105	3.8e-90	CD8T_c06-GZMK-IFNG	ERO1B
2.09e-91	0.387044	0.39	0.271	3.21e-87	CD8T_c06-GZMK-IFNG	CDK17
3.5e-91	0.381536	0.315	0.203	5.37e-87	CD8T_c06-GZMK-IFNG	HBP1
4.76e-91	0.317699	0.626	0.537	7.31e-87	CD8T_c06-GZMK-IFNG	RBM8A
3.15e-88	0.38451	0.458	0.351	4.83e-84	CD8T_c06-GZMK-IFNG	WSB1
9.9e-87	0.397776	0.641	0.553	1.52e-82	CD8T_c06-GZMK-IFNG	HIST1H4C
2.18e-86	0.347829	0.643	0.566	3.35e-82	CD8T_c06-GZMK-IFNG	CD44
2.28e-86	0.495195	0.272	0.167	3.49e-82	CD8T_c06-GZMK-IFNG	ICOS
1.86e-84	0.49872	0.475	0.369	2.85e-80	CD8T_c06-GZMK-IFNG	NEAT1
2.17e-84	0.32005	0.166	0.082	3.34e-80	CD8T_c06-GZMK-IFNG	GADD45A
5.04e-83	0.324898	0.255	0.153	7.73e-79	CD8T_c06-GZMK-IFNG	OSER1
1.98e-81	0.361818	0.356	0.242	3.04e-77	CD8T_c06-GZMK-IFNG	RALGAPA1
4.35e-81	0.772084	0.638	0.622	6.68e-77	CD8T_c06-GZMK-IFNG	ANXA1
1.2e-77	0.299368	0.609	0.503	1.84e-73	CD8T_c06-GZMK-IFNG	ADGRE5
1.27e-77	0.413695	0.527	0.423	1.95e-73	CD8T_c06-GZMK-IFNG	ID2
1.28e-77	0.339492	0.178	0.096	1.97e-73	CD8T_c06-GZMK-IFNG	DNAAF2
3.59e-76	0.342339	0.569	0.487	5.5e-72	CD8T_c06-GZMK-IFNG	ARL6IP1
2.11e-75	0.311797	0.16	0.082	3.23e-71	CD8T_c06-GZMK-IFNG	HMGCS1
3.58e-74	0.331627	0.219	0.128	5.49e-70	CD8T_c06-GZMK-IFNG	NUFIP2
1.1e-73	0.316915	0.192	0.107	1.69e-69	CD8T_c06-GZMK-IFNG	KMT2E-AS1
3.74e-73	0.385637	0.365	0.269	5.74e-69	CD8T_c06-GZMK-IFNG	TCP1
2.62e-72	0.377777	0.393	0.291	4.02e-68	CD8T_c06-GZMK-IFNG	MAPRE2
9.82e-71	0.370592	0.447	0.357	1.51e-66	CD8T_c06-GZMK-IFNG	TRA2B
2.24e-70	0.437443	0.307	0.213	3.44e-66	CD8T_c06-GZMK-IFNG	GLUD1
4.06e-70	0.304097	0.596	0.521	6.23e-66	CD8T_c06-GZMK-IFNG	EIF4G2
7.49e-70	0.31885	0.196	0.112	1.15e-65	CD8T_c06-GZMK-IFNG	DDIT3
2.1e-67	0.327148	0.325	0.226	3.22e-63	CD8T_c06-GZMK-IFNG	DNAJB9
1.85e-66	0.337053	0.19	0.109	2.83e-62	CD8T_c06-GZMK-IFNG	PMAIP1
2.65e-65	0.358081	0.254	0.167	4.06e-61	CD8T_c06-GZMK-IFNG	SOD2
7.07e-65	0.351696	0.315	0.219	1.09e-60	CD8T_c06-GZMK-IFNG	GLS
1.88e-64	0.330068	0.582	0.485	2.88e-60	CD8T_c06-GZMK-IFNG	SLC2A3
3.01e-62	0.264106	0.138	0.071	4.62e-58	CD8T_c06-GZMK-IFNG	NAF1
9.75e-62	0.266877	0.147	0.078	1.5e-57	CD8T_c06-GZMK-IFNG	NXF1
8.09e-61	0.270398	0.16	0.088	1.24e-56	CD8T_c06-GZMK-IFNG	SLC25A4
1.35e-59	0.463051	0.102	0.047	2.08e-55	CD8T_c06-GZMK-IFNG	CCL3L1
4.51e-59	0.28287	0.186	0.111	6.93e-55	CD8T_c06-GZMK-IFNG	KCNA3
6.89e-59	0.282764	0.18	0.104	1.06e-54	CD8T_c06-GZMK-IFNG	ETV3
1.21e-58	0.288276	0.297	0.205	1.86e-54	CD8T_c06-GZMK-IFNG	ALG13
7.36e-58	0.334381	0.429	0.345	1.13e-53	CD8T_c06-GZMK-IFNG	JPT1
1.38e-57	0.289613	0.184	0.108	2.12e-53	CD8T_c06-GZMK-IFNG	TOB2
2.34e-57	0.299065	0.279	0.193	3.59e-53	CD8T_c06-GZMK-IFNG	COQ10B
1.19e-55	0.287191	0.252	0.171	1.83e-51	CD8T_c06-GZMK-IFNG	GRPEL1
3.57e-55	0.310739	0.401	0.318	5.47e-51	CD8T_c06-GZMK-IFNG	BCAS2
3.7e-54	0.25038	0.682	0.603	5.68e-50	CD8T_c06-GZMK-IFNG	EZR
3.94e-54	0.31564	0.329	0.245	6.04e-50	CD8T_c06-GZMK-IFNG	SBDS
1.21e-53	0.343429	0.407	0.329	1.85e-49	CD8T_c06-GZMK-IFNG	ATP1A1
1.51e-53	0.270941	0.407	0.311	2.32e-49	CD8T_c06-GZMK-IFNG	IDI1
3.62e-52	0.284489	0.281	0.2	5.55e-48	CD8T_c06-GZMK-IFNG	STMN1
1.69e-51	0.254262	0.577	0.507	2.59e-47	CD8T_c06-GZMK-IFNG	STK17B
5.98e-51	0.302814	0.215	0.14	9.19e-47	CD8T_c06-GZMK-IFNG	NUDT4
2.78e-50	0.285141	0.316	0.229	4.27e-46	CD8T_c06-GZMK-IFNG	JMJD6
3.54e-49	0.298009	0.612	0.582	5.43e-45	CD8T_c06-GZMK-IFNG	SRSF5
2.87e-46	0.564658	0.578	0.521	4.4e-42	CD8T_c06-GZMK-IFNG	KLF2
3.96e-46	0.305525	0.291	0.21	6.08e-42	CD8T_c06-GZMK-IFNG	DDX3Y
6.38e-46	0.295171	0.558	0.51	9.8e-42	CD8T_c06-GZMK-IFNG	ZFAS1
1.8e-45	0.287377	0.228	0.155	2.77e-41	CD8T_c06-GZMK-IFNG	MIDN
2.34e-45	0.312707	0.335	0.263	3.6e-41	CD8T_c06-GZMK-IFNG	RSRC2
5.36e-45	0.262864	0.558	0.507	8.23e-41	CD8T_c06-GZMK-IFNG	STK17A
5.11e-44	0.264191	0.123	0.068	7.84e-40	CD8T_c06-GZMK-IFNG	ID3
2.19e-43	0.347029	0.242	0.172	3.36e-39	CD8T_c06-GZMK-IFNG	RILPL2
2.92e-43	0.322103	0.259	0.185	4.48e-39	CD8T_c06-GZMK-IFNG	ARID5B
6.17e-43	0.251642	0.604	0.569	9.48e-39	CD8T_c06-GZMK-IFNG	RBM39
1.14e-42	0.269856	0.292	0.217	1.76e-38	CD8T_c06-GZMK-IFNG	CHIC2
4.33e-42	0.261561	0.32	0.242	6.65e-38	CD8T_c06-GZMK-IFNG	NAA50
4.27e-41	0.296652	0.191	0.127	6.55e-37	CD8T_c06-GZMK-IFNG	FKBP4
9.53e-41	0.324336	0.261	0.188	1.46e-36	CD8T_c06-GZMK-IFNG	OASL
6.81e-40	0.280325	0.21	0.143	1.04e-35	CD8T_c06-GZMK-IFNG	INTS6
2.21e-38	0.261049	0.193	0.131	3.39e-34	CD8T_c06-GZMK-IFNG	CDKN2AIP
2.89e-38	0.254958	0.213	0.147	4.43e-34	CD8T_c06-GZMK-IFNG	BTG3
1.26e-37	0.261384	0.244	0.176	1.94e-33	CD8T_c06-GZMK-IFNG	HCG18
1.09e-36	0.279801	0.239	0.175	1.67e-32	CD8T_c06-GZMK-IFNG	ISG20L2
5.89e-36	0.280667	0.456	0.395	9.04e-32	CD8T_c06-GZMK-IFNG	CCNH
6.89e-36	0.26518	0.298	0.235	1.06e-31	CD8T_c06-GZMK-IFNG	PITHD1
8.96e-36	0.260145	0.285	0.219	1.38e-31	CD8T_c06-GZMK-IFNG	TBCC
1.28e-35	0.33002	0.22	0.157	1.97e-31	CD8T_c06-GZMK-IFNG	YBX3
5.43e-35	0.265301	0.572	0.534	8.33e-31	CD8T_c06-GZMK-IFNG	SQSTM1
1.25e-34	0.25464	0.63	0.628	1.91e-30	CD8T_c06-GZMK-IFNG	SOD1
2.91e-33	0.268572	0.396	0.341	4.47e-29	CD8T_c06-GZMK-IFNG	BCLAF1
3.14e-33	0.291379	0.45	0.403	4.82e-29	CD8T_c06-GZMK-IFNG	SNHG8
4.8e-30	0.267275	0.381	0.332	7.37e-26	CD8T_c06-GZMK-IFNG	RBBP6
1.34e-29	0.252265	0.209	0.153	2.06e-25	CD8T_c06-GZMK-IFNG	KDM2A
1.56e-28	0.278398	0.286	0.232	2.4e-24	CD8T_c06-GZMK-IFNG	SNHG7
4.24e-28	0.252093	0.426	0.385	6.52e-24	CD8T_c06-GZMK-IFNG	CCT4
2.43e-25	0.254732	0.199	0.15	3.73e-21	CD8T_c06-GZMK-IFNG	TLE4
1.06e-24	0.27015	0.301	0.253	1.63e-20	CD8T_c06-GZMK-IFNG	SCML4
1.99e-22	0.251733	0.166	0.121	3.06e-18	CD8T_c06-GZMK-IFNG	GLUL
1e-12	0.309937	0.348	0.328	1.54e-08	CD8T_c06-GZMK-IFNG	HSPB1
3.98e-05	0.320574	0.295	0.288	0.610589	CD8T_c06-GZMK-IFNG	MT1X
0	1.03071	0.846	0.509	0	CD8T_c07-GZMK-PDCD1	TUBA4A
0	0.981383	0.98	0.627	0	CD8T_c07-GZMK-PDCD1	CXCR4
0	0.952471	0.682	0.256	0	CD8T_c07-GZMK-PDCD1	RGS1
0	0.91985	0.8	0.395	0	CD8T_c07-GZMK-PDCD1	FAM177A1
0	0.882435	0.736	0.429	0	CD8T_c07-GZMK-PDCD1	PIK3R1
0	0.877215	0.946	0.468	0	CD8T_c07-GZMK-PDCD1	CREM
0	0.859178	0.837	0.457	0	CD8T_c07-GZMK-PDCD1	YPEL5
0	0.847762	0.714	0.307	0	CD8T_c07-GZMK-PDCD1	TENT5C
0	0.836054	0.981	0.626	0	CD8T_c07-GZMK-PDCD1	DUSP2
0	0.832914	0.867	0.482	0	CD8T_c07-GZMK-PDCD1	GZMK
0	0.822397	0.614	0.298	0	CD8T_c07-GZMK-PDCD1	ATP1B3
0	0.817593	0.325	0.076	0	CD8T_c07-GZMK-PDCD1	ENC1
0	0.804508	0.899	0.442	0	CD8T_c07-GZMK-PDCD1	NR4A2
0	0.802011	0.734	0.349	0	CD8T_c07-GZMK-PDCD1	ZNF331
0	0.79438	0.941	0.655	0	CD8T_c07-GZMK-PDCD1	ZFP36
0	0.748897	0.607	0.299	0	CD8T_c07-GZMK-PDCD1	CEMIP2
0	0.733647	0.554	0.273	0	CD8T_c07-GZMK-PDCD1	IDI1
0	0.710821	0.517	0.207	0	CD8T_c07-GZMK-PDCD1	NR4A3
0	0.707438	0.828	0.535	0	CD8T_c07-GZMK-PDCD1	SELENOK
0	0.704141	0.777	0.447	0	CD8T_c07-GZMK-PDCD1	HLA-DRB1
0	0.686833	0.992	0.84	0	CD8T_c07-GZMK-PDCD1	SRGN
0	0.672188	0.534	0.255	0	CD8T_c07-GZMK-PDCD1	USP36
0	0.669708	0.681	0.368	0	CD8T_c07-GZMK-PDCD1	VPS37B
0	0.662366	0.461	0.193	0	CD8T_c07-GZMK-PDCD1	KPNA2
0	0.661708	0.575	0.3	0	CD8T_c07-GZMK-PDCD1	PDE4B
0	0.658389	0.588	0.312	0	CD8T_c07-GZMK-PDCD1	RBM38
0	0.653451	0.272	0.108	0	CD8T_c07-GZMK-PDCD1	XCL1
0	0.652549	0.955	0.854	0	CD8T_c07-GZMK-PDCD1	ZFP36L2
0	0.652096	0.872	0.663	0	CD8T_c07-GZMK-PDCD1	SRSF7
0	0.649618	0.629	0.365	0	CD8T_c07-GZMK-PDCD1	RGCC
0	0.648546	0.818	0.624	0	CD8T_c07-GZMK-PDCD1	LDHA
0	0.64688	0.471	0.212	0	CD8T_c07-GZMK-PDCD1	HLA-DQA1
0	0.642728	0.665	0.387	0	CD8T_c07-GZMK-PDCD1	SYTL3
0	0.640238	0.703	0.451	0	CD8T_c07-GZMK-PDCD1	SLC2A3
0	0.629842	0.809	0.57	0	CD8T_c07-GZMK-PDCD1	EZR
0	0.626432	0.364	0.123	0	CD8T_c07-GZMK-PDCD1	DUSP4
0	0.619435	0.77	0.53	0	CD8T_c07-GZMK-PDCD1	HSPA5
0	0.618032	0.82	0.589	0	CD8T_c07-GZMK-PDCD1	LEPROTL1
0	0.614952	0.962	0.861	0	CD8T_c07-GZMK-PDCD1	CD74
0	0.599108	0.564	0.283	0	CD8T_c07-GZMK-PDCD1	DUSP5
0	0.586447	0.471	0.234	0	CD8T_c07-GZMK-PDCD1	GABARAPL1
0	0.583491	0.523	0.311	0	CD8T_c07-GZMK-PDCD1	RNF125
0	0.582549	0.546	0.327	0	CD8T_c07-GZMK-PDCD1	MYADM
0	0.579114	0.546	0.292	0	CD8T_c07-GZMK-PDCD1	SYAP1
0	0.569788	0.721	0.509	0	CD8T_c07-GZMK-PDCD1	PDCD4
0	0.567588	0.526	0.3	0	CD8T_c07-GZMK-PDCD1	RNF19A
0	0.565329	0.776	0.541	0	CD8T_c07-GZMK-PDCD1	SFPQ
0	0.563176	0.292	0.136	0	CD8T_c07-GZMK-PDCD1	YBX3
0	0.563144	0.48	0.272	0	CD8T_c07-GZMK-PDCD1	NSMCE3
0	0.558772	0.574	0.32	0	CD8T_c07-GZMK-PDCD1	SAMSN1
0	0.553893	0.707	0.449	0	CD8T_c07-GZMK-PDCD1	SH2D2A
0	0.553341	0.656	0.435	0	CD8T_c07-GZMK-PDCD1	HSPD1
0	0.548035	0.573	0.345	0	CD8T_c07-GZMK-PDCD1	GSPT1
0	0.547571	0.795	0.575	0	CD8T_c07-GZMK-PDCD1	FYN
0	0.540879	0.633	0.372	0	CD8T_c07-GZMK-PDCD1	TNFRSF1B
0	0.540769	0.453	0.241	0	CD8T_c07-GZMK-PDCD1	HLA-DRA
0	0.536757	0.755	0.567	0	CD8T_c07-GZMK-PDCD1	DDX24
0	0.534776	0.423	0.214	0	CD8T_c07-GZMK-PDCD1	NAA50
0	0.530968	0.31	0.144	0	CD8T_c07-GZMK-PDCD1	XCL2
0	0.529678	0.663	0.473	0	CD8T_c07-GZMK-PDCD1	ELF1
0	0.528061	0.706	0.48	0	CD8T_c07-GZMK-PDCD1	COTL1
0	0.523068	0.991	0.939	0	CD8T_c07-GZMK-PDCD1	BTG1
0	0.521998	0.445	0.228	0	CD8T_c07-GZMK-PDCD1	SKIL
0	0.519131	0.595	0.401	0	CD8T_c07-GZMK-PDCD1	NR3C1
0	0.515765	0.305	0.15	0	CD8T_c07-GZMK-PDCD1	CRTAM
0	0.513059	0.367	0.197	0	CD8T_c07-GZMK-PDCD1	IFRD1
0	0.50842	0.339	0.165	0	CD8T_c07-GZMK-PDCD1	OASL
0	0.506481	0.854	0.729	0	CD8T_c07-GZMK-PDCD1	CALM2
0	0.50424	0.494	0.293	0	CD8T_c07-GZMK-PDCD1	CNOT6L
0	0.503837	0.976	0.902	0	CD8T_c07-GZMK-PDCD1	SARAF
0	0.503827	0.414	0.232	0	CD8T_c07-GZMK-PDCD1	PDCL3
0	0.50122	0.266	0.114	0	CD8T_c07-GZMK-PDCD1	AUTS2
0	0.498457	0.705	0.518	0	CD8T_c07-GZMK-PDCD1	MCL1
0	0.496549	0.405	0.22	0	CD8T_c07-GZMK-PDCD1	RALGAPA1
0	0.494551	0.458	0.294	0	CD8T_c07-GZMK-PDCD1	RANBP2
0	0.49346	0.519	0.28	0	CD8T_c07-GZMK-PDCD1	FOSL2
0	0.482528	0.353	0.172	0	CD8T_c07-GZMK-PDCD1	PPP1R16B
0	0.481416	0.554	0.36	0	CD8T_c07-GZMK-PDCD1	SDCBP
0	0.480968	0.44	0.273	0	CD8T_c07-GZMK-PDCD1	SRRT
0	0.479284	0.753	0.565	0	CD8T_c07-GZMK-PDCD1	SRSF2
0	0.476734	0.961	0.776	0	CD8T_c07-GZMK-PDCD1	CST7
0	0.475175	0.354	0.175	0	CD8T_c07-GZMK-PDCD1	AOAH
0	0.47448	0.24	0.085	0	CD8T_c07-GZMK-PDCD1	DHCR7
0	0.470934	0.51	0.321	0	CD8T_c07-GZMK-PDCD1	JPT1
0	0.470047	0.52	0.324	0	CD8T_c07-GZMK-PDCD1	PTPN22
0	0.468951	0.345	0.167	0	CD8T_c07-GZMK-PDCD1	IL21R
0	0.468088	0.684	0.534	0	CD8T_c07-GZMK-PDCD1	HIST1H4C
0	0.46272	0.956	0.894	0	CD8T_c07-GZMK-PDCD1	PTPRC
0	0.461477	0.407	0.238	0	CD8T_c07-GZMK-PDCD1	ISCA1
0	0.460552	0.361	0.181	0	CD8T_c07-GZMK-PDCD1	NAMPT
0	0.45695	0.739	0.608	0	CD8T_c07-GZMK-PDCD1	TGFB1
0	0.453356	0.485	0.305	0	CD8T_c07-GZMK-PDCD1	SLA
0	0.453144	0.65	0.467	0	CD8T_c07-GZMK-PDCD1	UBE2B
0	0.452171	0.435	0.251	0	CD8T_c07-GZMK-PDCD1	PTP4A1
0	0.449243	0.655	0.484	0	CD8T_c07-GZMK-PDCD1	STK17B
0	0.448877	0.38	0.207	0	CD8T_c07-GZMK-PDCD1	JMJD6
0	0.447458	0.867	0.772	0	CD8T_c07-GZMK-PDCD1	CD8A
0	0.447107	0.417	0.251	0	CD8T_c07-GZMK-PDCD1	CDK17
0	0.444821	0.448	0.279	0	CD8T_c07-GZMK-PDCD1	MAT2A
0	0.444129	0.975	0.917	0	CD8T_c07-GZMK-PDCD1	UBC
0	0.44397	0.329	0.175	0	CD8T_c07-GZMK-PDCD1	PLEKHA2
0	0.442158	0.568	0.409	0	CD8T_c07-GZMK-PDCD1	SLC38A1
0	0.440757	0.754	0.593	0	CD8T_c07-GZMK-PDCD1	HSPE1
0	0.437197	0.28	0.134	0	CD8T_c07-GZMK-PDCD1	SC5D
0	0.436118	0.335	0.181	0	CD8T_c07-GZMK-PDCD1	TIPARP
0	0.434101	0.536	0.41	0	CD8T_c07-GZMK-PDCD1	RHOH
0	0.433154	0.229	0.104	0	CD8T_c07-GZMK-PDCD1	LMNB1
0	0.431926	0.269	0.128	0	CD8T_c07-GZMK-PDCD1	FBXO34
0	0.431674	0.704	0.498	0	CD8T_c07-GZMK-PDCD1	HLA-DPA1
0	0.429825	0.163	0.05	0	CD8T_c07-GZMK-PDCD1	BIK
0	0.426986	0.346	0.197	0	CD8T_c07-GZMK-PDCD1	SLA2
0	0.426004	0.439	0.291	0	CD8T_c07-GZMK-PDCD1	CHD1
0	0.423846	0.619	0.495	0	CD8T_c07-GZMK-PDCD1	ALOX5AP
0	0.42012	0.346	0.2	0	CD8T_c07-GZMK-PDCD1	CRYBG1
0	0.419833	0.624	0.423	0	CD8T_c07-GZMK-PDCD1	DNAJB6
0	0.417729	0.626	0.458	0	CD8T_c07-GZMK-PDCD1	EMD
0	0.416527	0.522	0.376	0	CD8T_c07-GZMK-PDCD1	CCNH
0	0.416282	0.429	0.289	0	CD8T_c07-GZMK-PDCD1	SH2D1A
0	0.415809	0.689	0.498	0	CD8T_c07-GZMK-PDCD1	BRD2
0	0.413367	0.693	0.574	0	CD8T_c07-GZMK-PDCD1	NDUFS5
0	0.413029	0.188	0.071	0	CD8T_c07-GZMK-PDCD1	IRF4
0	0.412765	0.34	0.199	0	CD8T_c07-GZMK-PDCD1	NUP98
0	0.412157	0.257	0.121	0	CD8T_c07-GZMK-PDCD1	GGA2
0	0.408578	0.328	0.188	0	CD8T_c07-GZMK-PDCD1	ALG13
0	0.404648	0.349	0.207	0	CD8T_c07-GZMK-PDCD1	FABP5
0	0.402642	0.394	0.256	0	CD8T_c07-GZMK-PDCD1	SLBP
0	0.401853	0.601	0.447	0	CD8T_c07-GZMK-PDCD1	EML4
0	0.401733	0.436	0.271	0	CD8T_c07-GZMK-PDCD1	ZEB2
0	0.399785	0.401	0.244	0	CD8T_c07-GZMK-PDCD1	CSNK1D
0	0.399599	0.615	0.432	0	CD8T_c07-GZMK-PDCD1	ITM2A
0	0.39878	0.573	0.435	0	CD8T_c07-GZMK-PDCD1	TERF2IP
0	0.396058	0.515	0.345	0	CD8T_c07-GZMK-PDCD1	ARF4
0	0.395939	0.457	0.314	0	CD8T_c07-GZMK-PDCD1	RUNX3
0	0.392631	0.229	0.089	0	CD8T_c07-GZMK-PDCD1	METRNL
0	0.389039	0.774	0.647	0	CD8T_c07-GZMK-PDCD1	CALR
0	0.383383	0.506	0.28	0	CD8T_c07-GZMK-PDCD1	UBE2S
0	0.382735	0.484	0.319	0	CD8T_c07-GZMK-PDCD1	GTF2B
0	0.381572	0.353	0.204	0	CD8T_c07-GZMK-PDCD1	HLA-DRB5
0	0.380775	0.753	0.652	0	CD8T_c07-GZMK-PDCD1	GZMM
0	0.378544	0.417	0.266	0	CD8T_c07-GZMK-PDCD1	AMD1
0	0.377823	0.605	0.47	0	CD8T_c07-GZMK-PDCD1	ARL6IP1
0	0.37334	0.389	0.238	0	CD8T_c07-GZMK-PDCD1	ZBTB1
0	0.373289	0.751	0.68	0	CD8T_c07-GZMK-PDCD1	LITAF
0	0.373248	0.694	0.554	0	CD8T_c07-GZMK-PDCD1	IRF1
0	0.372124	0.773	0.506	0	CD8T_c07-GZMK-PDCD1	TNFAIP3
0	0.371039	0.325	0.178	0	CD8T_c07-GZMK-PDCD1	PDCD1
0	0.370366	0.716	0.529	0	CD8T_c07-GZMK-PDCD1	HLA-DPB1
0	0.368507	0.249	0.127	0	CD8T_c07-GZMK-PDCD1	DCTN6
0	0.368293	0.439	0.268	0	CD8T_c07-GZMK-PDCD1	BCL3
0	0.367811	0.966	0.941	0	CD8T_c07-GZMK-PDCD1	ARHGDIB
0	0.367664	0.988	0.959	0	CD8T_c07-GZMK-PDCD1	H3F3B
0	0.365846	0.787	0.679	0	CD8T_c07-GZMK-PDCD1	NCL
0	0.365468	0.378	0.224	0	CD8T_c07-GZMK-PDCD1	LYST
0	0.363611	0.682	0.554	0	CD8T_c07-GZMK-PDCD1	ATP6V0C
0	0.363607	0.341	0.202	0	CD8T_c07-GZMK-PDCD1	ETF1
0	0.35078	0.484	0.332	0	CD8T_c07-GZMK-PDCD1	NFE2L2
0	0.345997	0.444	0.272	0	CD8T_c07-GZMK-PDCD1	EIF4A3
0	0.336633	0.9	0.826	0	CD8T_c07-GZMK-PDCD1	YWHAZ
0	0.333914	0.362	0.206	0	CD8T_c07-GZMK-PDCD1	TIGIT
0	0.33316	0.959	0.931	0	CD8T_c07-GZMK-PDCD1	CALM1
0	0.331687	0.116	0.028	0	CD8T_c07-GZMK-PDCD1	TNIP3
0	0.328663	0.813	0.689	0	CD8T_c07-GZMK-PDCD1	JUNB
0	0.325777	0.404	0.249	0	CD8T_c07-GZMK-PDCD1	SOCS1
0	0.325082	0.193	0.081	0	CD8T_c07-GZMK-PDCD1	MAP1LC3A
0	0.323774	0.665	0.494	0	CD8T_c07-GZMK-PDCD1	DDIT4
0	0.322313	0.647	0.523	0	CD8T_c07-GZMK-PDCD1	RBM8A
0	0.311034	0.471	0.297	0	CD8T_c07-GZMK-PDCD1	HSPH1
0	0.299719	0.799	0.734	0	CD8T_c07-GZMK-PDCD1	SUB1
0	0.297592	0.636	0.433	0	CD8T_c07-GZMK-PDCD1	REL
0	0.29607	0.579	0.413	0	CD8T_c07-GZMK-PDCD1	BTG2
0	0.290984	0.999	0.996	0	CD8T_c07-GZMK-PDCD1	HLA-A
0	0.280613	0.8	0.747	0	CD8T_c07-GZMK-PDCD1	SKP1
0	0.279085	0.988	0.983	0	CD8T_c07-GZMK-PDCD1	EIF1
0	0.278603	0.892	0.71	0	CD8T_c07-GZMK-PDCD1	GZMA
0	0.265701	0.884	0.863	0	CD8T_c07-GZMK-PDCD1	OAZ1
0	0.262658	0.971	0.937	0	CD8T_c07-GZMK-PDCD1	HSPA8
0	0.257973	0.991	0.989	0	CD8T_c07-GZMK-PDCD1	PTMA
0	0.255124	0.956	0.94	0	CD8T_c07-GZMK-PDCD1	GAPDH
6.07e-305	0.35623	0.247	0.124	9.32e-301	CD8T_c07-GZMK-PDCD1	AREG
4.94e-304	0.400092	0.499	0.365	7.58e-300	CD8T_c07-GZMK-PDCD1	AKNA
1.15e-301	0.28973	0.747	0.666	1.76e-297	CD8T_c07-GZMK-PDCD1	SLC25A3
5.07e-301	0.290741	0.817	0.775	7.78e-297	CD8T_c07-GZMK-PDCD1	YWHAB
1.12e-296	0.373386	0.463	0.323	1.73e-292	CD8T_c07-GZMK-PDCD1	SURF4
1.3e-296	0.337799	0.245	0.126	1.99e-292	CD8T_c07-GZMK-PDCD1	ELL2
1.86e-294	0.327197	0.466	0.315	2.86e-290	CD8T_c07-GZMK-PDCD1	JUND
8.94e-294	0.277045	0.13	0.048	1.37e-289	CD8T_c07-GZMK-PDCD1	ZNF184
1.16e-291	0.386049	0.405	0.269	1.78e-287	CD8T_c07-GZMK-PDCD1	SMARCA5
2.48e-288	0.340713	0.684	0.598	3.8e-284	CD8T_c07-GZMK-PDCD1	PGK1
3.82e-288	0.382167	0.361	0.228	5.86e-284	CD8T_c07-GZMK-PDCD1	USP11
8.74e-287	0.353188	0.289	0.159	1.34e-282	CD8T_c07-GZMK-PDCD1	HLA-DQB1
5.36e-285	0.368794	0.487	0.347	8.23e-281	CD8T_c07-GZMK-PDCD1	HERPUD1
1.38e-283	0.365396	0.429	0.285	2.12e-279	CD8T_c07-GZMK-PDCD1	PTGER4
8.71e-283	0.330308	0.186	0.086	1.34e-278	CD8T_c07-GZMK-PDCD1	TMEM39A
5.78e-282	0.346475	0.291	0.168	8.88e-278	CD8T_c07-GZMK-PDCD1	OAT
9.26e-277	0.364487	0.449	0.315	1.42e-272	CD8T_c07-GZMK-PDCD1	ARHGAP9
1.41e-275	0.355944	0.562	0.44	2.16e-271	CD8T_c07-GZMK-PDCD1	AKAP13
1.52e-271	0.312069	0.621	0.505	2.34e-267	CD8T_c07-GZMK-PDCD1	EIF5
3.23e-269	0.325153	0.586	0.469	4.97e-265	CD8T_c07-GZMK-PDCD1	ARF6
4.98e-269	0.314224	0.311	0.178	7.64e-265	CD8T_c07-GZMK-PDCD1	CDKN1A
1.32e-263	0.345444	0.436	0.307	2.03e-259	CD8T_c07-GZMK-PDCD1	MAPK1IP1L
5.41e-263	0.334089	0.389	0.259	8.31e-259	CD8T_c07-GZMK-PDCD1	UBE2A
3.74e-260	0.299544	0.684	0.595	5.75e-256	CD8T_c07-GZMK-PDCD1	FUS
3.17e-259	0.330122	0.433	0.302	4.87e-255	CD8T_c07-GZMK-PDCD1	BCAS2
6.54e-259	0.306529	0.28	0.158	1e-254	CD8T_c07-GZMK-PDCD1	HLA-DMA
1.02e-255	0.36477	0.395	0.265	1.57e-251	CD8T_c07-GZMK-PDCD1	IL2RB
3.35e-254	0.364289	0.488	0.362	5.14e-250	CD8T_c07-GZMK-PDCD1	IDS
1.07e-252	0.365767	0.301	0.174	1.64e-248	CD8T_c07-GZMK-PDCD1	LMNA
2.89e-251	0.321204	0.28	0.163	4.44e-247	CD8T_c07-GZMK-PDCD1	JOSD1
9.52e-250	0.295287	0.642	0.534	1.46e-245	CD8T_c07-GZMK-PDCD1	WIPF1
3.98e-249	0.343941	0.443	0.318	6.11e-245	CD8T_c07-GZMK-PDCD1	SERINC1
4.29e-249	0.395246	0.361	0.232	6.59e-245	CD8T_c07-GZMK-PDCD1	TSPYL2
1.1e-244	0.321875	0.338	0.213	1.69e-240	CD8T_c07-GZMK-PDCD1	INSIG1
5e-244	0.333385	0.29	0.175	7.67e-240	CD8T_c07-GZMK-PDCD1	PAF1
2.66e-243	0.344976	0.269	0.156	4.09e-239	CD8T_c07-GZMK-PDCD1	GPCPD1
9.31e-240	0.326895	0.464	0.343	1.43e-235	CD8T_c07-GZMK-PDCD1	HSPA9
3.54e-238	0.301184	0.186	0.093	5.44e-234	CD8T_c07-GZMK-PDCD1	MCM6
2.02e-237	0.278285	0.153	0.069	3.1e-233	CD8T_c07-GZMK-PDCD1	TENT4B
1.08e-231	0.330725	0.37	0.249	1.66e-227	CD8T_c07-GZMK-PDCD1	ARID5A
1.59e-228	0.288406	0.196	0.101	2.44e-224	CD8T_c07-GZMK-PDCD1	CDC34
7.91e-227	0.332814	0.378	0.26	1.21e-222	CD8T_c07-GZMK-PDCD1	MOB4
1.37e-226	0.324229	0.292	0.178	2.1e-222	CD8T_c07-GZMK-PDCD1	CHMP1B
1.97e-226	0.334706	0.606	0.51	3.02e-222	CD8T_c07-GZMK-PDCD1	EIF4G2
5.16e-226	0.313073	0.291	0.178	7.92e-222	CD8T_c07-GZMK-PDCD1	MTHFD2
2.43e-225	0.293075	0.598	0.489	3.74e-221	CD8T_c07-GZMK-PDCD1	BZW1
2.83e-224	0.262409	0.155	0.072	4.34e-220	CD8T_c07-GZMK-PDCD1	CYSTM1
1.22e-223	0.322355	0.248	0.144	1.88e-219	CD8T_c07-GZMK-PDCD1	P2RY10
3.45e-222	0.252695	0.122	0.05	5.29e-218	CD8T_c07-GZMK-PDCD1	CD200R1
1.29e-221	0.33183	0.363	0.245	1.98e-217	CD8T_c07-GZMK-PDCD1	PPP1CB
8.52e-221	0.331208	0.362	0.248	1.31e-216	CD8T_c07-GZMK-PDCD1	AKIRIN1
1.29e-218	0.283408	0.569	0.457	1.98e-214	CD8T_c07-GZMK-PDCD1	CYCS
5.5e-217	0.304047	0.603	0.491	8.45e-213	CD8T_c07-GZMK-PDCD1	ADGRE5
4.01e-214	0.26484	0.182	0.092	6.16e-210	CD8T_c07-GZMK-PDCD1	TUBB2A
7.31e-214	0.34101	0.47	0.353	1.12e-209	CD8T_c07-GZMK-PDCD1	STAT4
2.35e-213	0.310491	0.44	0.317	3.6e-209	CD8T_c07-GZMK-PDCD1	TPM4
2.65e-213	0.312729	0.274	0.167	4.07e-209	CD8T_c07-GZMK-PDCD1	PNPLA8
6.48e-213	0.376287	0.424	0.318	9.94e-209	CD8T_c07-GZMK-PDCD1	CD5
6.87e-213	0.279669	0.157	0.076	1.05e-208	CD8T_c07-GZMK-PDCD1	TLE3
1.27e-208	0.370808	0.386	0.274	1.94e-204	CD8T_c07-GZMK-PDCD1	CCND2
1.16e-204	0.274755	0.676	0.597	1.78e-200	CD8T_c07-GZMK-PDCD1	PDIA3
5.69e-204	0.288022	0.178	0.092	8.73e-200	CD8T_c07-GZMK-PDCD1	JMY
1.49e-203	0.315557	0.528	0.43	2.29e-199	CD8T_c07-GZMK-PDCD1	CDC42SE2
3.18e-203	0.318383	0.493	0.383	4.88e-199	CD8T_c07-GZMK-PDCD1	RNF149
3.38e-203	0.345646	0.562	0.469	5.19e-199	CD8T_c07-GZMK-PDCD1	CLEC2B
3.45e-203	0.308039	0.467	0.352	5.29e-199	CD8T_c07-GZMK-PDCD1	APMAP
6.45e-202	0.296132	0.483	0.379	9.9e-198	CD8T_c07-GZMK-PDCD1	MAGOH
4.04e-199	0.257452	0.549	0.428	6.2e-195	CD8T_c07-GZMK-PDCD1	G3BP2
4.48e-198	0.30862	0.636	0.558	6.88e-194	CD8T_c07-GZMK-PDCD1	CD44
1.39e-197	0.287034	0.165	0.084	2.13e-193	CD8T_c07-GZMK-PDCD1	PGRMC2
2.31e-194	0.275805	0.197	0.108	3.55e-190	CD8T_c07-GZMK-PDCD1	SLC1A5
1.98e-193	0.283159	0.531	0.428	3.04e-189	CD8T_c07-GZMK-PDCD1	MAP1LC3B
9.61e-192	0.378256	0.328	0.226	1.48e-187	CD8T_c07-GZMK-PDCD1	TRAT1
2.25e-191	0.292255	0.468	0.365	3.45e-187	CD8T_c07-GZMK-PDCD1	STRAP
5.78e-191	0.333051	0.441	0.338	8.88e-187	CD8T_c07-GZMK-PDCD1	NOP58
6.09e-191	0.333445	0.406	0.295	9.34e-187	CD8T_c07-GZMK-PDCD1	AC016831.7
2.14e-189	0.311226	0.43	0.325	3.28e-185	CD8T_c07-GZMK-PDCD1	EIF1AX
2.67e-189	0.320831	0.36	0.256	4.1e-185	CD8T_c07-GZMK-PDCD1	LAPTM4A
8.54e-189	0.327565	0.468	0.367	1.31e-184	CD8T_c07-GZMK-PDCD1	DDX6
4.23e-188	0.276732	0.285	0.181	6.49e-184	CD8T_c07-GZMK-PDCD1	MARCKSL1
6.28e-188	0.27593	0.185	0.1	9.64e-184	CD8T_c07-GZMK-PDCD1	GPR137B
6.45e-188	0.318816	0.627	0.552	9.9e-184	CD8T_c07-GZMK-PDCD1	ISG20
1.22e-186	0.259612	0.146	0.07	1.87e-182	CD8T_c07-GZMK-PDCD1	DTHD1
8.97e-185	0.337805	0.335	0.23	1.38e-180	CD8T_c07-GZMK-PDCD1	B4GALT1
1.66e-184	0.276607	0.583	0.499	2.55e-180	CD8T_c07-GZMK-PDCD1	TMEM50A
2.83e-183	0.313295	0.355	0.253	4.34e-179	CD8T_c07-GZMK-PDCD1	DNTTIP2
4.23e-181	0.318206	0.298	0.198	6.49e-177	CD8T_c07-GZMK-PDCD1	TMF1
1.53e-179	0.308271	0.407	0.306	2.35e-175	CD8T_c07-GZMK-PDCD1	SF3A1
1.61e-176	0.251644	0.255	0.154	2.47e-172	CD8T_c07-GZMK-PDCD1	TOX
2.9e-176	0.309711	0.382	0.27	4.45e-172	CD8T_c07-GZMK-PDCD1	IFNGR1
6.34e-175	0.287842	0.362	0.258	9.74e-171	CD8T_c07-GZMK-PDCD1	HNRNPAB
7.68e-175	0.284358	0.501	0.402	1.18e-170	CD8T_c07-GZMK-PDCD1	HNRNPUL1
1.85e-174	0.299458	0.388	0.284	2.84e-170	CD8T_c07-GZMK-PDCD1	TOP1
1.72e-173	0.291725	0.246	0.153	2.65e-169	CD8T_c07-GZMK-PDCD1	RNF168
3.97e-172	0.311487	0.35	0.247	6.1e-168	CD8T_c07-GZMK-PDCD1	POLR2A
7.72e-171	0.267104	0.478	0.369	1.18e-166	CD8T_c07-GZMK-PDCD1	DDX3X
8.25e-171	0.273338	0.229	0.138	1.27e-166	CD8T_c07-GZMK-PDCD1	CASP3
9.29e-170	0.294792	0.329	0.223	1.43e-165	CD8T_c07-GZMK-PDCD1	MAP3K8
1.58e-168	0.302977	0.204	0.119	2.42e-164	CD8T_c07-GZMK-PDCD1	GPR18
2.54e-167	0.305167	0.406	0.31	3.9e-163	CD8T_c07-GZMK-PDCD1	ORAI1
3.72e-166	0.277893	0.559	0.478	5.71e-162	CD8T_c07-GZMK-PDCD1	SRSF3
1.2e-165	0.265418	0.17	0.093	1.84e-161	CD8T_c07-GZMK-PDCD1	HAUS3
6.96e-163	0.280975	0.225	0.136	1.07e-158	CD8T_c07-GZMK-PDCD1	F2R
2.31e-162	0.299856	0.285	0.191	3.55e-158	CD8T_c07-GZMK-PDCD1	CTR9
6.99e-162	0.285533	0.391	0.297	1.07e-157	CD8T_c07-GZMK-PDCD1	SS18L2
2.81e-161	0.296942	0.256	0.165	4.31e-157	CD8T_c07-GZMK-PDCD1	HCG18
4.07e-161	0.302078	0.335	0.239	6.25e-157	CD8T_c07-GZMK-PDCD1	ADSS
4.02e-159	0.277229	0.239	0.152	6.18e-155	CD8T_c07-GZMK-PDCD1	NDEL1
6.46e-158	0.258394	0.173	0.096	9.92e-154	CD8T_c07-GZMK-PDCD1	ETV3
5.04e-156	0.296295	0.292	0.199	7.73e-152	CD8T_c07-GZMK-PDCD1	PDE7A
1.44e-153	0.262404	0.574	0.504	2.2e-149	CD8T_c07-GZMK-PDCD1	SNU13
2.24e-153	0.290009	0.383	0.288	3.43e-149	CD8T_c07-GZMK-PDCD1	DHX36
5.02e-152	0.276498	0.345	0.251	7.7e-148	CD8T_c07-GZMK-PDCD1	CEBPZ
1.49e-150	0.271874	0.387	0.292	2.29e-146	CD8T_c07-GZMK-PDCD1	SLC3A2
5.83e-150	0.311584	0.252	0.164	8.96e-146	CD8T_c07-GZMK-PDCD1	CXCR3
6.98e-150	0.292932	0.275	0.184	1.07e-145	CD8T_c07-GZMK-PDCD1	ATP8A1
1.34e-148	0.287445	0.374	0.277	2.05e-144	CD8T_c07-GZMK-PDCD1	NFATC2
5.81e-148	0.282248	0.25	0.165	8.91e-144	CD8T_c07-GZMK-PDCD1	ISG20L2
8.18e-146	0.255097	0.227	0.141	1.26e-141	CD8T_c07-GZMK-PDCD1	FASLG
1.34e-142	0.254482	0.6	0.531	2.06e-138	CD8T_c07-GZMK-PDCD1	HNRNPU
6.1e-140	0.278746	0.271	0.186	9.36e-136	CD8T_c07-GZMK-PDCD1	DDX27
7.55e-140	0.262083	0.191	0.115	1.16e-135	CD8T_c07-GZMK-PDCD1	MSL2
1.57e-138	0.274904	0.233	0.152	2.41e-134	CD8T_c07-GZMK-PDCD1	PRKX
3.99e-138	0.30948	0.287	0.201	6.13e-134	CD8T_c07-GZMK-PDCD1	DDX3Y
1.23e-137	0.251966	0.157	0.088	1.89e-133	CD8T_c07-GZMK-PDCD1	SIK3
4.08e-137	0.252826	0.206	0.128	6.26e-133	CD8T_c07-GZMK-PDCD1	ASXL2
4.91e-137	0.258542	0.32	0.232	7.53e-133	CD8T_c07-GZMK-PDCD1	EMC7
7.5e-137	0.279379	0.256	0.171	1.15e-132	CD8T_c07-GZMK-PDCD1	HNRNPLL
1.5e-133	0.263206	0.234	0.154	2.3e-129	CD8T_c07-GZMK-PDCD1	PRKAR2A
1.97e-133	0.259494	0.286	0.201	3.03e-129	CD8T_c07-GZMK-PDCD1	STAU1
4.89e-133	0.287349	0.284	0.199	7.51e-129	CD8T_c07-GZMK-PDCD1	PLIN2
2.21e-132	0.259118	0.298	0.209	3.39e-128	CD8T_c07-GZMK-PDCD1	PPP1R10
6.32e-132	0.292226	0.385	0.301	9.7e-128	CD8T_c07-GZMK-PDCD1	PITPNC1
2.27e-129	0.267924	0.244	0.164	3.49e-125	CD8T_c07-GZMK-PDCD1	EVI2A
4.65e-129	0.276314	0.362	0.275	7.14e-125	CD8T_c07-GZMK-PDCD1	HMGB2
3.36e-127	0.256721	0.248	0.167	5.15e-123	CD8T_c07-GZMK-PDCD1	RNF139
1.23e-126	0.25998	0.506	0.438	1.9e-122	CD8T_c07-GZMK-PDCD1	C9orf78
1.15e-124	0.270297	0.256	0.176	1.76e-120	CD8T_c07-GZMK-PDCD1	RFTN1
1.34e-124	0.267581	0.342	0.258	2.06e-120	CD8T_c07-GZMK-PDCD1	COPB1
2.01e-122	0.254485	0.29	0.208	3.08e-118	CD8T_c07-GZMK-PDCD1	RNMT
5.47e-122	0.250277	0.426	0.34	8.4e-118	CD8T_c07-GZMK-PDCD1	DDX21
4.81e-121	0.27565	0.333	0.248	7.39e-117	CD8T_c07-GZMK-PDCD1	ARAP2
8.33e-121	0.253804	0.169	0.102	1.28e-116	CD8T_c07-GZMK-PDCD1	ELMSAN1
1.01e-120	0.270038	0.394	0.315	1.55e-116	CD8T_c07-GZMK-PDCD1	RAB5IF
1.51e-120	0.25461	0.3	0.221	2.32e-116	CD8T_c07-GZMK-PDCD1	RPP21
7.71e-119	0.255619	0.31	0.23	1.18e-114	CD8T_c07-GZMK-PDCD1	WBP11
9.76e-117	0.308378	0.544	0.477	1.5e-112	CD8T_c07-GZMK-PDCD1	SAT1
1.33e-116	0.252908	0.337	0.251	2.05e-112	CD8T_c07-GZMK-PDCD1	IVNS1ABP
1.12e-113	0.289822	0.372	0.297	1.71e-109	CD8T_c07-GZMK-PDCD1	DCXR
3.55e-113	0.256967	0.23	0.157	5.44e-109	CD8T_c07-GZMK-PDCD1	B3GNT2
1.26e-112	0.260634	0.325	0.248	1.93e-108	CD8T_c07-GZMK-PDCD1	NRBP1
2.91e-111	0.257911	0.298	0.22	4.47e-107	CD8T_c07-GZMK-PDCD1	STARD7
6.45e-111	0.253027	0.316	0.237	9.91e-107	CD8T_c07-GZMK-PDCD1	NASP
1.62e-110	0.258531	0.364	0.284	2.49e-106	CD8T_c07-GZMK-PDCD1	IQGAP2
2.75e-104	0.307867	0.649	0.618	4.22e-100	CD8T_c07-GZMK-PDCD1	ANXA1
4e-97	0.253777	0.351	0.276	6.14e-93	CD8T_c07-GZMK-PDCD1	SLC38A2
1.24e-95	0.261661	0.196	0.135	1.91e-91	CD8T_c07-GZMK-PDCD1	EIF1AY
5.6e-94	0.263431	0.27	0.202	8.6e-90	CD8T_c07-GZMK-PDCD1	CD28
2.56e-84	0.272331	0.751	0.731	3.93e-80	CD8T_c07-GZMK-PDCD1	CRIP1
4.61e-71	0.251178	0.361	0.303	7.08e-67	CD8T_c07-GZMK-PDCD1	PBXIP1
2.28e-61	0.255962	0.39	0.338	3.5e-57	CD8T_c07-GZMK-PDCD1	ISG15
0	1.60033	0.626	0.111	0	CD8T_c08-LAYN	DUSP4
0	1.57747	0.579	0.07	0	CD8T_c08-LAYN	TNFRSF9
0	1.45629	0.396	0.029	0	CD8T_c08-LAYN	VCAM1
0	1.29438	0.646	0.154	0	CD8T_c08-LAYN	PDCD1
0	1.10947	0.711	0.308	0	CD8T_c08-LAYN	CEMIP2
0	1.09411	0.789	0.426	0	CD8T_c08-LAYN	ITM2A
0	1.08688	0.393	0.038	0	CD8T_c08-LAYN	CTLA4
0	1.08153	0.277	0.015	0	CD8T_c08-LAYN	GEM
0	1.07296	0.599	0.191	0	CD8T_c08-LAYN	TIGIT
0	1.04099	0.956	0.497	0	CD8T_c08-LAYN	CREM
0	1.03937	0.661	0.261	0	CD8T_c08-LAYN	SRRT
0	1.03767	0.666	0.3	0	CD8T_c08-LAYN	RNF19A
0	1.02315	0.289	0.013	0	CD8T_c08-LAYN	LAYN
0	0.9574	0.369	0.154	0	CD8T_c08-LAYN	CRTAM
0	0.946978	0.582	0.212	0	CD8T_c08-LAYN	LYST
0	0.946819	0.724	0.279	0	CD8T_c08-LAYN	RGS1
0	0.924343	0.548	0.227	0	CD8T_c08-LAYN	CXCR6
[truncated: 2,130 more rows]

## Sheet: CD4 T
p_val	avg_logFC	pct.1	pct.2	p_val_adj	cluster	gene
0	0.822748	0.718	0.344	0	CD4T_c01-LEF1	LEF1
0	0.70755	0.756	0.427	0	CD4T_c01-LEF1	TCF7
0	0.638172	0.684	0.426	0	CD4T_c01-LEF1	LINC00861
0	0.638125	0.83	0.457	0	CD4T_c01-LEF1	SELL
0	0.59091	0.447	0.23	0	CD4T_c01-LEF1	TGFBR2
0	0.583408	0.652	0.404	0	CD4T_c01-LEF1	PIK3IP1
0	0.569702	0.732	0.365	0	CD4T_c01-LEF1	CCR7
0	0.567719	0.695	0.484	0	CD4T_c01-LEF1	RIPOR2
0	0.566881	0.288	0.057	0	CD4T_c01-LEF1	AIF1
0	0.5347	0.488	0.267	0	CD4T_c01-LEF1	IL6ST
0	0.532118	0.606	0.395	0	CD4T_c01-LEF1	CAMK4
0	0.525338	0.775	0.542	0	CD4T_c01-LEF1	NOSIP
0	0.516932	0.31	0.09	0	CD4T_c01-LEF1	ACTN1
0	0.507028	0.469	0.279	0	CD4T_c01-LEF1	ATM
0	0.494839	0.352	0.143	0	CD4T_c01-LEF1	TRABD2A
0	0.48673	0.447	0.242	0	CD4T_c01-LEF1	OXNAD1
0	0.480482	0.625	0.425	0	CD4T_c01-LEF1	PRMT2
0	0.471349	1	1	0	CD4T_c01-LEF1	MALAT1
0	0.47117	0.285	0.104	0	CD4T_c01-LEF1	TXK
0	0.466089	0.962	0.708	0	CD4T_c01-LEF1	TXNIP
0	0.458343	0.252	0.079	0	CD4T_c01-LEF1	CHRM3-AS2
0	0.451972	0.373	0.235	0	CD4T_c01-LEF1	PDE3B
0	0.442075	0.277	0.131	0	CD4T_c01-LEF1	MAML2
0	0.429426	0.689	0.53	0	CD4T_c01-LEF1	NDFIP1
0	0.425072	0.603	0.425	0	CD4T_c01-LEF1	FOXP1
0	0.424929	0.255	0.112	0	CD4T_c01-LEF1	NELL2
0	0.423541	0.585	0.358	0	CD4T_c01-LEF1	MAL
0	0.419806	0.394	0.208	0	CD4T_c01-LEF1	LDLRAP1
0	0.412834	0.379	0.191	0	CD4T_c01-LEF1	NUCB2
0	0.412256	0.27	0.101	0	CD4T_c01-LEF1	EPHX2
0	0.409414	0.639	0.454	0	CD4T_c01-LEF1	RGS10
0	0.408354	0.289	0.133	0	CD4T_c01-LEF1	ITGA6
0	0.406876	0.296	0.171	0	CD4T_c01-LEF1	SERINC5
0	0.401624	0.398	0.24	0	CD4T_c01-LEF1	PCED1B
0	0.394213	0.158	0.022	0	CD4T_c01-LEF1	LRRN3
0	0.390128	0.282	0.131	0	CD4T_c01-LEF1	PRKCA
0	0.387988	0.257	0.104	0	CD4T_c01-LEF1	TSHZ2
0	0.3809	0.195	0.042	0	CD4T_c01-LEF1	FHIT
0	0.380026	0.374	0.227	0	CD4T_c01-LEF1	AC119396.1
0	0.374767	0.988	0.991	0	CD4T_c01-LEF1	RPS3A
0	0.373277	0.202	0.041	0	CD4T_c01-LEF1	TMIGD2
0	0.372045	0.982	0.991	0	CD4T_c01-LEF1	RPS13
0	0.371736	0.354	0.196	0	CD4T_c01-LEF1	MYC
0	0.358492	0.445	0.278	0	CD4T_c01-LEF1	AC243960.1
0	0.357908	0.676	0.571	0	CD4T_c01-LEF1	MBNL1
0	0.357334	0.164	0.029	0	CD4T_c01-LEF1	ANKRD55
0	0.355604	0.235	0.099	0	CD4T_c01-LEF1	BACH2
0	0.353369	0.553	0.427	0	CD4T_c01-LEF1	IKZF1
0	0.352249	0.256	0.124	0	CD4T_c01-LEF1	GABPB1-AS1
0	0.349159	0.466	0.304	0	CD4T_c01-LEF1	SNHG7
0	0.348474	0.275	0.145	0	CD4T_c01-LEF1	CHMP7
0	0.345142	0.966	0.958	0	CD4T_c01-LEF1	EEF1B2
0	0.342849	0.644	0.501	0	CD4T_c01-LEF1	PNISR
0	0.339403	0.737	0.566	0	CD4T_c01-LEF1	TRAF3IP3
0	0.327855	0.175	0.046	0	CD4T_c01-LEF1	MDS2
0	0.325681	0.171	0.052	0	CD4T_c01-LEF1	PDK1
0	0.323771	0.238	0.104	0	CD4T_c01-LEF1	LINC01550
0	0.322927	0.429	0.284	0	CD4T_c01-LEF1	ABLIM1
0	0.322021	0.222	0.101	0	CD4T_c01-LEF1	RETREG1
0	0.318003	0.525	0.385	0	CD4T_c01-LEF1	GIMAP1
0	0.317321	0.136	0.013	0	CD4T_c01-LEF1	NOG
0	0.316636	0.156	0.031	0	CD4T_c01-LEF1	AK5
0	0.315725	0.949	0.931	0	CD4T_c01-LEF1	EEF1G
0	0.314181	0.986	0.993	0	CD4T_c01-LEF1	RPS23
0	0.313832	0.972	0.981	0	CD4T_c01-LEF1	RPS5
0	0.307984	0.168	0.052	0	CD4T_c01-LEF1	APBA2
0	0.303505	0.943	0.862	0	CD4T_c01-LEF1	LDHB
0	0.300632	0.964	0.972	0	CD4T_c01-LEF1	RPL22
0	0.299982	0.394	0.233	0	CD4T_c01-LEF1	SATB1
0	0.297846	0.987	0.994	0	CD4T_c01-LEF1	RPL32
0	0.295901	0.82	0.735	0	CD4T_c01-LEF1	EIF3E
0	0.285991	0.823	0.68	0	CD4T_c01-LEF1	GIMAP7
0	0.284716	0.318	0.176	0	CD4T_c01-LEF1	C1orf162
0	0.281545	0.986	0.993	0	CD4T_c01-LEF1	RPS14
0	0.27852	0.885	0.821	0	CD4T_c01-LEF1	NOP53
0	0.270591	0.975	0.984	0	CD4T_c01-LEF1	RPL5
0	0.268612	0.973	0.978	0	CD4T_c01-LEF1	NACA
0	0.265892	0.969	0.975	0	CD4T_c01-LEF1	RPL9
0	0.260434	0.992	0.995	0	CD4T_c01-LEF1	RPS12
0	0.257329	0.994	0.997	0	CD4T_c01-LEF1	RPL13
0	0.251146	0.941	0.921	0	CD4T_c01-LEF1	NPM1
7.04e-306	0.27739	0.205	0.095	1.03e-301	CD4T_c01-LEF1	RIN3
2.49e-287	0.26296	0.664	0.547	3.66e-283	CD4T_c01-LEF1	CCND3
3.48e-282	0.272675	0.269	0.15	5.11e-278	CD4T_c01-LEF1	TMEM204
2.65e-266	0.27248	0.207	0.103	3.89e-262	CD4T_c01-LEF1	ARMH1
3.46e-265	0.25703	0.589	0.464	5.09e-261	CD4T_c01-LEF1	FCMR
1.21e-260	0.268806	0.549	0.437	1.79e-256	CD4T_c01-LEF1	EIF2S3
7.34e-251	0.258859	0.585	0.473	1.08e-246	CD4T_c01-LEF1	MCUB
4.07e-249	0.269716	0.329	0.212	5.98e-245	CD4T_c01-LEF1	EPB41L4A-AS1
1.29e-242	0.274847	0.314	0.2	1.89e-238	CD4T_c01-LEF1	SH3YL1
1.83e-242	0.287137	0.301	0.189	2.7e-238	CD4T_c01-LEF1	CRLF3
2.81e-240	0.257546	0.246	0.14	4.13e-236	CD4T_c01-LEF1	ILF3-DT
1.49e-239	0.311202	0.442	0.325	2.19e-235	CD4T_c01-LEF1	MGAT4A
3.71e-227	0.276827	0.27	0.165	5.46e-223	CD4T_c01-LEF1	MHENCR
2.95e-225	0.300661	0.379	0.266	4.33e-221	CD4T_c01-LEF1	TMC8
6.6e-219	0.279458	0.461	0.35	9.7e-215	CD4T_c01-LEF1	RCAN3
3.27e-205	0.343907	0.537	0.438	4.81e-201	CD4T_c01-LEF1	DDX17
8.01e-204	0.301146	0.408	0.302	1.18e-199	CD4T_c01-LEF1	DGKA
4.28e-199	0.270036	0.339	0.232	6.29e-195	CD4T_c01-LEF1	GIMAP5
5.35e-193	0.317322	0.215	0.127	7.87e-189	CD4T_c01-LEF1	TMEM131L
6.54e-192	0.271508	0.227	0.136	9.61e-188	CD4T_c01-LEF1	SGTB
3.1e-190	0.292801	0.396	0.295	4.56e-186	CD4T_c01-LEF1	LUC7L3
2.58e-182	0.335539	0.512	0.421	3.8e-178	CD4T_c01-LEF1	TC2N
7.81e-181	0.253116	0.365	0.264	1.15e-176	CD4T_c01-LEF1	DENND2D
2.45e-171	0.254584	0.424	0.329	3.6e-167	CD4T_c01-LEF1	TMEM243
3.09e-170	0.313221	0.3	0.209	4.53e-166	CD4T_c01-LEF1	SSH2
2.46e-167	0.275049	0.355	0.261	3.62e-163	CD4T_c01-LEF1	ZRANB2
2.15e-164	0.30108	0.188	0.11	3.17e-160	CD4T_c01-LEF1	STX16
1.55e-148	0.250722	0.167	0.096	2.27e-144	CD4T_c01-LEF1	CREBZF
2.31e-146	0.250584	0.172	0.101	3.4e-142	CD4T_c01-LEF1	CEP95
5.04e-119	0.268081	0.422	0.346	7.41e-115	CD4T_c01-LEF1	ITK
1.35e-113	0.274554	0.358	0.286	1.98e-109	CD4T_c01-LEF1	STK38
3.26e-112	0.265977	0.232	0.159	4.79e-108	CD4T_c01-LEF1	SESN3
1.03e-110	0.307919	0.322	0.252	1.51e-106	CD4T_c01-LEF1	NKTR
4.99e-95	0.263148	0.477	0.418	7.34e-91	CD4T_c01-LEF1	SRSF11
0	0.60565	0.958	0.724	0	CD4T_c02-ANXA2	S100A4
0	0.497855	0.823	0.505	0	CD4T_c02-ANXA2	S100A11
0	0.476213	0.398	0.182	0	CD4T_c02-ANXA2	KLRB1
0	0.464956	0.432	0.185	0	CD4T_c02-ANXA2	TRADD
0	0.442506	0.448	0.212	0	CD4T_c02-ANXA2	TIMP1
0	0.44135	0.603	0.368	0	CD4T_c02-ANXA2	AQP3
0	0.414107	0.623	0.388	0	CD4T_c02-ANXA2	PLP2
0	0.411215	0.363	0.186	0	CD4T_c02-ANXA2	LGALS1
0	0.399632	0.942	0.788	0	CD4T_c02-ANXA2	S100A6
0	0.398372	0.909	0.706	0	CD4T_c02-ANXA2	S100A10
0	0.390782	0.986	0.881	0	CD4T_c02-ANXA2	SH3BGRL3
0	0.388435	0.974	0.884	0	CD4T_c02-ANXA2	LTB
0	0.367833	0.266	0.108	0	CD4T_c02-ANXA2	CRIP2
0	0.353821	0.9	0.711	0	CD4T_c02-ANXA2	EMP3
0	0.348708	0.439	0.211	0	CD4T_c02-ANXA2	ANXA2
0	0.347263	0.728	0.487	0	CD4T_c02-ANXA2	COTL1
0	0.330751	0.24	0.094	0	CD4T_c02-ANXA2	PTGER2
0	0.326465	0.673	0.381	0	CD4T_c02-ANXA2	AHNAK
0	0.319546	0.989	0.935	0	CD4T_c02-ANXA2	CD52
0	0.287082	0.837	0.692	0	CD4T_c02-ANXA2	GSTK1
0	0.283356	0.754	0.593	0	CD4T_c02-ANXA2	NME2
0	0.275401	0.185	0.055	0	CD4T_c02-ANXA2	NSG1
0	0.272593	0.966	0.9	0	CD4T_c02-ANXA2	FXYD5
0	0.265863	0.903	0.779	0	CD4T_c02-ANXA2	IFITM2
0	0.260403	0.911	0.69	0	CD4T_c02-ANXA2	CRIP1
3.29e-291	0.255319	0.329	0.179	4.83e-287	CD4T_c02-ANXA2	LIMS1
2.62e-195	0.25165	0.224	0.123	3.85e-191	CD4T_c02-ANXA2	LYAR
0	3.30847	0.981	0.11	0	CD4T_c03-GNLY	NKG7
0	2.77009	0.729	0.04	0	CD4T_c03-GNLY	GNLY
0	2.72842	0.913	0.035	0	CD4T_c03-GNLY	GZMH
0	2.22874	0.759	0.007	0	CD4T_c03-GNLY	FGFBP2
0	2.13711	0.983	0.213	0	CD4T_c03-GNLY	CCL5
0	1.87115	0.839	0.098	0	CD4T_c03-GNLY	PRF1
0	1.83368	0.94	0.164	0	CD4T_c03-GNLY	GZMA
0	1.64001	0.689	0.048	0	CD4T_c03-GNLY	CCL4
0	1.60731	0.535	0.013	0	CD4T_c03-GNLY	GZMB
0	1.58888	0.944	0.204	0	CD4T_c03-GNLY	CST7
0	1.52073	0.621	0.006	0	CD4T_c03-GNLY	CX3CR1
0	1.4467	0.766	0.15	0	CD4T_c03-GNLY	EFHD2
0	1.40212	0.668	0.033	0	CD4T_c03-GNLY	PLEK
0	1.26186	0.648	0.086	0	CD4T_c03-GNLY	HOPX
0	1.23098	0.709	0.216	0	CD4T_c03-GNLY	LGALS1
0	1.13655	0.676	0.146	0	CD4T_c03-GNLY	C12orf75
0	1.11681	0.651	0.149	0	CD4T_c03-GNLY	HLA-DRB1
0	1.1078	0.309	0.01	0	CD4T_c03-GNLY	TRGV2
0	1.10391	0.993	0.78	0	CD4T_c03-GNLY	S100A4
0	1.03319	0.569	0.181	0	CD4T_c03-GNLY	CTSW
0	1.02791	0.401	0.021	0	CD4T_c03-GNLY	SPON2
0	1.01554	0.75	0.268	0	CD4T_c03-GNLY	CTSC
0	0.992948	0.993	0.906	0	CD4T_c03-GNLY	SH3BGRL3
0	0.987523	0.732	0.235	0	CD4T_c03-GNLY	HLA-DPB1
0	0.960073	0.71	0.219	0	CD4T_c03-GNLY	HLA-DPA1
0	0.952082	0.568	0.117	0	CD4T_c03-GNLY	KLRG1
0	0.933226	0.469	0.037	0	CD4T_c03-GNLY	TBX21
0	0.932689	0.422	0.027	0	CD4T_c03-GNLY	ZEB2
0	0.915342	0.37	0.005	0	CD4T_c03-GNLY	ADGRG1
0	0.85841	0.186	0.003	0	CD4T_c03-GNLY	ZNF683
0	0.854566	0.803	0.411	0	CD4T_c03-GNLY	SLC9A3R1
0	0.839708	0.923	0.657	0	CD4T_c03-GNLY	HCST
0	0.833135	0.897	0.599	0	CD4T_c03-GNLY	ITGB2
0	0.82454	0.763	0.381	0	CD4T_c03-GNLY	FLNA
0	0.824128	0.409	0.064	0	CD4T_c03-GNLY	LINC01871
0	0.822123	0.535	0.143	0	CD4T_c03-GNLY	APOBEC3G
0	0.821809	0.524	0.127	0	CD4T_c03-GNLY	SAMD3
0	0.82087	0.902	0.538	0	CD4T_c03-GNLY	CLIC1
0	0.818503	0.365	0.01	0	CD4T_c03-GNLY	S1PR5
0	0.817334	0.373	0.061	0	CD4T_c03-GNLY	LAIR2
0	0.808308	0.944	0.671	0	CD4T_c03-GNLY	CD99
0	0.798905	0.323	0.002	0	CD4T_c03-GNLY	PRSS23
0	0.7866	0.425	0.052	0	CD4T_c03-GNLY	MATK
0	0.766708	0.749	0.365	0	CD4T_c03-GNLY	GZMM
0	0.73734	0.99	0.949	0	CD4T_c03-GNLY	CD52
0	0.735878	1	0.994	0	CD4T_c03-GNLY	ACTB
0	0.735382	0.475	0.109	0	CD4T_c03-GNLY	MYO1F
0	0.724909	0.304	0.006	0	CD4T_c03-GNLY	FCRL6
0	0.722335	0.95	0.808	0	CD4T_c03-GNLY	IFITM2
0	0.716552	0.44	0.093	0	CD4T_c03-GNLY	CHST12
0	0.713287	0.995	0.962	0	CD4T_c03-GNLY	PFN1
0	0.703491	0.961	0.825	0	CD4T_c03-GNLY	S100A6
0	0.701172	0.596	0.235	0	CD4T_c03-GNLY	GBP5
0	0.697768	0.3	0.005	0	CD4T_c03-GNLY	C1orf21
0	0.695341	0.704	0.328	0	CD4T_c03-GNLY	ITGB1
0	0.689951	0.823	0.541	0	CD4T_c03-GNLY	RAP1B
0	0.679903	0.702	0.361	0	CD4T_c03-GNLY	PAXX
0	0.679266	0.632	0.259	0	CD4T_c03-GNLY	ANXA2
0	0.678915	0.856	0.581	0	CD4T_c03-GNLY	PSMB9
0	0.6787	0.346	0.065	0	CD4T_c03-GNLY	HLA-DRB5
0	0.667726	0.471	0.159	0	CD4T_c03-GNLY	ABHD17A
0	0.663128	0.99	0.912	0	CD4T_c03-GNLY	IL32
0	0.66262	0.29	0.021	0	CD4T_c03-GNLY	ADRB2
0	0.655788	0.405	0.121	0	CD4T_c03-GNLY	CD320
0	0.654528	0.999	0.988	0	CD4T_c03-GNLY	HLA-C
0	0.649744	0.465	0.158	0	CD4T_c03-GNLY	ID2
0	0.645325	0.352	0.071	0	CD4T_c03-GNLY	TGFBR3
0	0.63974	0.384	0.083	0	CD4T_c03-GNLY	TPST2
0	0.617054	0.959	0.786	0	CD4T_c03-GNLY	CYBA
0	0.603962	0.261	0.038	0	CD4T_c03-GNLY	HLA-DQA1
0	0.597518	0.296	0.049	0	CD4T_c03-GNLY	CD300A
0	0.591657	0.358	0.089	0	CD4T_c03-GNLY	MYBL1
0	0.590869	1	1	0	CD4T_c03-GNLY	B2M
0	0.580352	0.939	0.756	0	CD4T_c03-GNLY	EMP3
0	0.578945	0.986	0.923	0	CD4T_c03-GNLY	MYL12A
0	0.567614	0.299	0.051	0	CD4T_c03-GNLY	ABI3
0	0.560389	0.118	0.003	0	CD4T_c03-GNLY	TRGV8
0	0.52587	0.98	0.92	0	CD4T_c03-GNLY	CFL1
0	0.511859	0.204	0.005	0	CD4T_c03-GNLY	LINC02384
0	0.426264	0.187	0.013	0	CD4T_c03-GNLY	PTGDR
0	0.425345	0.174	0.024	0	CD4T_c03-GNLY	CLIC3
0	0.4103	0.171	0.006	0	CD4T_c03-GNLY	ITGAM
0	0.407821	0.183	0.022	0	CD4T_c03-GNLY	PRR5L
0	0.391928	0.17	0.005	0	CD4T_c03-GNLY	FGR
0	0.383373	0.103	0.007	0	CD4T_c03-GNLY	KLRD1
0	0.378963	1	0.997	0	CD4T_c03-GNLY	MT-CO1
0	0.37226	1	0.992	0	CD4T_c03-GNLY	HLA-A
0	0.345082	0.144	0.011	0	CD4T_c03-GNLY	TRGC2
0	0.344342	0.15	0.016	0	CD4T_c03-GNLY	EOMES
0	0.336755	0.127	0.003	0	CD4T_c03-GNLY	ASCL2
0	0.319212	0.122	0.003	0	CD4T_c03-GNLY	PROK2
0	0.318352	0.14	0.009	0	CD4T_c03-GNLY	SLAMF7
0	0.314544	0.11	0.002	0	CD4T_c03-GNLY	CES1
7.59e-306	0.592848	0.418	0.132	1.12e-301	CD4T_c03-GNLY	PYHIN1
9.38e-305	0.640826	0.798	0.487	1.38e-300	CD4T_c03-GNLY	PPP1CA
2.59e-302	0.697408	0.7	0.367	3.81e-298	CD4T_c03-GNLY	YWHAQ
1.78e-300	0.406362	0.199	0.035	2.62e-296	CD4T_c03-GNLY	LAG3
2.58e-299	0.561478	0.933	0.772	3.79e-295	CD4T_c03-GNLY	ARPC2
2.91e-298	0.322201	0.147	0.02	4.28e-294	CD4T_c03-GNLY	USP28
3.11e-295	0.670737	0.148	0.02	4.57e-291	CD4T_c03-GNLY	CD8A
3.27e-295	0.574887	0.432	0.145	4.81e-291	CD4T_c03-GNLY	APMAP
6.94e-292	0.65532	0.858	0.584	1.02e-287	CD4T_c03-GNLY	CD2
2.64e-290	0.502982	0.973	0.865	3.88e-286	CD4T_c03-GNLY	MYL6
5.98e-286	0.343814	0.176	0.029	8.79e-282	CD4T_c03-GNLY	F2R
2.38e-285	0.553255	0.414	0.135	3.5e-281	CD4T_c03-GNLY	ACTN4
1.87e-284	0.624294	0.531	0.217	2.75e-280	CD4T_c03-GNLY	MYO1G
3.08e-284	0.790176	0.914	0.744	4.52e-280	CD4T_c03-GNLY	CD74
1.04e-280	0.307268	0.998	0.994	1.54e-276	CD4T_c03-GNLY	TMSB4X
2.2e-279	0.357028	0.179	0.03	3.23e-275	CD4T_c03-GNLY	PPP2R2B
1.67e-277	0.498466	0.423	0.137	2.45e-273	CD4T_c03-GNLY	CYTOR
2.86e-276	0.670224	0.325	0.091	4.2e-272	CD4T_c03-GNLY	HLA-DRA
3.85e-273	0.543315	0.402	0.131	5.66e-269	CD4T_c03-GNLY	STOM
1.34e-266	0.613492	0.639	0.32	1.97e-262	CD4T_c03-GNLY	PPP1R18
7.8e-264	0.435383	0.263	0.063	1.15e-259	CD4T_c03-GNLY	MIR4435-2HG
4.92e-262	0.64905	0.835	0.582	7.24e-258	CD4T_c03-GNLY	LY6E
1.19e-257	0.439832	0.233	0.053	1.75e-253	CD4T_c03-GNLY	LPCAT1
3.81e-257	0.505608	0.925	0.769	5.6e-253	CD4T_c03-GNLY	MYL12B
7.79e-255	0.557261	0.421	0.153	1.14e-250	CD4T_c03-GNLY	GLIPR2
2.01e-252	1.65745	0.164	0.029	2.95e-248	CD4T_c03-GNLY	TRBV11-2
3.57e-252	0.345756	0.152	0.024	5.25e-248	CD4T_c03-GNLY	PTMS
1.47e-251	0.532681	0.938	0.754	2.16e-247	CD4T_c03-GNLY	S100A10
6.36e-242	0.596782	0.445	0.172	9.35e-238	CD4T_c03-GNLY	SYNE1
1.34e-241	0.469505	0.291	0.082	1.96e-237	CD4T_c03-GNLY	PLEKHF1
1.78e-236	0.529996	0.42	0.155	2.61e-232	CD4T_c03-GNLY	CDC42EP3
1.13e-233	0.525241	0.865	0.582	1.66e-229	CD4T_c03-GNLY	S100A11
6.39e-232	0.596907	0.733	0.457	9.39e-228	CD4T_c03-GNLY	PTP4A2
1.65e-230	0.357126	0.189	0.04	2.43e-226	CD4T_c03-GNLY	ANXA4
2.02e-230	0.498695	0.903	0.715	2.98e-226	CD4T_c03-GNLY	LSP1
2.42e-228	0.592428	0.672	0.385	3.56e-224	CD4T_c03-GNLY	GSTP1
4.52e-228	0.583692	0.768	0.449	6.64e-224	CD4T_c03-GNLY	AHNAK
1.49e-226	0.540076	0.199	0.044	2.19e-222	CD4T_c03-GNLY	TRGV10
2.58e-224	0.506697	0.931	0.803	3.8e-220	CD4T_c03-GNLY	PSME1
4.27e-224	0.572727	0.19	0.04	6.27e-220	CD4T_c03-GNLY	TRAV12-1
2.71e-223	0.339897	0.994	0.969	3.98e-219	CD4T_c03-GNLY	HLA-E
3.19e-221	0.549224	0.47	0.2	4.69e-217	CD4T_c03-GNLY	SASH3
1.81e-220	0.560223	0.822	0.56	2.66e-216	CD4T_c03-GNLY	LCP1
1.23e-218	0.535953	0.815	0.564	1.81e-214	CD4T_c03-GNLY	LITAF
7.3e-209	0.253468	0.117	0.018	1.07e-204	CD4T_c03-GNLY	PLEKHG3
9.68e-208	0.380955	0.195	0.045	1.42e-203	CD4T_c03-GNLY	TRG-AS1
7.63e-207	0.463272	0.325	0.111	1.12e-202	CD4T_c03-GNLY	CISD3
1.22e-202	0.369911	0.973	0.917	1.8e-198	CD4T_c03-GNLY	CALM1
1.61e-202	0.482153	0.379	0.142	2.37e-198	CD4T_c03-GNLY	LYAR
2.82e-202	0.553122	0.758	0.511	4.14e-198	CD4T_c03-GNLY	CAP1
4.47e-200	0.370379	0.214	0.054	6.57e-196	CD4T_c03-GNLY	OASL
1.89e-194	0.519649	0.666	0.404	2.77e-190	CD4T_c03-GNLY	DBI
1.93e-193	0.468779	0.884	0.684	2.84e-189	CD4T_c03-GNLY	ARPC1B
9.88e-192	0.487088	0.728	0.445	1.45e-187	CD4T_c03-GNLY	TGFB1
4.13e-190	0.528262	0.519	0.254	6.08e-186	CD4T_c03-GNLY	SPN
5.23e-189	0.331696	0.998	0.986	7.69e-185	CD4T_c03-GNLY	TMSB10
5.52e-188	0.368621	0.214	0.057	8.11e-184	CD4T_c03-GNLY	VCL
2.09e-184	0.484858	0.338	0.126	3.07e-180	CD4T_c03-GNLY	RASSF1
2.18e-184	0.517174	0.69	0.429	3.21e-180	CD4T_c03-GNLY	MSN
2.58e-184	0.527341	0.524	0.265	3.79e-180	CD4T_c03-GNLY	DSTN
1.9e-183	0.411188	0.932	0.804	2.8e-179	CD4T_c03-GNLY	RAC2
1.06e-182	0.477289	0.412	0.172	1.55e-178	CD4T_c03-GNLY	ITGAL
6.96e-176	0.333369	0.194	0.05	1.02e-171	CD4T_c03-GNLY	CALHM2
1.13e-174	0.496359	0.523	0.265	1.67e-170	CD4T_c03-GNLY	CAPN2
2.04e-174	0.46289	0.837	0.651	3e-170	CD4T_c03-GNLY	RARRES3
9.85e-174	0.340758	0.175	0.042	1.45e-169	CD4T_c03-GNLY	CEP78
1.29e-173	0.490177	0.449	0.209	1.9e-169	CD4T_c03-GNLY	SSBP4
1.59e-173	0.474392	0.301	0.106	2.34e-169	CD4T_c03-GNLY	CD81
3.61e-173	0.389545	0.939	0.858	5.31e-169	CD4T_c03-GNLY	PTPRCAP
8.71e-172	0.286141	0.141	0.029	1.28e-167	CD4T_c03-GNLY	TMEM273
2.33e-171	0.302633	0.165	0.039	3.42e-167	CD4T_c03-GNLY	FUT11
3.24e-171	0.475011	0.459	0.215	4.76e-167	CD4T_c03-GNLY	ARPC5L
1.14e-170	0.317419	0.975	0.907	1.67e-166	CD4T_c03-GNLY	GAPDH
8.18e-170	0.411522	0.9	0.761	1.2e-165	CD4T_c03-GNLY	ARPC3
4.69e-169	0.374969	0.992	0.961	6.89e-165	CD4T_c03-GNLY	IFITM1
5.18e-169	0.499076	0.713	0.475	7.62e-165	CD4T_c03-GNLY	CD53
1.92e-167	0.577513	0.67	0.429	2.82e-163	CD4T_c03-GNLY	IL2RG
1.65e-165	0.252669	0.134	0.027	2.43e-161	CD4T_c03-GNLY	MCTP2
2.19e-165	0.492169	0.722	0.489	3.22e-161	CD4T_c03-GNLY	ANXA6
8.08e-165	0.390879	0.108	0.019	1.19e-160	CD4T_c03-GNLY	CD8B
1.23e-162	0.465256	0.485	0.238	1.81e-158	CD4T_c03-GNLY	DOK2
1.32e-162	0.383331	0.903	0.781	1.94e-158	CD4T_c03-GNLY	RHOA
9.34e-160	0.406905	0.273	0.095	1.37e-155	CD4T_c03-GNLY	APOBEC3C
1.04e-157	0.382948	0.95	0.872	1.53e-153	CD4T_c03-GNLY	CORO1A
3.67e-157	0.444547	0.361	0.152	5.39e-153	CD4T_c03-GNLY	RAB29
1.13e-156	0.426472	0.349	0.141	1.65e-152	CD4T_c03-GNLY	SLAMF1
6.27e-156	0.437803	0.972	0.933	9.22e-152	CD4T_c03-GNLY	ACTG1
2.04e-154	0.395051	0.298	0.109	2.99e-150	CD4T_c03-GNLY	PRDM1
1.92e-151	0.462582	0.58	0.337	2.82e-147	CD4T_c03-GNLY	DHRS7
2.66e-151	0.324167	0.198	0.057	3.91e-147	CD4T_c03-GNLY	BCL2L1
7.04e-150	0.404273	0.859	0.699	1.03e-145	CD4T_c03-GNLY	PPIB
5.17e-148	0.305015	0.969	0.923	7.6e-144	CD4T_c03-GNLY	SERF2
1.29e-147	0.419883	0.104	0.019	1.9e-143	CD4T_c03-GNLY	TRAV1-1
2.92e-147	0.429571	0.44	0.214	4.29e-143	CD4T_c03-GNLY	CCDC107
5.77e-147	0.271236	0.148	0.035	8.47e-143	CD4T_c03-GNLY	TSPAN2
5.05e-145	0.451698	0.463	0.233	7.42e-141	CD4T_c03-GNLY	CDK2AP2
2.79e-144	0.637353	0.464	0.232	4.09e-140	CD4T_c03-GNLY	KLRB1
9.33e-143	0.433371	0.37	0.163	1.37e-138	CD4T_c03-GNLY	THEMIS
4.54e-142	0.469392	0.533	0.303	6.67e-138	CD4T_c03-GNLY	OSTF1
9.86e-142	0.39227	0.263	0.096	1.45e-137	CD4T_c03-GNLY	ADAM8
6.95e-141	0.450257	0.676	0.449	1.02e-136	CD4T_c03-GNLY	BIN2
1.44e-140	0.264114	0.142	0.034	2.11e-136	CD4T_c03-GNLY	MIAT
9.82e-140	0.308931	0.971	0.918	1.44e-135	CD4T_c03-GNLY	ATP5F1E
4.92e-138	0.441558	0.526	0.295	7.23e-134	CD4T_c03-GNLY	ARRB2
1.05e-137	0.463021	0.663	0.433	1.54e-133	CD4T_c03-GNLY	RNF213
4.13e-136	0.409239	0.558	0.311	6.07e-132	CD4T_c03-GNLY	IL10RA
4.95e-136	0.267429	0.14	0.034	7.27e-132	CD4T_c03-GNLY	TGFBR1
2.51e-135	0.348239	0.254	0.092	3.69e-131	CD4T_c03-GNLY	AGTRAP
1.15e-134	0.350129	0.261	0.095	1.69e-130	CD4T_c03-GNLY	RAB27A
1.19e-134	0.455835	0.543	0.307	1.75e-130	CD4T_c03-GNLY	TAP1
2.62e-133	0.262485	0.135	0.032	3.85e-129	CD4T_c03-GNLY	GK5
1.69e-132	0.423437	0.437	0.22	2.48e-128	CD4T_c03-GNLY	IDH2
1.74e-131	0.430084	0.57	0.334	2.55e-127	CD4T_c03-GNLY	CLEC2B
4.64e-131	0.337797	0.197	0.062	6.81e-127	CD4T_c03-GNLY	PATL2
7.73e-130	0.408313	0.372	0.171	1.14e-125	CD4T_c03-GNLY	ZBTB38
1.06e-129	0.260567	0.985	0.954	1.56e-125	CD4T_c03-GNLY	PPIA
9.4e-128	0.495001	0.344	0.158	1.38e-123	CD4T_c03-GNLY	GBP1
1.17e-127	0.378666	0.541	0.303	1.72e-123	CD4T_c03-GNLY	GNG2
9.09e-127	0.40422	0.384	0.183	1.34e-122	CD4T_c03-GNLY	CASP1
2.08e-126	0.443175	0.676	0.471	3.06e-122	CD4T_c03-GNLY	PSMB8
4.05e-126	0.401813	0.366	0.172	5.96e-122	CD4T_c03-GNLY	PXN
4.05e-125	0.380727	0.289	0.119	5.95e-121	CD4T_c03-GNLY	ACAA2
4.8e-125	0.411151	0.38	0.184	7.05e-121	CD4T_c03-GNLY	FBXW5
2.98e-124	0.463387	0.252	0.097	4.38e-120	CD4T_c03-GNLY	CMC1
9.47e-124	0.387111	0.554	0.319	1.39e-119	CD4T_c03-GNLY	SYNE2
9.71e-123	0.390158	0.354	0.163	1.43e-118	CD4T_c03-GNLY	CD63
2.61e-122	0.356626	0.304	0.127	3.83e-118	CD4T_c03-GNLY	PTGER2
1.11e-121	0.369006	0.328	0.143	1.63e-117	CD4T_c03-GNLY	ATP2B4
1.45e-121	0.433478	0.658	0.452	2.13e-117	CD4T_c03-GNLY	PSMB10
1.97e-121	0.422253	0.477	0.268	2.9e-117	CD4T_c03-GNLY	SCP2
2.11e-121	0.39418	0.581	0.349	3.11e-117	CD4T_c03-GNLY	TXN
2.64e-120	0.29744	0.997	0.989	3.88e-116	CD4T_c03-GNLY	HLA-B
9.06e-119	0.289984	0.72	0.468	1.33e-114	CD4T_c03-GNLY	KLF6
9.7e-119	0.424977	0.459	0.246	1.43e-114	CD4T_c03-GNLY	ANXA5
2.41e-118	0.409198	0.526	0.309	3.55e-114	CD4T_c03-GNLY	TBCB
1.62e-117	0.405387	0.656	0.44	2.39e-113	CD4T_c03-GNLY	SELPLG
1.14e-115	0.355885	0.842	0.699	1.68e-111	CD4T_c03-GNLY	TPM3
3.04e-114	0.436995	0.719	0.541	4.46e-110	CD4T_c03-GNLY	PSME2
5.2e-113	0.38357	0.477	0.265	7.64e-109	CD4T_c03-GNLY	IQGAP1
3.23e-112	0.356277	0.291	0.126	4.74e-108	CD4T_c03-GNLY	RPS6KA1
1.05e-111	0.360168	0.371	0.179	1.55e-107	CD4T_c03-GNLY	GPR65
1.16e-111	0.321713	0.924	0.825	1.7e-107	CD4T_c03-GNLY	CD3D
2.95e-111	0.409767	0.599	0.391	4.33e-107	CD4T_c03-GNLY	WDR1
3.41e-111	0.411132	0.653	0.447	5.02e-107	CD4T_c03-GNLY	ARPC5
9.07e-111	0.348684	0.307	0.136	1.33e-106	CD4T_c03-GNLY	DNAJC1
9.9e-111	0.424695	0.607	0.397	1.45e-106	CD4T_c03-GNLY	XBP1
2.55e-109	0.309274	0.495	0.282	3.74e-105	CD4T_c03-GNLY	CARD16
2.8e-108	0.392193	0.479	0.272	4.11e-104	CD4T_c03-GNLY	CFLAR
2.94e-108	0.39616	0.465	0.263	4.32e-104	CD4T_c03-GNLY	ITGB7
9.33e-106	0.385535	0.367	0.185	1.37e-101	CD4T_c03-GNLY	AC116366.3
1.95e-104	0.318061	0.281	0.121	2.87e-100	CD4T_c03-GNLY	RUNX3
1.99e-104	0.295182	0.228	0.088	2.93e-100	CD4T_c03-GNLY	CD58
3.06e-103	0.329514	0.131	0.037	4.5e-99	CD4T_c03-GNLY	TRGV3
4.61e-103	0.362198	0.534	0.328	6.77e-99	CD4T_c03-GNLY	BSG
1.64e-102	0.40798	0.47	0.268	2.41e-98	CD4T_c03-GNLY	TLN1
3.06e-102	0.30929	0.24	0.097	4.5e-98	CD4T_c03-GNLY	TNFRSF1A
3.95e-102	0.401224	0.714	0.536	5.8e-98	CD4T_c03-GNLY	CALR
5.17e-102	0.310536	0.201	0.074	7.6e-98	CD4T_c03-GNLY	LAIR1
1.35e-101	0.317845	0.221	0.086	1.98e-97	CD4T_c03-GNLY	SLAMF6
4.18e-101	0.389303	0.691	0.508	6.15e-97	CD4T_c03-GNLY	PDIA3
7.9e-101	0.366732	0.409	0.22	1.16e-96	CD4T_c03-GNLY	RASAL3
1.18e-100	0.362489	0.375	0.195	1.74e-96	CD4T_c03-GNLY	MIEN1
9.21e-100	0.276209	0.199	0.073	1.35e-95	CD4T_c03-GNLY	ZBP1
2.08e-99	0.389172	0.683	0.497	3.05e-95	CD4T_c03-GNLY	ACTR3
2.99e-99	0.388531	0.465	0.27	4.39e-95	CD4T_c03-GNLY	RNF167
6.68e-99	0.348121	0.348	0.175	9.82e-95	CD4T_c03-GNLY	PYCARD
2.04e-98	0.361247	0.789	0.634	3e-94	CD4T_c03-GNLY	CD3G
4.46e-98	0.268927	0.169	0.057	6.55e-94	CD4T_c03-GNLY	SYTL2
1.07e-97	0.322182	0.265	0.116	1.57e-93	CD4T_c03-GNLY	RNPEPL1
1.4e-97	0.38256	0.552	0.353	2.06e-93	CD4T_c03-GNLY	CSK
6.1e-97	0.356497	0.38	0.199	8.96e-93	CD4T_c03-GNLY	RGS19
7.14e-97	0.353438	0.704	0.526	1.05e-92	CD4T_c03-GNLY	GUK1
6.11e-96	0.378589	0.67	0.481	8.98e-92	CD4T_c03-GNLY	SUN2
4.58e-95	0.347591	0.384	0.205	6.72e-91	CD4T_c03-GNLY	FERMT3
1.69e-94	0.39303	0.501	0.31	2.48e-90	CD4T_c03-GNLY	UBE2L6
3.31e-94	0.355186	0.352	0.182	4.86e-90	CD4T_c03-GNLY	VASP
4.62e-94	0.289406	0.898	0.786	6.79e-90	CD4T_c03-GNLY	YWHAZ
5.08e-94	0.33559	0.776	0.619	7.47e-90	CD4T_c03-GNLY	UBL5
3.68e-92	0.265237	0.942	0.873	5.4e-88	CD4T_c03-GNLY	TMA7
2.67e-90	0.360787	0.382	0.211	3.92e-86	CD4T_c03-GNLY	ARL5A
4.81e-90	0.321711	0.309	0.15	7.08e-86	CD4T_c03-GNLY	TSEN54
1.09e-89	0.300918	0.233	0.098	1.6e-85	CD4T_c03-GNLY	CD226
3.81e-89	0.311414	0.575	0.363	5.59e-85	CD4T_c03-GNLY	ITGA4
4.88e-89	0.291303	0.22	0.09	7.17e-85	CD4T_c03-GNLY	RAB37
8.12e-89	0.337953	0.336	0.173	1.19e-84	CD4T_c03-GNLY	ARPC4
1.25e-88	0.296803	0.924	0.801	1.84e-84	CD4T_c03-GNLY	KLF2
3.48e-88	0.314984	0.332	0.166	5.11e-84	CD4T_c03-GNLY	ERN1
5.32e-88	0.345254	0.438	0.255	7.82e-84	CD4T_c03-GNLY	PDIA6
5.6e-88	0.327213	0.344	0.177	8.23e-84	CD4T_c03-GNLY	PTPN4
5.69e-88	0.318904	0.265	0.122	8.36e-84	CD4T_c03-GNLY	MRPL10
2.72e-87	0.310845	0.807	0.66	4e-83	CD4T_c03-GNLY	CAPZB
3.75e-87	0.250437	0.175	0.063	5.51e-83	CD4T_c03-GNLY	RHOC
5.02e-86	0.374604	0.463	0.279	7.38e-82	CD4T_c03-GNLY	PLAC8
3.75e-85	0.372662	0.596	0.402	5.51e-81	CD4T_c03-GNLY	IRF1
3.89e-85	0.555885	0.106	0.029	5.72e-81	CD4T_c03-GNLY	TRBV29-1
5.15e-85	0.289367	0.224	0.094	7.57e-81	CD4T_c03-GNLY	MAF
5.76e-85	0.257119	0.918	0.813	8.46e-81	CD4T_c03-GNLY	OAZ1
5.78e-85	0.448406	0.533	0.345	8.49e-81	CD4T_c03-GNLY	STAT1
1.01e-84	0.353404	0.495	0.311	1.48e-80	CD4T_c03-GNLY	BTN3A2
1.16e-84	0.352617	0.656	0.485	1.7e-80	CD4T_c03-GNLY	HLA-F
1.2e-84	0.305563	0.258	0.119	1.76e-80	CD4T_c03-GNLY	CYB561D2
1.5e-83	0.334623	0.402	0.231	2.2e-79	CD4T_c03-GNLY	RAB1B
2.06e-83	0.332902	0.425	0.246	3.03e-79	CD4T_c03-GNLY	REEP5
3.24e-83	0.327934	0.554	0.366	4.76e-79	CD4T_c03-GNLY	SRSF9
1.74e-82	0.30482	0.799	0.653	2.56e-78	CD4T_c03-GNLY	LCK
2.05e-82	0.362519	0.539	0.354	3.02e-78	CD4T_c03-GNLY	GNAI2
2.18e-82	0.281372	0.227	0.099	3.21e-78	CD4T_c03-GNLY	SMIM29
4.84e-81	0.314836	0.391	0.218	7.11e-77	CD4T_c03-GNLY	DIAPH1
6.67e-81	0.300978	0.791	0.64	9.8e-77	CD4T_c03-GNLY	ARL6IP5
9.09e-79	0.269308	0.953	0.903	1.34e-74	CD4T_c03-GNLY	MT-ND4
9.33e-79	0.323521	0.343	0.185	1.37e-74	CD4T_c03-GNLY	FKBP11
2.44e-78	0.273383	0.955	0.808	3.59e-74	CD4T_c03-GNLY	TXNIP
3.13e-78	0.354032	0.577	0.407	4.6e-74	CD4T_c03-GNLY	ATP5ME
3.2e-78	0.31226	0.655	0.49	4.71e-74	CD4T_c03-GNLY	BRK1
8.45e-78	0.298901	0.366	0.201	1.24e-73	CD4T_c03-GNLY	NFATC2
8.69e-78	0.275603	0.392	0.216	1.28e-73	CD4T_c03-GNLY	SH2D2A
1e-77	0.337841	0.749	0.576	1.48e-73	CD4T_c03-GNLY	GIMAP4
1.02e-77	0.321686	0.549	0.366	1.5e-73	CD4T_c03-GNLY	CAST
1.12e-77	0.346799	0.444	0.274	1.64e-73	CD4T_c03-GNLY	SRI
1.71e-77	0.270229	0.493	0.306	2.52e-73	CD4T_c03-GNLY	ADGRE5
2.6e-77	0.293925	0.294	0.149	3.82e-73	CD4T_c03-GNLY	PQLC3
3.72e-77	0.267483	0.237	0.107	5.47e-73	CD4T_c03-GNLY	IGF2R
6.79e-77	0.318328	0.668	0.505	9.98e-73	CD4T_c03-GNLY	2021-09-07
2.29e-76	0.314529	0.595	0.42	3.37e-72	CD4T_c03-GNLY	PGAM1
2e-75	0.321087	0.455	0.281	2.93e-71	CD4T_c03-GNLY	BST2
6.62e-75	0.290581	0.827	0.7	9.73e-71	CD4T_c03-GNLY	SUB1
7.91e-75	0.33255	0.544	0.367	1.16e-70	CD4T_c03-GNLY	P4HB
1.22e-74	0.258305	0.234	0.106	1.8e-70	CD4T_c03-GNLY	PREX1
1.27e-74	0.33093	0.587	0.41	1.86e-70	CD4T_c03-GNLY	ARL4C
2.84e-74	0.330836	0.475	0.308	4.17e-70	CD4T_c03-GNLY	FAM49B
8.83e-74	0.309917	0.428	0.258	1.3e-69	CD4T_c03-GNLY	SIT1
1.06e-73	0.317679	0.551	0.377	1.56e-69	CD4T_c03-GNLY	SHISA5
1.89e-73	0.305775	0.49	0.316	2.78e-69	CD4T_c03-GNLY	POMP
3.61e-73	0.295688	0.717	0.564	5.31e-69	CD4T_c03-GNLY	KRTCAP2
1.58e-72	0.273169	0.212	0.095	2.32e-68	CD4T_c03-GNLY	EBP
1.25e-70	0.275624	0.197	0.086	1.84e-66	CD4T_c03-GNLY	NSG1
1.77e-70	0.301527	0.626	0.465	2.59e-66	CD4T_c03-GNLY	ATP5MF
5.95e-70	0.289993	0.512	0.331	8.74e-66	CD4T_c03-GNLY	DYNLL1
1.01e-69	0.293773	0.619	0.447	1.49e-65	CD4T_c03-GNLY	GNG5
1.92e-69	0.320196	0.581	0.419	2.81e-65	CD4T_c03-GNLY	GNB2
1.95e-69	0.257493	0.23	0.108	2.87e-65	CD4T_c03-GNLY	GYG1
3.2e-69	0.307555	0.397	0.239	4.71e-65	CD4T_c03-GNLY	STK10
3.6e-69	0.28971	0.303	0.159	5.29e-65	CD4T_c03-GNLY	IKZF3
9.68e-69	0.31811	0.325	0.182	1.42e-64	CD4T_c03-GNLY	IFI27L2
3.07e-68	0.321513	0.547	0.386	4.52e-64	CD4T_c03-GNLY	ARF6
3.14e-68	0.302688	0.441	0.28	4.62e-64	CD4T_c03-GNLY	MGST3
6.61e-68	0.299155	0.726	0.591	9.72e-64	CD4T_c03-GNLY	CCND3
7.25e-68	0.299173	0.589	0.426	1.06e-63	CD4T_c03-GNLY	TMEM50A
6.17e-67	0.271231	0.243	0.118	9.06e-63	CD4T_c03-GNLY	CAPNS1
1.08e-66	0.331608	0.495	0.336	1.59e-62	CD4T_c03-GNLY	S1PR1
2.66e-66	0.308146	0.608	0.449	3.91e-62	CD4T_c03-GNLY	TRAPPC1
3.28e-66	0.3328	0.407	0.254	4.81e-62	CD4T_c03-GNLY	CASP4
3.44e-66	0.284381	0.323	0.178	5.06e-62	CD4T_c03-GNLY	PRKCB
9.81e-66	0.291042	0.569	0.407	1.44e-61	CD4T_c03-GNLY	LCP2
1.73e-65	0.250144	0.215	0.101	2.55e-61	CD4T_c03-GNLY	MYD88
2.89e-65	0.265112	0.294	0.157	4.24e-61	CD4T_c03-GNLY	PDLIM2
1.58e-64	0.30449	0.387	0.236	2.32e-60	CD4T_c03-GNLY	CTDSP1
4.43e-64	0.290463	0.69	0.544	6.5e-60	CD4T_c03-GNLY	NDUFA1
4.43e-64	0.303674	0.703	0.574	6.51e-60	CD4T_c03-GNLY	PRR13
4.59e-64	0.283956	0.274	0.144	6.74e-60	CD4T_c03-GNLY	MAPK1
4.82e-63	0.308286	0.39	0.239	7.09e-59	CD4T_c03-GNLY	CD40LG
1.08e-62	0.25801	0.228	0.111	1.59e-58	CD4T_c03-GNLY	CYTH4
1.2e-62	0.262252	0.269	0.14	1.76e-58	CD4T_c03-GNLY	UBE2E3
1.75e-62	0.282622	0.352	0.206	2.57e-58	CD4T_c03-GNLY	RNF166
5.6e-62	0.27744	0.496	0.332	8.23e-58	CD4T_c03-GNLY	PPP2R5C
9.76e-62	0.308199	0.576	0.421	1.43e-57	CD4T_c03-GNLY	TAPBP
1.48e-61	0.299535	0.661	0.513	2.18e-57	CD4T_c03-GNLY	ATP5MD
1.52e-61	0.29014	0.503	0.351	2.23e-57	CD4T_c03-GNLY	PRELID1
4.3e-61	0.276616	0.57	0.408	6.32e-57	CD4T_c03-GNLY	RABAC1
6.47e-61	0.2771	0.415	0.266	9.51e-57	CD4T_c03-GNLY	TMED9
8.86e-61	0.299859	0.462	0.309	1.3e-56	CD4T_c03-GNLY	COPS9
9.69e-61	0.293716	0.451	0.3	1.42e-56	CD4T_c03-GNLY	UBE2L3
1.72e-60	0.264894	0.701	0.56	2.52e-56	CD4T_c03-GNLY	PSMA7
5.08e-60	0.280576	0.521	0.362	7.46e-56	CD4T_c03-GNLY	WAS
5.42e-60	0.267428	0.63	0.465	7.96e-56	CD4T_c03-GNLY	POLR2L
1.19e-59	0.27074	0.282	0.153	1.75e-55	CD4T_c03-GNLY	NFATC3
1.65e-59	0.300937	0.614	0.462	2.42e-55	CD4T_c03-GNLY	NDUFB2
2.02e-59	0.268029	0.32	0.185	2.96e-55	CD4T_c03-GNLY	TADA3
2.23e-59	0.312238	0.494	0.344	3.28e-55	CD4T_c03-GNLY	ZYX
2.92e-59	0.279959	0.58	0.424	4.29e-55	CD4T_c03-GNLY	COX7B
3.03e-59	0.278171	0.273	0.148	4.45e-55	CD4T_c03-GNLY	MFSD10
5.23e-59	0.284033	0.6	0.447	7.68e-55	CD4T_c03-GNLY	ARHGDIA
3.07e-58	0.258623	0.24	0.124	4.51e-54	CD4T_c03-GNLY	PTPN18
4.07e-58	0.278941	0.366	0.223	5.98e-54	CD4T_c03-GNLY	VAMP5
5.23e-58	0.25064	0.249	0.129	7.69e-54	CD4T_c03-GNLY	ZBTB7A
7.86e-58	0.270244	0.331	0.194	1.16e-53	CD4T_c03-GNLY	TMEM109
7.89e-58	0.260492	0.358	0.216	1.16e-53	CD4T_c03-GNLY	RAB5IF
1.66e-57	0.310181	0.412	0.264	2.44e-53	CD4T_c03-GNLY	ARHGAP30
3.77e-57	0.271659	0.381	0.236	5.55e-53	CD4T_c03-GNLY	JPT1
1.25e-56	0.285581	0.333	0.197	1.84e-52	CD4T_c03-GNLY	SH3BP5
1.7e-56	0.279059	0.584	0.436	2.5e-52	CD4T_c03-GNLY	DRAP1
3.24e-56	0.257045	0.62	0.467	4.77e-52	CD4T_c03-GNLY	VAMP8
4.09e-56	0.269385	0.277	0.154	6e-52	CD4T_c03-GNLY	BCL7C
1.73e-55	0.259785	0.391	0.244	2.54e-51	CD4T_c03-GNLY	IFI16
4.06e-55	0.265889	0.501	0.352	5.97e-51	CD4T_c03-GNLY	PSMB3
3.29e-54	0.260819	0.387	0.242	4.83e-50	CD4T_c03-GNLY	IQGAP2
6.45e-54	0.25552	0.4	0.254	9.47e-50	CD4T_c03-GNLY	AKNA
8.15e-54	0.282019	0.429	0.286	1.2e-49	CD4T_c03-GNLY	ORAI1
9.99e-54	0.252854	0.785	0.674	1.47e-49	CD4T_c03-GNLY	UQCR11
1.68e-53	0.289619	0.382	0.244	2.46e-49	CD4T_c03-GNLY	SUPT4H1
2.07e-53	0.267248	0.387	0.249	3.04e-49	CD4T_c03-GNLY	NAA38
3.08e-53	0.251542	0.292	0.165	4.53e-49	CD4T_c03-GNLY	PTPN7
4.89e-52	0.275485	0.442	0.301	7.19e-48	CD4T_c03-GNLY	RHOF
7.92e-52	0.272133	0.53	0.386	1.16e-47	CD4T_c03-GNLY	ZAP70
1.04e-51	0.325772	0.469	0.329	1.53e-47	CD4T_c03-GNLY	BAX
1.17e-51	0.254015	0.465	0.318	1.72e-47	CD4T_c03-GNLY	FMNL1
3.39e-51	0.277923	0.573	0.432	4.98e-47	CD4T_c03-GNLY	NDUFA3
9.46e-51	0.254839	0.58	0.434	1.39e-46	CD4T_c03-GNLY	SEC61G
2.52e-50	0.250311	0.556	0.409	3.7e-46	CD4T_c03-GNLY	PSAP
4.45e-49	0.279189	0.438	0.302	6.55e-45	CD4T_c03-GNLY	SYTL1
7.21e-49	0.250129	0.644	0.505	1.06e-44	CD4T_c03-GNLY	TMEM258
7.35e-49	0.26693	0.361	0.232	1.08e-44	CD4T_c03-GNLY	PSMB2
1.21e-48	0.262814	0.521	0.377	1.78e-44	CD4T_c03-GNLY	SPCS2
1.24e-48	0.26188	0.305	0.186	1.82e-44	CD4T_c03-GNLY	SHKBP1
1.53e-48	0.25113	0.268	0.154	2.25e-44	CD4T_c03-GNLY	TNFSF12
1.85e-48	0.256485	0.529	0.394	2.72e-44	CD4T_c03-GNLY	NDUFB10
5.69e-48	0.254909	0.318	0.194	8.36e-44	CD4T_c03-GNLY	C4orf48
2.82e-47	0.256912	0.569	0.435	4.15e-43	CD4T_c03-GNLY	NEDD8
5.74e-47	0.270688	0.451	0.316	8.44e-43	CD4T_c03-GNLY	NOP10
3.52e-46	0.259037	0.52	0.387	5.17e-42	CD4T_c03-GNLY	BIN1
5e-46	0.263967	0.286	0.172	7.34e-42	CD4T_c03-GNLY	GSDMD
1.65e-45	0.285993	0.493	0.353	2.42e-41	CD4T_c03-GNLY	PIM1
1.77e-45	0.264612	0.263	0.151	2.6e-41	CD4T_c03-GNLY	GBP4
6.53e-45	0.257863	0.483	0.35	9.6e-41	CD4T_c03-GNLY	PET100
3.18e-44	0.254821	0.413	0.282	4.67e-40	CD4T_c03-GNLY	CDC25B
3.47e-43	0.257157	0.386	0.261	5.11e-39	CD4T_c03-GNLY	TES
1.51e-41	0.251651	0.538	0.412	2.21e-37	CD4T_c03-GNLY	TBC1D10C
1.61e-41	0.268317	0.355	0.234	2.36e-37	CD4T_c03-GNLY	AC004687.1
0	0.939952	0.39	0.027	0	CD4T_c04-FOXP3	FOXP3
0	0.84553	0.293	0.022	0	CD4T_c04-FOXP3	RTKN2
0	0.745474	0.4	0.154	0	CD4T_c04-FOXP3	HLA-DRB1
0	0.723263	0.281	0.019	0	CD4T_c04-FOXP3	IKZF2
0	0.717227	0.427	0.09	0	CD4T_c04-FOXP3	TIGIT
0	0.587109	0.364	0.115	0	CD4T_c04-FOXP3	SHMT2
0	0.582912	0.222	0.014	0	CD4T_c04-FOXP3	FCRL3
0	0.55287	0.237	0.04	0	CD4T_c04-FOXP3	IL2RA
0	0.531611	0.279	0.06	0	CD4T_c04-FOXP3	LAIR2
0	0.494496	0.271	0.074	0	CD4T_c04-FOXP3	STAM
0	0.304029	0.117	0.007	0	CD4T_c04-FOXP3	HACD1
5.21e-271	0.663988	0.274	0.088	7.66e-267	CD4T_c04-FOXP3	HLA-DRA
4.83e-264	0.390591	0.215	0.059	7.09e-260	CD4T_c04-FOXP3	NCF4
2.13e-259	0.303917	0.13	0.024	3.13e-255	CD4T_c04-FOXP3	F5
1.24e-254	0.552585	0.227	0.066	1.82e-250	CD4T_c04-FOXP3	HLA-DRB5
1.22e-221	0.530182	0.549	0.306	1.8e-217	CD4T_c04-FOXP3	IL10RA
1.01e-216	0.370932	0.233	0.074	1.49e-212	CD4T_c04-FOXP3	CTLA4
3.12e-201	0.384805	0.266	0.098	4.59e-197	CD4T_c04-FOXP3	ID3
1.97e-180	0.369468	0.234	0.085	2.89e-176	CD4T_c04-FOXP3	RNF214
9.41e-169	0.337343	0.192	0.063	1.38e-164	CD4T_c04-FOXP3	MIR4435-2HG
5.73e-164	0.414294	0.639	0.438	8.42e-160	CD4T_c04-FOXP3	CD27
2.85e-162	0.43633	0.962	0.912	4.19e-158	CD4T_c04-FOXP3	IL32
3.73e-160	0.370872	0.142	0.04	5.48e-156	CD4T_c04-FOXP3	HLA-DQA1
3.71e-154	0.432085	0.303	0.138	5.45e-150	CD4T_c04-FOXP3	CYTOR
1.79e-151	0.375724	0.794	0.601	2.64e-147	CD4T_c04-FOXP3	SELL
2.56e-149	0.408097	0.127	0.035	3.77e-145	CD4T_c04-FOXP3	HPGD
2.81e-147	0.41864	0.169	0.057	4.14e-143	CD4T_c04-FOXP3	TTN
6.52e-145	0.373673	0.167	0.056	9.58e-141	CD4T_c04-FOXP3	HLA-DQB1
6.66e-139	0.384484	0.64	0.464	9.78e-135	CD4T_c04-FOXP3	RCSD1
4.42e-138	0.352276	0.859	0.755	6.49e-134	CD4T_c04-FOXP3	S100A10
2.24e-137	0.384034	0.914	0.78	3.29e-133	CD4T_c04-FOXP3	S100A4
1e-136	0.404859	0.671	0.506	1.47e-132	CD4T_c04-FOXP3	FCMR
3.47e-135	0.493999	0.419	0.244	5.1e-131	CD4T_c04-FOXP3	HLA-DPB1
1.04e-133	0.41323	0.216	0.088	1.53e-129	CD4T_c04-FOXP3	LGALS3
1.39e-131	0.310204	0.164	0.057	2.04e-127	CD4T_c04-FOXP3	PTTG1
4.17e-129	0.275674	0.152	0.051	6.12e-125	CD4T_c04-FOXP3	OAS1
4.6e-127	0.463146	0.436	0.263	6.76e-123	CD4T_c04-FOXP3	ANXA2
5.44e-124	0.487783	0.391	0.228	7.99e-120	CD4T_c04-FOXP3	HLA-DPA1
3.69e-122	0.28928	0.158	0.056	5.42e-118	CD4T_c04-FOXP3	HLA-DMA
3.34e-121	0.423726	0.521	0.35	4.91e-117	CD4T_c04-FOXP3	USP15
1.36e-117	0.283977	0.192	0.077	2e-113	CD4T_c04-FOXP3	TBC1D4
1.73e-117	0.427872	0.409	0.239	2.55e-113	CD4T_c04-FOXP3	GBP5
1.1e-114	0.260515	0.157	0.056	1.62e-110	CD4T_c04-FOXP3	TOX
3.55e-109	0.309996	0.447	0.28	5.22e-105	CD4T_c04-FOXP3	CARD16
2.36e-106	0.382673	0.152	0.057	3.47e-102	CD4T_c04-FOXP3	CCR4
4.51e-106	0.30696	0.996	0.994	6.63e-102	CD4T_c04-FOXP3	ACTB
1.73e-101	0.272447	0.886	0.821	2.54e-97	CD4T_c04-FOXP3	AES
4.97e-101	0.378393	0.389	0.238	7.3e-97	CD4T_c04-FOXP3	DOK2
5.92e-101	0.295866	0.97	0.963	8.7e-97	CD4T_c04-FOXP3	PFN1
2.76e-100	0.293465	0.401	0.237	4.05e-96	CD4T_c04-FOXP3	TNFRSF1B
4.47e-100	0.29411	0.762	0.629	6.57e-96	CD4T_c04-FOXP3	TRAF3IP3
1.67e-98	0.284649	0.267	0.135	2.46e-94	CD4T_c04-FOXP3	PYHIN1
1.96e-97	0.325776	0.354	0.206	2.88e-93	CD4T_c04-FOXP3	CCM2
4.55e-96	0.52304	0.793	0.748	6.69e-92	CD4T_c04-FOXP3	CD74
1.13e-94	0.324495	0.215	0.101	1.66e-90	CD4T_c04-FOXP3	FAM129A
8.06e-91	0.306798	0.781	0.718	1.19e-86	CD4T_c04-FOXP3	LSP1
7.57e-89	0.329188	0.642	0.522	1.11e-84	CD4T_c04-FOXP3	ISG20
1.87e-86	0.365688	0.729	0.645	2.74e-82	CD4T_c04-FOXP3	UCP2
1.09e-80	0.289745	0.668	0.545	1.6e-76	CD4T_c04-FOXP3	CLIC1
3.35e-80	0.319381	0.418	0.278	4.93e-76	CD4T_c04-FOXP3	CDC25B
6.46e-80	0.339501	0.568	0.441	9.5e-76	CD4T_c04-FOXP3	SELPLG
1.39e-78	0.438875	0.708	0.63	2.04e-74	CD4T_c04-FOXP3	HMGN2
1.17e-74	0.311734	0.575	0.454	1.72e-70	CD4T_c04-FOXP3	SKAP1
8e-72	0.351739	0.92	0.909	1.18e-67	CD4T_c04-FOXP3	GAPDH
1.01e-70	0.268143	0.247	0.138	1.48e-66	CD4T_c04-FOXP3	UBL3
2.71e-67	0.308309	0.358	0.239	3.98e-63	CD4T_c04-FOXP3	GLRX
3.22e-66	0.286921	0.369	0.246	4.73e-62	CD4T_c04-FOXP3	GBP2
8.25e-66	0.353618	0.441	0.317	1.21e-61	CD4T_c04-FOXP3	CLDND1
2.47e-62	0.320437	0.448	0.327	3.63e-58	CD4T_c04-FOXP3	TTC39C
5.28e-60	0.275195	0.426	0.305	7.75e-56	CD4T_c04-FOXP3	THEM4
5.59e-60	0.287341	0.439	0.325	8.22e-56	CD4T_c04-FOXP3	PPP1R18
8.01e-57	0.456225	0.377	0.273	1.18e-52	CD4T_c04-FOXP3	HMGB2
5.58e-54	0.291688	0.47	0.367	8.2e-50	CD4T_c04-FOXP3	S1PR4
3.62e-53	0.313032	0.94	0.934	5.33e-49	CD4T_c04-FOXP3	ACTG1
2.37e-52	0.278902	0.554	0.444	3.48e-48	CD4T_c04-FOXP3	SMCHD1
4.03e-51	0.305895	0.37	0.261	5.93e-47	CD4T_c04-FOXP3	SLFN5
1.06e-50	0.330901	0.468	0.365	1.55e-46	CD4T_c04-FOXP3	TPR
2.63e-49	0.267284	0.569	0.495	3.87e-45	CD4T_c04-FOXP3	PPP1CA
3.7e-49	0.266511	0.592	0.512	5.44e-45	CD4T_c04-FOXP3	CALM3
1.88e-48	0.280984	0.418	0.311	2.76e-44	CD4T_c04-FOXP3	TRAC
3.11e-48	0.253235	0.462	0.357	4.58e-44	CD4T_c04-FOXP3	EPB41
1.44e-47	0.25585	0.463	0.364	2.12e-43	CD4T_c04-FOXP3	RAD21
2.1e-47	0.288077	0.562	0.464	3.09e-43	CD4T_c04-FOXP3	SAMHD1
4.07e-47	0.258465	0.444	0.344	5.98e-43	CD4T_c04-FOXP3	ZYX
5.71e-47	0.26085	0.453	0.336	8.39e-43	CD4T_c04-FOXP3	ITGB1
2.52e-43	0.263801	0.489	0.411	3.71e-39	CD4T_c04-FOXP3	COX5A
4.32e-43	0.250607	0.345	0.249	6.34e-39	CD4T_c04-FOXP3	ANXA5
1.06e-36	0.318521	0.42	0.323	1.56e-32	CD4T_c04-FOXP3	SYNE2
8.22e-31	0.252115	0.215	0.147	1.21e-26	CD4T_c04-FOXP3	CRIP2
1.4e-26	0.343969	0.301	0.23	2.06e-22	CD4T_c04-FOXP3	LGALS1
2.46e-14	0.265152	0.523	0.492	3.62e-10	CD4T_c04-FOXP3	TUBB
9.89e-07	0.349391	0.135	0.109	0.0145352	CD4T_c04-FOXP3	TRBV20-1
9.05e-05	0.390906	0.17	0.153	1	CD4T_c04-FOXP3	STMN1
0	1.40115	0.751	0.159	0	CD4T_c05-CCR7	NR4A2
0	1.32414	0.793	0.315	0	CD4T_c05-CCR7	CD55
0	1.298	0.896	0.221	0	CD4T_c05-CCR7	CREM
0	1.24679	0.843	0.314	0	CD4T_c05-CCR7	YPEL5
0	1.21199	0.754	0.232	0	CD4T_c05-CCR7	FAM177A1
0	1.20142	0.815	0.351	0	CD4T_c05-CCR7	SLC2A3
0	1.19612	0.995	0.973	0	CD4T_c05-CCR7	FTH1
0	1.13141	0.936	0.642	0	CD4T_c05-CCR7	JUNB
0	1.11701	0.7	0.317	0	CD4T_c05-CCR7	GPR183
0	1.11327	0.919	0.477	0	CD4T_c05-CCR7	CXCR4
0	1.09377	0.984	0.594	0	CD4T_c05-CCR7	SRGN
0	1.0915	0.847	0.447	0	CD4T_c05-CCR7	EZR
0	1.02194	0.609	0.17	0	CD4T_c05-CCR7	ZNF331
0	0.998907	0.825	0.367	0	CD4T_c05-CCR7	SELENOK
0	0.949184	0.356	0.055	0	CD4T_c05-CCR7	AREG
0	0.923191	0.525	0.106	0	CD4T_c05-CCR7	SC5D
0	0.921239	0.653	0.299	0	CD4T_c05-CCR7	DCXR
0	0.883733	0.57	0.162	0	CD4T_c05-CCR7	VPS37B
0	0.808402	0.422	0.114	0	CD4T_c05-CCR7	CHMP1B
0	0.761705	0.633	0.293	0	CD4T_c05-CCR7	SDCBP
0	0.738735	0.519	0.17	0	CD4T_c05-CCR7	SYAP1
0	0.712862	0.519	0.178	0	CD4T_c05-CCR7	USP36
0	0.67746	0.961	0.865	0	CD4T_c05-CCR7	ZFP36L2
0	0.646724	0.728	0.333	0	CD4T_c05-CCR7	TNFAIP3
0	0.625589	0.667	0.265	0	CD4T_c05-CCR7	DUSP2
0	0.607508	0.339	0.079	0	CD4T_c05-CCR7	GABARAPL1
0	0.605387	0.993	0.967	0	CD4T_c05-CCR7	SARAF
0	0.57768	0.369	0.097	0	CD4T_c05-CCR7	FOSL2
0	0.489215	0.214	0.024	0	CD4T_c05-CCR7	LYPD3
0	0.482631	0.997	0.981	0	CD4T_c05-CCR7	EIF1
2.78e-298	0.749313	0.456	0.162	4.09e-294	CD4T_c05-CCR7	PTP4A1
7.75e-286	0.856016	0.697	0.381	1.14e-281	CD4T_c05-CCR7	RGCC
3.32e-282	0.549199	0.251	0.055	4.88e-278	CD4T_c05-CCR7	NR4A3
2.01e-274	0.651091	0.416	0.14	2.96e-270	CD4T_c05-CCR7	GPCPD1
1.03e-273	0.691556	0.759	0.446	1.52e-269	CD4T_c05-CCR7	SFPQ
6.46e-273	0.535215	0.316	0.086	9.49e-269	CD4T_c05-CCR7	KPNA2
1.82e-271	0.701664	0.464	0.173	2.68e-267	CD4T_c05-CCR7	ATP1B3
7.33e-268	0.668807	0.412	0.142	1.08e-263	CD4T_c05-CCR7	ALG13
7.64e-266	0.529339	0.216	0.045	1.12e-261	CD4T_c05-CCR7	GPR18
9.66e-262	0.822243	0.763	0.467	1.42e-257	CD4T_c05-CCR7	ZFP36
1.33e-260	0.535114	0.312	0.086	1.96e-256	CD4T_c05-CCR7	SKIL
5.98e-260	0.447483	0.984	0.959	8.79e-256	CD4T_c05-CCR7	PABPC1
1.36e-252	0.478525	0.248	0.059	2e-248	CD4T_c05-CCR7	ELL2
4.25e-252	0.676936	0.435	0.159	6.25e-248	CD4T_c05-CCR7	HSPH1
2.46e-251	0.838557	0.769	0.508	3.62e-247	CD4T_c05-CCR7	CCR7
5.79e-251	0.619096	0.509	0.209	8.5e-247	CD4T_c05-CCR7	PPP1CB
1.84e-249	0.466743	0.959	0.876	2.7e-245	CD4T_c05-CCR7	UBC
2.61e-249	0.646355	0.419	0.15	3.83e-245	CD4T_c05-CCR7	SOCS1
8.57e-247	0.576314	0.877	0.691	1.26e-242	CD4T_c05-CCR7	LEPROTL1
9.91e-243	0.612226	0.425	0.16	1.46e-238	CD4T_c05-CCR7	WDR74
5.72e-240	0.644433	0.561	0.256	8.4e-236	CD4T_c05-CCR7	NFE2L2
7.54e-238	0.326277	0.999	0.988	1.11e-233	CD4T_c05-CCR7	PTMA
6.32e-234	0.659889	0.647	0.336	9.28e-230	CD4T_c05-CCR7	BTG2
7.16e-231	0.619543	0.508	0.215	1.05e-226	CD4T_c05-CCR7	TUBB4B
1.49e-229	0.420561	0.213	0.049	2.19e-225	CD4T_c05-CCR7	PHLDB3
7.8e-229	0.647539	0.521	0.238	1.15e-224	CD4T_c05-CCR7	NSMCE3
1.45e-227	0.537223	0.388	0.136	2.13e-223	CD4T_c05-CCR7	BCL3
2.92e-225	0.568266	0.341	0.112	4.3e-221	CD4T_c05-CCR7	CSRNP1
9.05e-225	0.410355	0.205	0.046	1.33e-220	CD4T_c05-CCR7	DHCR7
4.52e-224	0.436416	0.979	0.938	6.64e-220	CD4T_c05-CCR7	H3F3B
1.87e-217	0.581364	0.418	0.162	2.74e-213	CD4T_c05-CCR7	EIF4A3
5.34e-215	0.430684	0.222	0.055	7.85e-211	CD4T_c05-CCR7	GADD45A
3.28e-214	0.557637	0.4	0.152	4.83e-210	CD4T_c05-CCR7	P2RY10
1.22e-212	0.590242	0.513	0.234	1.8e-208	CD4T_c05-CCR7	BCAS2
8.08e-210	0.569996	0.633	0.333	1.19e-205	CD4T_c05-CCR7	DNAJA1
9.24e-209	0.597652	0.416	0.163	1.36e-204	CD4T_c05-CCR7	PTGER4
1.31e-206	0.58988	0.536	0.252	1.92e-202	CD4T_c05-CCR7	RNF125
1.14e-205	0.59944	0.563	0.281	1.67e-201	CD4T_c05-CCR7	GSPT1
4.04e-198	0.575233	0.398	0.156	5.94e-194	CD4T_c05-CCR7	IDI1
3.22e-196	0.52832	0.726	0.465	4.74e-192	CD4T_c05-CCR7	UBE2B
1.5e-195	0.497198	0.326	0.111	2.21e-191	CD4T_c05-CCR7	UBE2S
4.92e-195	0.437063	0.278	0.085	7.23e-191	CD4T_c05-CCR7	PER1
3.44e-194	0.717122	0.631	0.364	5.05e-190	CD4T_c05-CCR7	NR3C1
8.19e-193	0.571486	0.473	0.213	1.2e-188	CD4T_c05-CCR7	ARID5A
4.96e-188	0.654938	0.869	0.803	7.28e-184	CD4T_c05-CCR7	KLF2
5.76e-187	0.658006	0.572	0.304	8.46e-183	CD4T_c05-CCR7	CYCS
1.3e-186	0.510311	0.544	0.261	1.92e-182	CD4T_c05-CCR7	SAMSN1
5.11e-184	0.759276	0.594	0.329	7.5e-180	CD4T_c05-CCR7	DDIT4
3.16e-183	0.502522	0.312	0.106	4.64e-179	CD4T_c05-CCR7	TIPARP
7.35e-178	0.519558	0.487	0.223	1.08e-173	CD4T_c05-CCR7	PDE4B
2.87e-174	0.531492	0.411	0.176	4.22e-170	CD4T_c05-CCR7	CRYBG1
1.79e-172	0.295579	0.144	0.03	2.63e-168	CD4T_c05-CCR7	FASN
1.96e-169	0.492254	0.743	0.493	2.88e-165	CD4T_c05-CCR7	DNAJB1
6.28e-169	0.568923	0.684	0.435	9.23e-165	CD4T_c05-CCR7	PDCD4
4.27e-164	0.448699	0.311	0.109	6.27e-160	CD4T_c05-CCR7	RGS1
1.77e-161	0.419604	0.226	0.068	2.6e-157	CD4T_c05-CCR7	SLC16A3
4.1e-161	0.550903	0.717	0.493	6.03e-157	CD4T_c05-CCR7	RHOH
6.58e-160	0.473718	0.374	0.156	9.67e-156	CD4T_c05-CCR7	RELB
2.44e-157	0.6002	0.376	0.154	3.59e-153	CD4T_c05-CCR7	FOS
3.69e-157	0.39977	0.31	0.112	5.42e-153	CD4T_c05-CCR7	DUSP5
2.13e-155	0.490188	0.623	0.373	3.13e-151	CD4T_c05-CCR7	EMD
1.8e-154	0.431397	0.262	0.087	2.65e-150	CD4T_c05-CCR7	CDKN1A
3.41e-154	0.514797	0.471	0.236	5.02e-150	CD4T_c05-CCR7	RBM38
7.1e-152	0.413579	0.3	0.112	1.04e-147	CD4T_c05-CCR7	PNPLA8
2.75e-150	0.402804	0.248	0.083	4.05e-146	CD4T_c05-CCR7	IL21R
1.78e-149	0.504847	0.71	0.476	2.62e-145	CD4T_c05-CCR7	HSPE1
3.46e-148	0.373947	0.137	0.031	5.08e-144	CD4T_c05-CCR7	NR4A1
5.62e-148	0.441931	0.331	0.133	8.25e-144	CD4T_c05-CCR7	SOCS3
4.27e-147	0.542993	0.718	0.515	6.28e-143	CD4T_c05-CCR7	HIST1H4C
4.89e-147	0.436462	0.535	0.287	7.19e-143	CD4T_c05-CCR7	DNAJB6
1.53e-143	0.390629	0.284	0.104	2.24e-139	CD4T_c05-CCR7	NAMPT
3.53e-141	0.447887	0.483	0.246	5.19e-137	CD4T_c05-CCR7	GTF2B
1.23e-139	0.361309	0.218	0.07	1.81e-135	CD4T_c05-CCR7	JMY
1.12e-138	0.403593	0.207	0.065	1.64e-134	CD4T_c05-CCR7	PDP1
1.75e-138	0.457174	0.618	0.368	2.57e-134	CD4T_c05-CCR7	HSPA5
3.1e-138	0.408163	0.418	0.195	4.55e-134	CD4T_c05-CCR7	ICOS
3.48e-138	0.41745	0.988	0.968	5.11e-134	CD4T_c05-CCR7	BTG1
2.06e-137	0.535695	0.52	0.297	3.03e-133	CD4T_c05-CCR7	DDX21
3.15e-137	0.489282	0.671	0.451	4.62e-133	CD4T_c05-CCR7	SRSF2
2.5e-136	0.495574	0.518	0.281	3.68e-132	CD4T_c05-CCR7	BIRC3
5.85e-136	0.301818	0.975	0.96	8.6e-132	CD4T_c05-CCR7	ARHGDIB
1.82e-135	0.475504	0.402	0.19	2.67e-131	CD4T_c05-CCR7	ISCA1
1.65e-133	0.438844	0.353	0.155	2.43e-129	CD4T_c05-CCR7	AP3M2
1.61e-132	0.35697	0.247	0.088	2.37e-128	CD4T_c05-CCR7	DCTN6
5.62e-132	0.427022	0.468	0.237	8.26e-128	CD4T_c05-CCR7	REL
1.6e-131	0.477323	0.463	0.238	2.36e-127	CD4T_c05-CCR7	TPM4
5.13e-131	0.263775	0.129	0.03	7.54e-127	CD4T_c05-CCR7	PGAP1
7.91e-128	0.428169	0.724	0.519	1.16e-123	CD4T_c05-CCR7	DDX24
4.13e-127	0.357059	0.252	0.091	6.07e-123	CD4T_c05-CCR7	KDM6B
5.18e-125	0.30624	0.151	0.041	7.61e-121	CD4T_c05-CCR7	TUBB2A
2.83e-124	0.524362	0.601	0.384	4.16e-120	CD4T_c05-CCR7	HSPD1
7.78e-123	0.442087	0.65	0.422	1.14e-118	CD4T_c05-CCR7	ELF1
1.16e-122	0.476672	0.38	0.182	1.7e-118	CD4T_c05-CCR7	SESN3
2.46e-121	0.411309	0.824	0.687	3.61e-117	CD4T_c05-CCR7	CALM2
1.92e-119	0.444621	0.566	0.342	2.83e-115	CD4T_c05-CCR7	BRD2
8.65e-119	0.429999	0.373	0.176	1.27e-114	CD4T_c05-CCR7	JUND
1e-118	0.412247	0.561	0.321	1.48e-114	CD4T_c05-CCR7	DUSP1
2.44e-117	0.423583	0.726	0.533	3.59e-113	CD4T_c05-CCR7	SRSF7
8.02e-117	0.42111	0.415	0.208	1.18e-112	CD4T_c05-CCR7	CNOT6L
2.06e-114	0.45648	0.635	0.423	3.03e-110	CD4T_c05-CCR7	SMAP2
3.06e-113	0.335176	0.303	0.128	4.5e-109	CD4T_c05-CCR7	PDE4D
3.41e-113	0.396441	0.291	0.125	5.01e-109	CD4T_c05-CCR7	MTHFD2
2.11e-112	0.289566	0.187	0.061	3.09e-108	CD4T_c05-CCR7	ANKRD37
5.96e-112	0.341065	0.87	0.739	8.76e-108	CD4T_c05-CCR7	HSP90AA1
2.47e-111	0.36464	0.213	0.077	3.63e-107	CD4T_c05-CCR7	NANS
3.91e-111	0.395486	0.309	0.137	5.75e-107	CD4T_c05-CCR7	EVI2A
9.87e-111	0.371904	0.893	0.786	1.45e-106	CD4T_c05-CCR7	YWHAZ
4.31e-108	0.399393	0.458	0.25	6.34e-104	CD4T_c05-CCR7	ARF4
9.19e-108	0.386335	0.275	0.116	1.35e-103	CD4T_c05-CCR7	TGIF1
1.93e-107	0.541641	0.519	0.314	2.84e-103	CD4T_c05-CCR7	MT2A
5.73e-107	0.301413	0.198	0.07	8.43e-103	CD4T_c05-CCR7	GPR132
8.8e-107	0.412633	0.604	0.398	1.29e-102	CD4T_c05-CCR7	RBM8A
1.77e-106	0.40426	0.322	0.148	2.61e-102	CD4T_c05-CCR7	PLK3
2.75e-106	0.434356	0.537	0.323	4.04e-102	CD4T_c05-CCR7	G3BP2
7.56e-105	0.401343	0.732	0.555	1.11e-100	CD4T_c05-CCR7	LDHA
1.4e-103	0.286487	0.966	0.918	2.05e-99	CD4T_c05-CCR7	CALM1
3.82e-103	0.352862	0.19	0.068	5.62e-99	CD4T_c05-CCR7	H2AFX
4.93e-103	0.461227	0.534	0.33	7.24e-99	CD4T_c05-CCR7	DYNLL1
1.93e-102	0.402624	0.316	0.149	2.83e-98	CD4T_c05-CCR7	ARRDC2
4.67e-102	0.385922	0.499	0.293	6.86e-98	CD4T_c05-CCR7	HSPA9
2.57e-100	0.257235	0.109	0.027	3.78e-96	CD4T_c05-CCR7	CXCR5
3.46e-100	0.311313	0.208	0.077	5.09e-96	CD4T_c05-CCR7	SERTAD1
5.01e-100	0.479545	0.547	0.35	7.37e-96	CD4T_c05-CCR7	TUBA1A
3.76e-98	0.306389	0.193	0.07	5.52e-94	CD4T_c05-CCR7	CKS2
5.92e-96	0.38164	0.458	0.262	8.71e-92	CD4T_c05-CCR7	MAPK1IP1L
2.21e-95	0.356976	0.218	0.087	3.25e-91	CD4T_c05-CCR7	FAAH2
2.48e-95	0.415341	0.424	0.23	3.64e-91	CD4T_c05-CCR7	CHD1
5.3e-95	0.332295	0.292	0.133	7.78e-91	CD4T_c05-CCR7	NFKB2
5.78e-95	0.30332	0.237	0.097	8.49e-91	CD4T_c05-CCR7	SEC23B
1.01e-94	0.316137	0.234	0.096	1.48e-90	CD4T_c05-CCR7	RRM1
3.2e-93	0.342639	0.956	0.916	4.71e-89	CD4T_c05-CCR7	HSPA8
1.06e-91	0.398255	0.62	0.434	1.56e-87	CD4T_c05-CCR7	CDKN1B
3.93e-91	0.316261	0.224	0.091	5.78e-87	CD4T_c05-CCR7	MRPL1
3.5e-90	0.297776	0.163	0.056	5.15e-86	CD4T_c05-CCR7	ETV3
6.36e-90	0.323747	0.286	0.133	9.34e-86	CD4T_c05-CCR7	OSER1
2.21e-89	0.324135	0.403	0.216	3.25e-85	CD4T_c05-CCR7	SH2D2A
2.85e-89	0.482796	0.378	0.212	4.18e-85	CD4T_c05-CCR7	RILPL2
5.63e-89	0.357606	0.426	0.239	8.27e-85	CD4T_c05-CCR7	TNFRSF1B
6.64e-88	0.260967	0.168	0.06	9.76e-84	CD4T_c05-CCR7	UAP1
1.13e-87	0.417335	0.411	0.232	1.66e-83	CD4T_c05-CCR7	SOD2
1.25e-87	0.285996	0.222	0.091	1.83e-83	CD4T_c05-CCR7	JOSD1
1.34e-87	0.387363	0.362	0.193	1.97e-83	CD4T_c05-CCR7	RNF138
1.27e-86	0.437971	0.54	0.359	1.87e-82	CD4T_c05-CCR7	STAT3
2.1e-86	0.436601	0.174	0.063	3.08e-82	CD4T_c05-CCR7	FOSB
1.97e-85	0.309377	0.274	0.126	2.89e-81	CD4T_c05-CCR7	ETF1
1.99e-85	0.290054	0.184	0.07	2.93e-81	CD4T_c05-CCR7	DDIT3
2.57e-85	0.309389	0.812	0.69	3.78e-81	CD4T_c05-CCR7	UBB
3.88e-85	0.320799	0.241	0.106	5.71e-81	CD4T_c05-CCR7	OAT
1.53e-84	0.33316	0.752	0.585	2.26e-80	CD4T_c05-CCR7	SPOCK2
1.4e-83	0.425011	0.554	0.384	2.06e-79	CD4T_c05-CCR7	PIK3R1
2.12e-83	0.316742	0.33	0.167	3.12e-79	CD4T_c05-CCR7	CSNK1D
2.71e-83	0.366907	0.287	0.137	3.98e-79	CD4T_c05-CCR7	TSPYL2
6.45e-83	0.35357	0.388	0.212	9.49e-79	CD4T_c05-CCR7	CEMIP2
8.61e-83	0.336264	0.269	0.127	1.27e-78	CD4T_c05-CCR7	PAF1
8.71e-82	0.356143	0.301	0.15	1.28e-77	CD4T_c05-CCR7	RNF139
9.05e-82	0.404483	0.591	0.427	1.33e-77	CD4T_c05-CCR7	SRSF3
1.31e-80	0.327887	0.252	0.115	1.92e-76	CD4T_c05-CCR7	FBXO34
1.46e-80	0.478433	0.358	0.197	2.15e-76	CD4T_c05-CCR7	MYADM
4.96e-79	0.273083	0.168	0.063	7.29e-75	CD4T_c05-CCR7	CDC34
6.12e-79	0.417802	0.751	0.622	8.99e-75	CD4T_c05-CCR7	CD7
9.28e-79	0.365715	0.31	0.16	1.36e-74	CD4T_c05-CCR7	DDX27
2.24e-78	0.342051	0.229	0.102	3.29e-74	CD4T_c05-CCR7	NFATC1
1.04e-77	0.278828	0.167	0.063	1.53e-73	CD4T_c05-CCR7	ZNF10
2.03e-77	0.437653	0.378	0.217	2.98e-73	CD4T_c05-CCR7	MT1X
1.42e-76	0.364693	0.654	0.497	2.08e-72	CD4T_c05-CCR7	SNU13
9.62e-76	0.271246	0.37	0.199	1.41e-71	CD4T_c05-CCR7	SYTL3
1e-75	0.268607	0.211	0.09	1.47e-71	CD4T_c05-CCR7	PRMT9
2.79e-73	0.426605	0.504	0.338	4.1e-69	CD4T_c05-CCR7	ABLIM1
4e-73	0.370117	0.5	0.325	5.88e-69	CD4T_c05-CCR7	KLF3
7.26e-73	0.302827	0.603	0.422	1.07e-68	CD4T_c05-CCR7	SNRPG
1.29e-72	0.426417	0.454	0.294	1.9e-68	CD4T_c05-CCR7	SATB1
1.31e-72	0.335888	0.367	0.208	1.92e-68	CD4T_c05-CCR7	AMD1
4.42e-72	0.363564	0.532	0.357	6.49e-68	CD4T_c05-CCR7	RNF149
4.13e-71	0.283786	0.193	0.081	6.06e-67	CD4T_c05-CCR7	PFKFB3
8.13e-70	0.325014	0.497	0.329	1.2e-65	CD4T_c05-CCR7	STRAP
1.3e-69	0.298154	0.18	0.075	1.91e-65	CD4T_c05-CCR7	HOOK2
1.37e-69	0.320893	0.251	0.121	2.02e-65	CD4T_c05-CCR7	IFRD1
1.38e-69	0.330469	0.4	0.238	2.03e-65	CD4T_c05-CCR7	SERINC3
2.2e-69	0.30019	0.786	0.671	3.23e-65	CD4T_c05-CCR7	NCL
1.07e-68	0.414506	0.374	0.225	1.57e-64	CD4T_c05-CCR7	TNIK
1.62e-68	0.329027	0.641	0.479	2.38e-64	CD4T_c05-CCR7	ATP6V0C
4.55e-67	0.331206	0.362	0.21	6.68e-63	CD4T_c05-CCR7	CEBPZ
4.88e-67	0.319033	0.739	0.601	7.17e-63	CD4T_c05-CCR7	FUS
5.5e-66	0.330158	0.313	0.171	8.09e-62	CD4T_c05-CCR7	PIM3
1.38e-65	0.348401	0.314	0.17	2.03e-61	CD4T_c05-CCR7	PPP1R15A
1.52e-65	0.292673	0.461	0.289	2.23e-61	CD4T_c05-CCR7	CD28
3.5e-64	0.302039	0.176	0.074	5.14e-60	CD4T_c05-CCR7	RGS2
5.68e-64	0.29676	0.243	0.121	8.35e-60	CD4T_c05-CCR7	PLEKHB2
8.2e-64	0.271066	0.212	0.098	1.2e-59	CD4T_c05-CCR7	SLC39A8
8.46e-64	0.335794	0.555	0.39	1.24e-59	CD4T_c05-CCR7	FYN
2.23e-63	0.281731	0.906	0.866	3.28e-59	CD4T_c05-CCR7	PNRC1
5.08e-63	0.289774	0.846	0.785	7.47e-59	CD4T_c05-CCR7	YWHAB
7.1e-63	0.374857	0.511	0.361	1.04e-58	CD4T_c05-CCR7	ICAM2
1.19e-61	0.318639	0.263	0.137	1.76e-57	CD4T_c05-CCR7	PPP1R10
1.23e-61	0.30992	0.722	0.605	1.81e-57	CD4T_c05-CCR7	NDUFS5
1.25e-60	0.324515	0.218	0.106	1.83e-56	CD4T_c05-CCR7	ARL4A
1.37e-60	0.317186	0.344	0.201	2.02e-56	CD4T_c05-CCR7	NFKB1
1.43e-60	0.329619	0.361	0.216	2.1e-56	CD4T_c05-CCR7	MAT2A
3.21e-60	0.511228	0.665	0.555	4.72e-56	CD4T_c05-CCR7	ANXA1
6.69e-60	0.267775	0.235	0.117	9.84e-56	CD4T_c05-CCR7	STX5
7.32e-60	0.335339	0.628	0.47	1.08e-55	CD4T_c05-CCR7	EIF4G2
8.03e-60	0.294357	0.326	0.185	1.18e-55	CD4T_c05-CCR7	SNX9
1.14e-59	0.341471	0.331	0.191	1.67e-55	CD4T_c05-CCR7	IVNS1ABP
4.27e-59	0.270463	0.774	0.672	6.27e-55	CD4T_c05-CCR7	SLC25A3
3.59e-57	0.298392	0.321	0.185	5.27e-53	CD4T_c05-CCR7	HBP1
1.48e-56	0.306409	0.348	0.207	2.18e-52	CD4T_c05-CCR7	SMARCA5
7.14e-56	0.368088	0.652	0.523	1.05e-51	CD4T_c05-CCR7	H2AFZ
7.24e-56	0.391352	0.57	0.438	1.06e-51	CD4T_c05-CCR7	NFKBIA
1.01e-54	0.316212	0.39	0.247	1.48e-50	CD4T_c05-CCR7	SLC3A2
1.12e-54	0.269933	0.331	0.195	1.65e-50	CD4T_c05-CCR7	NR1H2
2.24e-54	0.274737	0.258	0.139	3.29e-50	CD4T_c05-CCR7	IRF2BP2
2.88e-54	0.386955	0.582	0.438	4.24e-50	CD4T_c05-CCR7	MCL1
3.18e-54	0.266325	0.968	0.965	4.67e-50	CD4T_c05-CCR7	RPL41
6.92e-54	0.280881	0.266	0.144	1.02e-49	CD4T_c05-CCR7	ZBTB1
2.72e-53	0.324355	0.135	0.055	4e-49	CD4T_c05-CCR7	MT1E
1.97e-52	0.295089	0.274	0.151	2.9e-48	CD4T_c05-CCR7	BACH2
3.14e-52	0.294313	0.377	0.238	4.61e-48	CD4T_c05-CCR7	EIF4A1
4.2e-52	0.363552	0.474	0.336	6.18e-48	CD4T_c05-CCR7	S1PR1
7.22e-52	0.33261	0.31	0.184	1.06e-47	CD4T_c05-CCR7	PDCL3
9.69e-52	0.294019	0.296	0.171	1.42e-47	CD4T_c05-CCR7	SNHG15
1.01e-51	0.46057	0.561	0.421	1.48e-47	CD4T_c05-CCR7	CD69
1.92e-51	0.325452	0.426	0.283	2.82e-47	CD4T_c05-CCR7	BAZ1A
1.21e-50	0.338726	0.672	0.559	1.77e-46	CD4T_c05-CCR7	ANKRD12
3.62e-48	0.280333	0.568	0.43	5.32e-44	CD4T_c05-CCR7	EIF5
8.08e-48	0.278244	0.687	0.564	1.19e-43	CD4T_c05-CCR7	SAP18
1.66e-47	0.262468	0.696	0.58	2.43e-43	CD4T_c05-CCR7	PGK1
1.74e-47	0.304571	0.662	0.538	2.55e-43	CD4T_c05-CCR7	CALR
4.35e-47	0.283936	0.308	0.184	6.39e-43	CD4T_c05-CCR7	CDK17
1.27e-46	0.273957	0.145	0.065	1.87e-42	CD4T_c05-CCR7	CMSS1
1.82e-46	0.266209	0.391	0.253	2.67e-42	CD4T_c05-CCR7	SBDS
2.46e-46	0.375574	0.348	0.222	3.62e-42	CD4T_c05-CCR7	GADD45B
1.69e-45	0.255675	0.37	0.239	2.48e-41	CD4T_c05-CCR7	VDAC1
2.13e-45	0.269949	0.33	0.205	3.14e-41	CD4T_c05-CCR7	DNTTIP2
2.99e-45	0.270317	0.299	0.18	4.4e-41	CD4T_c05-CCR7	HNRNPAB
7.05e-45	0.389388	0.532	0.417	1.04e-40	CD4T_c05-CCR7	TUBA4A
7.14e-45	0.328254	0.584	0.461	1.05e-40	CD4T_c05-CCR7	ITM2A
2.27e-44	0.283141	0.671	0.565	3.34e-40	CD4T_c05-CCR7	RNASET2
2.38e-44	0.329826	0.392	0.261	3.5e-40	CD4T_c05-CCR7	GLIPR1
2.78e-44	0.264411	0.341	0.214	4.09e-40	CD4T_c05-CCR7	TOP1
4.47e-44	0.269943	0.352	0.225	6.56e-40	CD4T_c05-CCR7	SLBP
6.28e-44	0.27543	0.416	0.279	9.23e-40	CD4T_c05-CCR7	DDX3X
2.87e-43	0.253196	0.477	0.339	4.22e-39	CD4T_c05-CCR7	BZW1
3.15e-43	0.256929	0.266	0.154	4.62e-39	CD4T_c05-CCR7	RALGAPA1
1.07e-42	0.281976	0.668	0.561	1.58e-38	CD4T_c05-CCR7	CYTIP
6.23e-42	0.257584	0.232	0.131	9.16e-38	CD4T_c05-CCR7	INSIG1
9.44e-42	0.288185	0.535	0.412	1.39e-37	CD4T_c05-CCR7	ARL4C
1.39e-40	0.263795	0.236	0.136	2.05e-36	CD4T_c05-CCR7	CCDC57
3.69e-40	0.269661	0.451	0.324	5.43e-36	CD4T_c05-CCR7	NOP58
3.78e-40	0.255878	0.379	0.253	5.55e-36	CD4T_c05-CCR7	DYNLT1
1.65e-39	0.255974	0.464	0.339	2.42e-35	CD4T_c05-CCR7	WTAP
3.45e-38	0.258091	0.236	0.138	5.07e-34	CD4T_c05-CCR7	MX2
1.36e-37	0.271056	0.423	0.304	1.99e-33	CD4T_c05-CCR7	SF3A1
4.31e-37	0.269023	0.484	0.36	6.34e-33	CD4T_c05-CCR7	VAPA
1.38e-36	0.25043	0.438	0.313	2.03e-32	CD4T_c05-CCR7	WSB1
3.9e-35	0.277312	0.586	0.471	5.73e-31	CD4T_c05-CCR7	TUBA1B
4.23e-35	0.278039	0.338	0.226	6.22e-31	CD4T_c05-CCR7	ODC1
1.9e-34	0.264014	0.288	0.184	2.8e-30	CD4T_c05-CCR7	ZFAND5
2.88e-34	0.272854	0.501	0.394	4.23e-30	CD4T_c05-CCR7	MBP
1.94e-31	0.25599	0.347	0.239	2.86e-27	CD4T_c05-CCR7	RANBP2
6.82e-31	0.257858	0.528	0.425	1e-26	CD4T_c05-CCR7	NDUFV2
8.57e-30	0.3012	0.569	0.482	1.26e-25	CD4T_c05-CCR7	PRDX2
7.32e-29	0.296114	0.513	0.409	1.08e-24	CD4T_c05-CCR7	SAT1
4.55e-28	0.250171	0.514	0.406	6.69e-24	CD4T_c05-CCR7	IRF1
7.55e-28	0.29478	0.635	0.571	1.11e-23	CD4T_c05-CCR7	LITAF
5.03e-19	0.318714	0.345	0.271	7.4e-15	CD4T_c05-CCR7	CITED2
0.00425512	0.286629	0.785	0.787	1	CD4T_c05-CCR7	RPS10
0	1.0721	0.536	0.048	0	CD4T_c06-IFI44L	IFI44L
0	0.914181	0.473	0.054	0	CD4T_c06-IFI44L	OAS1
0	0.794243	0.387	0.012	0	CD4T_c06-IFI44L	IFIT3
0	0.60512	0.306	0.013	0	CD4T_c06-IFI44L	IFIT1
0	0.578041	0.283	0.013	0	CD4T_c06-IFI44L	RSAD2
2.12e-288	1.25759	0.726	0.142	3.12e-284	CD4T_c06-IFI44L	MX1
1.13e-189	0.89931	0.585	0.124	1.66e-185	CD4T_c06-IFI44L	XAF1
2.45e-164	1.33664	0.666	0.189	3.6e-160	CD4T_c06-IFI44L	IFI6
1.21e-133	0.407148	0.195	0.021	1.78e-129	CD4T_c06-IFI44L	CMPK2
7.26e-121	0.742951	0.469	0.114	1.07e-116	CD4T_c06-IFI44L	IRF7
2.24e-112	0.388422	0.172	0.019	3.29e-108	CD4T_c06-IFI44L	USP18
2.1e-97	0.991353	0.619	0.231	3.08e-93	CD4T_c06-IFI44L	ISG15
2.06e-94	0.626255	0.998	0.962	3.02e-90	CD4T_c06-IFI44L	IFITM1
1.18e-93	0.66021	0.476	0.139	1.73e-89	CD4T_c06-IFI44L	MX2
5.63e-93	0.868218	0.905	0.589	8.27e-89	CD4T_c06-IFI44L	LY6E
4.53e-88	0.627896	0.452	0.13	6.65e-84	CD4T_c06-IFI44L	EIF2AK2
1.94e-87	0.48897	0.209	0.034	2.85e-83	CD4T_c06-IFI44L	OAS3
3.12e-85	0.348223	0.16	0.021	4.58e-81	CD4T_c06-IFI44L	IFIT2
6e-84	0.532499	0.297	0.065	8.81e-80	CD4T_c06-IFI44L	HERC5
7.15e-65	0.644369	0.719	0.349	1.05e-60	CD4T_c06-IFI44L	STAT1
5.97e-61	0.389051	0.234	0.053	8.77e-57	CD4T_c06-IFI44L	DDX60
2.28e-59	0.35201	0.23	0.052	3.35e-55	CD4T_c06-IFI44L	IFI44
2.71e-58	0.556595	0.422	0.148	3.98e-54	CD4T_c06-IFI44L	EPSTI1
4.88e-54	0.408211	0.329	0.101	7.17e-50	CD4T_c06-IFI44L	PARP9
2.23e-52	0.434734	0.311	0.095	3.28e-48	CD4T_c06-IFI44L	OAS2
1.76e-47	0.531011	0.425	0.163	2.58e-43	CD4T_c06-IFI44L	GBP1
3.48e-47	0.368018	0.29	0.089	5.12e-43	CD4T_c06-IFI44L	LGALS9
3.58e-43	0.423165	0.218	0.06	5.26e-39	CD4T_c06-IFI44L	PLSCR1
2.64e-41	0.251057	0.151	0.033	3.88e-37	CD4T_c06-IFI44L	AC116407.2
3.53e-40	0.374273	0.244	0.074	5.18e-36	CD4T_c06-IFI44L	DDX60L
6.66e-40	0.395722	0.329	0.12	9.79e-36	CD4T_c06-IFI44L	IFI35
3.71e-37	0.432916	0.652	0.364	5.45e-33	CD4T_c06-IFI44L	SP100
1.33e-36	0.448206	0.536	0.269	1.95e-32	CD4T_c06-IFI44L	SP110
3.8e-35	0.58247	0.276	0.099	5.59e-31	CD4T_c06-IFI44L	IFITM3
1.7e-34	0.325797	0.234	0.076	2.5e-30	CD4T_c06-IFI44L	SAMD9L
4.83e-31	0.46783	0.531	0.286	7.1e-27	CD4T_c06-IFI44L	BST2
1.97e-29	0.476829	0.557	0.321	2.89e-25	CD4T_c06-IFI44L	TRIM22
8.52e-29	0.408093	0.557	0.316	1.25e-24	CD4T_c06-IFI44L	UBE2L6
1.33e-28	0.385309	0.316	0.133	1.96e-24	CD4T_c06-IFI44L	SAMD9
1.11e-26	0.282683	0.22	0.08	1.63e-22	CD4T_c06-IFI44L	PARP10
1.41e-26	0.28674	0.176	0.057	2.07e-22	CD4T_c06-IFI44L	BISPR
3.18e-24	0.345835	0.838	0.611	4.67e-20	CD4T_c06-IFI44L	SELL
3.29e-23	0.348304	0.459	0.248	4.84e-19	CD4T_c06-IFI44L	IFI16
9.01e-22	0.360439	0.399	0.212	1.32e-17	CD4T_c06-IFI44L	C19orf66
1.57e-21	0.295793	0.552	0.32	2.31e-17	CD4T_c06-IFI44L	MT2A
3.87e-21	0.281035	0.381	0.194	5.69e-17	CD4T_c06-IFI44L	PPM1K
1.82e-20	0.297021	0.791	0.562	2.68e-16	CD4T_c06-IFI44L	TCF7
2.15e-20	0.334861	0.524	0.319	3.16e-16	CD4T_c06-IFI44L	ADAR
6.12e-19	0.302226	0.589	0.382	8.99e-15	CD4T_c06-IFI44L	SHISA5
1.01e-18	0.278761	0.295	0.144	1.48e-14	CD4T_c06-IFI44L	CHMP5
2.37e-16	0.419291	0.689	0.528	3.48e-12	CD4T_c06-IFI44L	ISG20
4.14e-16	0.274045	0.237	0.113	6.08e-12	CD4T_c06-IFI44L	LAP3
9.26e-14	0.267333	0.624	0.441	1.36e-09	CD4T_c06-IFI44L	DRAP1
6.12e-13	0.261293	0.752	0.581	8.99e-09	CD4T_c06-IFI44L	GIMAP4
1.73e-12	0.277239	0.299	0.167	2.54e-08	CD4T_c06-IFI44L	TNFSF10
7.13e-12	0.26661	0.357	0.222	1.05e-07	CD4T_c06-IFI44L	PHF11
0	2.13213	0.732	0.094	0	CD4T_c07-TIMP1	LMNA
0	1.77242	0.942	0.533	0	CD4T_c07-TIMP1	ANXA1
0	1.7624	0.623	0.132	0	CD4T_c07-TIMP1	FOS
0	1.59242	0.904	0.449	0	CD4T_c07-TIMP1	ZFP36
0	1.58906	0.81	0.365	0	CD4T_c07-TIMP1	RGCC
0	1.51563	0.997	0.972	0	CD4T_c07-TIMP1	FTH1
0	1.398	0.638	0.173	0	CD4T_c07-TIMP1	MYADM
0	1.37509	0.954	0.462	0	CD4T_c07-TIMP1	CXCR4
0	1.37431	0.916	0.202	0	CD4T_c07-TIMP1	CREM
0	1.31013	0.866	0.313	0	CD4T_c07-TIMP1	TNFAIP3
0	1.26194	0.384	0.045	0	CD4T_c07-TIMP1	FOSB
0	1.24677	0.988	0.584	0	CD4T_c07-TIMP1	SRGN
0	1.2017	0.758	0.316	0	CD4T_c07-TIMP1	DNAJA1
0	1.20169	0.563	0.061	0	CD4T_c07-TIMP1	CDKN1A
0	1.19388	0.723	0.145	0	CD4T_c07-TIMP1	NR4A2
0	1.1731	0.95	0.737	0	CD4T_c07-TIMP1	CRIP1
0	1.14424	0.88	0.434	0	CD4T_c07-TIMP1	EZR
0	1.12788	0.723	0.305	0	CD4T_c07-TIMP1	GPR183
0	1.12632	0.671	0.196	0	CD4T_c07-TIMP1	TUBB4B
0	1.06186	0.708	0.314	0	CD4T_c07-TIMP1	DDIT4
0	1.02688	0.549	0.15	0	CD4T_c07-TIMP1	PPP1R15A
0	1.02202	0.768	0.248	0	CD4T_c07-TIMP1	DUSP2
0	1.00683	0.76	0.305	0	CD4T_c07-TIMP1	YPEL5
0	0.995419	0.824	0.354	0	CD4T_c07-TIMP1	SELENOK
0	0.984226	0.459	0.098	0	CD4T_c07-TIMP1	CCR6
0	0.940055	0.975	0.861	0	CD4T_c07-TIMP1	ZFP36L2
0	0.93053	0.705	0.305	0	CD4T_c07-TIMP1	DUSP1
0	0.921025	0.761	0.342	0	CD4T_c07-TIMP1	SLC2A3
0	0.885746	0.921	0.635	0	CD4T_c07-TIMP1	JUNB
0	0.87812	0.734	0.424	0	CD4T_c07-TIMP1	MCL1
0	0.875759	0.703	0.242	0	CD4T_c07-TIMP1	SAMSN1
0	0.858742	0.977	0.914	0	CD4T_c07-TIMP1	HSPA8
0	0.849962	0.479	0.082	0	CD4T_c07-TIMP1	FOSL2
0	0.83902	0.695	0.308	0	CD4T_c07-TIMP1	CD55
0	0.834775	0.409	0.1	0	CD4T_c07-TIMP1	UBE2S
0	0.803237	0.462	0.097	0	CD4T_c07-TIMP1	CSRNP1
0	0.803145	0.929	0.71	0	CD4T_c07-TIMP1	TAGLN2
0	0.799386	0.783	0.483	0	CD4T_c07-TIMP1	DNAJB1
0	0.79407	0.917	0.732	0	CD4T_c07-TIMP1	HSP90AA1
0	0.791149	0.727	0.354	0	CD4T_c07-TIMP1	HSPA5
0	0.784929	0.962	0.907	0	CD4T_c07-TIMP1	VIM
0	0.77998	0.981	0.872	0	CD4T_c07-TIMP1	UBC
0	0.777648	0.514	0.149	0	CD4T_c07-TIMP1	PTGER4
0	0.774536	0.612	0.34	0	CD4T_c07-TIMP1	TUBA1A
0	0.746049	0.63	0.226	0	CD4T_c07-TIMP1	FAM177A1
0	0.742998	0.41	0.094	0	CD4T_c07-TIMP1	TIPARP
0	0.717243	0.803	0.545	0	CD4T_c07-TIMP1	LDHA
0	0.714603	0.478	0.123	0	CD4T_c07-TIMP1	BCL3
0	0.710653	0.842	0.576	0	CD4T_c07-TIMP1	S100A11
0	0.701178	0.429	0.142	0	CD4T_c07-TIMP1	SOCS1
0	0.698677	0.506	0.117	0	CD4T_c07-TIMP1	TENT5C
0	0.694171	0.289	0.052	0	CD4T_c07-TIMP1	AREG
0	0.691745	0.713	0.438	0	CD4T_c07-TIMP1	TGFB1
0	0.689175	0.396	0.154	0	CD4T_c07-TIMP1	HSPH1
0	0.683631	0.367	0.109	0	CD4T_c07-TIMP1	CHMP1B
0	0.681303	0.39	0.138	0	CD4T_c07-TIMP1	TNFRSF4
0	0.678076	0.384	0.092	0	CD4T_c07-TIMP1	ARL4A
0	0.672316	0.233	0.054	0	CD4T_c07-TIMP1	NEU1
0	0.669499	0.612	0.319	0	CD4T_c07-TIMP1	DYNLL1
0	0.666987	0.927	0.75	0	CD4T_c07-TIMP1	S100A10
0	0.665004	0.469	0.168	0	CD4T_c07-TIMP1	ZNF331
0	0.66254	0.992	0.936	0	CD4T_c07-TIMP1	H3F3B
0	0.651161	0.492	0.156	0	CD4T_c07-TIMP1	VPS37B
0	0.648687	0.393	0.101	0	CD4T_c07-TIMP1	DUSP5
0	0.645133	0.881	0.682	0	CD4T_c07-TIMP1	UBB
0	0.635997	0.459	0.164	0	CD4T_c07-TIMP1	SYAP1
0	0.631252	0.261	0.03	0	CD4T_c07-TIMP1	TUBB2A
0	0.630207	0.442	0.166	0	CD4T_c07-TIMP1	JUND
0	0.630179	0.456	0.144	0	CD4T_c07-TIMP1	RELB
0	0.62625	0.277	0.045	0	CD4T_c07-TIMP1	PHLDA1
0	0.626024	0.558	0.248	0	CD4T_c07-TIMP1	NFE2L2
0	0.624668	0.627	0.331	0	CD4T_c07-TIMP1	BRD2
0	0.620203	0.384	0.148	0	CD4T_c07-TIMP1	PNP
0	0.618991	0.433	0.154	0	CD4T_c07-TIMP1	EIF4A3
0	0.610714	0.302	0.067	0	CD4T_c07-TIMP1	SERTAD1
0	0.608443	0.546	0.212	0	CD4T_c07-TIMP1	PDE4B
0	0.602713	0.394	0.117	0	CD4T_c07-TIMP1	PDE4D
0	0.596964	0.341	0.081	0	CD4T_c07-TIMP1	KDM6B
0	0.593825	0.394	0.138	0	CD4T_c07-TIMP1	PLK3
0	0.59008	0.44	0.149	0	CD4T_c07-TIMP1	DNAJB9
0	0.586351	0.501	0.204	0	CD4T_c07-TIMP1	SH2D2A
0	0.583406	0.432	0.17	0	CD4T_c07-TIMP1	GPR65
0	0.581695	0.715	0.441	0	CD4T_c07-TIMP1	SFPQ
0	0.580953	0.581	0.296	0	CD4T_c07-TIMP1	CYCS
0	0.578128	0.325	0.079	0	CD4T_c07-TIMP1	SKIL
0	0.574656	0.998	0.98	0	CD4T_c07-TIMP1	EIF1
0	0.560856	0.542	0.226	0	CD4T_c07-TIMP1	REL
0	0.558573	0.989	0.967	0	CD4T_c07-TIMP1	BTG1
0	0.558392	0.329	0.077	0	CD4T_c07-TIMP1	PER1
0	0.555309	0.312	0.086	0	CD4T_c07-TIMP1	BHLHE40
0	0.544504	0.561	0.279	0	CD4T_c07-TIMP1	DNAJB6
0	0.543105	0.227	0.023	0	CD4T_c07-TIMP1	PLAUR
0	0.53562	0.264	0.052	0	CD4T_c07-TIMP1	ANKRD37
0	0.529314	0.358	0.106	0	CD4T_c07-TIMP1	SC5D
0	0.520811	0.5	0.226	0	CD4T_c07-TIMP1	HERPUD1
0	0.508309	0.256	0.05	0	CD4T_c07-TIMP1	NR4A3
0	0.500269	0.313	0.093	0	CD4T_c07-TIMP1	RARA
0	0.492345	0.907	0.782	0	CD4T_c07-TIMP1	YWHAZ
0	0.486919	0.23	0.03	0	CD4T_c07-TIMP1	GNA15
0	0.472346	0.976	0.775	0	CD4T_c07-TIMP1	S100A4
0	0.453167	0.244	0.063	0	CD4T_c07-TIMP1	SLC16A3
0	0.448776	0.251	0.063	0	CD4T_c07-TIMP1	CKS2
0	0.445178	0.238	0.055	0	CD4T_c07-TIMP1	ELL2
0	0.427681	0.228	0.059	0	CD4T_c07-TIMP1	IER5
0	0.426691	0.162	0.026	0	CD4T_c07-TIMP1	NR4A1
0	0.423851	0.267	0.076	0	CD4T_c07-TIMP1	GABARAPL1
0	0.35904	0.191	0.038	0	CD4T_c07-TIMP1	TRAF4
0	0.349401	0.998	0.988	0	CD4T_c07-TIMP1	PTMA
0	0.338492	0.13	0.019	0	CD4T_c07-TIMP1	AC020916.1
0	0.298415	0.112	0.01	0	CD4T_c07-TIMP1	IL4I1
2.45e-307	0.664768	0.563	0.296	3.6e-303	CD4T_c07-TIMP1	ADGRE5
3.18e-300	0.570708	0.503	0.238	4.68e-296	CD4T_c07-TIMP1	GTF2B
4.42e-299	0.330683	0.181	0.041	6.49e-295	CD4T_c07-TIMP1	CYSTM1
6.3e-297	0.566605	0.914	0.776	9.26e-293	CD4T_c07-TIMP1	HSP90AB1
5.76e-289	0.570191	0.587	0.314	8.47e-285	CD4T_c07-TIMP1	G3BP2
1.25e-286	0.521175	0.487	0.228	1.84e-282	CD4T_c07-TIMP1	BCAS2
4.6e-285	0.514659	0.408	0.169	6.76e-281	CD4T_c07-TIMP1	ATP1B3
5.45e-285	0.370962	0.207	0.054	8e-281	CD4T_c07-TIMP1	PERP
6.33e-285	0.644864	0.457	0.215	9.3e-281	CD4T_c07-TIMP1	ODC1
2.72e-282	0.659036	0.677	0.428	4e-278	CD4T_c07-TIMP1	NFKBIA
7.94e-281	0.636706	0.455	0.211	1.17e-276	CD4T_c07-TIMP1	GADD45B
1.57e-280	0.456487	0.34	0.125	2.31e-276	CD4T_c07-TIMP1	NFKB2
1.59e-280	0.559865	0.54	0.273	2.34e-276	CD4T_c07-TIMP1	BIRC3
2.92e-279	0.506905	0.425	0.183	4.29e-275	CD4T_c07-TIMP1	PRNP
3.55e-276	0.55828	0.714	0.47	5.22e-272	CD4T_c07-TIMP1	HSPE1
3.48e-275	0.608481	0.517	0.261	5.11e-271	CD4T_c07-TIMP1	IDS
5.79e-275	0.484436	0.847	0.681	8.51e-271	CD4T_c07-TIMP1	CALM2
5.72e-272	0.38764	0.266	0.083	8.41e-268	CD4T_c07-TIMP1	KPNA2
3.59e-270	0.34518	0.134	0.025	5.27e-266	CD4T_c07-TIMP1	SGK1
7.44e-268	0.54751	0.618	0.358	1.09e-263	CD4T_c07-TIMP1	NR3C1
4.77e-267	0.504146	0.558	0.295	7.01e-263	CD4T_c07-TIMP1	GNG2
9.76e-263	0.599844	0.672	0.437	1.43e-258	CD4T_c07-TIMP1	SQSTM1
1.89e-261	0.413313	0.305	0.104	2.78e-257	CD4T_c07-TIMP1	RGS1
1.45e-257	0.427408	0.952	0.855	2.13e-253	CD4T_c07-TIMP1	IL7R
1.65e-254	0.452612	0.434	0.19	2.42e-250	CD4T_c07-TIMP1	SYTL3
5.93e-254	0.405282	0.216	0.063	8.72e-250	CD4T_c07-TIMP1	H2AFX
2.23e-253	0.383473	0.193	0.051	3.27e-249	CD4T_c07-TIMP1	ETV3
1.82e-252	0.518709	0.379	0.162	2.67e-248	CD4T_c07-TIMP1	PIM3
1.52e-251	0.492087	0.487	0.242	2.23e-247	CD4T_c07-TIMP1	ARF4
2.5e-250	0.491019	0.64	0.39	3.67e-246	CD4T_c07-TIMP1	RBM8A
2.02e-249	0.470039	0.278	0.099	2.98e-245	CD4T_c07-TIMP1	TUBA1C
7.23e-249	0.472257	0.444	0.206	1.06e-244	CD4T_c07-TIMP1	PPP1CB
1.35e-248	0.421457	0.259	0.085	1.98e-244	CD4T_c07-TIMP1	LGALS3
9.73e-242	0.502313	0.383	0.166	1.43e-237	CD4T_c07-TIMP1	ATP2B1
1.06e-241	0.335068	0.24	0.075	1.56e-237	CD4T_c07-TIMP1	PFKFB3
2.28e-241	0.268053	0.119	0.022	3.35e-237	CD4T_c07-TIMP1	NBL1
2.85e-241	0.344405	0.97	0.916	4.19e-237	CD4T_c07-TIMP1	CALM1
1.71e-239	0.482991	0.406	0.182	2.51e-235	CD4T_c07-TIMP1	IVNS1ABP
5.13e-238	0.392582	0.218	0.065	7.54e-234	CD4T_c07-TIMP1	ZC3H12A
3.04e-237	0.391026	0.224	0.068	4.47e-233	CD4T_c07-TIMP1	RGS2
2.75e-235	0.436877	0.401	0.177	4.04e-231	CD4T_c07-TIMP1	USP36
2.79e-235	0.507751	0.605	0.364	4.11e-231	CD4T_c07-TIMP1	YWHAQ
1.02e-233	0.601197	0.852	0.714	1.5e-229	CD4T_c07-TIMP1	TSC22D3
1.01e-230	0.467908	0.468	0.232	1.49e-226	CD4T_c07-TIMP1	TPM4
1.69e-226	0.390629	0.308	0.119	2.49e-222	CD4T_c07-TIMP1	ETF1
4.2e-223	0.328271	0.944	0.865	6.18e-219	CD4T_c07-TIMP1	MYL6
3.92e-221	0.311499	0.115	0.023	5.76e-217	CD4T_c07-TIMP1	RASGEF1B
8.21e-218	0.514702	0.522	0.291	1.21e-213	CD4T_c07-TIMP1	SDCBP
1.93e-214	0.589369	0.647	0.411	2.84e-210	CD4T_c07-TIMP1	CD69
9.31e-213	0.448611	0.6	0.367	1.37e-208	CD4T_c07-TIMP1	EMD
8.22e-212	0.492356	0.405	0.195	1.21e-207	CD4T_c07-TIMP1	TOB1
4.33e-209	0.458405	0.562	0.33	6.36e-205	CD4T_c07-TIMP1	BZW1
3.58e-208	0.524596	0.441	0.225	5.26e-204	CD4T_c07-TIMP1	SOD2
2.04e-205	0.434358	0.342	0.149	3e-201	CD4T_c07-TIMP1	P2RY10
9.27e-204	0.506457	0.7	0.511	1.36e-199	CD4T_c07-TIMP1	HIST1H4C
1.54e-203	0.45558	0.572	0.327	2.27e-199	CD4T_c07-TIMP1	ITGB1
1.96e-200	0.428291	0.731	0.527	2.87e-196	CD4T_c07-TIMP1	SRSF7
3.39e-200	0.306745	0.158	0.043	4.99e-196	CD4T_c07-TIMP1	AUTS2
6.8e-200	0.344741	0.242	0.086	9.99e-196	CD4T_c07-TIMP1	JOSD1
1.27e-199	0.454664	0.683	0.472	1.86e-195	CD4T_c07-TIMP1	ATP6V0C
4.46e-197	0.332153	0.912	0.784	6.55e-193	CD4T_c07-TIMP1	CYBA
8.03e-197	0.40026	0.312	0.13	1.18e-192	CD4T_c07-TIMP1	PPP1R10
1.77e-195	0.279712	0.148	0.039	2.6e-191	CD4T_c07-TIMP1	CD83
5.75e-195	0.464902	0.47	0.252	8.45e-191	CD4T_c07-TIMP1	GLIPR1
4.17e-194	0.361706	0.297	0.121	6.13e-190	CD4T_c07-TIMP1	PAF1
5.87e-193	0.437891	0.649	0.431	8.63e-189	CD4T_c07-TIMP1	PDCD4
8.07e-193	0.447056	0.372	0.176	1.19e-188	CD4T_c07-TIMP1	CDK17
4.64e-191	0.41862	0.489	0.259	6.83e-187	CD4T_c07-TIMP1	ANXA2
2.73e-190	0.313719	0.962	0.906	4.01e-186	CD4T_c07-TIMP1	GAPDH
6.73e-189	0.445283	0.468	0.249	9.89e-185	CD4T_c07-TIMP1	RNF125
2.31e-188	0.500251	0.66	0.462	3.39e-184	CD4T_c07-TIMP1	TUBA1B
9.72e-188	0.485651	0.448	0.227	1.43e-183	CD4T_c07-TIMP1	KLRB1
6.87e-185	0.400242	0.696	0.446	1.01e-180	CD4T_c07-TIMP1	AHNAK
2.31e-183	0.378149	0.324	0.144	3.39e-179	CD4T_c07-TIMP1	UBE2A
5.41e-183	0.401234	0.747	0.573	7.96e-179	CD4T_c07-TIMP1	PGK1
6.37e-183	0.318313	0.187	0.06	9.37e-179	CD4T_c07-TIMP1	MPZL3
2.02e-182	0.393156	0.349	0.161	2.97e-178	CD4T_c07-TIMP1	PTP4A1
3.11e-182	0.383647	0.281	0.115	4.56e-178	CD4T_c07-TIMP1	IFRD1
3.99e-182	0.389103	0.366	0.173	5.87e-178	CD4T_c07-TIMP1	CRYBG1
7.49e-182	0.408392	0.497	0.278	1.1e-177	CD4T_c07-TIMP1	GSPT1
3.54e-179	0.481007	0.591	0.379	5.2e-175	CD4T_c07-TIMP1	HSPD1
5.18e-178	0.569393	0.498	0.289	7.61e-174	CD4T_c07-TIMP1	JUN
7.16e-176	0.369657	0.645	0.422	1.05e-171	CD4T_c07-TIMP1	EML4
8.16e-176	0.408784	0.504	0.288	1.2e-171	CD4T_c07-TIMP1	HSPA9
6.82e-175	0.436627	0.362	0.177	1e-170	CD4T_c07-TIMP1	PDCL3
1.8e-174	0.498697	0.549	0.345	2.65e-170	CD4T_c07-TIMP1	TXN
9.05e-174	0.482617	0.477	0.271	1.33e-169	CD4T_c07-TIMP1	DDX3X
9.18e-174	0.407867	0.319	0.145	1.35e-169	CD4T_c07-TIMP1	RNF139
9.09e-173	0.436913	0.457	0.253	1.34e-168	CD4T_c07-TIMP1	AC016831.7
1.74e-171	0.352637	0.3	0.129	2.56e-167	CD4T_c07-TIMP1	SOCS3
5.91e-171	0.76463	0.631	0.468	8.69e-167	CD4T_c07-TIMP1	KLF6
9.73e-171	0.425799	0.561	0.346	1.43e-166	CD4T_c07-TIMP1	ALOX5AP
1.01e-170	0.369038	0.762	0.58	1.48e-166	CD4T_c07-TIMP1	SPOCK2
3.42e-170	0.28398	0.148	0.042	5.03e-166	CD4T_c07-TIMP1	SLC7A5
1.44e-168	0.311049	0.256	0.101	2.12e-164	CD4T_c07-TIMP1	NAMPT
5.89e-168	0.450764	0.545	0.335	8.66e-164	CD4T_c07-TIMP1	BTG2
2e-167	0.409864	0.703	0.515	2.94e-163	CD4T_c07-TIMP1	DDX24
2.2e-167	0.434059	0.637	0.447	3.23e-163	CD4T_c07-TIMP1	SRSF2
3.63e-167	0.31651	0.446	0.233	5.33e-163	CD4T_c07-TIMP1	TNFRSF1B
2.63e-166	0.392428	0.656	0.459	3.86e-162	CD4T_c07-TIMP1	POLR2L
5.91e-165	0.417553	0.381	0.195	8.69e-161	CD4T_c07-TIMP1	NFKB1
1.41e-163	0.389714	0.437	0.24	2.08e-159	CD4T_c07-TIMP1	SLC3A2
3.4e-163	0.30154	0.183	0.063	5e-159	CD4T_c07-TIMP1	PRR7
8.29e-162	0.305657	0.238	0.093	1.22e-157	CD4T_c07-TIMP1	SLC39A8
1.44e-161	0.25232	0.136	0.038	2.12e-157	CD4T_c07-TIMP1	IRS2
1.66e-161	0.329801	0.244	0.097	2.44e-157	CD4T_c07-TIMP1	PLEKHA2
8.47e-161	0.352694	0.273	0.117	1.25e-156	CD4T_c07-TIMP1	RUNX3
2.81e-160	0.412815	0.511	0.306	4.13e-156	CD4T_c07-TIMP1	ELOVL5
8.95e-158	0.396425	0.387	0.202	1.32e-153	CD4T_c07-TIMP1	AMD1
7.44e-156	0.39815	0.42	0.222	1.09e-151	CD4T_c07-TIMP1	LGALS1
9.15e-156	0.687479	0.493	0.31	1.35e-151	CD4T_c07-TIMP1	MT2A
2.76e-155	0.318834	0.245	0.098	4.05e-151	CD4T_c07-TIMP1	HOPX
2.95e-154	0.387257	0.671	0.483	4.33e-150	CD4T_c07-TIMP1	SEC61B
1.59e-152	0.36971	0.428	0.236	2.33e-148	CD4T_c07-TIMP1	PPP2CA
7.33e-151	0.41896	0.487	0.293	1.08e-146	CD4T_c07-TIMP1	DDX21
5.16e-150	0.410667	0.277	0.125	7.59e-146	CD4T_c07-TIMP1	INSIG1
6.68e-147	0.4019	0.417	0.233	9.82e-143	CD4T_c07-TIMP1	RBM38
1.28e-146	0.341627	0.322	0.155	1.88e-142	CD4T_c07-TIMP1	IDI1
2.99e-145	0.416177	0.612	0.418	4.4e-141	CD4T_c07-TIMP1	ELF1
5.54e-144	0.300654	0.255	0.11	8.14e-140	CD4T_c07-TIMP1	PNPLA8
8.01e-143	0.390194	0.6	0.404	1.18e-138	CD4T_c07-TIMP1	ARL4C
1.31e-142	0.38724	0.303	0.138	1.92e-138	CD4T_c07-TIMP1	GZMK
5.75e-140	0.278667	0.164	0.057	8.45e-136	CD4T_c07-TIMP1	UAP1
8.05e-136	0.386592	0.918	0.856	1.18e-131	CD4T_c07-TIMP1	RPS26
1.5e-132	0.337961	0.354	0.188	2.21e-128	CD4T_c07-TIMP1	ISCA1
3.43e-132	0.257086	0.166	0.06	5.03e-128	CD4T_c07-TIMP1	AAED1
6.6e-132	0.417335	0.63	0.458	9.7e-128	CD4T_c07-TIMP1	IER2
1.91e-130	0.312342	0.201	0.081	2.81e-126	CD4T_c07-TIMP1	CAPG
4.91e-130	0.260913	0.155	0.053	7.22e-126	CD4T_c07-TIMP1	OASL
6.64e-129	0.56069	0.567	0.411	9.75e-125	CD4T_c07-TIMP1	TUBA4A
1.96e-128	0.33377	0.439	0.258	2.89e-124	CD4T_c07-TIMP1	MAPK1IP1L
3.63e-128	0.264972	0.191	0.075	5.33e-124	CD4T_c07-TIMP1	NANS
2.95e-127	0.304813	0.975	0.965	4.33e-123	CD4T_c07-TIMP1	RPL41
3.73e-127	0.361944	0.317	0.163	5.48e-123	CD4T_c07-TIMP1	YIPF5
1.3e-126	0.478193	0.156	0.054	1.91e-122	CD4T_c07-TIMP1	HSPA1B
1.45e-126	0.369934	0.613	0.438	2.13e-122	CD4T_c07-TIMP1	PRDX1
1.91e-126	0.377119	0.381	0.213	2.81e-122	CD4T_c07-TIMP1	ARID5A
3.21e-124	0.343275	0.536	0.352	4.72e-120	CD4T_c07-TIMP1	RNF149
7.06e-124	0.277915	0.94	0.89	1.04e-119	CD4T_c07-TIMP1	MT-ND2
2.25e-123	0.370518	0.656	0.486	3.3e-119	CD4T_c07-TIMP1	LRRFIP1
9.16e-123	0.355529	0.329	0.174	1.35e-118	CD4T_c07-TIMP1	HNRNPAB
1.36e-121	0.463402	0.511	0.357	1.99e-117	CD4T_c07-TIMP1	ICAM2
4.08e-120	0.36138	0.322	0.171	5.99e-116	CD4T_c07-TIMP1	PLIN2
3.31e-119	0.355005	0.602	0.424	4.86e-115	CD4T_c07-TIMP1	EIF5
8.44e-118	0.297704	0.387	0.216	1.24e-113	CD4T_c07-TIMP1	STAT4
3.65e-117	0.255279	0.172	0.067	5.36e-113	CD4T_c07-TIMP1	DDIT3
4.35e-117	0.341992	0.653	0.493	6.39e-113	CD4T_c07-TIMP1	SNU13
8.32e-117	0.258004	0.217	0.094	1.22e-112	CD4T_c07-TIMP1	PPP1R16B
4.45e-116	0.303757	0.267	0.13	6.54e-112	CD4T_c07-TIMP1	OSER1
9.95e-116	0.308392	0.286	0.144	1.46e-111	CD4T_c07-TIMP1	ALG13
8.43e-115	0.377954	0.308	0.166	1.24e-110	CD4T_c07-TIMP1	NINJ1
1.23e-114	0.307829	0.285	0.142	1.81e-110	CD4T_c07-TIMP1	GPCPD1
3.43e-114	0.335406	0.585	0.418	5.04e-110	CD4T_c07-TIMP1	SNRPG
5.22e-114	0.283219	0.806	0.698	7.68e-110	CD4T_c07-TIMP1	SUB1
1.07e-113	0.314636	0.309	0.16	1.57e-109	CD4T_c07-TIMP1	B4GALT1
4.18e-113	0.296133	0.257	0.123	6.14e-109	CD4T_c07-TIMP1	PBX4
1.3e-112	0.297722	0.643	0.463	1.91e-108	CD4T_c07-TIMP1	UBE2B
1.66e-112	0.294923	0.282	0.14	2.44e-108	CD4T_c07-TIMP1	ZBTB1
4.76e-112	0.352683	0.393	0.233	7e-108	CD4T_c07-TIMP1	EIF4A1
2e-111	0.346845	0.394	0.233	2.94e-107	CD4T_c07-TIMP1	CMTM6
2.26e-111	0.463252	0.653	0.519	3.32e-107	CD4T_c07-TIMP1	H2AFZ
3.15e-111	0.255066	0.125	0.042	4.63e-107	CD4T_c07-TIMP1	ANKRD28
6.13e-111	0.26179	0.214	0.095	9.01e-107	CD4T_c07-TIMP1	SEC23B
5.97e-110	0.305454	0.408	0.243	8.78e-106	CD4T_c07-TIMP1	REEP5
6.38e-110	0.285205	0.224	0.103	9.38e-106	CD4T_c07-TIMP1	OAT
9.13e-109	0.32066	0.698	0.56	1.34e-104	CD4T_c07-TIMP1	SAP18
1.73e-108	0.28123	0.85	0.76	2.54e-104	CD4T_c07-TIMP1	SKP1
2.15e-106	0.277011	0.294	0.152	3.16e-102	CD4T_c07-TIMP1	RAB8B
4.61e-106	0.382365	0.571	0.399	6.77e-102	CD4T_c07-TIMP1	IRF1
6.86e-106	0.255835	0.208	0.092	1.01e-101	CD4T_c07-TIMP1	MYBL1
4.17e-105	0.325194	0.323	0.179	6.13e-101	CD4T_c07-TIMP1	ZFAND5
7.6e-105	0.346436	0.524	0.359	1.12e-100	CD4T_c07-TIMP1	MAP1LC3B
2.65e-104	0.396131	0.109	0.035	3.89e-100	CD4T_c07-TIMP1	CEBPD
1.78e-102	0.362742	0.524	0.365	2.62e-98	CD4T_c07-TIMP1	HNRNPUL1
3.9e-102	0.329015	0.476	0.313	5.73e-98	CD4T_c07-TIMP1	GPBP1
2.39e-101	0.317947	0.386	0.232	3.51e-97	CD4T_c07-TIMP1	JPT1
5.71e-101	0.266973	0.85	0.757	8.39e-97	CD4T_c07-TIMP1	EMP3
6.09e-101	0.306021	0.36	0.209	8.95e-97	CD4T_c07-TIMP1	TOP1
1.87e-100	0.280906	0.196	0.087	2.75e-96	CD4T_c07-TIMP1	ZNF267
4.11e-100	0.266416	0.186	0.081	6.04e-96	CD4T_c07-TIMP1	JMJD6
9.23e-100	0.342366	0.354	0.209	1.36e-95	CD4T_c07-TIMP1	RILPL2
3.36e-98	0.320593	0.406	0.254	4.94e-94	CD4T_c07-TIMP1	SSR3
5.57e-98	0.275064	0.257	0.131	8.19e-94	CD4T_c07-TIMP1	GRPEL1
1.73e-97	0.256307	0.213	0.1	2.55e-93	CD4T_c07-TIMP1	PPIL4
2e-97	0.281616	0.261	0.133	2.94e-93	CD4T_c07-TIMP1	STOM
1.01e-96	0.277606	0.404	0.244	1.48e-92	CD4T_c07-TIMP1	ANXA5
3.83e-96	0.341519	0.422	0.267	5.62e-92	CD4T_c07-TIMP1	TIMP1
7.34e-96	0.309523	0.564	0.403	1.08e-91	CD4T_c07-TIMP1	SAT1
2.66e-95	0.294032	0.681	0.533	3.91e-91	CD4T_c07-TIMP1	CALR
2e-94	0.326053	0.768	0.655	2.94e-90	CD4T_c07-TIMP1	CD44
4.31e-94	0.279725	0.287	0.155	6.34e-90	CD4T_c07-TIMP1	SELENOS
7.58e-94	0.314157	0.632	0.484	1.11e-89	CD4T_c07-TIMP1	CDC37
6.13e-93	0.300429	0.321	0.183	9.01e-89	CD4T_c07-TIMP1	NASP
6.19e-93	0.252743	0.236	0.118	9.09e-89	CD4T_c07-TIMP1	PLEKHB2
1.46e-92	0.489517	0.349	0.214	2.15e-88	CD4T_c07-TIMP1	MT1X
3.32e-92	0.25599	0.244	0.123	4.88e-88	CD4T_c07-TIMP1	MTHFD2
6.81e-92	0.274985	0.44	0.28	1e-87	CD4T_c07-TIMP1	RORA
1.81e-91	0.263334	0.275	0.145	2.66e-87	CD4T_c07-TIMP1	DDX3Y
1.84e-90	0.370145	0.337	0.2	2.71e-86	CD4T_c07-TIMP1	SLC38A2
3.16e-90	0.251469	0.222	0.11	4.65e-86	CD4T_c07-TIMP1	ZPR1
4.26e-90	0.265166	0.251	0.131	6.26e-86	CD4T_c07-TIMP1	MORF4L2
2.15e-89	0.272426	0.329	0.191	3.16e-85	CD4T_c07-TIMP1	NR1H2
2.24e-89	0.28659	0.34	0.2	3.29e-85	CD4T_c07-TIMP1	DNTTIP2
3.98e-89	0.292751	0.763	0.67	5.85e-85	CD4T_c07-TIMP1	NCL
9.11e-89	0.271161	0.771	0.669	1.34e-84	CD4T_c07-TIMP1	SLC25A3
5.73e-88	0.3325	0.29	0.161	8.42e-84	CD4T_c07-TIMP1	ID2
7.88e-88	0.294241	0.467	0.314	1.16e-83	CD4T_c07-TIMP1	MAGOH
1.05e-87	0.254246	0.214	0.104	1.55e-83	CD4T_c07-TIMP1	RNF168
1.2e-87	0.328783	0.351	0.212	1.76e-83	CD4T_c07-TIMP1	MAT2A
2.35e-86	0.278765	0.372	0.228	3.45e-82	CD4T_c07-TIMP1	CHD1
2.53e-86	0.270198	0.224	0.113	3.72e-82	CD4T_c07-TIMP1	FBXO34
3.4e-86	0.272713	0.334	0.196	5e-82	CD4T_c07-TIMP1	YWHAE
5.16e-86	0.255157	0.351	0.207	7.58e-82	CD4T_c07-TIMP1	CNOT6L
5.01e-85	0.308835	0.379	0.24	7.37e-81	CD4T_c07-TIMP1	NSMCE3
1.01e-84	0.271104	0.288	0.162	1.49e-80	CD4T_c07-TIMP1	RHEB
3.21e-82	0.28173	0.376	0.234	4.71e-78	CD4T_c07-TIMP1	CCND2
3.49e-82	0.274206	0.543	0.39	5.13e-78	CD4T_c07-TIMP1	H2AFV
9.26e-82	0.293383	0.709	0.603	1.36e-77	CD4T_c07-TIMP1	NDUFS5
9.45e-81	0.257108	0.26	0.143	1.39e-76	CD4T_c07-TIMP1	TXNDC17
4.95e-80	0.251667	0.223	0.115	7.27e-76	CD4T_c07-TIMP1	TGIF1
6.86e-79	0.292367	0.36	0.227	1.01e-74	CD4T_c07-TIMP1	AKIRIN1
2.06e-77	0.441436	0.181	0.09	3.03e-73	CD4T_c07-TIMP1	GLUL
4.65e-77	0.269835	0.467	0.326	6.83e-73	CD4T_c07-TIMP1	STRAP
7.22e-75	0.305851	0.477	0.343	1.06e-70	CD4T_c07-TIMP1	RPL22L1
5.23e-74	0.356533	0.127	0.054	7.68e-70	CD4T_c07-TIMP1	MT1E
3.21e-73	0.258552	0.274	0.159	4.71e-69	CD4T_c07-TIMP1	UBE2J1
3.29e-72	0.407945	0.622	0.52	4.83e-68	CD4T_c07-TIMP1	ZFP36L1
3.79e-72	0.301003	0.513	0.382	5.57e-68	CD4T_c07-TIMP1	PIK3R1
1.17e-71	0.390096	0.541	0.423	1.73e-67	CD4T_c07-TIMP1	FAM107B
1.73e-71	0.424912	0.386	0.266	2.55e-67	CD4T_c07-TIMP1	CITED2
3.22e-70	0.289165	0.6	0.468	4.73e-66	CD4T_c07-TIMP1	EIF4G2
8.19e-69	0.36555	0.349	0.231	1.2e-64	CD4T_c07-TIMP1	GATA3
6.36e-67	0.253381	0.443	0.308	9.35e-63	CD4T_c07-TIMP1	RPN1
2.93e-66	0.253341	0.276	0.165	4.31e-62	CD4T_c07-TIMP1	TBCC
8.81e-66	0.275482	0.236	0.132	1.29e-61	CD4T_c07-TIMP1	CXCR3
1.74e-65	0.257067	0.3	0.186	2.56e-61	CD4T_c07-TIMP1	RELA
2.32e-65	0.25276	0.665	0.553	3.41e-61	CD4T_c07-TIMP1	ARF1
1.52e-63	0.269455	0.85	0.812	2.23e-59	CD4T_c07-TIMP1	RPL36A
2.76e-63	0.281354	0.626	0.522	4.06e-59	CD4T_c07-TIMP1	ISG20
1.92e-62	0.281053	0.491	0.363	2.83e-58	CD4T_c07-TIMP1	ARL6IP1
1.94e-57	0.257949	0.281	0.176	2.85e-53	CD4T_c07-TIMP1	POLR2A
8.75e-55	0.266145	0.513	0.397	1.29e-50	CD4T_c07-TIMP1	XBP1
1.24e-54	0.266763	0.399	0.284	1.82e-50	CD4T_c07-TIMP1	ORAI1
3.35e-44	0.251658	0.556	0.46	4.92e-40	CD4T_c07-TIMP1	ITM2A
1.75e-34	0.261871	0.419	0.336	2.58e-30	CD4T_c07-TIMP1	S1PR1
7.94e-34	0.28966	0.417	0.338	1.17e-29	CD4T_c07-TIMP1	CLEC2B
1.1e-29	0.280788	0.61	0.571	1.62e-25	CD4T_c07-TIMP1	LITAF
1.89e-17	0.621093	0.18	0.133	2.78e-13	CD4T_c07-TIMP1	HSPA1A
0.000283	0.267151	0.498	0.52	1	CD4T_c07-TIMP1	CCR7
0	1.95502	0.961	0.247	0	CD4T_c08-GZMK	DUSP2
0	1.79404	0.949	0.455	0	CD4T_c08-GZMK	ZFP36
0	1.77051	0.975	0.47	0	CD4T_c08-GZMK	CXCR4
0	1.68527	0.96	0.212	0	CD4T_c08-GZMK	CREM
0	1.6489	0.729	0.089	0	CD4T_c08-GZMK	DUSP5
0	1.59283	0.994	0.59	0	CD4T_c08-GZMK	SRGN
0	1.54279	0.725	0.12	0	CD4T_c08-GZMK	GZMK
0	1.52513	0.924	0.319	0	CD4T_c08-GZMK	TNFAIP3
0	1.49788	0.845	0.148	0	CD4T_c08-GZMK	NR4A2
0	1.49254	0.804	0.109	0	CD4T_c08-GZMK	TENT5C
0	1.44055	0.602	0.112	0	CD4T_c08-GZMK	LMNA
0	1.41821	0.362	0.058	0	CD4T_c08-GZMK	CCL4
0	1.38776	0.648	0.09	0	CD4T_c08-GZMK	RGS1
0	1.38105	0.802	0.163	0	CD4T_c08-GZMK	GZMA
0	1.37051	0.844	0.201	0	CD4T_c08-GZMK	CST7
0	1.37017	0.852	0.212	0	CD4T_c08-GZMK	CCL5
0	1.35293	0.926	0.541	0	CD4T_c08-GZMK	ANXA1
0	1.34703	0.786	0.373	0	CD4T_c08-GZMK	RGCC
0	1.30514	0.633	0.306	0	CD4T_c08-GZMK	MT2A
0	1.30359	0.629	0.182	0	CD4T_c08-GZMK	MYADM
0	1.29588	0.607	0.068	0	CD4T_c08-GZMK	CDKN1A
0	1.27256	0.835	0.244	0	CD4T_c08-GZMK	SAMSN1
0	1.25755	0.741	0.221	0	CD4T_c08-GZMK	REL
0	1.24127	0.847	0.345	0	CD4T_c08-GZMK	SLC2A3
0	1.23278	0.889	0.441	0	CD4T_c08-GZMK	EZR
0	1.21716	0.784	0.225	0	CD4T_c08-GZMK	FAM177A1
0	1.21676	0.995	0.972	0	CD4T_c08-GZMK	FTH1
0	1.21266	0.761	0.207	0	CD4T_c08-GZMK	PDE4B
0	1.21102	0.259	0.018	0	CD4T_c08-GZMK	IFNG
0	1.20166	0.832	0.309	0	CD4T_c08-GZMK	YPEL5
0	1.19508	0.677	0.147	0	CD4T_c08-GZMK	PTGER4
0	1.16177	0.666	0.163	0	CD4T_c08-GZMK	ZNF331
0	1.15087	0.668	0.153	0	CD4T_c08-GZMK	VPS37B
0	1.13142	0.826	0.425	0	CD4T_c08-GZMK	MCL1
0	1.11963	0.608	0.163	0	CD4T_c08-GZMK	ATP1B3
0	1.10905	0.809	0.356	0	CD4T_c08-GZMK	HSPA5
0	1.1064	0.673	0.183	0	CD4T_c08-GZMK	SYTL3
0	1.09297	0.596	0.083	0	CD4T_c08-GZMK	FOSL2
0	1.09014	0.582	0.188	0	CD4T_c08-GZMK	NFKB1
0	1.08545	0.504	0.057	0	CD4T_c08-GZMK	DUSP4
0	1.07516	0.589	0.224	0	CD4T_c08-GZMK	KLRB1
0	1.07307	0.733	0.406	0	CD4T_c08-GZMK	TUBA4A
0	1.05926	0.986	0.874	0	CD4T_c08-GZMK	UBC
0	1.05706	0.844	0.361	0	CD4T_c08-GZMK	SELENOK
0	1.04101	0.977	0.863	0	CD4T_c08-GZMK	ZFP36L2
0	1.03588	0.8	0.321	0	CD4T_c08-GZMK	DNAJA1
0	1.01748	0.66	0.296	0	CD4T_c08-GZMK	ADGRE5
0	1.00099	0.675	0.201	0	CD4T_c08-GZMK	SH2D2A
0	0.999476	0.873	0.546	0	CD4T_c08-GZMK	LDHA
0	0.989576	0.484	0.075	0	CD4T_c08-GZMK	SKIL
0	0.981904	0.482	0.12	0	CD4T_c08-GZMK	IFNGR1
0	0.980475	0.502	0.146	0	CD4T_c08-GZMK	FOS
0	0.976547	0.724	0.32	0	CD4T_c08-GZMK	DDIT4
0	0.973241	0.79	0.47	0	CD4T_c08-GZMK	HSPE1
0	0.971379	0.471	0.082	0	CD4T_c08-GZMK	BHLHE40
0	0.968376	0.57	0.186	0	CD4T_c08-GZMK	ICOS
0	0.965362	0.47	0.079	0	CD4T_c08-GZMK	KDM6B
0	0.96285	0.63	0.273	0	CD4T_c08-GZMK	BIRC3
0	0.960696	0.429	0.052	0	CD4T_c08-GZMK	MAP3K8
0	0.955624	0.914	0.64	0	CD4T_c08-GZMK	JUNB
0	0.952787	0.694	0.293	0	CD4T_c08-GZMK	GNG2
0	0.948009	0.728	0.376	0	CD4T_c08-GZMK	HSPD1
0	0.940452	0.8	0.439	0	CD4T_c08-GZMK	TGFB1
0	0.938578	0.854	0.524	0	CD4T_c08-GZMK	SRSF7
0	0.936181	0.426	0.045	0	CD4T_c08-GZMK	NR4A3
0	0.932575	0.686	0.247	0	CD4T_c08-GZMK	NFE2L2
0	0.92756	0.571	0.124	0	CD4T_c08-GZMK	BCL3
0	0.92359	0.33	0.054	0	CD4T_c08-GZMK	FOSB
0	0.921763	0.461	0.097	0	CD4T_c08-GZMK	TIPARP
0	0.921444	0.614	0.248	0	CD4T_c08-GZMK	AC016831.7
0	0.909282	0.574	0.144	0	CD4T_c08-GZMK	RELB
0	0.90421	0.74	0.356	0	CD4T_c08-GZMK	NR3C1
0	0.902374	0.553	0.169	0	CD4T_c08-GZMK	RNF19A
0	0.900788	0.696	0.375	0	CD4T_c08-GZMK	PIK3R1
0	0.897558	0.59	0.209	0	CD4T_c08-GZMK	STAT4
0	0.896264	0.166	0.008	0	CD4T_c08-GZMK	XCL1
0	0.88744	0.732	0.411	0	CD4T_c08-GZMK	CD69
0	0.874713	0.773	0.419	0	CD4T_c08-GZMK	EML4
0	0.871033	0.62	0.207	0	CD4T_c08-GZMK	TUBB4B
0	0.869842	0.621	0.248	0	CD4T_c08-GZMK	GLIPR1
0	0.868809	0.937	0.742	0	CD4T_c08-GZMK	CD74
0	0.866908	0.514	0.164	0	CD4T_c08-GZMK	PLIN2
0	0.857882	0.703	0.343	0	CD4T_c08-GZMK	ALOX5AP
0	0.851538	0.813	0.441	0	CD4T_c08-GZMK	SFPQ
0	0.847853	0.667	0.273	0	CD4T_c08-GZMK	GSPT1
0	0.843608	0.556	0.173	0	CD4T_c08-GZMK	USP36
0	0.841175	0.405	0.059	0	CD4T_c08-GZMK	ZC3H12A
0	0.832856	0.458	0.154	0	CD4T_c08-GZMK	HLA-DRB1
0	0.829724	0.327	0.035	0	CD4T_c08-GZMK	SLC7A5
0	0.828267	0.459	0.094	0	CD4T_c08-GZMK	NAMPT
0	0.827902	0.457	0.115	0	CD4T_c08-GZMK	PBX4
0	0.827443	0.642	0.227	0	CD4T_c08-GZMK	TNFRSF1B
0	0.827155	0.993	0.967	0	CD4T_c08-GZMK	BTG1
0	0.825921	0.685	0.332	0	CD4T_c08-GZMK	BTG2
0	0.823693	0.471	0.103	0	CD4T_c08-GZMK	CSRNP1
0	0.820957	0.336	0.05	0	CD4T_c08-GZMK	PDCD1
0	0.819845	0.542	0.165	0	CD4T_c08-GZMK	SYAP1
0	0.819525	0.94	0.734	0	CD4T_c08-GZMK	HSP90AA1
0	0.81837	0.487	0.154	0	CD4T_c08-GZMK	HSPH1
0	0.817215	0.997	0.936	0	CD4T_c08-GZMK	H3F3B
0	0.812259	0.527	0.171	0	CD4T_c08-GZMK	CDK17
0	0.806735	0.503	0.143	0	CD4T_c08-GZMK	SOCS1
0	0.800562	0.515	0.206	0	CD4T_c08-GZMK	NFKBIZ
0	0.796159	0.617	0.29	0	CD4T_c08-GZMK	SDCBP
0	0.795423	0.523	0.212	0	CD4T_c08-GZMK	GADD45B
0	0.788096	0.483	0.175	0	CD4T_c08-GZMK	PDCL3
0	0.787469	0.804	0.487	0	CD4T_c08-GZMK	DNAJB1
0	0.780671	0.488	0.149	0	CD4T_c08-GZMK	IDI1
0	0.778158	0.585	0.262	0	CD4T_c08-GZMK	IDS
0	0.77636	0.979	0.915	0	CD4T_c08-GZMK	HSPA8
0	0.774124	0.424	0.078	0	CD4T_c08-GZMK	KPNA2
0	0.768319	0.356	0.052	0	CD4T_c08-GZMK	ELL2
0	0.767678	0.388	0.07	0	CD4T_c08-GZMK	PFKFB3
0	0.767131	0.756	0.429	0	CD4T_c08-GZMK	PDCD4
0	0.767004	0.468	0.162	0	CD4T_c08-GZMK	PIM3
0	0.764834	0.577	0.248	0	CD4T_c08-GZMK	RNF125
0	0.763464	0.66	0.315	0	CD4T_c08-GZMK	G3BP2
0	0.761273	0.515	0.204	0	CD4T_c08-GZMK	CEMIP2
0	0.760733	0.308	0.037	0	CD4T_c08-GZMK	CXCR6
0	0.760493	0.451	0.118	0	CD4T_c08-GZMK	PTPN22
0	0.76041	0.324	0.047	0	CD4T_c08-GZMK	PHLDA1
0	0.759792	0.732	0.38	0	CD4T_c08-GZMK	FYN
0	0.757385	0.647	0.279	0	CD4T_c08-GZMK	DNAJB6
0	0.751639	0.292	0.038	0	CD4T_c08-GZMK	AUTS2
0	0.749547	0.503	0.171	0	CD4T_c08-GZMK	GPR65
0	0.737659	0.339	0.046	0	CD4T_c08-GZMK	OASL
0	0.728834	0.548	0.204	0	CD4T_c08-GZMK	PPP1CB
0	0.725263	0.45	0.124	0	CD4T_c08-GZMK	NFKB2
0	0.724363	0.605	0.305	0	CD4T_c08-GZMK	ELOVL5
0	0.722225	0.397	0.121	0	CD4T_c08-GZMK	INSIG1
0	0.716447	0.752	0.445	0	CD4T_c08-GZMK	SRSF2
0	0.714337	0.565	0.256	0	CD4T_c08-GZMK	CCNH
0	0.712473	0.255	0.035	0	CD4T_c08-GZMK	CD83
0	0.711573	0.469	0.159	0	CD4T_c08-GZMK	PTP4A1
0	0.705841	0.34	0.065	0	CD4T_c08-GZMK	RGS2
0	0.704495	0.671	0.334	0	CD4T_c08-GZMK	BRD2
0	0.704153	0.478	0.145	0	CD4T_c08-GZMK	RAB8B
0	0.702938	0.406	0.105	0	CD4T_c08-GZMK	UBE2S
0	0.702689	0.801	0.513	0	CD4T_c08-GZMK	DDX24
0	0.701033	0.49	0.152	0	CD4T_c08-GZMK	DNAJB9
0	0.700195	0.455	0.159	0	CD4T_c08-GZMK	YIPF5
0	0.691932	0.358	0.053	0	CD4T_c08-GZMK	GZMH
0	0.690709	0.457	0.162	0	CD4T_c08-GZMK	PPP1R15A
0	0.690491	0.407	0.108	0	CD4T_c08-GZMK	SC5D
0	0.686741	0.675	0.328	0	CD4T_c08-GZMK	BZW1
0	0.68636	0.44	0.157	0	CD4T_c08-GZMK	B4GALT1
0	0.68418	0.557	0.228	0	CD4T_c08-GZMK	HERPUD1
0	0.68367	0.505	0.155	0	CD4T_c08-GZMK	EIF4A3
0	0.681213	0.899	0.685	0	CD4T_c08-GZMK	UBB
0	0.678224	0.38	0.107	0	CD4T_c08-GZMK	FBXO34
0	0.677483	0.417	0.125	0	CD4T_c08-GZMK	ARAP2
0	0.676553	0.41	0.112	0	CD4T_c08-GZMK	NAA50
0	0.672799	0.525	0.223	0	CD4T_c08-GZMK	CHD1
0	0.667435	0.943	0.782	0	CD4T_c08-GZMK	YWHAZ
0	0.662796	0.423	0.145	0	CD4T_c08-GZMK	RALGAPA1
0	0.662173	0.66	0.314	0	CD4T_c08-GZMK	DUSP1
0	0.652761	0.399	0.126	0	CD4T_c08-GZMK	CXCR3
0	0.650085	0.227	0.05	0	CD4T_c08-GZMK	MT1E
0	0.645178	0.534	0.231	0	CD4T_c08-GZMK	RBM38
0	0.64399	0.384	0.104	0	CD4T_c08-GZMK	IL2RB
0	0.642952	0.271	0.057	0	CD4T_c08-GZMK	AREG
0	0.642247	0.557	0.243	0	CD4T_c08-GZMK	ARF4
0	0.62491	0.256	0.035	0	CD4T_c08-GZMK	FRMD4B
0	0.62334	0.467	0.169	0	CD4T_c08-GZMK	JUND
0	0.618397	0.4	0.129	0	CD4T_c08-GZMK	PPP1R10
0	0.615748	0.68	0.367	0	CD4T_c08-GZMK	EMD
0	0.615305	0.37	0.113	0	CD4T_c08-GZMK	CHMP1B
0	0.609772	0.998	0.992	0	CD4T_c08-GZMK	HLA-A
0	0.607347	0.349	0.089	0	CD4T_c08-GZMK	PPP1R16B
0	0.606476	0.409	0.117	0	CD4T_c08-GZMK	ETF1
0	0.602337	0.415	0.128	0	CD4T_c08-GZMK	STOM
0	0.601603	0.869	0.683	0	CD4T_c08-GZMK	CALM2
0	0.59714	0.267	0.05	0	CD4T_c08-GZMK	ETV3
0	0.596691	0.304	0.071	0	CD4T_c08-GZMK	SERTAD1
0	0.593974	0.342	0.095	0	CD4T_c08-GZMK	PLEKHA2
0	0.593968	0.365	0.114	0	CD4T_c08-GZMK	IFRD1
0	0.593733	0.413	0.135	0	CD4T_c08-GZMK	ZBTB1
0	0.593274	0.959	0.863	0	CD4T_c08-GZMK	PTPRC
0	0.587244	0.988	0.911	0	CD4T_c08-GZMK	IL32
0	0.577388	0.127	0.007	0	CD4T_c08-GZMK	THBS1
0	0.576823	0.373	0.115	0	CD4T_c08-GZMK	RUNX3
0	0.565267	0.323	0.085	0	CD4T_c08-GZMK	JOSD1
0	0.557918	0.298	0.071	0	CD4T_c08-GZMK	TGFBR3
0	0.557833	0.312	0.077	0	CD4T_c08-GZMK	GABARAPL1
0	0.553517	0.407	0.133	0	CD4T_c08-GZMK	ACTN4
0	0.552392	0.271	0.036	0	CD4T_c08-GZMK	TRAF4
0	0.548963	0.318	0.082	0	CD4T_c08-GZMK	PER1
0	0.539516	0.274	0.064	0	CD4T_c08-GZMK	SLC16A3
0	0.53844	0.954	0.865	0	CD4T_c08-GZMK	MYL6
0	0.526226	0.259	0.041	0	CD4T_c08-GZMK	STX11
0	0.525946	0.218	0.034	0	CD4T_c08-GZMK	GNA15
0	0.51279	0.937	0.785	0	CD4T_c08-GZMK	CYBA
0	0.511621	0.225	0.038	0	CD4T_c08-GZMK	TNFSF14
0	0.50424	0.213	0.021	0	CD4T_c08-GZMK	IL12RB2
0	0.50411	0.204	0.028	0	CD4T_c08-GZMK	PLAUR
0	0.496306	0.221	0.036	0	CD4T_c08-GZMK	TUBB2A
0	0.486612	0.993	0.981	0	CD4T_c08-GZMK	EIF1
0	0.486603	0.148	0.018	0	CD4T_c08-GZMK	HES4
0	0.482981	0.222	0.034	0	CD4T_c08-GZMK	TESC
0	0.48035	0.999	0.988	0	CD4T_c08-GZMK	HLA-C
0	0.471994	0.257	0.056	0	CD4T_c08-GZMK	ANKRD37
0	0.466903	0.229	0.044	0	CD4T_c08-GZMK	DHCR7
0	0.453022	0.208	0.042	0	CD4T_c08-GZMK	BCL2L11
0	0.436013	1	1	0	CD4T_c08-GZMK	B2M
0	0.434071	0.137	0.01	0	CD4T_c08-GZMK	ENC1
0	0.417754	0.169	0.028	0	CD4T_c08-GZMK	NR4A1
0	0.403819	0.156	0.022	0	CD4T_c08-GZMK	RASGEF1B
0	0.367519	0.139	0.009	0	CD4T_c08-GZMK	GPR35
0	0.359078	0.997	0.997	0	CD4T_c08-GZMK	MT-CO1
0	0.352953	0.155	0.021	0	CD4T_c08-GZMK	GRAMD1B
0	0.340616	0.152	0.017	0	CD4T_c08-GZMK	PDE4A
3.51e-307	0.632153	0.498	0.202	5.16e-303	CD4T_c08-GZMK	CNOT6L
1.11e-303	0.67273	0.396	0.139	1.62e-299	CD4T_c08-GZMK	GPCPD1
1.12e-303	0.632389	0.535	0.232	1.65e-299	CD4T_c08-GZMK	TPM4
1.82e-303	0.624719	0.42	0.154	2.67e-299	CD4T_c08-GZMK	TANK
4.19e-302	0.6331	0.4	0.142	6.16e-298	CD4T_c08-GZMK	PLK3
2.95e-301	0.259106	0.106	0.012	4.33e-297	CD4T_c08-GZMK	IL18RAP
1.79e-300	0.905131	0.601	0.318	2.63e-296	CD4T_c08-GZMK	GPR183
1.43e-296	0.491695	0.962	0.907	2.1e-292	CD4T_c08-GZMK	GAPDH
1.48e-294	0.729721	0.573	0.276	2.17e-290	CD4T_c08-GZMK	RORA
2.8e-293	0.780636	0.591	0.288	4.11e-289	CD4T_c08-GZMK	JUN
5.16e-292	0.670134	0.176	0.033	7.58e-288	CD4T_c08-GZMK	CEBPD
4.47e-290	0.6826	0.565	0.271	6.56e-286	CD4T_c08-GZMK	DDX3X
1.06e-289	0.287605	0.104	0.012	1.56e-285	CD4T_c08-GZMK	ATP1B1
4.52e-289	0.702425	0.694	0.396	6.64e-285	CD4T_c08-GZMK	IRF1
1.42e-288	0.583784	0.539	0.241	2.09e-284	CD4T_c08-GZMK	GTF2B
1.87e-287	0.454278	0.995	0.989	2.75e-283	CD4T_c08-GZMK	HLA-B
1.89e-287	0.595444	0.921	0.778	2.77e-283	CD4T_c08-GZMK	HSP90AB1
1.48e-283	0.659762	0.805	0.558	2.17e-279	CD4T_c08-GZMK	LCP1
1.72e-279	0.61461	0.592	0.3	2.52e-275	CD4T_c08-GZMK	CYCS
1.08e-277	0.411839	0.184	0.038	1.59e-273	CD4T_c08-GZMK	SLC1A5
7.31e-275	0.41829	0.253	0.066	1.07e-270	CD4T_c08-GZMK	CKS2
9.04e-275	0.55124	0.257	0.068	1.33e-270	CD4T_c08-GZMK	LINC01871
8.85e-272	0.333286	0.381	0.131	1.3e-267	CD4T_c08-GZMK	NKG7
4.52e-271	0.5481	0.419	0.161	6.64e-267	CD4T_c08-GZMK	CSNK1D
5.69e-269	0.620494	0.643	0.351	8.36e-265	CD4T_c08-GZMK	AKAP13
1.51e-268	0.674037	0.706	0.44	2.22e-264	CD4T_c08-GZMK	SQSTM1
4.96e-267	0.542117	0.515	0.231	7.29e-263	CD4T_c08-GZMK	BCAS2
7.43e-266	0.559634	0.383	0.136	1.09e-261	CD4T_c08-GZMK	CYTOR
1.34e-265	0.654278	0.443	0.184	1.97e-261	CD4T_c08-GZMK	IVNS1ABP
5.12e-265	0.265935	0.107	0.014	7.52e-261	CD4T_c08-GZMK	CLU
2.35e-264	0.576284	0.577	0.288	3.45e-260	CD4T_c08-GZMK	HSPA9
2.04e-263	0.499138	0.285	0.085	3e-259	CD4T_c08-GZMK	ZNF267
1.09e-262	0.370416	0.151	0.027	1.61e-258	CD4T_c08-GZMK	MCOLN2
3.04e-262	0.484246	0.331	0.109	4.47e-258	CD4T_c08-GZMK	PNPLA8
3.24e-261	0.502174	0.387	0.144	4.76e-257	CD4T_c08-GZMK	UBE2A
9.72e-261	0.56005	0.51	0.224	1.43e-256	CD4T_c08-GZMK	HLA-DPA1
1.74e-258	0.432941	0.175	0.036	2.56e-254	CD4T_c08-GZMK	ZEB2
5.46e-256	0.590104	0.773	0.531	8.03e-252	CD4T_c08-GZMK	CALR
1.52e-254	0.648864	0.404	0.158	2.23e-250	CD4T_c08-GZMK	ID2
6.96e-253	0.606618	0.811	0.58	1.02e-248	CD4T_c08-GZMK	SPOCK2
7.81e-252	0.536607	0.395	0.15	1.15e-247	CD4T_c08-GZMK	P2RY10
4.74e-248	0.504759	0.301	0.098	6.97e-244	CD4T_c08-GZMK	RARA
3.48e-247	0.471049	0.416	0.161	5.11e-243	CD4T_c08-GZMK	EFHD2
1.71e-243	0.586426	0.628	0.35	2.51e-239	CD4T_c08-GZMK	RNF149
4.6e-243	0.556405	0.44	0.187	6.77e-239	CD4T_c08-GZMK	PRNP
5.58e-242	0.784009	0.885	0.744	8.2e-238	CD4T_c08-GZMK	CRIP1
4.93e-240	0.564455	0.748	0.503	7.25e-236	CD4T_c08-GZMK	PDIA3
1.88e-239	0.405926	0.965	0.917	2.76e-235	CD4T_c08-GZMK	CALM1
9.78e-238	0.452092	0.264	0.079	1.44e-233	CD4T_c08-GZMK	JMJD6
1.71e-237	0.436911	0.91	0.812	2.51e-233	CD4T_c08-GZMK	OAZ1
1.76e-236	0.569727	0.803	0.584	2.59e-232	CD4T_c08-GZMK	CD2
1.03e-234	0.393417	0.229	0.062	1.51e-230	CD4T_c08-GZMK	IER5
1.7e-234	0.557491	0.557	0.282	2.51e-230	CD4T_c08-GZMK	CD28
2.55e-233	0.520811	0.666	0.393	3.74e-229	CD4T_c08-GZMK	RBM8A
8.63e-231	0.622861	0.447	0.197	1.27e-226	CD4T_c08-GZMK	SLC38A2
1.23e-230	0.317768	0.148	0.029	1.81e-226	CD4T_c08-GZMK	F2R
1.59e-230	0.384449	0.214	0.056	2.34e-226	CD4T_c08-GZMK	PERP
1.66e-230	0.402922	0.236	0.067	2.44e-226	CD4T_c08-GZMK	GPR132
7.25e-230	0.557362	0.45	0.2	1.07e-225	CD4T_c08-GZMK	SMARCA5
2.92e-229	0.51092	0.525	0.257	4.29e-225	CD4T_c08-GZMK	MAPK1IP1L
5.36e-228	0.737862	0.678	0.432	7.88e-224	CD4T_c08-GZMK	NFKBIA
3.37e-226	0.444212	0.244	0.071	4.95e-222	CD4T_c08-GZMK	HGSNAT
5.54e-226	0.548783	0.634	0.367	8.14e-222	CD4T_c08-GZMK	GZMM
1.03e-225	0.419293	0.287	0.093	1.52e-221	CD4T_c08-GZMK	SEC23B
7.27e-225	0.53061	0.488	0.23	1.07e-220	CD4T_c08-GZMK	JPT1
1.35e-222	0.538594	0.458	0.209	1.99e-218	CD4T_c08-GZMK	MAT2A
3.02e-221	0.722492	0.364	0.143	4.44e-217	CD4T_c08-GZMK	TNFRSF4
3.62e-221	0.463163	0.333	0.121	5.32e-217	CD4T_c08-GZMK	MTHFD2
8.37e-220	0.498843	0.388	0.158	1.23e-215	CD4T_c08-GZMK	NUP98
7.84e-219	0.464213	0.332	0.122	1.15e-214	CD4T_c08-GZMK	PAF1
3.24e-218	0.475431	0.316	0.112	4.76e-214	CD4T_c08-GZMK	TGIF1
3.87e-218	0.574346	0.672	0.419	5.68e-214	CD4T_c08-GZMK	ELF1
3.06e-217	0.470452	0.277	0.09	4.49e-213	CD4T_c08-GZMK	MAF
5.73e-217	0.476221	0.297	0.102	8.42e-213	CD4T_c08-GZMK	RNF168
6.55e-217	0.527044	0.716	0.474	9.63e-213	CD4T_c08-GZMK	ATP6V0C
1.13e-216	0.551623	0.667	0.417	1.66e-212	CD4T_c08-GZMK	WIPF1
1.34e-213	0.451562	0.256	0.081	1.97e-209	CD4T_c08-GZMK	IL21R
1.79e-212	0.557083	0.864	0.717	2.63e-208	CD4T_c08-GZMK	TAGLN2
1.83e-212	0.564545	0.569	0.311	2.7e-208	CD4T_c08-GZMK	GPBP1
7.46e-212	0.328768	0.179	0.043	1.1e-207	CD4T_c08-GZMK	CYSTM1
1.18e-208	0.619371	0.476	0.232	1.74e-204	CD4T_c08-GZMK	RANBP2
2.84e-208	0.496848	0.443	0.203	4.18e-204	CD4T_c08-GZMK	AMD1
1.28e-207	0.515967	0.615	0.359	1.87e-203	CD4T_c08-GZMK	ARL6IP1
3.41e-207	0.46205	0.364	0.146	5.01e-203	CD4T_c08-GZMK	APMAP
1.25e-206	0.437988	0.274	0.091	1.83e-202	CD4T_c08-GZMK	DENND4A
3.26e-206	0.432754	0.308	0.11	4.8e-202	CD4T_c08-GZMK	SPPL2A
2.3e-204	0.288609	0.992	0.988	3.38e-200	CD4T_c08-GZMK	PTMA
3.14e-204	0.524677	0.671	0.424	4.61e-200	CD4T_c08-GZMK	EIF5
3.9e-204	0.514764	0.43	0.199	5.73e-200	CD4T_c08-GZMK	MOB4
1.53e-203	0.529117	0.739	0.515	2.25e-199	CD4T_c08-GZMK	KMT2E
1.97e-203	0.461642	0.421	0.187	2.9e-199	CD4T_c08-GZMK	ISCA1
2.28e-201	0.424511	0.29	0.099	3.35e-197	CD4T_c08-GZMK	HOPX
3.57e-200	0.448709	0.338	0.13	5.24e-196	CD4T_c08-GZMK	SOCS3
9.89e-200	0.407271	0.252	0.081	1.45e-195	CD4T_c08-GZMK	SPTY2D1
1.05e-199	0.274185	0.131	0.026	1.54e-195	CD4T_c08-GZMK	WDR47
6.24e-199	0.552603	0.391	0.169	9.17e-195	CD4T_c08-GZMK	ATP2B1
3.72e-197	0.556548	0.537	0.294	5.46e-193	CD4T_c08-GZMK	DDX21
4.04e-197	0.568263	0.549	0.301	5.94e-193	CD4T_c08-GZMK	CD96
3.91e-195	0.520697	0.722	0.449	5.75e-191	CD4T_c08-GZMK	AHNAK
1.15e-194	0.501033	0.706	0.473	1.68e-190	CD4T_c08-GZMK	CD53
1.86e-194	0.514532	0.488	0.244	2.74e-190	CD4T_c08-GZMK	PARP8
6.63e-193	0.415126	0.87	0.672	9.74e-189	CD4T_c08-GZMK	CD99
1.61e-192	0.442932	0.204	0.058	2.37e-188	CD4T_c08-GZMK	NEU1
5.98e-192	0.520635	0.395	0.174	8.8e-188	CD4T_c08-GZMK	CRYBG1
2.04e-190	0.307358	0.976	0.96	2.99e-186	CD4T_c08-GZMK	ARHGDIB
8.77e-189	0.499077	0.424	0.196	1.29e-184	CD4T_c08-GZMK	GPRIN3
1.97e-188	0.287282	0.114	0.021	2.89e-184	CD4T_c08-GZMK	AC020916.1
1.72e-187	0.566243	0.719	0.513	2.52e-183	CD4T_c08-GZMK	HIST1H4C
2.7e-187	0.438687	0.822	0.632	3.97e-183	CD4T_c08-GZMK	TMBIM6
1.5e-185	0.519148	0.604	0.364	2.2e-181	CD4T_c08-GZMK	HNRNPUL1
2.22e-185	0.508963	0.806	0.582	3.26e-181	CD4T_c08-GZMK	S100A11
3.14e-184	0.53373	0.683	0.455	4.62e-180	CD4T_c08-GZMK	ITM2A
2.05e-183	0.452911	0.333	0.134	3.02e-179	CD4T_c08-GZMK	EVI2A
2.07e-183	0.523833	0.657	0.428	3.05e-179	CD4T_c08-GZMK	MSN
3.68e-182	0.326307	0.179	0.048	5.41e-178	CD4T_c08-GZMK	TBX21
1.27e-181	0.469752	0.764	0.575	1.87e-177	CD4T_c08-GZMK	PGK1
2.13e-181	0.45745	0.346	0.143	3.13e-177	CD4T_c08-GZMK	ALG13
2.96e-181	0.408739	0.776	0.541	4.35e-177	CD4T_c08-GZMK	CLIC1
1.12e-180	0.477727	0.435	0.208	1.64e-176	CD4T_c08-GZMK	TOP1
1.18e-180	0.453757	0.848	0.691	1.73e-176	CD4T_c08-GZMK	LEPROTL1
1.99e-180	0.263835	0.133	0.029	2.93e-176	CD4T_c08-GZMK	PLCB1
4.88e-179	0.445186	0.276	0.102	7.17e-175	CD4T_c08-GZMK	TUBA1C
1.04e-177	0.391809	0.172	0.047	1.53e-173	CD4T_c08-GZMK	PPIF
1.48e-176	0.409054	0.149	0.036	2.17e-172	CD4T_c08-GZMK	MIR155HG
2.07e-176	0.484419	0.351	0.149	3.05e-172	CD4T_c08-GZMK	HNRNPLL
8.78e-176	0.26996	0.116	0.023	1.29e-171	CD4T_c08-GZMK	GADD45G
1.58e-175	0.543423	0.584	0.347	2.33e-171	CD4T_c08-GZMK	TXN
1.5e-174	0.390801	0.22	0.07	2.2e-170	CD4T_c08-GZMK	RAB11FIP1
2.77e-173	0.491068	0.435	0.213	4.07e-169	CD4T_c08-GZMK	ARID5A
5.49e-173	0.474526	0.413	0.197	8.07e-169	CD4T_c08-GZMK	NFATC2
3.72e-172	0.463136	0.416	0.201	5.47e-168	CD4T_c08-GZMK	SURF4
2.86e-171	0.502098	0.649	0.422	4.2e-167	CD4T_c08-GZMK	CDC42SE2
2.93e-171	0.321344	0.986	0.967	4.31e-167	CD4T_c08-GZMK	SARAF
3.84e-171	0.448981	0.336	0.141	5.65e-167	CD4T_c08-GZMK	ATP2B4
2.01e-170	0.407994	0.831	0.699	2.96e-166	CD4T_c08-GZMK	SUB1
2.66e-170	0.357652	0.249	0.086	3.9e-166	CD4T_c08-GZMK	DCTN6
8.04e-170	0.458138	0.483	0.243	1.18e-165	CD4T_c08-GZMK	HLA-DPB1
1.01e-169	0.506656	0.337	0.145	1.48e-165	CD4T_c08-GZMK	DDX3Y
3.21e-169	0.308134	0.202	0.061	4.72e-165	CD4T_c08-GZMK	RHOC
4.92e-169	0.444989	0.506	0.262	7.23e-165	CD4T_c08-GZMK	ANXA2
7.2e-169	0.43449	0.511	0.275	1.06e-164	CD4T_c08-GZMK	CTSC
1.44e-168	0.390768	0.274	0.103	2.11e-164	CD4T_c08-GZMK	OAT
1.89e-168	0.576947	0.672	0.466	2.77e-164	CD4T_c08-GZMK	EIF4G2
1.37e-167	0.529547	0.577	0.345	2.01e-163	CD4T_c08-GZMK	SLC38A1
2.19e-167	0.427145	0.787	0.601	3.21e-163	CD4T_c08-GZMK	ITGB2
5.44e-167	0.366394	0.201	0.062	7.99e-163	CD4T_c08-GZMK	LRIG1
1.99e-166	0.402352	0.328	0.136	2.92e-162	CD4T_c08-GZMK	TM2D3
1.99e-166	0.443052	0.413	0.199	2.92e-162	CD4T_c08-GZMK	DNTTIP2
3.66e-165	0.323399	0.185	0.054	5.38e-161	CD4T_c08-GZMK	HSPA13
1.46e-164	0.494876	0.517	0.288	2.15e-160	CD4T_c08-GZMK	EMB
1.2e-163	0.42245	0.35	0.154	1.77e-159	CD4T_c08-GZMK	SELENOS
2.85e-163	0.347663	0.206	0.066	4.18e-159	CD4T_c08-GZMK	H2AFX
1.01e-162	0.308583	0.227	0.075	1.48e-158	CD4T_c08-GZMK	TNFRSF18
6.11e-162	0.52763	0.637	0.432	8.98e-158	CD4T_c08-GZMK	CD5
5.22e-161	0.545575	0.699	0.521	7.68e-157	CD4T_c08-GZMK	ISG20
3.78e-160	0.462493	0.557	0.327	5.56e-156	CD4T_c08-GZMK	DYNLL1
5.9e-160	0.607609	0.283	0.113	8.68e-156	CD4T_c08-GZMK	CCR6
7.23e-159	0.255179	0.114	0.024	1.06e-154	CD4T_c08-GZMK	NBL1
4.16e-157	0.55694	0.459	0.239	6.11e-153	CD4T_c08-GZMK	GBP5
4.38e-157	0.388047	0.89	0.782	6.43e-153	CD4T_c08-GZMK	YWHAB
5.2e-157	0.431831	0.668	0.462	7.64e-153	CD4T_c08-GZMK	POLR2L
7.49e-156	0.463	0.607	0.383	1.1e-151	CD4T_c08-GZMK	ARID4B
7.66e-156	0.489606	0.376	0.178	1.13e-151	CD4T_c08-GZMK	SLA
9.12e-156	0.427865	0.68	0.465	1.34e-151	CD4T_c08-GZMK	UBE2B
1.17e-155	0.49003	0.356	0.166	1.72e-151	CD4T_c08-GZMK	NINJ1
4.69e-155	0.43143	0.46	0.243	6.89e-151	CD4T_c08-GZMK	REEP5
6.39e-155	0.424752	0.82	0.669	9.39e-151	CD4T_c08-GZMK	NCL
1.56e-154	0.355719	0.166	0.048	2.29e-150	CD4T_c08-GZMK	ADAM19
2.11e-154	0.638052	0.613	0.403	3.1e-150	CD4T_c08-GZMK	SAT1
2.55e-154	0.434071	0.267	0.105	3.75e-150	CD4T_c08-GZMK	GYG1
3.12e-154	0.304193	0.132	0.032	4.58e-150	CD4T_c08-GZMK	IL18R1
6.13e-154	0.442188	0.39	0.186	9.01e-150	CD4T_c08-GZMK	CTSW
1.08e-153	0.436927	0.642	0.422	1.58e-149	CD4T_c08-GZMK	TMEM50A
9.09e-153	0.318325	0.141	0.036	1.34e-148	CD4T_c08-GZMK	LAG3
1.06e-152	0.457753	0.454	0.242	1.56e-148	CD4T_c08-GZMK	SLC3A2
1.18e-152	0.449262	0.314	0.134	1.73e-148	CD4T_c08-GZMK	FAS
5.59e-152	0.424651	0.378	0.179	8.22e-148	CD4T_c08-GZMK	ZFAND5
5.83e-152	0.465143	0.425	0.22	8.57e-148	CD4T_c08-GZMK	SLBP
1.81e-151	0.441907	0.731	0.539	2.65e-147	CD4T_c08-GZMK	PSME2
1.97e-151	0.395	0.252	0.095	2.9e-147	CD4T_c08-GZMK	SLC39A8
2.91e-151	0.328713	0.182	0.055	4.28e-147	CD4T_c08-GZMK	GADD45A
4.29e-151	0.455884	0.574	0.36	6.31e-147	CD4T_c08-GZMK	MAP1LC3B
5.1e-151	0.482955	0.672	0.463	7.5e-147	CD4T_c08-GZMK	STK17B
5.16e-151	0.251682	0.139	0.035	7.58e-147	CD4T_c08-GZMK	MAP1LC3A
6.57e-151	0.261883	0.146	0.038	9.66e-147	CD4T_c08-GZMK	RBKS
1.29e-150	0.258202	0.108	0.023	1.89e-146	CD4T_c08-GZMK	BIK
1.9e-150	0.358952	0.238	0.086	2.79e-146	CD4T_c08-GZMK	CD58
4.45e-150	0.329025	0.162	0.047	6.54e-146	CD4T_c08-GZMK	TSC22D2
5.52e-150	0.451606	0.318	0.14	8.12e-146	CD4T_c08-GZMK	CTR9
1.64e-149	0.390124	0.286	0.117	2.42e-145	CD4T_c08-GZMK	PLEKHB2
3.54e-149	0.487486	0.477	0.263	5.2e-145	CD4T_c08-GZMK	IQGAP1
4e-149	0.455582	0.447	0.239	5.88e-145	CD4T_c08-GZMK	NSMCE3
5.12e-149	0.438571	0.682	0.484	7.53e-145	CD4T_c08-GZMK	CDC37
2.16e-147	0.494244	0.44	0.233	3.18e-143	CD4T_c08-GZMK	CCND2
6.77e-147	0.444841	0.293	0.125	9.95e-143	CD4T_c08-GZMK	RAB9A
3.85e-146	0.376836	0.837	0.698	5.65e-142	CD4T_c08-GZMK	PPIB
9.29e-146	0.324362	0.217	0.076	1.36e-141	CD4T_c08-GZMK	NANS
2.66e-145	0.676334	0.659	0.469	3.91e-141	CD4T_c08-GZMK	KLF6
3.38e-145	0.434168	0.399	0.199	4.96e-141	CD4T_c08-GZMK	COPB1
1.07e-142	0.28723	0.947	0.78	1.57e-138	CD4T_c08-GZMK	S100A4
2.95e-142	0.560936	0.704	0.567	4.33e-138	CD4T_c08-GZMK	LITAF
3.27e-142	0.507132	0.79	0.656	4.81e-138	CD4T_c08-GZMK	CD44
1.38e-141	0.413845	0.558	0.34	2.03e-137	CD4T_c08-GZMK	CAPZA1
3.48e-141	0.314127	0.183	0.059	5.11e-137	CD4T_c08-GZMK	RCOR1
8.87e-141	0.506731	0.308	0.138	1.3e-136	CD4T_c08-GZMK	SERPINB9
1.13e-140	0.47832	0.505	0.293	1.66e-136	CD4T_c08-GZMK	ARID5B
2e-140	0.660674	0.251	0.103	2.94e-136	CD4T_c08-GZMK	BCL2A1
1.26e-139	0.316774	0.176	0.055	1.85e-135	CD4T_c08-GZMK	SYTL2
1.16e-138	0.605396	0.522	0.334	1.7e-134	CD4T_c08-GZMK	CLEC2B
2.66e-138	0.404565	0.28	0.117	3.91e-134	CD4T_c08-GZMK	TRAF1
8.13e-138	0.262764	0.116	0.028	1.2e-133	CD4T_c08-GZMK	DSE
2.36e-136	0.424003	0.325	0.15	3.46e-132	CD4T_c08-GZMK	APOBEC3G
1.21e-135	0.288329	0.186	0.061	1.78e-131	CD4T_c08-GZMK	CDC34
2.72e-134	0.405519	0.674	0.486	4e-130	CD4T_c08-GZMK	SEC61B
3.17e-134	0.347649	0.217	0.08	4.66e-130	CD4T_c08-GZMK	GCH1
5.9e-134	0.417486	0.357	0.174	8.68e-130	CD4T_c08-GZMK	POLR2A
7.28e-134	0.334363	0.864	0.761	1.07e-129	CD4T_c08-GZMK	SKP1
1.45e-133	0.279513	0.166	0.052	2.13e-129	CD4T_c08-GZMK	CPD
2.41e-133	0.310053	0.178	0.058	3.54e-129	CD4T_c08-GZMK	UAP1
6.03e-132	0.357306	0.211	0.077	8.86e-128	CD4T_c08-GZMK	KCTD20
1.39e-131	0.320327	0.194	0.067	2.04e-127	CD4T_c08-GZMK	NEDD9
3.18e-131	0.316595	0.2	0.069	4.67e-127	CD4T_c08-GZMK	HLA-DRB5
2.63e-130	0.518124	0.545	0.348	3.87e-126	CD4T_c08-GZMK	TUBA1A
2.86e-130	0.378672	0.174	0.057	4.21e-126	CD4T_c08-GZMK	HLA-DQB1
5.47e-130	0.413776	0.436	0.239	8.03e-126	CD4T_c08-GZMK	PPP2CA
1.66e-128	0.403091	0.512	0.307	2.44e-124	CD4T_c08-GZMK	RPN1
3.3e-128	0.326244	0.282	0.119	4.85e-124	CD4T_c08-GZMK	PRF1
4.77e-128	0.329222	0.871	0.77	7.01e-124	CD4T_c08-GZMK	MYL12B
5.7e-128	0.387001	0.356	0.176	8.38e-124	CD4T_c08-GZMK	HNRNPAB
2.03e-127	0.336082	0.217	0.082	2.99e-123	CD4T_c08-GZMK	GFPT1
1.16e-126	0.300714	0.179	0.06	1.7e-122	CD4T_c08-GZMK	LMNB1
1.28e-126	0.370527	0.285	0.127	1.88e-122	CD4T_c08-GZMK	MAP2K3
7.49e-126	0.645543	0.47	0.292	1.1e-121	CD4T_c08-GZMK	SATB1
3.36e-125	0.361967	0.251	0.103	4.93e-121	CD4T_c08-GZMK	ARL4A
6.69e-125	0.433133	0.475	0.282	9.84e-121	CD4T_c08-GZMK	ORAI1
1.28e-124	0.413329	0.406	0.219	1.87e-120	CD4T_c08-GZMK	DHX36
1.84e-124	0.392344	0.512	0.305	2.7e-120	CD4T_c08-GZMK	SERINC1
2.62e-124	0.287842	0.153	0.047	3.84e-120	CD4T_c08-GZMK	TNF
4.12e-124	0.271854	0.146	0.044	6.06e-120	CD4T_c08-GZMK	KIF21A
6.02e-124	0.274517	0.154	0.048	8.85e-120	CD4T_c08-GZMK	CYP51A1
6.46e-124	0.401867	0.381	0.198	9.5e-120	CD4T_c08-GZMK	ADSS
1.03e-123	0.381714	0.256	0.107	1.51e-119	CD4T_c08-GZMK	BRAF
1.32e-123	0.349244	0.804	0.669	1.94e-119	CD4T_c08-GZMK	SLC25A3
4.49e-123	0.391035	0.4	0.213	6.6e-119	CD4T_c08-GZMK	SPCS3
1.07e-122	0.399325	0.338	0.165	1.58e-118	CD4T_c08-GZMK	TMF1
2.44e-122	0.416264	0.402	0.216	3.59e-118	CD4T_c08-GZMK	DIAPH1
4.74e-122	0.395971	0.635	0.44	6.97e-118	CD4T_c08-GZMK	PRDX1
1.28e-121	0.416654	0.576	0.383	1.89e-117	CD4T_c08-GZMK	ARF6
4.43e-121	0.347718	0.297	0.135	6.51e-117	CD4T_c08-GZMK	DNAJC1
7.54e-121	0.575762	0.392	0.214	1.11e-116	CD4T_c08-GZMK	MT1X
1.08e-120	0.297274	0.173	0.059	1.58e-116	CD4T_c08-GZMK	RELL1
9.77e-120	0.50018	0.464	0.28	1.44e-115	CD4T_c08-GZMK	BAZ1A
1e-119	0.375089	0.38	0.197	1.47e-115	CD4T_c08-GZMK	RABGAP1L
1.04e-119	0.390685	0.421	0.235	1.53e-115	CD4T_c08-GZMK	VDAC1
3.22e-119	0.4157	0.411	0.227	4.73e-115	CD4T_c08-GZMK	CKLF
4.18e-119	0.323686	0.219	0.085	6.14e-115	CD4T_c08-GZMK	DUSP16
2.66e-118	0.385973	0.358	0.182	3.91e-114	CD4T_c08-GZMK	MECP2
3.8e-118	0.37578	0.213	0.083	5.58e-114	CD4T_c08-GZMK	GPR171
6.44e-118	0.407969	0.621	0.429	9.46e-114	CD4T_c08-GZMK	IL2RG
9.07e-117	0.376315	0.699	0.542	1.33e-112	CD4T_c08-GZMK	ATP5F1B
1.7e-116	0.361004	0.438	0.248	2.5e-112	CD4T_c08-GZMK	SDF4
5.42e-116	0.378344	0.289	0.134	7.97e-112	CD4T_c08-GZMK	PRKX
1.42e-115	0.311198	0.261	0.112	2.09e-111	CD4T_c08-GZMK	SAR1B
3.48e-115	0.362528	0.357	0.182	5.12e-111	CD4T_c08-GZMK	HBP1
1.32e-114	0.422113	0.624	0.433	1.94e-110	CD4T_c08-GZMK	RNF213
1.61e-114	0.360359	0.28	0.127	2.36e-110	CD4T_c08-GZMK	GNA13
2.28e-114	0.29054	0.189	0.07	3.35e-110	CD4T_c08-GZMK	CASP3
3.5e-114	0.502503	0.534	0.343	5.14e-110	CD4T_c08-GZMK	STAT1
4.97e-114	0.34362	0.806	0.66	7.3e-110	CD4T_c08-GZMK	HCST
9.69e-114	0.272693	0.174	0.061	1.42e-109	CD4T_c08-GZMK	RASSF2
3.17e-113	0.408908	0.725	0.604	4.66e-109	CD4T_c08-GZMK	NDUFS5
3.31e-113	0.376896	0.502	0.315	4.86e-109	CD4T_c08-GZMK	MAGOH
4.28e-113	0.365316	0.482	0.289	6.29e-109	CD4T_c08-GZMK	SELENOT
1.61e-112	0.313401	0.229	0.094	2.37e-108	CD4T_c08-GZMK	BTG3
4.13e-112	0.435443	0.603	0.422	6.07e-108	CD4T_c08-GZMK	SMAP2
7.39e-112	0.41857	0.557	0.371	1.09e-107	CD4T_c08-GZMK	CLEC2D
1.22e-111	0.400402	0.289	0.136	1.8e-107	CD4T_c08-GZMK	TSPYL2
1.85e-111	0.388607	0.432	0.246	2.71e-107	CD4T_c08-GZMK	ANXA5
7.99e-111	0.421949	0.617	0.432	1.17e-106	CD4T_c08-GZMK	CDKN1B
1.09e-110	0.387375	0.414	0.236	1.59e-106	CD4T_c08-GZMK	SERINC3
2e-110	0.383413	0.403	0.228	2.95e-106	CD4T_c08-GZMK	AKIRIN1
7.51e-110	0.473087	0.275	0.127	1.1e-105	CD4T_c08-GZMK	PDE4D
9.55e-110	0.339982	0.911	0.865	1.4e-105	CD4T_c08-GZMK	DDX5
1.81e-109	0.300146	0.248	0.107	2.66e-105	CD4T_c08-GZMK	SAR1A
3.56e-109	0.337051	0.302	0.145	5.23e-105	CD4T_c08-GZMK	DERL1
4.26e-108	0.34887	0.297	0.142	6.27e-104	CD4T_c08-GZMK	TACC1
7.21e-108	0.363307	0.505	0.315	1.06e-103	CD4T_c08-GZMK	OPTN
2.32e-107	0.416968	0.637	0.461	3.42e-103	CD4T_c08-GZMK	IER2
6.3e-107	0.302423	0.17	0.061	9.26e-103	CD4T_c08-GZMK	TLE3
7.01e-107	0.383444	0.381	0.207	1.03e-102	CD4T_c08-GZMK	CEBPZ
1.41e-105	0.261346	0.194	0.075	2.07e-101	CD4T_c08-GZMK	TFIP11
2.95e-105	0.359763	0.433	0.253	4.33e-101	CD4T_c08-GZMK	PDIA6
3.03e-105	0.264564	0.158	0.054	4.45e-101	CD4T_c08-GZMK	ZHX2
1.23e-104	0.358035	0.266	0.122	1.8e-100	CD4T_c08-GZMK	BORCS5
3.24e-104	0.339084	0.713	0.552	4.76e-100	CD4T_c08-GZMK	ARF1
1.11e-103	0.326596	0.271	0.126	1.64e-99	CD4T_c08-GZMK	NDEL1
1.13e-103	0.401496	0.309	0.156	1.66e-99	CD4T_c08-GZMK	PNP
1.22e-103	0.429751	0.505	0.32	1.8e-99	CD4T_c08-GZMK	SYNE2
3.44e-103	0.275234	0.162	0.057	5.06e-99	CD4T_c08-GZMK	N4BP1
3.63e-103	0.389945	0.378	0.211	5.34e-99	CD4T_c08-GZMK	RILPL2
5.23e-103	0.310875	0.134	0.043	7.69e-99	CD4T_c08-GZMK	FGL2
6.35e-103	0.348308	0.348	0.184	9.33e-99	CD4T_c08-GZMK	NASP
3.41e-102	0.261009	0.203	0.082	5.01e-98	CD4T_c08-GZMK	RAB35
3.85e-102	0.340066	0.22	0.093	5.67e-98	CD4T_c08-GZMK	TWISTNB
4.73e-102	0.3535	0.651	0.484	6.95e-98	CD4T_c08-GZMK	HLA-F
5.79e-102	0.325432	0.258	0.118	8.5e-98	CD4T_c08-GZMK	PRKAR2A
1.08e-101	0.388213	0.411	0.237	1.59e-97	CD4T_c08-GZMK	LAPTM4A
3.16e-101	0.376953	0.407	0.235	4.64e-97	CD4T_c08-GZMK	EIF4A1
3.47e-101	0.271728	0.193	0.076	5.1e-97	CD4T_c08-GZMK	NCOA2
1.11e-100	0.277135	0.16	0.057	1.64e-96	CD4T_c08-GZMK	SIK3
4.87e-100	0.320801	0.342	0.18	7.16e-96	CD4T_c08-GZMK	EMC7
6.83e-100	0.341137	0.507	0.327	1e-95	CD4T_c08-GZMK	STRAP
2.25e-99	0.381046	0.384	0.218	3.3e-95	CD4T_c08-GZMK	POLR2K
3.13e-99	0.300053	0.186	0.073	4.6e-95	CD4T_c08-GZMK	LPAR2
2.31e-98	0.354807	0.46	0.283	3.39e-94	CD4T_c08-GZMK	G3BP1
2.93e-98	0.32439	0.299	0.149	4.31e-94	CD4T_c08-GZMK	RNF139
5.42e-98	0.346441	0.856	0.757	7.96e-94	CD4T_c08-GZMK	S100A10
5.97e-98	0.33412	0.231	0.101	8.77e-94	CD4T_c08-GZMK	FAM129A
1.36e-97	0.375843	0.609	0.436	2e-93	CD4T_c08-GZMK	STK17A
1.43e-97	0.344955	0.34	0.181	2.11e-93	CD4T_c08-GZMK	PPP4R3A
2.22e-97	0.297547	0.239	0.107	3.26e-93	CD4T_c08-GZMK	CCDC47
6.24e-97	0.386019	0.579	0.404	9.17e-93	CD4T_c08-GZMK	PBXIP1
1.19e-96	0.338454	0.571	0.392	1.75e-92	CD4T_c08-GZMK	H2AFV
1.31e-96	0.311946	0.239	0.107	1.92e-92	CD4T_c08-GZMK	SACM1L
2.25e-96	0.274369	0.169	0.064	3.3e-92	CD4T_c08-GZMK	MCM6
5.82e-96	0.260995	0.14	0.047	8.55e-92	CD4T_c08-GZMK	GPR18
2.2e-95	0.270896	0.234	0.104	3.23e-91	CD4T_c08-GZMK	UBE2D1
7.01e-95	0.256623	0.16	0.059	1.03e-90	CD4T_c08-GZMK	ANTXR2
8.05e-95	0.348589	0.589	0.42	1.18e-90	CD4T_c08-GZMK	SNRPG
1.12e-94	0.295924	0.182	0.072	1.65e-90	CD4T_c08-GZMK	GGA2
1.8e-94	0.377508	0.535	0.361	2.65e-90	CD4T_c08-GZMK	FNBP1
2.66e-94	0.323094	0.289	0.143	3.92e-90	CD4T_c08-GZMK	EPSTI1
2.99e-94	0.374568	0.481	0.314	4.39e-90	CD4T_c08-GZMK	POMP
3.05e-94	0.302771	0.294	0.148	4.48e-90	CD4T_c08-GZMK	ATP6V0D1
3.09e-94	0.417806	0.388	0.227	4.55e-90	CD4T_c08-GZMK	ISG15
6.75e-94	0.283895	0.21	0.089	9.92e-90	CD4T_c08-GZMK	PRMT9
6.87e-94	0.328666	0.207	0.088	1.01e-89	CD4T_c08-GZMK	MTMR6
6.93e-94	0.25918	0.186	0.074	1.02e-89	CD4T_c08-GZMK	NABP1
1.71e-93	0.379035	0.657	0.487	2.52e-89	CD4T_c08-GZMK	HSP90B1
1.86e-93	0.274716	0.169	0.065	2.73e-89	CD4T_c08-GZMK	PRR7
2.74e-93	0.382206	0.316	0.166	4.03e-89	CD4T_c08-GZMK	ERN1
1.74e-92	0.326481	0.341	0.186	2.56e-88	CD4T_c08-GZMK	RELA
2.59e-92	0.316473	0.262	0.126	3.81e-88	CD4T_c08-GZMK	DNAJC3
4.61e-92	0.334891	0.446	0.273	6.78e-88	CD4T_c08-GZMK	NAPA
4.72e-92	0.364646	0.904	0.859	6.93e-88	CD4T_c08-GZMK	IL7R
1.91e-91	0.255311	0.864	0.774	2.81e-87	CD4T_c08-GZMK	ARPC2
2.62e-91	0.322194	0.319	0.168	3.86e-87	CD4T_c08-GZMK	SIAH2
3.03e-91	0.257764	0.191	0.079	4.45e-87	CD4T_c08-GZMK	MGAT2
3.21e-91	0.37708	0.539	0.365	4.72e-87	CD4T_c08-GZMK	CAST
4.21e-91	0.250579	0.135	0.046	6.18e-87	CD4T_c08-GZMK	KLF10
4.97e-91	0.351468	0.545	0.371	7.31e-87	CD4T_c08-GZMK	YWHAQ
8.4e-91	0.27881	0.232	0.105	1.24e-86	CD4T_c08-GZMK	CWC25
2.2e-90	0.368921	0.588	0.425	3.23e-86	CD4T_c08-GZMK	SRSF3
2.45e-90	0.352398	0.271	0.135	3.6e-86	CD4T_c08-GZMK	RFTN1
3.46e-90	0.57125	0.93	0.909	5.08e-86	CD4T_c08-GZMK	VIM
3.49e-90	0.298549	0.241	0.111	5.13e-86	CD4T_c08-GZMK	MAP3K2
6.12e-90	0.271613	0.16	0.061	9e-86	CD4T_c08-GZMK	OTULIN
1.14e-89	0.331781	0.425	0.256	1.68e-85	CD4T_c08-GZMK	SSR3
1.24e-89	0.261714	0.164	0.063	1.82e-85	CD4T_c08-GZMK	MPZL3
1.3e-89	0.33033	0.238	0.111	1.91e-85	CD4T_c08-GZMK	HCG18
1.63e-89	0.320353	0.214	0.094	2.39e-85	CD4T_c08-GZMK	MYBL1
1.69e-89	0.38237	0.303	0.16	2.48e-85	CD4T_c08-GZMK	SRRT
3.47e-89	0.366289	0.65	0.489	5.09e-85	CD4T_c08-GZMK	LRRFIP1
9.89e-89	0.36759	0.447	0.279	1.45e-84	CD4T_c08-GZMK	CANX
1.36e-88	0.339423	0.423	0.259	2e-84	CD4T_c08-GZMK	LPXN
6.23e-88	0.385949	0.676	0.528	9.16e-84	CD4T_c08-GZMK	HNRNPU
6.81e-88	0.327111	0.267	0.132	1e-83	CD4T_c08-GZMK	ABCF1
7.84e-88	0.33188	0.289	0.149	1.15e-83	CD4T_c08-GZMK	TSEN54
9.26e-88	0.277412	0.223	0.101	1.36e-83	CD4T_c08-GZMK	PPIL4
1.45e-87	0.357974	0.252	0.122	2.13e-83	CD4T_c08-GZMK	GOLGB1
2.78e-87	0.340515	0.309	0.165	4.08e-83	CD4T_c08-GZMK	STARD7
1.67e-86	0.278662	0.192	0.081	2.45e-82	CD4T_c08-GZMK	LYST
5.25e-86	0.388734	0.376	0.223	7.71e-82	CD4T_c08-GZMK	ODC1
6.04e-86	0.352918	0.487	0.321	8.88e-82	CD4T_c08-GZMK	NOP58
6.39e-86	0.451756	0.485	0.325	9.39e-82	CD4T_c08-GZMK	CD55
8.2e-86	0.381613	0.557	0.397	1.2e-81	CD4T_c08-GZMK	XBP1
2.45e-85	0.377546	0.409	0.252	3.59e-81	CD4T_c08-GZMK	AKNA
3.07e-85	0.276517	0.268	0.132	4.51e-81	CD4T_c08-GZMK	OSER1
4.45e-85	0.354289	0.476	0.31	6.54e-81	CD4T_c08-GZMK	WSB1
7.75e-85	0.335251	0.347	0.197	1.14e-80	CD4T_c08-GZMK	PAFAH1B1
2.83e-84	0.370074	0.471	0.309	4.16e-80	CD4T_c08-GZMK	TAP1
3.85e-84	0.34977	0.392	0.236	5.66e-80	CD4T_c08-GZMK	PRKAR1A
4.49e-84	0.294925	0.215	0.098	6.59e-80	CD4T_c08-GZMK	ITM2C
9.04e-84	0.311316	0.672	0.526	1.33e-79	CD4T_c08-GZMK	GUK1
5.14e-83	0.295059	0.242	0.117	7.56e-79	CD4T_c08-GZMK	TM9SF3
9.58e-83	0.291329	0.278	0.143	1.41e-78	CD4T_c08-GZMK	MANF
1.23e-82	0.347633	0.542	0.384	1.81e-78	CD4T_c08-GZMK	TERF2IP
1.26e-82	0.288731	0.323	0.177	1.86e-78	CD4T_c08-GZMK	STAU1
1.39e-82	0.312385	0.731	0.6	2.04e-78	CD4T_c08-GZMK	FUS
1.39e-82	0.303727	0.252	0.125	2.05e-78	CD4T_c08-GZMK	RIC8A
4.47e-82	0.258518	0.172	0.071	6.58e-78	CD4T_c08-GZMK	JMY
1.25e-81	0.254955	0.181	0.076	1.83e-77	CD4T_c08-GZMK	TGIF2
2.29e-81	0.29736	0.228	0.108	3.36e-77	CD4T_c08-GZMK	TMEM43
4.03e-81	0.339003	0.577	0.427	5.93e-77	CD4T_c08-GZMK	RHOG
5.72e-81	0.31341	0.472	0.311	8.41e-77	CD4T_c08-GZMK	ILF2
1.47e-80	0.382432	0.628	0.495	2.16e-76	CD4T_c08-GZMK	RHOH
2.1e-80	0.274457	0.196	0.087	3.09e-76	CD4T_c08-GZMK	MSL2
2.69e-80	0.283453	0.277	0.143	3.96e-76	CD4T_c08-GZMK	MAPK1
5.48e-80	0.309601	0.281	0.148	8.05e-76	CD4T_c08-GZMK	SRP54
1.65e-79	0.393814	0.378	0.232	2.42e-75	CD4T_c08-GZMK	SOD2
1.9e-79	0.332114	0.467	0.303	2.8e-75	CD4T_c08-GZMK	SRPRA
2.14e-79	0.258445	0.21	0.097	3.15e-75	CD4T_c08-GZMK	ADAM8
2.22e-79	0.279566	0.17	0.071	3.26e-75	CD4T_c08-GZMK	ELMSAN1
2.8e-79	0.27393	0.162	0.066	4.11e-75	CD4T_c08-GZMK	PDP1
4.52e-79	0.27133	0.279	0.144	6.64e-75	CD4T_c08-GZMK	ARPP19
1.25e-78	0.289929	0.701	0.559	1.84e-74	CD4T_c08-GZMK	PSMA7
2.28e-78	0.323791	0.336	0.19	3.36e-74	CD4T_c08-GZMK	TMX4
2.88e-78	0.250175	0.191	0.085	4.23e-74	CD4T_c08-GZMK	ZNF410
4.75e-78	0.353146	0.68	0.559	6.97e-74	CD4T_c08-GZMK	CYTIP
6.68e-78	0.368886	0.555	0.41	9.82e-74	CD4T_c08-GZMK	ARL4C
9.27e-78	0.258161	0.215	0.1	1.36e-73	CD4T_c08-GZMK	AGO2
1.41e-77	0.269724	0.242	0.119	2.07e-73	CD4T_c08-GZMK	ISG20L2
1.52e-77	0.255395	0.221	0.104	2.24e-73	CD4T_c08-GZMK	SLC25A32
2.83e-77	0.295201	0.55	0.385	4.15e-73	CD4T_c08-GZMK	SNRPB
4.4e-77	0.279385	0.278	0.146	6.46e-73	CD4T_c08-GZMK	EIF3J
7.05e-77	0.344951	0.754	0.653	1.04e-72	CD4T_c08-GZMK	RARRES3
1.29e-76	0.308433	0.371	0.221	1.89e-72	CD4T_c08-GZMK	CLK1
1.31e-76	0.281333	0.251	0.126	1.93e-72	CD4T_c08-GZMK	CLTC
1.39e-76	0.25114	0.864	0.806	2.05e-72	CD4T_c08-GZMK	PSME1
1.4e-76	0.303103	0.241	0.12	2.06e-72	CD4T_c08-GZMK	DPP4
7.45e-76	0.26095	0.258	0.132	1.09e-71	CD4T_c08-GZMK	RAB22A
[truncated: 1,909 more rows]

## Sheet: Myeloid
p_val	avg_logFC	pct.1	pct.2	p_val_adj	cluster	gene
0	2.14265	0.87	0.027	0	cDC1	DNASE1L3
0	1.94906	0.953	0.054	0	cDC1	C1orf54
0	1.83693	0.946	0.004	0	cDC1	CLEC9A
0	1.76849	0.856	0.062	0	cDC1	RGCC
0	1.71582	0.809	0.008	0	cDC1	IDO1
0	1.70599	0.726	0.076	0	cDC1	LMNA
0	1.4267	0.903	0.111	0	cDC1	WDFY4
0	1.27157	0.692	0.012	0	cDC1	RAB7B
0	1.2393	0.525	0.002	0	cDC1	TACSTD2
0	1.22765	0.428	0.011	0	cDC1	S100B
0	1.13627	0.773	0.002	0	cDC1	CADM1
0	1.05538	0.759	0.078	0	cDC1	SLAMF7
0	0.982526	0.535	0.047	0	cDC1	CST7
0	0.945184	0.642	0.024	0	cDC1	NET1
0	0.935828	0.722	0.056	0	cDC1	LGMN
0	0.896108	0.686	0.002	0	cDC1	CLNK
0	0.862575	0.732	0.062	0	cDC1	FLT3
0	0.852771	0.645	0.05	0	cDC1	RUBCNL
0	0.828617	0.706	0.008	0	cDC1	TMEM14A
0	0.794882	0.548	0.004	0	cDC1	CCND1
0	0.767431	0.522	0	0	cDC1	XCR1
0	0.76735	0.666	0.016	0	cDC1	HLA-DOB
0	0.713313	0.378	0.013	0	cDC1	DUSP4
0	0.67937	0.612	0.027	0	cDC1	SLAMF8
0	0.650591	0.535	0.019	0	cDC1	ASB2
0	0.646058	0.632	0.046	0	cDC1	NDRG2
0	0.624947	0.645	0.049	0	cDC1	CD59
0	0.614286	0.421	0.022	0	cDC1	GPR157
0	0.592352	0.609	0.046	0	cDC1	CLIC2
0	0.548788	0.582	0.054	0	cDC1	ADAM28
0	0.526585	0.455	0.006	0	cDC1	DBN1
0	0.51336	0.485	0.026	0	cDC1	P2RY14
0	0.50438	0.211	0.005	0	cDC1	RFPL4A
0	0.50212	0.495	0.008	0	cDC1	C1orf21
0	0.488124	0.458	0.004	0	cDC1	GCSAM
0	0.479935	0.452	0.019	0	cDC1	TMEM97
0	0.472408	0.331	0	0	cDC1	AC099560.1
0	0.466366	0.448	0.027	0	cDC1	PLCD1
0	0.456657	0.538	0.032	0	cDC1	NFATC2
0	0.455598	0.435	0.018	0	cDC1	PNMA1
0	0.448941	0.488	0.026	0	cDC1	FKBP1B
0	0.442709	0.448	0.005	0	cDC1	BTLA
0	0.428964	0.458	0.025	0	cDC1	SERPINF2
0	0.4233	0.428	0.015	0	cDC1	EGLN3
0	0.418439	0.418	0.016	0	cDC1	LIMA1
0	0.41487	0.378	0.012	0	cDC1	P2RY10
0	0.402863	0.375	0.011	0	cDC1	BIK
0	0.39576	0.438	0.016	0	cDC1	PPM1J
0	0.383175	0.405	0.026	0	cDC1	MCOLN2
0	0.380555	0.334	0.011	0	cDC1	CCSER1
0	0.374842	0.381	0.007	0	cDC1	DPP4
0	0.372291	0.318	0.011	0	cDC1	ZNF366
0	0.368093	0.398	0.023	0	cDC1	CXCR3
0	0.351607	0.375	0.013	0	cDC1	PLPP1
0	0.341331	0.331	0	0	cDC1	FBXO27
0	0.329233	0.304	0	0	cDC1	ENPP1
0	0.317664	0.258	0.007	0	cDC1	SNX22
0	0.303591	0.344	0.014	0	cDC1	PLEKHA5
0	0.288928	0.378	0.022	0	cDC1	NUBPL
0	0.279843	0.294	0.01	0	cDC1	TPD52
0	0.268044	0.271	0.003	0	cDC1	NCALD
0	0.265174	0.278	0.007	0	cDC1	RAB30
0	0.256197	0.284	0.006	0	cDC1	PARM1
0	0.250553	0.224	0.006	0	cDC1	RAMP1
1.82e-298	0.451791	0.475	0.037	2.61e-294	cDC1	KIF16B
6.81e-292	0.422029	0.522	0.045	9.74e-288	cDC1	P2RY6
2.46e-283	0.400861	0.448	0.034	3.52e-279	cDC1	PTK2
1.44e-275	0.422156	0.528	0.049	2.07e-271	cDC1	SERPINF1
1.57e-269	0.459685	0.548	0.054	2.25e-265	cDC1	2021-09-11
5.1e-262	0.931114	0.458	0.04	7.3e-258	cDC1	C15orf48
3.96e-257	0.672195	0.669	0.086	5.67e-253	cDC1	DENND1B
4.34e-255	1.53505	0.936	0.243	6.21e-251	cDC1	CPNE3
3.01e-251	0.449321	0.522	0.053	4.31e-247	cDC1	GNG7
9.16e-251	0.622977	0.649	0.082	1.31e-246	cDC1	VAC14
6.47e-249	0.650071	0.649	0.084	9.25e-245	cDC1	ITGB7
4.04e-248	0.396209	0.488	0.047	5.78e-244	cDC1	TOMM34
2.54e-247	0.350567	0.418	0.034	3.64e-243	cDC1	THEM4
3.57e-246	0.813357	0.592	0.07	5.11e-242	cDC1	THBD
1.14e-236	0.431509	0.488	0.049	1.63e-232	cDC1	TSPAN33
1.91e-236	0.586467	0.528	0.059	2.73e-232	cDC1	CYP2S1
3.87e-234	0.496803	0.385	0.031	5.54e-230	cDC1	PKIB
3.69e-222	0.889977	0.589	0.077	5.28e-218	cDC1	CD40
9.02e-219	0.294188	0.365	0.03	1.29e-214	cDC1	GSTM2
6.08e-217	0.25196	0.278	0.017	8.7e-213	cDC1	TLR10
1.26e-213	0.727296	0.692	0.108	1.81e-209	cDC1	PTMS
1.04e-206	0.262385	0.304	0.022	1.49e-202	cDC1	AP3M2
1.62e-204	0.268102	0.294	0.021	2.31e-200	cDC1	IRAK2
1.03e-199	0.460024	0.572	0.077	1.47e-195	cDC1	HLA-DOA
1.84e-196	0.351767	0.445	0.048	2.63e-192	cDC1	PON2
2.18e-194	1.99869	0.997	0.464	3.11e-190	cDC1	HLA-DQA1
2.93e-193	0.387985	0.452	0.05	4.19e-189	cDC1	PIM2
8.46e-193	1.008	0.893	0.211	1.21e-188	cDC1	BASP1
1.38e-190	0.400356	0.465	0.054	1.98e-186	cDC1	SLC38A1
3.44e-190	0.542436	0.472	0.056	4.92e-186	cDC1	ATP1B1
2.55e-189	0.648469	0.699	0.119	3.64e-185	cDC1	CAMK2D
1e-188	0.252183	0.274	0.019	1.43e-184	cDC1	CD226
1.03e-188	0.389362	0.448	0.051	1.48e-184	cDC1	CD38
1.79e-186	0.305146	0.368	0.035	2.57e-182	cDC1	NAV1
2.55e-182	1.72633	1	0.99	3.65e-178	cDC1	CD74
8.17e-181	1.8239	0.983	0.642	1.17e-176	cDC1	SNX3
4.06e-180	1.85776	1	0.817	5.8e-176	cDC1	HLA-DPA1
5.07e-180	1.31683	0.933	0.286	7.25e-176	cDC1	IRF8
1.75e-179	2.00161	1	0.774	2.51e-175	cDC1	HLA-DPB1
1.01e-167	1.67032	1	0.911	1.44e-163	cDC1	HLA-DRB1
3.49e-167	0.285314	0.278	0.023	4.99e-163	cDC1	LRRCC1
4.38e-167	1.56834	1	0.927	6.27e-163	cDC1	HLA-DRA
5.8e-167	0.498925	0.592	0.095	8.29e-163	cDC1	BIN1
6.49e-166	0.315404	0.318	0.03	9.29e-162	cDC1	FSCN1
8.4e-166	1.74389	1	0.636	1.2e-161	cDC1	HLA-DQB1
3.85e-165	0.354666	0.462	0.059	5.5e-161	cDC1	SCARB1
4.47e-165	1.05909	0.579	0.099	6.4e-161	cDC1	CREM
1.46e-164	0.33399	0.482	0.064	2.09e-160	cDC1	REC8
4.15e-162	0.7561	0.532	0.083	5.94e-158	cDC1	CKS2
1.87e-160	0.510811	0.559	0.089	2.68e-156	cDC1	LDLRAD4
4.33e-160	1.37381	1	0.99	6.2e-156	cDC1	CST3
6.16e-160	0.860822	0.849	0.233	8.81e-156	cDC1	MZT2A
1.96e-159	1.66137	0.973	0.639	2.81e-155	cDC1	CPVL
2.33e-157	0.284733	0.331	0.033	3.34e-153	cDC1	CTTNBP2NL
6.19e-157	1.116	0.866	0.239	8.85e-153	cDC1	MARCKSL1
3.97e-156	0.875713	0.689	0.143	5.68e-152	cDC1	ARL4C
9.62e-156	0.579257	0.445	0.059	1.38e-151	cDC1	NR4A3
1.28e-155	0.454109	0.585	0.098	1.83e-151	cDC1	LYRM4
2.13e-155	0.4091	0.512	0.076	3.05e-151	cDC1	PTPN22
5.06e-155	0.579451	0.702	0.139	7.24e-151	cDC1	NME4
1.32e-153	0.312374	0.398	0.048	1.89e-149	cDC1	SUSD3
4.25e-153	0.547227	0.385	0.046	6.08e-149	cDC1	VMO1
8.2e-153	0.488233	0.391	0.048	1.17e-148	cDC1	CALCRL
7.07e-152	0.400257	0.415	0.052	1.01e-147	cDC1	PTPRCAP
5.97e-151	0.411741	0.542	0.087	8.54e-147	cDC1	SLC25A33
2.01e-147	0.578136	0.508	0.082	2.87e-143	cDC1	HLA-DQA2
2.93e-146	0.27292	0.418	0.054	4.19e-142	cDC1	FARS2
2.62e-145	0.428375	0.488	0.074	3.74e-141	cDC1	SLC46A3
2.49e-144	0.620323	0.702	0.154	3.56e-140	cDC1	CSRP1
4.38e-143	0.271286	0.365	0.043	6.27e-139	cDC1	TRAF4
2.88e-140	0.799899	0.829	0.225	4.13e-136	cDC1	SHTN1
5.39e-140	0.461602	0.401	0.054	7.72e-136	cDC1	PHLDA2
6.4e-137	0.334551	0.341	0.041	9.16e-133	cDC1	HLA-DQB2
3.8e-136	0.341377	0.462	0.069	5.43e-132	cDC1	DST
3.79e-134	0.282313	0.338	0.04	5.42e-130	cDC1	SLC9A7
4.19e-134	0.505399	0.569	0.106	5.99e-130	cDC1	BATF3
2.21e-132	0.655657	0.803	0.206	3.17e-128	cDC1	ASAP1
5.64e-132	0.261896	0.341	0.041	8.07e-128	cDC1	DGAT2
3.75e-130	0.305457	0.371	0.049	5.37e-126	cDC1	SCML1
3.2e-128	1.02196	0.746	0.192	4.58e-124	cDC1	CD83
7.77e-128	0.865562	0.88	0.304	1.11e-123	cDC1	PPA1
9.22e-127	0.701819	0.819	0.236	1.32e-122	cDC1	GYPC
1.01e-126	0.309785	0.278	0.03	1.45e-122	cDC1	HIC1
4.17e-126	0.264431	0.334	0.041	5.96e-122	cDC1	PLEKHM3
5.93e-126	0.355097	0.485	0.081	8.49e-122	cDC1	SPATS2L
9.49e-126	0.748248	0.846	0.283	1.36e-121	cDC1	CYB5R3
2.26e-124	0.523583	0.629	0.137	3.23e-120	cDC1	FABP5
1.48e-123	0.338691	0.348	0.045	2.11e-119	cDC1	AIM2
1.87e-123	0.262186	0.371	0.051	2.67e-119	cDC1	PDLIM1
1.24e-122	1.01848	0.96	0.523	1.78e-118	cDC1	RGS10
2.25e-122	0.302491	0.405	0.06	3.21e-118	cDC1	ARHGAP5
1.65e-120	0.855599	0.99	0.857	2.36e-116	cDC1	EEF1B2
1.62e-119	0.386245	0.512	0.092	2.32e-115	cDC1	STK17A
9.35e-118	0.844654	0.916	0.363	1.34e-113	cDC1	HMGN1
1.88e-117	0.795	0.809	0.264	2.69e-113	cDC1	HMGA1
2.99e-117	0.457492	0.569	0.113	4.28e-113	cDC1	PDE4B
1.58e-116	1.24191	0.987	0.649	2.27e-112	cDC1	HSPA8
7.1e-116	0.457402	0.572	0.119	1.02e-111	cDC1	MCUR1
2.07e-112	1.12996	0.746	0.218	2.97e-108	cDC1	INSIG1
6.32e-112	0.428745	0.548	0.112	9.05e-108	cDC1	C12orf45
8.59e-112	0.403219	0.405	0.065	1.23e-107	cDC1	TCTN3
2.02e-111	0.372442	0.508	0.098	2.89e-107	cDC1	DCTPP1
6.36e-111	0.878698	0.649	0.161	9.11e-107	cDC1	HSPH1
8.06e-111	0.440243	0.562	0.118	1.15e-106	cDC1	REPIN1
1.14e-110	0.273467	0.421	0.069	1.64e-106	cDC1	ZNF296
1.31e-110	0.436594	0.512	0.101	1.87e-106	cDC1	GPR183
5.02e-110	0.649147	1	0.998	7.19e-106	cDC1	ACTB
4.35e-109	0.327871	0.492	0.092	6.22e-105	cDC1	MAP4K1
2.06e-108	0.445571	0.599	0.133	2.95e-104	cDC1	RAB29
2.63e-108	0.334179	0.385	0.061	3.77e-104	cDC1	INPP5F
1.85e-107	0.322646	0.441	0.077	2.65e-103	cDC1	MIR181A1HG
5.14e-105	0.590257	0.361	0.056	7.35e-101	cDC1	STMN1
6.28e-105	0.561245	0.482	0.097	8.98e-101	cDC1	GPR137B
1.32e-104	0.519802	0.599	0.139	1.89e-100	cDC1	SNX9
1.82e-104	0.78856	0.997	0.955	2.61e-100	cDC1	ACTG1
2.01e-103	0.899114	0.967	0.621	2.88e-99	cDC1	HLA-DMA
6.18e-103	0.366193	0.525	0.108	8.84e-99	cDC1	TSTD1
1.66e-102	0.55996	0.652	0.169	2.37e-98	cDC1	GNA15
3.76e-102	0.413458	0.478	0.094	5.37e-98	cDC1	KPNA2
2.02e-101	0.432395	0.679	0.17	2.89e-97	cDC1	FAM129A
1.94e-100	0.383378	0.565	0.124	2.77e-96	cDC1	TMEM50B
2e-100	0.313268	0.264	0.033	2.86e-96	cDC1	RGS1
2.28e-100	0.747293	0.786	0.257	3.26e-96	cDC1	G3BP2
4.33e-100	0.965574	0.595	0.151	6.19e-96	cDC1	DUSP2
3.5e-99	0.606054	0.669	0.183	5.01e-95	cDC1	TUBA1C
2.87e-98	0.267926	0.482	0.094	4.1e-94	cDC1	OFD1
3.3e-98	0.401804	0.649	0.161	4.71e-94	cDC1	RHOF
4.58e-98	0.574825	0.518	0.116	6.56e-94	cDC1	PFKFB3
6.94e-98	0.316541	0.585	0.134	9.93e-94	cDC1	PPP1R14B
9.04e-98	0.356913	0.538	0.117	1.29e-93	cDC1	HSD17B12
9.37e-98	0.822933	0.98	0.755	1.34e-93	cDC1	TAGLN2
1.09e-97	0.496614	0.385	0.068	1.56e-93	cDC1	VDR
4.07e-96	0.930604	0.722	0.223	5.82e-92	cDC1	PPIF
4.91e-96	0.252356	0.385	0.065	7.03e-92	cDC1	TUBB6
3.78e-95	0.392762	0.515	0.111	5.41e-91	cDC1	NCOA7
5.83e-95	0.547879	0.669	0.177	8.33e-91	cDC1	DSE
1.06e-94	0.287227	0.304	0.044	1.51e-90	cDC1	MAGEF1
1.18e-94	0.617087	0.826	0.281	1.68e-90	cDC1	2021-09-06
1.94e-94	0.281779	0.498	0.103	2.77e-90	cDC1	AGPAT1
2.53e-94	0.534471	0.759	0.231	3.62e-90	cDC1	CCT2
4.96e-94	0.436992	0.569	0.133	7.09e-90	cDC1	FNIP2
1.22e-93	0.684049	0.853	0.327	1.75e-89	cDC1	CDK2AP2
5.53e-93	0.472766	0.535	0.123	7.91e-89	cDC1	NDEL1
1.2e-92	0.594623	0.793	0.253	1.72e-88	cDC1	ELOVL5
1.07e-91	0.441334	0.702	0.196	1.53e-87	cDC1	IFT20
6.69e-91	0.286331	0.294	0.043	9.58e-87	cDC1	ADAM19
2.37e-90	0.392485	0.579	0.141	3.39e-86	cDC1	ODC1
4.81e-90	0.81851	0.783	0.281	6.88e-86	cDC1	CXCL16
8.49e-90	0.523639	0.756	0.229	1.22e-85	cDC1	EVL
1.15e-89	0.433131	0.284	0.041	1.64e-85	cDC1	BAG3
4.1e-89	0.567861	1	0.997	5.86e-85	cDC1	TMSB4X
4.83e-89	0.512369	0.803	0.26	6.91e-85	cDC1	ANXA6
8.73e-89	0.648321	0.833	0.309	1.25e-84	cDC1	TAP1
9.63e-89	0.588374	1	0.962	1.38e-84	cDC1	RPS21
1.01e-88	0.365658	0.579	0.141	1.44e-84	cDC1	HAVCR2
1.21e-88	0.577119	0.806	0.271	1.74e-84	cDC1	SPINT2
8.28e-88	0.288072	0.465	0.096	1.19e-83	cDC1	F11R
3.95e-87	0.434784	0.656	0.18	5.65e-83	cDC1	VOPP1
9.39e-86	0.346237	0.515	0.119	1.34e-81	cDC1	ACSL5
9.94e-86	0.25721	0.418	0.082	1.42e-81	cDC1	GPRIN3
2.72e-85	0.829195	0.92	0.49	3.89e-81	cDC1	CALR
6.98e-85	0.445986	0.639	0.176	9.98e-81	cDC1	FAM162A
8.79e-83	0.565181	0.786	0.275	1.26e-78	cDC1	PEBP1
1.51e-82	0.36152	0.615	0.159	2.16e-78	cDC1	PRDX2
2.65e-82	0.91265	0.796	0.313	3.79e-78	cDC1	HSPD1
7.19e-82	0.431772	0.759	0.241	1.03e-77	cDC1	TECR
8.16e-82	0.695893	0.963	0.689	1.17e-77	cDC1	SUB1
1.16e-81	0.932875	0.806	0.323	1.66e-77	cDC1	HSPE1
1.33e-81	0.41357	0.709	0.211	1.9e-77	cDC1	DSTN
8.74e-81	1.39215	0.933	0.534	1.25e-76	cDC1	TXN
1.35e-80	0.28574	0.341	0.061	1.93e-76	cDC1	SLC25A19
3.27e-80	0.387796	0.535	0.132	4.68e-76	cDC1	TPMT
3.67e-80	0.356093	0.605	0.162	5.25e-76	cDC1	BUD23
4.83e-80	0.852111	0.836	0.356	6.92e-76	cDC1	EZR
5.44e-80	0.454594	0.997	0.985	7.78e-76	cDC1	RPS23
2.14e-79	0.73672	0.926	0.513	3.07e-75	cDC1	CNN2
4.57e-79	0.685104	0.89	0.408	6.54e-75	cDC1	FNBP1
1.3e-78	0.303551	0.522	0.126	1.86e-74	cDC1	EHD4
1.73e-78	0.530383	0.706	0.225	2.47e-74	cDC1	UPF2
2.69e-78	0.561577	0.993	0.913	3.85e-74	cDC1	PPIA
3.53e-78	0.617125	0.866	0.355	5.05e-74	cDC1	C1QBP
7.06e-78	0.328483	0.492	0.115	1.01e-73	cDC1	EDEM1
1.01e-76	0.367941	0.656	0.184	1.45e-72	cDC1	HDAC9
5.67e-76	0.554735	0.99	0.915	8.12e-72	cDC1	RPS5
2.58e-74	0.279144	0.488	0.116	3.69e-70	cDC1	RCN2
2.94e-74	0.673785	0.679	0.229	4.21e-70	cDC1	SERPINB9
2.76e-73	0.288051	0.522	0.131	3.95e-69	cDC1	TSPAN3
4.54e-73	0.412732	0.585	0.171	6.49e-69	cDC1	SEPHS2
6.59e-72	0.270591	0.448	0.104	9.43e-68	cDC1	PDE4DIP
9.62e-72	0.371009	0.666	0.203	1.38e-67	cDC1	MPC2
2.66e-71	0.268111	0.431	0.098	3.8e-67	cDC1	HPS5
1.25e-70	0.266132	0.415	0.093	1.78e-66	cDC1	FBXO34
1.33e-70	0.390623	0.605	0.178	1.91e-66	cDC1	ICAM1
1.66e-70	0.271816	0.431	0.099	2.37e-66	cDC1	HSDL2
6.24e-70	0.383346	0.635	0.193	8.93e-66	cDC1	PRMT1
1.12e-69	0.36837	0.331	0.066	1.61e-65	cDC1	ZNF331
1.3e-69	0.367488	0.612	0.179	1.87e-65	cDC1	DEGS1
3.73e-69	0.49519	0.662	0.205	5.33e-65	cDC1	HSPB1
4.29e-69	0.433636	0.706	0.236	6.14e-65	cDC1	CACYBP
4.38e-69	0.466993	0.488	0.13	6.27e-65	cDC1	BIRC3
5.75e-69	0.5046	0.682	0.231	8.23e-65	cDC1	MRPL18
6.71e-69	0.697562	0.522	0.151	9.6e-65	cDC1	DDIT4
1.44e-68	0.346768	0.538	0.148	2.05e-64	cDC1	SERTAD1
2.34e-68	0.634483	0.997	0.985	3.35e-64	cDC1	VIM
2.73e-68	0.666198	0.639	0.216	3.9e-64	cDC1	CHMP1B
7.49e-68	0.346485	0.475	0.12	1.07e-63	cDC1	REV3L
1.23e-67	0.269813	0.495	0.127	1.76e-63	cDC1	TRPV2
1.72e-67	0.876687	0.88	0.438	2.46e-63	cDC1	SRSF7
2.01e-67	0.869049	0.957	0.609	2.87e-63	cDC1	HSP90AB1
3.32e-67	0.386844	0.692	0.222	4.75e-63	cDC1	KCNK6
4.63e-67	0.424192	0.742	0.254	6.63e-63	cDC1	ACTN1
3.17e-66	1.00921	0.341	0.075	4.54e-62	cDC1	HSPA1B
8.49e-66	0.560992	0.987	0.883	1.21e-61	cDC1	RPSA
1.08e-65	0.316685	0.475	0.123	1.54e-61	cDC1	ATP6V1H
7.34e-64	0.456088	0.849	0.344	1.05e-59	cDC1	RAB11A
7.74e-64	0.681851	0.799	0.349	1.11e-59	cDC1	ID2
8.1e-64	0.531435	0.987	0.92	1.16e-59	cDC1	GSTP1
2.14e-63	0.548795	0.829	0.366	3.06e-59	cDC1	ENSA
2.52e-63	0.289651	0.502	0.136	3.61e-59	cDC1	CCDC6
3.09e-63	0.264754	0.522	0.143	4.42e-59	cDC1	SNRNP25
7.51e-63	0.726851	0.977	0.904	1.07e-58	cDC1	RPS29
1.07e-62	0.633406	0.923	0.587	1.53e-58	cDC1	PPT1
4.11e-62	0.34845	0.602	0.187	5.88e-58	cDC1	IGFBP7
7.37e-62	0.364266	0.662	0.222	1.05e-57	cDC1	AKR7A2
1e-61	0.309729	0.572	0.17	1.43e-57	cDC1	NOP58
1.7e-61	0.640226	0.95	0.66	2.43e-57	cDC1	MIF
2.08e-61	0.301083	0.401	0.097	2.98e-57	cDC1	TIPARP
4.38e-61	0.504962	0.649	0.226	6.26e-57	cDC1	GTF2B
7.53e-61	1.34748	0.95	0.673	1.08e-56	cDC1	HLA-DRB5
8.74e-60	0.254989	0.512	0.142	1.25e-55	cDC1	RFTN1
1.05e-59	0.319676	0.525	0.152	1.5e-55	cDC1	OXSR1
1.41e-59	0.514503	0.86	0.408	2.02e-55	cDC1	NDUFV2
1.73e-59	0.571714	0.95	0.788	2.48e-55	cDC1	NME2
1.99e-59	0.501786	0.987	0.891	2.85e-55	cDC1	LSP1
2.73e-59	0.275206	0.365	0.085	3.91e-55	cDC1	DNAJB9
8.02e-59	0.361288	0.732	0.261	1.15e-54	cDC1	UBE2N
1.59e-57	0.579729	0.662	0.256	2.28e-53	cDC1	TUBB4B
3.3e-57	0.58586	0.94	0.664	4.72e-53	cDC1	NPM1
2.22e-56	0.536746	0.89	0.448	3.18e-52	cDC1	SRSF2
3.14e-55	0.253598	0.585	0.182	4.49e-51	cDC1	MIR4435-2HG
5.17e-55	0.255253	0.505	0.147	7.4e-51	cDC1	PTGES2
9.54e-55	0.515937	0.943	0.721	1.36e-50	cDC1	HINT1
1.51e-54	0.364383	0.589	0.195	2.16e-50	cDC1	SYAP1
1.54e-54	0.429125	0.983	0.942	2.21e-50	cDC1	RPL23A
5.57e-54	0.294911	0.625	0.207	7.97e-50	cDC1	TMEM243
1.71e-53	0.573661	0.803	0.364	2.45e-49	cDC1	ATP1A1
2.15e-52	0.576011	0.95	0.683	3.08e-48	cDC1	UCP2
3.99e-52	0.805054	0.926	0.558	5.71e-48	cDC1	TUBA1B
9.9e-52	0.250598	0.595	0.196	1.42e-47	cDC1	SDHA
3.29e-51	0.583818	0.896	0.533	4.71e-47	cDC1	LDHA
6.6e-51	0.363892	0.482	0.148	9.45e-47	cDC1	ISG20
1.14e-50	0.295561	0.565	0.186	1.63e-46	cDC1	EIF4A3
1.51e-50	0.3213	0.997	0.993	2.16e-46	cDC1	RPL10
5.19e-50	0.446098	1	0.955	7.42e-46	cDC1	RPLP0
8.94e-50	0.282574	0.672	0.241	1.28e-45	cDC1	NDUFC2
1.44e-49	0.341513	0.993	0.966	2.06e-45	cDC1	RPL14
1.93e-49	0.300449	0.421	0.122	2.76e-45	cDC1	MCM5
3.26e-49	0.271813	0.599	0.203	4.67e-45	cDC1	ST8SIA4
4.66e-49	0.409648	0.993	0.948	6.67e-45	cDC1	RPL5
1.25e-48	0.499054	0.739	0.323	1.79e-44	cDC1	SELENOK
1.3e-48	0.516203	0.91	0.524	1.86e-44	cDC1	PDIA3
1.73e-48	0.376797	0.559	0.194	2.48e-44	cDC1	CDK2AP1
3.48e-48	0.968536	0.793	0.452	4.97e-44	cDC1	MYADM
3.77e-48	0.485709	0.829	0.396	5.39e-44	cDC1	JPT1
6.96e-48	0.478534	0.967	0.771	9.96e-44	cDC1	EEF1G
2.59e-47	0.512945	0.923	0.535	3.71e-43	cDC1	RAN
5.28e-47	0.343195	0.692	0.271	7.56e-43	cDC1	DAPP1
7.49e-47	0.498132	0.853	0.426	1.07e-42	cDC1	TPM4
9.36e-47	0.310449	1	0.99	1.34e-42	cDC1	RPS8
2.22e-46	0.686326	0.819	0.421	3.18e-42	cDC1	DNAJA1
2.28e-46	0.322654	0.502	0.166	3.26e-42	cDC1	CSRNP1
2.81e-46	0.680832	0.977	0.858	4.02e-42	cDC1	UBC
3.37e-46	0.283259	0.669	0.245	4.82e-42	cDC1	TCP1
4.38e-46	0.252782	0.612	0.217	6.26e-42	cDC1	MIF4GD
9.22e-46	0.287737	0.696	0.261	1.32e-41	cDC1	GSN
2.19e-45	0.269841	0.525	0.178	3.13e-41	cDC1	RAB5A
4.62e-45	0.266164	0.535	0.181	6.61e-41	cDC1	SLC1A5
8.51e-45	0.251839	0.656	0.241	1.22e-40	cDC1	TMX1
3.32e-44	0.38517	0.776	0.334	4.75e-40	cDC1	ARL6IP1
7.19e-44	0.256124	0.569	0.202	1.03e-39	cDC1	MESD
1.14e-43	0.355681	1	0.965	1.63e-39	cDC1	RPS6
1.41e-43	0.295702	0.649	0.247	2.02e-39	cDC1	BLOC1S6
2.31e-43	0.271091	0.612	0.225	3.31e-39	cDC1	UBL7
2.86e-43	0.263919	0.696	0.273	4.09e-39	cDC1	UBE2A
4.05e-43	0.285902	0.418	0.13	5.79e-39	cDC1	NFKBID
4.99e-43	0.370054	0.696	0.285	7.14e-39	cDC1	IDH2
6.84e-43	0.301095	0.776	0.32	9.79e-39	cDC1	DCXR
2.23e-42	0.756174	0.565	0.216	3.19e-38	cDC1	DNAJB1
3.53e-42	0.458197	0.953	0.731	5.06e-38	cDC1	PPIB
1.11e-41	0.342802	0.632	0.249	1.59e-37	cDC1	IL16
2.54e-41	0.294963	0.569	0.211	3.63e-37	cDC1	GNA13
3.7e-41	0.389209	0.823	0.404	5.29e-37	cDC1	MBP
5.93e-41	0.366228	0.729	0.318	8.49e-37	cDC1	PRCP
8.4e-41	0.278294	0.669	0.263	1.2e-36	cDC1	MLEC
2.07e-40	0.305059	0.753	0.326	2.97e-36	cDC1	SRI
3.4e-40	0.321034	0.99	0.967	4.87e-36	cDC1	RPL21
4.52e-40	0.386213	0.806	0.388	6.47e-36	cDC1	ETV6
5.31e-40	0.279728	0.669	0.265	7.6e-36	cDC1	MAPK1IP1L
1.13e-39	0.422946	0.993	0.939	1.61e-35	cDC1	H3F3B
1.28e-39	0.266199	0.395	0.123	1.83e-35	cDC1	MYCL
1.9e-39	0.394575	0.699	0.307	2.71e-35	cDC1	CYCS
2.4e-39	0.286082	0.749	0.32	3.43e-35	cDC1	SEC13
3.26e-39	0.430509	0.92	0.652	4.67e-35	cDC1	NAP1L1
8.55e-39	0.460195	0.435	0.148	1.22e-34	cDC1	FOSB
1.1e-38	0.396055	0.883	0.518	1.57e-34	cDC1	TRMT112
1.69e-38	0.274109	0.656	0.269	2.42e-34	cDC1	PSMA3
2.08e-38	0.434617	0.679	0.288	2.98e-34	cDC1	HIST1H4C
2.72e-38	0.390214	0.776	0.393	3.9e-34	cDC1	APH1A
2.78e-38	0.489382	0.612	0.27	3.98e-34	cDC1	BCL3
2.84e-38	0.483239	0.88	0.546	4.06e-34	cDC1	DYNLL1
2.84e-38	0.320898	0.786	0.358	4.07e-34	cDC1	PDIA6
4.41e-38	0.430054	0.993	0.925	6.31e-34	cDC1	S100A10
4.71e-38	0.494814	0.391	0.131	6.74e-34	cDC1	NR4A2
7.42e-38	0.444049	0.786	0.411	1.06e-33	cDC1	LDHB
9.97e-38	0.310113	0.686	0.289	1.43e-33	cDC1	ARL5A
2.79e-37	0.283796	0.656	0.264	3.99e-33	cDC1	HNRNPAB
3.5e-37	0.300521	0.997	0.961	5.01e-33	cDC1	MYL6
4.54e-37	0.481016	0.789	0.413	6.5e-33	cDC1	BRD2
7.45e-37	0.320205	0.766	0.345	1.07e-32	cDC1	EIF6
7.88e-37	0.59595	0.535	0.219	1.13e-32	cDC1	CXCR4
1.63e-36	0.298103	0.809	0.374	2.33e-32	cDC1	VDAC1
1.71e-36	0.312124	0.779	0.354	2.44e-32	cDC1	TMEM14C
2.47e-36	0.877502	0.923	0.709	3.54e-32	cDC1	HSP90AA1
2.45e-35	0.293163	0.632	0.263	3.51e-31	cDC1	RANBP1
3.25e-35	0.33001	0.803	0.392	4.65e-31	cDC1	CCT6A
3.47e-35	0.406877	0.699	0.321	4.97e-31	cDC1	MAT2A
3.86e-35	0.26127	0.622	0.249	5.52e-31	cDC1	MDH1
3.86e-35	0.395645	0.946	0.604	5.52e-31	cDC1	ACTR3
5.89e-35	0.373771	0.819	0.426	8.43e-31	cDC1	HNRNPA0
6.69e-35	0.257352	0.495	0.185	9.57e-31	cDC1	MALT1
7.58e-35	0.415371	0.863	0.48	1.08e-30	cDC1	ARF6
8.36e-35	0.328768	0.993	0.986	1.2e-30	cDC1	RPS27
4.02e-34	0.472942	0.712	0.347	5.75e-30	cDC1	ATP1B3
4.74e-34	0.383371	0.849	0.48	6.78e-30	cDC1	EIF5A
5.76e-34	0.293043	0.993	0.944	8.24e-30	cDC1	RPL35
9.71e-34	0.288449	0.987	0.962	1.39e-29	cDC1	RPS25
1.78e-33	0.388267	0.893	0.519	2.55e-29	cDC1	MZT2B
2.28e-33	0.259681	0.716	0.326	3.26e-29	cDC1	PRMT2
2.51e-33	0.266899	0.696	0.312	3.59e-29	cDC1	SNRPD1
2.51e-33	0.416732	0.749	0.38	3.6e-29	cDC1	HSPA5
7.49e-33	0.306435	0.997	0.985	1.07e-28	cDC1	PTMA
9.43e-33	0.322226	0.796	0.387	1.35e-28	cDC1	LSM6
1e-32	0.375394	0.926	0.604	1.43e-28	cDC1	PTPRE
1.02e-32	0.55886	0.933	0.706	1.45e-28	cDC1	CTSZ
2.68e-32	0.257537	0.682	0.299	3.83e-28	cDC1	NUCKS1
3.57e-32	0.262222	0.649	0.283	5.11e-28	cDC1	CNPPD1
1.7e-31	0.346786	0.97	0.881	2.43e-27	cDC1	RPL31
2.18e-31	0.310829	0.773	0.389	3.12e-27	cDC1	DNAJC15
1.17e-30	0.272562	0.993	0.961	1.67e-26	cDC1	RPS16
1.27e-30	0.329841	0.886	0.514	1.81e-26	cDC1	FAM49B
1.63e-30	0.32636	0.886	0.494	2.33e-26	cDC1	HLA-DMB
1.99e-30	0.34353	0.93	0.661	2.85e-26	cDC1	COX5A
2.52e-30	0.399147	0.87	0.536	3.6e-26	cDC1	NCL
3.01e-30	0.332228	0.538	0.235	4.31e-26	cDC1	KDM6B
1.79e-29	0.498446	0.706	0.404	2.57e-25	cDC1	RAB11FIP1
2.06e-29	0.30508	0.98	0.911	2.95e-25	cDC1	ARPC2
4.01e-29	0.351901	0.873	0.511	5.73e-25	cDC1	SFPQ
1.3e-28	0.339104	0.856	0.469	1.86e-24	cDC1	NAAA
1.76e-28	0.33564	0.669	0.324	2.51e-24	cDC1	DNAJB6
1.8e-28	0.399386	0.926	0.596	2.58e-24	cDC1	LGALS2
1.88e-28	0.314465	0.783	0.433	2.69e-24	cDC1	HERPUD1
3.06e-28	0.295558	0.776	0.391	4.38e-24	cDC1	CAT
3.54e-28	0.32349	0.97	0.798	5.06e-24	cDC1	MYL12A
5.16e-28	0.31514	0.809	0.444	7.38e-24	cDC1	CKLF
6.31e-28	0.307725	0.983	0.914	9.03e-24	cDC1	RPL10A
1.03e-27	0.325754	0.672	0.343	1.48e-23	cDC1	NFE2L2
1.43e-27	0.499201	0.756	0.421	2.05e-23	cDC1	PPP1R15A
2.45e-27	0.282046	0.696	0.334	3.51e-23	cDC1	CLEC2B
2.65e-27	0.251887	0.993	0.955	3.79e-23	cDC1	CFL1
5.52e-27	0.290473	0.997	0.973	7.9e-23	cDC1	RPS18
1.76e-26	0.334998	0.706	0.356	2.51e-22	cDC1	YPEL5
1.78e-26	0.454744	0.95	0.736	2.55e-22	cDC1	CRIP1
3.35e-26	0.335919	0.953	0.735	4.79e-22	cDC1	SLC25A3
3.84e-26	0.320836	0.886	0.538	5.49e-22	cDC1	SAP18
5.54e-26	0.305254	0.849	0.521	7.93e-22	cDC1	RAB7A
6.76e-26	1.2866	0.589	0.315	9.68e-22	cDC1	HSPA1A
8.34e-26	0.300481	0.993	0.908	1.19e-21	cDC1	RPL4
1.05e-25	0.25787	0.819	0.433	1.5e-21	cDC1	XRCC6
1.14e-25	0.300023	0.729	0.382	1.64e-21	cDC1	ATP2B1
1.5e-25	0.374463	0.94	0.832	2.15e-21	cDC1	RPL27A
1.82e-25	0.270305	0.99	0.938	2.6e-21	cDC1	RPL3
2.3e-25	0.281223	0.973	0.865	3.29e-21	cDC1	COX7C
4.81e-25	0.51826	0.786	0.441	6.88e-21	cDC1	TUBB
7.26e-25	0.28057	0.331	0.124	1.04e-20	cDC1	DUSP5
1.02e-24	0.359538	0.809	0.493	1.46e-20	cDC1	BID
2.89e-24	0.251355	0.542	0.243	4.13e-20	cDC1	NFKB1
7.36e-24	0.315446	0.452	0.195	1.05e-19	cDC1	NR4A1
7.93e-24	0.377976	0.91	0.626	1.14e-19	cDC1	UBB
1.14e-23	0.414557	0.736	0.427	1.63e-19	cDC1	YBX3
1.38e-22	0.337384	0.863	0.595	1.97e-18	cDC1	PLEK
2.32e-22	0.257641	0.997	0.954	3.31e-18	cDC1	RPL37A
2.48e-22	0.255119	0.789	0.443	3.55e-18	cDC1	PSMA6
3.36e-22	0.282329	0.766	0.417	4.81e-18	cDC1	LITAF
6.32e-22	0.300634	1	0.991	9.05e-18	cDC1	HLA-B
8.53e-22	0.606027	0.167	0.048	1.22e-17	cDC1	IL32
1.15e-21	0.255428	0.793	0.428	1.64e-17	cDC1	VCP
2.18e-21	0.312298	0.943	0.743	3.12e-17	cDC1	RNASET2
2.52e-21	0.306693	0.93	0.714	3.61e-17	cDC1	YWHAZ
3.09e-21	0.298146	0.916	0.689	4.42e-17	cDC1	EIF3L
4.21e-21	0.291355	0.926	0.663	6.03e-17	cDC1	PSMB9
5.14e-21	0.339354	0.348	0.143	7.35e-17	cDC1	GLA
9.57e-21	0.295585	0.933	0.723	1.37e-16	cDC1	SLC25A5
6.39e-20	0.252265	0.957	0.785	9.15e-16	cDC1	PSME1
6.8e-20	0.433906	0.508	0.28	9.73e-16	cDC1	CDKN1A
6.82e-20	0.308975	0.936	0.748	9.76e-16	cDC1	ENO1
4.31e-19	0.257986	0.98	0.929	6.16e-15	cDC1	MT-ND4L
8.37e-19	0.284634	0.91	0.722	1.2e-14	cDC1	C1orf162
1.54e-18	0.263969	0.997	0.963	2.21e-14	cDC1	PABPC1
1.55e-18	0.297606	0.893	0.619	2.22e-14	cDC1	SYNGR2
2.84e-18	0.34139	0.227	0.083	4.07e-14	cDC1	G0S2
3.78e-18	0.3964	0.846	0.572	5.41e-14	cDC1	TUBA1A
4.5e-18	0.274226	0.117	0.03	6.45e-14	cDC1	CD3E
3.06e-17	0.299145	0.91	0.715	4.37e-13	cDC1	RPS20
5.75e-17	0.283468	0.95	0.819	8.23e-13	cDC1	HNRNPA1
8.13e-17	0.2835	0.876	0.657	1.16e-12	cDC1	ATP5F1B
6.1e-16	0.256565	0.926	0.699	8.73e-12	cDC1	SARAF
8.48e-15	0.271107	0.88	0.651	1.21e-10	cDC1	ATP5MC3
3.44e-13	0.281757	0.656	0.409	4.92e-09	cDC1	HMOX1
5.35e-12	0.250705	0.104	0.032	7.66e-08	cDC1	IL7R
2.8e-11	0.268632	0.843	0.622	4e-07	cDC1	DBI
4.28e-10	0.293838	0.863	0.605	6.13e-06	cDC1	H2AFZ
3.87e-09	0.306013	0.104	0.038	5.53e-05	cDC1	CD7
7.05e-09	0.521267	0.796	0.61	0.000101	cDC1	SQSTM1
3.49e-08	0.461409	0.385	0.235	0.000499	cDC1	SGK1
0.0058356	0.386369	0.127	0.086	1	cDC1	CCL5
0	2.20549	0.998	0.439	0	cDC2-CLEC10A	HLA-DQA1
0	1.96688	0.827	0.035	0	cDC2-CLEC10A	FCER1A
0	1.86472	1	0.764	0	cDC2-CLEC10A	HLA-DPB1
0	1.72186	0.829	0.043	0	cDC2-CLEC10A	CD1C
0	1.67294	1	0.923	0	cDC2-CLEC10A	HLA-DRA
0	1.66266	0.996	0.619	0	cDC2-CLEC10A	HLA-DQB1
0	1.61432	1	0.809	0	cDC2-CLEC10A	HLA-DPA1
0	1.54643	0.822	0.086	0	cDC2-CLEC10A	CLEC10A
0	1.50052	1	0.907	0	cDC2-CLEC10A	HLA-DRB1
0	1.42316	1	0.99	0	cDC2-CLEC10A	CD74
0	1.32079	0.958	0.659	0	cDC2-CLEC10A	HLA-DRB5
0	1.29719	0.539	0.08	0	cDC2-CLEC10A	GPR183
0	1.21695	0.427	0.086	0	cDC2-CLEC10A	CREM
0	1.16038	0.645	0.026	0	cDC2-CLEC10A	ENHO
0	1.12459	0.406	0.065	0	cDC2-CLEC10A	LMNA
0	1.09544	0.368	0.041	0	cDC2-CLEC10A	AREG
0	1.03651	0.474	0.114	0	cDC2-CLEC10A	NR4A2
0	1.00739	0.335	0.055	0	cDC2-CLEC10A	RGCC
0	0.965599	0.984	0.604	0	cDC2-CLEC10A	HLA-DMA
0	0.940996	0.669	0.119	0	cDC2-CLEC10A	ARL4C
0	0.914336	0.363	0.046	0	cDC2-CLEC10A	NR4A3
0	0.88992	0.998	0.989	0	cDC2-CLEC10A	CST3
0	0.882866	0.267	0.031	0	cDC2-CLEC10A	C15orf48
0	0.797527	0.847	0.232	0	cDC2-CLEC10A	GSN
0	0.734956	0.84	0.28	0	cDC2-CLEC10A	PPA1
0	0.732492	0.628	0.128	0	cDC2-CLEC10A	DDIT4
0	0.701112	0.894	0.339	0	cDC2-CLEC10A	HMGN1
0	0.696361	0.64	0.127	0	cDC2-CLEC10A	GPAT3
0	0.692887	0.597	0.096	0	cDC2-CLEC10A	PHACTR1
0	0.685564	0.188	0.013	0	cDC2-CLEC10A	SDS
0	0.679806	0.978	0.761	0	cDC2-CLEC10A	EEF1G
0	0.66361	0.989	0.878	0	cDC2-CLEC10A	RPSA
0	0.654472	0.394	0.012	0	cDC2-CLEC10A	CD1E
0	0.653351	0.559	0.089	0	cDC2-CLEC10A	FCGR2B
0	0.646756	0.997	0.953	0	cDC2-CLEC10A	RPLP0
0	0.625131	0.694	0.191	0	cDC2-CLEC10A	BASP1
0	0.624468	0.791	0.135	0	cDC2-CLEC10A	PLD4
0	0.618131	0.442	0.03	0	cDC2-CLEC10A	CST7
0	0.609947	0.992	0.911	0	cDC2-CLEC10A	RPS5
0	0.589263	0.988	0.851	0	cDC2-CLEC10A	EEF1B2
0	0.571192	0.535	0.024	0	cDC2-CLEC10A	NDRG2
0	0.567002	0.788	0.251	0	cDC2-CLEC10A	PEBP1
0	0.561798	0.757	0.233	0	cDC2-CLEC10A	PEA15
0	0.548703	0.557	0.054	0	cDC2-CLEC10A	HLA-DOA
0	0.547719	0.989	0.946	0	cDC2-CLEC10A	RPL5
0	0.544142	0.802	0.295	0	cDC2-CLEC10A	PRCP
0	0.531985	0.362	0.016	0	cDC2-CLEC10A	PKIB
0	0.517988	0.994	0.91	0	cDC2-CLEC10A	PPIA
0	0.502441	0.755	0.25	0	cDC2-CLEC10A	SPINT2
0	0.498819	0.507	0.066	0	cDC2-CLEC10A	ITGB7
0	0.494802	0.995	0.964	0	cDC2-CLEC10A	RPS6
0	0.475894	0.393	0.042	0	cDC2-CLEC10A	ATP1B1
0	0.464048	0.329	0.026	0	cDC2-CLEC10A	IL1R2
0	0.454037	0.599	0.153	0	cDC2-CLEC10A	TMEM109
0	0.439125	0.504	0.077	0	cDC2-CLEC10A	BIN1
0	0.438817	0.994	0.984	0	cDC2-CLEC10A	RPS23
0	0.438578	0.575	0.125	0	cDC2-CLEC10A	IL18
0	0.428889	0.221	0.024	0	cDC2-CLEC10A	RGS1
0	0.427034	0.433	0.03	0	cDC2-CLEC10A	CLIC2
0	0.426315	0.161	0.009	0	cDC2-CLEC10A	DUSP4
0	0.42602	0.37	0.022	0	cDC2-CLEC10A	TMEM273
0	0.42067	0.452	0.047	0	cDC2-CLEC10A	FLT3
0	0.407652	0.419	0.037	0	cDC2-CLEC10A	SLC38A1
0	0.405808	0.398	0.044	0	cDC2-CLEC10A	LGMN
0	0.390727	0.429	0.038	0	cDC2-CLEC10A	ADAM28
0	0.385615	1	0.998	0	cDC2-CLEC10A	EEF1A1
0	0.382908	0.375	0.036	0	cDC2-CLEC10A	PDLIM1
0	0.380683	0.266	0.016	0	cDC2-CLEC10A	PPP1R14A
0	0.376735	0.364	0.07	0	cDC2-CLEC10A	HLA-DQA2
0	0.366025	0.591	0.157	0	cDC2-CLEC10A	FAM162A
0	0.348879	0.33	0.054	0	cDC2-CLEC10A	TCTN3
0	0.348398	0.371	0.032	0	cDC2-CLEC10A	AFF3
0	0.344861	0.289	0.038	0	cDC2-CLEC10A	CCND2
0	0.343821	0.454	0.076	0	cDC2-CLEC10A	MAP4K1
0	0.334462	0.389	0.062	0	cDC2-CLEC10A	NREP
0	0.328982	0.403	0.066	0	cDC2-CLEC10A	ALCAM
0	0.326255	0.397	0.068	0	cDC2-CLEC10A	SPATS2L
0	0.322967	0.354	0.035	0	cDC2-CLEC10A	PON2
0	0.319316	0.329	0.035	0	cDC2-CLEC10A	P2RY6
0	0.317819	0.161	0.008	0	cDC2-CLEC10A	GEM
0	0.314924	0.312	0.022	0	cDC2-CLEC10A	NFATC2
0	0.312824	0.305	0.04	0	cDC2-CLEC10A	GRASP
0	0.299677	0.208	0.02	0	cDC2-CLEC10A	NET1
0	0.299499	0.351	0.047	0	cDC2-CLEC10A	CYP2S1
0	0.284987	0.279	0.021	0	cDC2-CLEC10A	CD72
0	0.282317	0.388	0.064	0	cDC2-CLEC10A	CACNA2D3
0	0.26003	0.189	0.014	0	cDC2-CLEC10A	FPR3
0	0.255648	0.252	0.014	0	cDC2-CLEC10A	LTC4S
0	0.253932	0.319	0.04	0	cDC2-CLEC10A	SPNS3
8.64e-308	0.426958	0.996	0.979	1.24e-303	cDC2-CLEC10A	RPS3
1.24e-303	0.455209	0.731	0.243	1.77e-299	cDC2-CLEC10A	HMGA1
6.95e-303	0.543035	0.492	0.123	9.95e-299	cDC2-CLEC10A	FABP5
2.86e-300	0.494296	0.152	0.012	4.09e-296	cDC2-CLEC10A	CCR7
2.42e-299	0.900901	0.498	0.136	3.46e-295	cDC2-CLEC10A	DUSP2
9.39e-298	0.536911	0.993	0.936	1.34e-293	cDC2-CLEC10A	RPL3
1.57e-287	0.468826	0.276	0.045	2.25e-283	cDC2-CLEC10A	PHLDA2
1.74e-286	0.563003	0.99	0.926	2.49e-282	cDC2-CLEC10A	MT-ND4L
1.16e-284	0.692906	0.303	0.055	1.66e-280	cDC2-CLEC10A	ZNF331
4.25e-281	0.277221	0.45	0.106	6.08e-277	cDC2-CLEC10A	IL2RG
3.64e-280	0.478843	0.994	0.972	5.2e-276	cDC2-CLEC10A	RPS18
2.08e-277	0.982115	0.781	0.337	2.97e-273	cDC2-CLEC10A	EZR
1.5e-276	0.711324	0.939	0.54	2.15e-272	cDC2-CLEC10A	TUBA1B
5.05e-276	0.406242	0.681	0.219	7.23e-272	cDC2-CLEC10A	CIITA
2.88e-274	0.275084	0.234	0.033	4.13e-270	cDC2-CLEC10A	AVPI1
7.4e-274	0.26741	0.341	0.066	1.06e-269	cDC2-CLEC10A	MIR181A1HG
1.29e-272	0.418271	0.543	0.156	1.84e-268	cDC2-CLEC10A	RALA
7.66e-269	0.272765	0.38	0.082	1.1e-264	cDC2-CLEC10A	KPNA2
9.88e-269	0.398282	0.996	0.964	1.41e-264	cDC2-CLEC10A	RPL15
2.52e-266	0.303202	0.421	0.1	3.6e-262	cDC2-CLEC10A	C12orf45
3.03e-266	0.465364	0.994	0.911	4.34e-262	cDC2-CLEC10A	RPL10A
4.87e-266	0.433754	0.732	0.261	6.97e-262	cDC2-CLEC10A	2021-09-06
4.63e-265	0.323459	0.56	0.159	6.63e-261	cDC2-CLEC10A	ADAM8
8.76e-265	0.379414	0.666	0.215	1.25e-260	cDC2-CLEC10A	MZT2A
1.13e-263	0.390824	0.432	0.107	1.61e-259	cDC2-CLEC10A	REV3L
1.81e-263	0.590412	0.963	0.709	2.59e-259	cDC2-CLEC10A	HINT1
5.61e-261	0.367716	0.994	0.981	8.03e-257	cDC2-CLEC10A	RPS7
4.04e-254	0.266636	0.355	0.077	5.78e-250	cDC2-CLEC10A	SLC25A33
2.28e-251	0.630011	0.76	0.303	3.26e-247	cDC2-CLEC10A	HSPE1
2.36e-251	0.432748	0.174	0.02	3.38e-247	cDC2-CLEC10A	OLR1
7.52e-250	0.375123	0.664	0.221	1.08e-245	cDC2-CLEC10A	LPXN
1.03e-248	0.687105	0.84	0.397	1.47e-244	cDC2-CLEC10A	LITAF
1.12e-245	0.552615	0.956	0.65	1.61e-241	cDC2-CLEC10A	NPM1
5.47e-245	0.328711	1	0.993	7.83e-241	cDC2-CLEC10A	RPL10
1.12e-244	0.376934	0.996	0.98	1.6e-240	cDC2-CLEC10A	RPS2
7.83e-244	0.773545	0.577	0.201	1.12e-239	cDC2-CLEC10A	CXCR4
7.86e-243	0.688275	0.595	0.207	1.13e-238	cDC2-CLEC10A	PPIF
2.9e-237	0.532191	0.994	0.954	4.15e-233	cDC2-CLEC10A	ACTG1
9.23e-237	0.434493	0.804	0.335	1.32e-232	cDC2-CLEC10A	C1QBP
1.96e-236	0.552604	0.736	0.294	2.81e-232	cDC2-CLEC10A	HSPD1
4.57e-236	0.434337	0.796	0.333	6.53e-232	cDC2-CLEC10A	TMEM14C
1.29e-234	0.378081	0.993	0.984	1.84e-230	cDC2-CLEC10A	RPS3A
2.58e-234	0.509538	0.915	0.474	3.69e-230	cDC2-CLEC10A	HLA-DMB
2.75e-233	0.350177	0.996	0.974	3.93e-229	cDC2-CLEC10A	RPL7A
2.24e-228	0.258775	0.304	0.063	3.21e-224	cDC2-CLEC10A	BORCS5
8.39e-226	1.27077	0.548	0.205	1.2e-221	cDC2-CLEC10A	INSIG1
3.18e-224	0.391138	0.989	0.94	4.55e-220	cDC2-CLEC10A	RPL23A
3.92e-224	0.254422	0.271	0.053	5.61e-220	cDC2-CLEC10A	SLC25A19
4.27e-222	0.313203	0.544	0.171	6.1e-218	cDC2-CLEC10A	IGFBP7
4.32e-222	1.00647	0.431	0.135	6.19e-218	cDC2-CLEC10A	FOSB
2.01e-218	0.281622	0.532	0.164	2.87e-214	cDC2-CLEC10A	DEGS1
6.73e-218	0.883461	0.52	0.179	9.63e-214	cDC2-CLEC10A	CD83
5.32e-217	0.303135	0.591	0.195	7.61e-213	cDC2-CLEC10A	EIF2AK4
1.01e-216	0.717105	0.953	0.635	1.44e-212	cDC2-CLEC10A	HSPA8
2.45e-216	0.303005	0.632	0.212	3.5e-212	cDC2-CLEC10A	IL13RA1
1.27e-215	0.250193	0.522	0.159	1.82e-211	cDC2-CLEC10A	MRPL3
1.12e-214	0.468798	0.967	0.78	1.61e-210	cDC2-CLEC10A	NME2
2.92e-214	0.280489	0.21	0.034	4.17e-210	cDC2-CLEC10A	ANKRD37
7.33e-213	0.402165	0.76	0.311	1.05e-208	cDC2-CLEC10A	APEX1
2.75e-211	0.463621	0.537	0.18	3.93e-207	cDC2-CLEC10A	SYAP1
2.93e-211	0.465747	0.384	0.103	4.19e-207	cDC2-CLEC10A	PDE4B
6.42e-211	0.358578	0.995	0.971	9.19e-207	cDC2-CLEC10A	RPS4X
1.19e-210	0.496941	0.945	0.677	1.7e-206	cDC2-CLEC10A	EIF3L
1.43e-205	0.333075	0.997	0.964	2.04e-201	cDC2-CLEC10A	RPL14
6.55e-199	0.474473	0.669	0.269	9.38e-195	cDC2-CLEC10A	MAP3K8
2.42e-197	0.57431	0.973	0.745	3.46e-193	cDC2-CLEC10A	TAGLN2
4.76e-196	0.277265	0.467	0.142	6.8e-192	cDC2-CLEC10A	SH3BP5
5.38e-195	0.380442	0.583	0.211	7.7e-191	cDC2-CLEC10A	GTF2B
2.53e-194	0.301932	0.673	0.254	3.63e-190	cDC2-CLEC10A	YIF1B
7.59e-193	0.26044	0.461	0.14	1.09e-188	cDC2-CLEC10A	PDCL3
1.38e-192	0.354118	0.998	0.998	1.97e-188	cDC2-CLEC10A	ACTB
1.3e-191	0.3993	0.333	0.087	1.85e-187	cDC2-CLEC10A	TIPARP
5.18e-191	0.295736	0.996	0.988	7.41e-187	cDC2-CLEC10A	RPL19
9.67e-190	0.701443	0.929	0.595	1.38e-185	cDC2-CLEC10A	HSP90AB1
1.89e-186	0.35067	0.421	0.128	2.71e-182	cDC2-CLEC10A	SNX9
1.95e-186	0.28068	0.999	0.989	2.79e-182	cDC2-CLEC10A	RPS8
1.49e-185	0.276561	0.998	0.983	2.13e-181	cDC2-CLEC10A	RPL18A
8.02e-184	0.454957	0.958	0.711	1.15e-179	cDC2-CLEC10A	SLC25A5
3.85e-183	0.267947	0.62	0.226	5.5e-179	cDC2-CLEC10A	ATXN10
8.19e-182	0.548586	0.693	0.303	1.17e-177	cDC2-CLEC10A	MAT2A
8.5e-182	0.335978	0.504	0.17	1.22e-177	cDC2-CLEC10A	MALT1
9.18e-181	0.329426	0.331	0.089	1.31e-176	cDC2-CLEC10A	TGIF1
3.79e-178	0.461132	0.884	0.496	5.42e-174	cDC2-CLEC10A	CNN2
3.88e-178	0.310258	0.501	0.17	5.56e-174	cDC2-CLEC10A	TUBA1C
5.24e-178	0.328645	0.506	0.172	7.5e-174	cDC2-CLEC10A	EIF4A3
7.86e-178	0.259317	0.511	0.171	1.12e-173	cDC2-CLEC10A	HDAC9
8.82e-178	0.498341	0.922	0.627	1.26e-173	cDC2-CLEC10A	CPVL
5.93e-176	0.363831	0.508	0.179	8.48e-172	cDC2-CLEC10A	PNP
3.42e-175	0.317248	0.328	0.088	4.9e-171	cDC2-CLEC10A	ETV3
5.46e-174	0.273996	0.589	0.217	7.81e-170	cDC2-CLEC10A	CCT2
1.38e-173	0.74375	0.52	0.204	1.97e-169	cDC2-CLEC10A	CHMP1B
1.07e-171	0.279493	0.678	0.271	1.54e-167	cDC2-CLEC10A	ARL5A
9e-168	0.357909	0.831	0.391	1.29e-163	cDC2-CLEC10A	LDHB
2.28e-167	0.251875	0.505	0.174	3.27e-163	cDC2-CLEC10A	IMPDH2
4.96e-166	0.364264	0.992	0.904	7.1e-162	cDC2-CLEC10A	RPL4
2.49e-165	0.261524	0.538	0.191	3.56e-161	cDC2-CLEC10A	HSPB1
6.96e-165	0.31462	0.565	0.213	9.95e-161	cDC2-CLEC10A	ETS2
7.45e-164	0.393241	0.845	0.43	1.07e-159	cDC2-CLEC10A	SRSF2
2.32e-161	0.310136	0.993	0.959	3.33e-157	cDC2-CLEC10A	RACK1
3.05e-161	0.352744	0.289	0.076	4.37e-157	cDC2-CLEC10A	CKS2
1.36e-160	0.258395	0.996	0.985	1.95e-156	cDC2-CLEC10A	RPS15A
1.46e-160	0.261305	0.613	0.238	2.08e-156	cDC2-CLEC10A	ELOVL5
4.96e-160	0.25462	0.374	0.114	7.1e-156	cDC2-CLEC10A	ARID5A
7.31e-159	0.254132	0.136	0.019	1.05e-154	cDC2-CLEC10A	ID3
4.41e-158	0.45684	0.433	0.151	6.31e-154	cDC2-CLEC10A	HSPH1
6.76e-158	0.315654	0.415	0.137	9.67e-154	cDC2-CLEC10A	SERTAD1
1.62e-156	0.284334	0.993	0.959	2.32e-152	cDC2-CLEC10A	RPS16
2.16e-156	0.27837	0.65	0.266	3.08e-152	cDC2-CLEC10A	CNPPD1
3.26e-156	0.413801	0.965	0.79	4.67e-152	cDC2-CLEC10A	MYL12A
4.05e-156	0.601957	0.425	0.15	5.79e-152	cDC2-CLEC10A	IL1B
1.82e-155	0.309109	0.789	0.36	2.6e-151	cDC2-CLEC10A	OSTC
2.52e-155	0.283098	0.99	0.961	3.61e-151	cDC2-CLEC10A	RPS25
4.41e-154	0.379002	0.666	0.291	6.31e-150	cDC2-CLEC10A	CYCS
2.6e-153	0.369837	0.891	0.507	3.72e-149	cDC2-CLEC10A	RGS10
7.47e-153	0.256607	0.996	0.978	1.07e-148	cDC2-CLEC10A	RPL6
1.86e-151	0.375719	0.57	0.228	2.66e-147	cDC2-CLEC10A	NFKB1
2.06e-148	0.326198	0.98	0.9	2.95e-144	cDC2-CLEC10A	BTF3
6.11e-148	0.262888	0.416	0.138	8.74e-144	cDC2-CLEC10A	BHLHE40
4.69e-147	0.416327	0.938	0.604	6.71e-143	cDC2-CLEC10A	SYNGR2
6.67e-147	0.369452	0.982	0.846	9.55e-143	cDC2-CLEC10A	YBX1
1.1e-145	0.278667	0.997	0.983	1.57e-141	cDC2-CLEC10A	RPL8
5.54e-144	0.646589	0.337	0.11	7.92e-140	cDC2-CLEC10A	ATF3
7.78e-144	0.29272	0.763	0.357	1.11e-139	cDC2-CLEC10A	VDAC1
4.17e-143	0.292886	0.987	0.942	5.97e-139	cDC2-CLEC10A	RPL35
1.41e-141	0.542236	0.661	0.329	2.02e-137	cDC2-CLEC10A	NFE2L2
4.69e-141	0.446954	0.998	0.984	6.71e-137	cDC2-CLEC10A	VIM
5.5e-141	0.741537	0.554	0.267	7.87e-137	cDC2-CLEC10A	CDKN1A
1.07e-139	0.277217	0.748	0.342	1.54e-135	cDC2-CLEC10A	FBL
6.14e-138	0.447289	0.559	0.243	8.78e-134	cDC2-CLEC10A	TUBB4B
1.88e-136	0.527002	0.946	0.687	2.7e-132	cDC2-CLEC10A	ANXA1
5.01e-136	0.322542	0.421	0.155	7.17e-132	cDC2-CLEC10A	CSRNP1
1.01e-134	0.350406	0.955	0.677	1.45e-130	cDC2-CLEC10A	SUB1
1.31e-133	0.420473	0.258	0.072	1.88e-129	cDC2-CLEC10A	HBEGF
1.86e-131	0.547923	0.452	0.183	2.66e-127	cDC2-CLEC10A	NR4A1
3.63e-131	0.318047	0.444	0.168	5.19e-127	cDC2-CLEC10A	SKIL
1.5e-130	0.275643	0.761	0.358	2.15e-126	cDC2-CLEC10A	PTRHD1
2.34e-130	0.360831	0.972	0.811	3.35e-126	cDC2-CLEC10A	HNRNPA1
2.93e-130	0.272829	0.581	0.243	4.19e-126	cDC2-CLEC10A	HSPA9
3.81e-130	0.25401	0.68	0.307	5.44e-126	cDC2-CLEC10A	DECR1
3.23e-129	0.269153	0.757	0.359	4.62e-125	cDC2-CLEC10A	SNRPF
8.63e-129	0.294973	0.998	0.985	1.23e-124	cDC2-CLEC10A	RPS27
9.77e-129	0.283365	0.573	0.243	1.4e-124	cDC2-CLEC10A	MTHFD2
1.46e-127	0.294508	0.389	0.138	2.09e-123	cDC2-CLEC10A	ISG20
1.8e-126	0.271541	0.164	0.033	2.58e-122	cDC2-CLEC10A	OSM
1.88e-123	0.252626	0.531	0.22	2.69e-119	cDC2-CLEC10A	ETF1
4.24e-123	0.276268	0.76	0.374	6.07e-119	cDC2-CLEC10A	CAT
5.64e-123	0.340008	0.859	0.478	8.07e-119	cDC2-CLEC10A	ALDH2
2.78e-120	0.323719	0.897	0.519	3.98e-116	cDC2-CLEC10A	RAN
3.11e-119	0.287158	0.995	0.96	4.45e-115	cDC2-CLEC10A	RPS21
1.02e-118	0.50784	0.624	0.31	1.46e-114	cDC2-CLEC10A	SELENOK
2.06e-118	0.271812	0.257	0.076	2.94e-114	cDC2-CLEC10A	SLAMF7
4.37e-118	0.259669	0.994	0.958	6.25e-114	cDC2-CLEC10A	RPL17
6.71e-118	0.352864	0.934	0.644	9.6e-114	cDC2-CLEC10A	ATP5F1B
2.54e-116	0.283131	0.253	0.074	3.63e-112	cDC2-CLEC10A	TWISTNB
8.45e-116	0.347687	0.87	0.518	1.21e-111	cDC2-CLEC10A	LDHA
9.38e-115	0.32351	0.965	0.724	1.34e-110	cDC2-CLEC10A	SLC25A3
1.18e-114	0.307667	0.724	0.37	1.69e-110	cDC2-CLEC10A	PLSCR1
6.56e-114	0.252889	0.758	0.374	9.39e-110	cDC2-CLEC10A	EIF3I
7.78e-114	0.318203	0.892	0.519	1.11e-109	cDC2-CLEC10A	NCL
1.09e-112	0.259098	0.798	0.409	1.56e-108	cDC2-CLEC10A	HNRNPA0
1.28e-112	0.345056	0.558	0.258	1.83e-108	cDC2-CLEC10A	BCL3
5.32e-111	0.445239	0.583	0.276	7.61e-107	cDC2-CLEC10A	GADD45B
2.17e-109	0.407117	0.977	0.901	3.1e-105	cDC2-CLEC10A	RPS29
4.21e-109	0.280136	0.8	0.417	6.03e-105	cDC2-CLEC10A	PAK1
8.82e-108	0.418234	0.228	0.068	1.26e-103	cDC2-CLEC10A	THBD
1.08e-107	0.308995	0.728	0.372	1.55e-103	cDC2-CLEC10A	CD86
8.38e-106	0.512633	0.733	0.408	1.2e-101	cDC2-CLEC10A	DNAJA1
6.99e-105	0.413057	0.755	0.419	1e-100	cDC2-CLEC10A	HERPUD1
2.23e-104	0.331141	0.936	0.653	3.19e-100	cDC2-CLEC10A	GDI2
6.75e-104	0.273352	0.881	0.503	9.66e-100	cDC2-CLEC10A	RAB7A
2.32e-103	0.338803	0.281	0.094	3.32e-99	cDC2-CLEC10A	PAPSS2
3.56e-103	0.710609	0.181	0.047	5.09e-99	cDC2-CLEC10A	CXCL8
1.08e-102	0.308438	0.952	0.687	1.54e-98	cDC2-CLEC10A	SARAF
2.25e-102	0.264407	0.972	0.876	3.22e-98	cDC2-CLEC10A	RPL31
2.31e-102	0.380084	0.904	0.608	3.3e-98	cDC2-CLEC10A	DBI
4.44e-102	0.307155	0.919	0.581	6.35e-98	cDC2-CLEC10A	CTSH
1.4e-101	0.470688	0.346	0.133	2e-97	cDC2-CLEC10A	GLA
1.3e-100	0.334619	0.697	0.367	1.86e-96	cDC2-CLEC10A	ATP2B1
7.32e-99	0.256428	0.785	0.424	1.05e-94	cDC2-CLEC10A	NDUFA12
5.15e-98	0.384666	0.993	0.937	7.37e-94	cDC2-CLEC10A	H3F3B
2.43e-96	0.766488	0.223	0.07	3.48e-92	cDC2-CLEC10A	HSPA1B
2.9e-96	0.26124	0.833	0.469	4.15e-92	cDC2-CLEC10A	GABARAPL2
6.84e-93	0.264983	0.492	0.223	9.79e-89	cDC2-CLEC10A	PIM3
1.41e-92	0.345069	0.5	0.232	2.02e-88	cDC2-CLEC10A	MARCKSL1
3.6e-91	0.288154	0.885	0.572	5.16e-87	cDC2-CLEC10A	ATP5F1A
1.08e-90	0.261422	0.981	0.887	1.55e-86	cDC2-CLEC10A	LSP1
7.39e-90	0.580531	0.458	0.206	1.06e-85	cDC2-CLEC10A	DNAJB1
2.41e-87	0.301604	0.958	0.739	3.45e-83	cDC2-CLEC10A	ANXA5
8.09e-86	0.254081	0.358	0.149	1.16e-81	cDC2-CLEC10A	ARL4A
1.25e-84	0.335214	0.537	0.272	1.79e-80	cDC2-CLEC10A	CXCL16
3.41e-84	0.28547	0.828	0.491	4.88e-80	cDC2-CLEC10A	MT-ND6
5.4e-82	0.268937	0.958	0.826	7.72e-78	cDC2-CLEC10A	RPL27A
1.31e-81	0.263831	0.773	0.424	1.87e-77	cDC2-CLEC10A	SRSF7
6.39e-77	0.311247	0.798	0.478	9.15e-73	cDC2-CLEC10A	CALR
1.52e-76	0.301793	0.985	0.911	2.17e-72	cDC2-CLEC10A	MT-ATP8
6.01e-76	0.262487	0.947	0.724	8.6e-72	cDC2-CLEC10A	EIF3F
7.28e-76	0.357025	0.446	0.226	1.04e-71	cDC2-CLEC10A	KDM6B
5.68e-75	0.301316	0.968	0.815	8.13e-71	cDC2-CLEC10A	SAMHD1
2.17e-74	0.252167	0.906	0.603	3.11e-70	cDC2-CLEC10A	RNH1
4.12e-74	0.265941	0.92	0.638	5.89e-70	cDC2-CLEC10A	ATP5MC3
6.88e-73	0.38881	0.619	0.345	9.84e-69	cDC2-CLEC10A	KLF4
1.28e-68	0.464904	0.21	0.077	1.83e-64	cDC2-CLEC10A	G0S2
3.47e-67	0.4787	0.941	0.697	4.97e-63	cDC2-CLEC10A	HSP90AA1
4.58e-63	0.358138	0.711	0.441	6.55e-59	cDC2-CLEC10A	MYADM
8.43e-57	0.270046	0.801	0.502	1.21e-52	cDC2-CLEC10A	REL
1.18e-56	0.444152	0.563	0.339	1.69e-52	cDC2-CLEC10A	ATP1B3
1.8e-50	0.513397	0.965	0.853	2.58e-46	cDC2-CLEC10A	UBC
1.16e-46	0.525036	0.932	0.705	1.67e-42	cDC2-CLEC10A	TIMP1
3.42e-42	0.551159	0.607	0.433	4.9e-38	cDC2-CLEC10A	PLAUR
6.92e-39	0.310028	0.461	0.282	9.9e-35	cDC2-CLEC10A	SLC2A3
1.84e-36	0.31657	0.612	0.413	2.63e-32	cDC2-CLEC10A	PPP1R15A
1.56e-34	0.570197	0.367	0.229	2.24e-30	cDC2-CLEC10A	SGK1
5.39e-33	0.458145	0.985	0.945	7.72e-29	cDC2-CLEC10A	SRGN
5.47e-21	0.918769	0.44	0.311	7.83e-17	cDC2-CLEC10A	HSPA1A
4.59e-12	0.300765	0.783	0.602	6.57e-08	cDC2-CLEC10A	SQSTM1
6.71e-09	0.279118	0.249	0.176	9.6e-05	cDC2-CLEC10A	JUN
0	3.18162	1	0.005	0	cDC2-LAMP3	LAMP3
0	2.9327	0.889	0.001	0	cDC2-LAMP3	CCL19
0	2.26874	0.778	0.002	0	cDC2-LAMP3	UBD
0	1.39552	0.778	0.002	0	cDC2-LAMP3	SLCO5A1
0	0.811423	0.556	0.002	0	cDC2-LAMP3	CD200
0	0.759024	0.667	0.001	0	cDC2-LAMP3	ANO9
0	0.458921	0.444	0.001	0	cDC2-LAMP3	TMEM136
2.58e-294	1.27447	0.778	0.004	3.69e-290	cDC2-LAMP3	ANKRD33B
7.79e-247	0.449886	0.444	0.001	1.11e-242	cDC2-LAMP3	AC120193.1
1.36e-246	0.355326	0.444	0.001	1.94e-242	cDC2-LAMP3	DEPP1
2.41e-241	0.753861	0.667	0.003	3.44e-237	cDC2-LAMP3	CD274
1.55e-219	0.417761	0.444	0.002	2.21e-215	cDC2-LAMP3	HMSD
3.42e-215	0.679833	0.444	0.002	4.9e-211	cDC2-LAMP3	BCL2L14
7.55e-181	1.46938	0.778	0.006	1.08e-176	cDC2-LAMP3	TVP23A
7.23e-180	0.422566	0.444	0.002	1.03e-175	cDC2-LAMP3	SLC22A23
8.68e-147	2.70474	0.556	0.004	1.24e-142	cDC2-LAMP3	CCL22
1.6e-139	0.326612	0.333	0.001	2.28e-135	cDC2-LAMP3	KHDRBS3
4.87e-133	1.01086	0.556	0.004	6.97e-129	cDC2-LAMP3	CD80
5.22e-116	0.83154	0.556	0.005	7.47e-112	cDC2-LAMP3	TNFRSF11A
6.69e-116	1.03568	0.556	0.005	9.58e-112	cDC2-LAMP3	MREG
8.64e-100	1.55567	0.889	0.015	1.24e-95	cDC2-LAMP3	NRP2
5.41e-96	1.12989	0.444	0.004	7.74e-92	cDC2-LAMP3	FBXO27
2.5e-92	2.44659	0.889	0.017	3.57e-88	cDC2-LAMP3	IDO1
3.24e-90	1.64567	0.889	0.017	4.63e-86	cDC2-LAMP3	DUSP4
2.18e-87	2.31125	0.667	0.01	3.12e-83	cDC2-LAMP3	EBI3
5.36e-85	0.518435	0.444	0.004	7.67e-81	cDC2-LAMP3	PSD3
1.03e-81	3.90092	0.889	0.019	1.47e-77	cDC2-LAMP3	CCR7
1.28e-79	1.22733	0.889	0.02	1.84e-75	cDC2-LAMP3	TRIP10
3.8e-78	0.506105	0.556	0.008	5.44e-74	cDC2-LAMP3	SPRED2
1.29e-69	0.503446	0.444	0.005	1.85e-65	cDC2-LAMP3	FRMD4A
2.01e-68	1.37341	0.556	0.009	2.88e-64	cDC2-LAMP3	CD1B
6.2e-68	0.30205	0.222	0.001	8.86e-64	cDC2-LAMP3	DNAI2
2.17e-67	0.251902	0.333	0.003	3.11e-63	cDC2-LAMP3	JADE3
1.57e-66	1.04005	0.778	0.018	2.25e-62	cDC2-LAMP3	APOC1
2.96e-66	0.769189	0.556	0.009	4.24e-62	cDC2-LAMP3	GCSAM
3.31e-63	3.229	1	0.033	4.74e-59	cDC2-LAMP3	FSCN1
5.47e-61	0.319399	0.333	0.003	7.82e-57	cDC2-LAMP3	LINC02397
8.41e-58	1.01931	0.667	0.015	1.2e-53	cDC2-LAMP3	AKAP2
2.73e-57	1.92456	1	0.036	3.9e-53	cDC2-LAMP3	TRAF1
2.32e-56	0.445873	0.444	0.007	3.32e-52	cDC2-LAMP3	CCR6
8.02e-56	0.414183	0.444	0.007	1.15e-51	cDC2-LAMP3	ARNTL2
4.65e-55	0.759472	0.667	0.016	6.65e-51	cDC2-LAMP3	P2RY10
1.08e-54	0.277549	0.222	0.002	1.54e-50	cDC2-LAMP3	HCN3
2.38e-51	0.825649	0.444	0.007	3.41e-47	cDC2-LAMP3	TNFRSF9
1.74e-49	0.300966	0.222	0.002	2.49e-45	cDC2-LAMP3	AC124319.2
4.94e-49	1.76047	0.667	0.018	7.07e-45	cDC2-LAMP3	MIR155HG
5.01e-49	2.4625	0.889	0.033	7.17e-45	cDC2-LAMP3	CD1E
1.32e-48	2.31313	0.889	0.033	1.88e-44	cDC2-LAMP3	IL7R
3.54e-48	0.250156	0.333	0.004	5.06e-44	cDC2-LAMP3	MUC12
4.51e-48	0.70816	0.333	0.005	6.45e-44	cDC2-LAMP3	TNFRSF4
1.26e-47	1.17731	1	0.042	1.8e-43	cDC2-LAMP3	MAFF
6.89e-47	0.350528	0.222	0.002	9.87e-43	cDC2-LAMP3	GPR31
1.75e-46	1.6179	0.778	0.026	2.51e-42	cDC2-LAMP3	GPR157
7.68e-46	2.42518	0.889	0.035	1.1e-41	cDC2-LAMP3	RGS1
5.23e-45	1.44506	0.889	0.035	7.48e-41	cDC2-LAMP3	TBC1D4
8.7e-44	0.657252	0.444	0.009	1.24e-39	cDC2-LAMP3	RAMP1
1.04e-43	0.415769	0.222	0.002	1.49e-39	cDC2-LAMP3	SYNPO2
3.25e-43	0.30273	0.333	0.005	4.65e-39	cDC2-LAMP3	CXCL9
1.83e-40	1.42561	1	0.052	2.62e-36	cDC2-LAMP3	CLIC2
4.5e-39	1.22238	0.333	0.006	6.43e-35	cDC2-LAMP3	S1PR1
8.13e-39	0.399633	0.444	0.01	1.16e-34	cDC2-LAMP3	RASGRP3
1.59e-38	1.65667	0.333	0.006	2.27e-34	cDC2-LAMP3	ENO3
1.92e-38	0.864256	0.333	0.006	2.75e-34	cDC2-LAMP3	RRAD
2.65e-38	0.507418	0.444	0.01	3.79e-34	cDC2-LAMP3	RAB30
5.34e-38	0.49326	0.222	0.003	7.63e-34	cDC2-LAMP3	ULBP2
7.4e-36	0.566112	0.667	0.024	1.06e-31	cDC2-LAMP3	TRAF5
3.95e-33	1.48437	0.889	0.049	5.65e-29	cDC2-LAMP3	NECTIN2
1.25e-31	0.825084	0.556	0.019	1.79e-27	cDC2-LAMP3	JAG1
3.51e-31	1.07261	0.778	0.038	5.03e-27	cDC2-LAMP3	ARHGAP10
3.19e-30	0.603845	0.444	0.013	4.56e-26	cDC2-LAMP3	ADORA2A
3.52e-30	0.589468	0.222	0.003	5.04e-26	cDC2-LAMP3	LIMCH1
1.65e-29	0.481612	0.556	0.02	2.35e-25	cDC2-LAMP3	ZNF260
2.32e-29	0.371089	0.444	0.013	3.33e-25	cDC2-LAMP3	FAM69A
2.81e-29	0.379526	0.444	0.013	4.03e-25	cDC2-LAMP3	C1orf21
7.49e-29	1.09602	0.333	0.008	1.07e-24	cDC2-LAMP3	LINC01857
7.4e-28	0.299003	0.222	0.004	1.06e-23	cDC2-LAMP3	ATP1A4
6.49e-27	2.14921	0.778	0.044	9.28e-23	cDC2-LAMP3	C15orf48
4.6e-26	0.638556	0.556	0.023	6.58e-22	cDC2-LAMP3	HLA-DOB
8.81e-26	0.276405	0.444	0.015	1.26e-21	cDC2-LAMP3	AUTS2
1.03e-25	1.68659	1	0.083	1.47e-21	cDC2-LAMP3	CD40
1.16e-25	0.38279	0.444	0.015	1.66e-21	cDC2-LAMP3	PLCL1
3.87e-25	1.5134	0.889	0.067	5.54e-21	cDC2-LAMP3	POGLUT1
5.22e-25	0.333523	0.222	0.004	7.47e-21	cDC2-LAMP3	AC015712.2
1.04e-24	0.531274	0.667	0.034	1.49e-20	cDC2-LAMP3	SPIB
1.4e-24	0.579892	0.222	0.004	2.01e-20	cDC2-LAMP3	TSPAN15
3.44e-24	1.12494	0.667	0.037	4.93e-20	cDC2-LAMP3	IL4I1
6.92e-24	0.479985	0.444	0.016	9.9e-20	cDC2-LAMP3	FILIP1L
7.6e-24	0.351877	0.222	0.004	1.09e-19	cDC2-LAMP3	DNM1
2.28e-23	1.68871	0.889	0.069	3.27e-19	cDC2-LAMP3	TUBB6
3.88e-23	1.70283	0.778	0.053	5.55e-19	cDC2-LAMP3	CST7
1.96e-22	0.864287	0.667	0.039	2.8e-18	cDC2-LAMP3	BTG3
3.47e-22	1.61476	1	0.101	4.97e-18	cDC2-LAMP3	GPR137B
2.05e-21	0.387354	0.333	0.01	2.93e-17	cDC2-LAMP3	BTLA
5.45e-21	0.618572	0.667	0.04	7.8e-17	cDC2-LAMP3	MMD
4.24e-20	1.74633	0.889	0.086	6.06e-16	cDC2-LAMP3	MGLL
6.04e-20	1.07639	0.556	0.031	8.64e-16	cDC2-LAMP3	NET1
8.97e-20	0.314123	0.444	0.019	1.28e-15	cDC2-LAMP3	ZNF235
1.65e-19	0.386735	0.111	0.001	2.36e-15	cDC2-LAMP3	PERP
4.94e-19	0.387034	0.444	0.02	7.07e-15	cDC2-LAMP3	ZC3H12D
6.41e-19	0.553529	0.556	0.031	9.17e-15	cDC2-LAMP3	PSEN2
8.26e-19	1.20862	0.333	0.012	1.18e-14	cDC2-LAMP3	SLC7A11
9.24e-19	1.45076	0.778	0.063	1.32e-14	cDC2-LAMP3	NR4A3
9.33e-19	0.662931	0.556	0.032	1.34e-14	cDC2-LAMP3	ARHGAP22
4.23e-18	0.672344	0.667	0.047	6.05e-14	cDC2-LAMP3	CLIP2
4.44e-18	1.02637	0.889	0.086	6.36e-14	cDC2-LAMP3	HLA-DQA2
4.94e-18	0.613043	0.222	0.006	7.07e-14	cDC2-LAMP3	ELOVL7
5.27e-18	0.791065	0.444	0.022	7.55e-14	cDC2-LAMP3	TUBB2A
6.95e-18	0.29393	0.222	0.006	9.95e-14	cDC2-LAMP3	DUSP16
1.09e-17	0.726273	0.444	0.022	1.55e-13	cDC2-LAMP3	ABCC4
2.93e-17	3.18187	1	0.134	4.2e-13	cDC2-LAMP3	BIRC3
3.9e-17	1.71719	1	0.13	5.58e-13	cDC2-LAMP3	KDM2B
5.04e-17	0.724928	0.667	0.052	7.21e-13	cDC2-LAMP3	TOMM34
9.28e-17	0.40704	0.111	0.002	1.33e-12	cDC2-LAMP3	RND1
9.37e-17	0.271695	0.222	0.006	1.34e-12	cDC2-LAMP3	DNAJC5B
2.82e-16	1.20733	0.778	0.077	4.04e-12	cDC2-LAMP3	LY75
4.78e-16	0.514048	0.333	0.014	6.84e-12	cDC2-LAMP3	ZEB1
7.82e-16	0.823229	0.667	0.054	1.12e-11	cDC2-LAMP3	SERPINF1
8.09e-16	0.76187	0.444	0.025	1.16e-11	cDC2-LAMP3	TIFAB
1.09e-15	0.473881	0.444	0.025	1.55e-11	cDC2-LAMP3	FADS2
1.14e-15	0.269002	0.111	0.002	1.63e-11	cDC2-LAMP3	EFNB2
1.31e-15	0.724405	0.778	0.075	1.87e-11	cDC2-LAMP3	BET1
1.69e-15	0.582281	0.667	0.055	2.42e-11	cDC2-LAMP3	PIM2
1.85e-15	0.403661	0.333	0.015	2.65e-11	cDC2-LAMP3	ZNF366
2.37e-15	1.04627	0.222	0.007	3.38e-11	cDC2-LAMP3	INHBA
4.52e-15	0.413817	0.333	0.015	6.47e-11	cDC2-LAMP3	PXDC1
8.37e-15	0.498554	0.444	0.026	1.2e-10	cDC2-LAMP3	TSPAN13
2.1e-14	0.689647	0.333	0.016	3e-10	cDC2-LAMP3	ZC3H12C
6.77e-14	0.456037	0.333	0.016	9.68e-10	cDC2-LAMP3	GEM
6.87e-14	0.318805	0.222	0.007	9.83e-10	cDC2-LAMP3	HELLS
8.46e-14	0.431316	0.333	0.016	1.21e-09	cDC2-LAMP3	SOCS1
1.16e-13	0.512753	0.556	0.044	1.66e-09	cDC2-LAMP3	HLA-DQB2
1.79e-13	0.778332	0.667	0.064	2.56e-09	cDC2-LAMP3	CYP2S1
1.84e-13	0.868766	0.778	0.089	2.63e-09	cDC2-LAMP3	MAP3K13
1.87e-13	0.260838	0.222	0.008	2.68e-09	cDC2-LAMP3	NCR3LG1
1.98e-13	0.524336	0.222	0.008	2.83e-09	cDC2-LAMP3	ENPP2
2.43e-13	0.348839	0.222	0.008	3.48e-09	cDC2-LAMP3	AL138899.1
2.98e-13	0.326617	0.333	0.017	4.26e-09	cDC2-LAMP3	AL139260.1
3.09e-13	0.430793	0.444	0.03	4.42e-09	cDC2-LAMP3	MCOLN2
3.43e-13	0.307936	0.222	0.008	4.91e-09	cDC2-LAMP3	TREM2
3.85e-13	0.717515	0.778	0.085	5.5e-09	cDC2-LAMP3	SLAMF7
4.95e-13	0.271003	0.222	0.008	7.08e-09	cDC2-LAMP3	EPAS1
5.08e-13	1.74216	0.889	0.133	7.27e-09	cDC2-LAMP3	NR4A2
5.33e-13	1.7485	0.556	0.05	7.62e-09	cDC2-LAMP3	IL32
6.43e-13	0.449407	0.444	0.03	9.2e-09	cDC2-LAMP3	CCDC28B
7.13e-13	1.51086	0.889	0.144	1.02e-08	cDC2-LAMP3	KIF2A
9.99e-13	3.24336	1	0.198	1.43e-08	cDC2-LAMP3	CD83
1.67e-12	0.871772	0.778	0.095	2.39e-08	cDC2-LAMP3	USP12
2.01e-12	1.67168	0.889	0.126	2.88e-08	cDC2-LAMP3	DUSP5
2.36e-12	0.265032	0.444	0.031	3.38e-08	cDC2-LAMP3	PHLDB3
2.67e-12	2.64548	0.778	0.105	3.82e-08	cDC2-LAMP3	GPR183
3.26e-12	1.12779	0.556	0.051	4.66e-08	cDC2-LAMP3	NMRK1
4.84e-12	0.787544	0.889	0.125	6.92e-08	cDC2-LAMP3	IL2RG
6.46e-12	0.579585	0.444	0.034	9.24e-08	cDC2-LAMP3	ZBTB10
8.61e-12	2.0073	1	0.219	1.23e-07	cDC2-LAMP3	BASP1
9.06e-12	0.271275	0.333	0.019	1.3e-07	cDC2-LAMP3	KCNMA1
1e-11	0.451236	0.444	0.034	1.44e-07	cDC2-LAMP3	BCL2
1.25e-11	0.970308	0.889	0.139	1.79e-07	cDC2-LAMP3	RAB29
1.38e-11	1.23382	1	0.199	1.97e-07	cDC2-LAMP3	NFKB2
1.38e-11	1.78472	1	0.229	1.98e-07	cDC2-LAMP3	NUB1
1.68e-11	0.479322	0.333	0.02	2.4e-07	cDC2-LAMP3	BPHL
2.45e-11	0.686542	0.556	0.055	3.51e-07	cDC2-LAMP3	GRASP
2.69e-11	1.18828	0.889	0.146	3.85e-07	cDC2-LAMP3	RFTN1
2.91e-11	0.874686	0.778	0.1	4.16e-07	cDC2-LAMP3	F11R
3.03e-11	3.01824	1	0.246	4.34e-07	cDC2-LAMP3	MARCKSL1
3.16e-11	0.368599	0.556	0.051	4.52e-07	cDC2-LAMP3	GABPB1
3.7e-11	0.546003	0.444	0.035	5.29e-07	cDC2-LAMP3	PKIB
4.26e-11	2.22982	1	0.266	6.09e-07	cDC2-LAMP3	GSN
4.68e-11	0.745232	0.667	0.079	6.69e-07	cDC2-LAMP3	ARL5B
5.54e-11	0.423189	0.222	0.01	7.93e-07	cDC2-LAMP3	MELTF
8.68e-11	0.41655	0.444	0.037	1.24e-06	cDC2-LAMP3	CTTNBP2NL
9.59e-11	0.98194	0.556	0.054	1.37e-06	cDC2-LAMP3	CXCL8
1.2e-10	0.317816	0.444	0.036	1.72e-06	cDC2-LAMP3	RAB3IP
1.52e-10	0.797697	0.778	0.111	2.18e-06	cDC2-LAMP3	SINHCAF
1.65e-10	2.39919	1	0.283	2.37e-06	cDC2-LAMP3	CDKN1A
1.73e-10	1.49106	0.667	0.084	2.47e-06	cDC2-LAMP3	G0S2
2.05e-10	0.505325	0.556	0.058	2.93e-06	cDC2-LAMP3	GNG7
2.19e-10	0.545888	0.667	0.079	3.13e-06	cDC2-LAMP3	SLC25A29
2.23e-10	0.267811	0.222	0.01	3.19e-06	cDC2-LAMP3	ZNF519
2.49e-10	0.979822	0.889	0.153	3.56e-06	cDC2-LAMP3	BHLHE40
3.13e-10	1.00413	0.889	0.158	4.48e-06	cDC2-LAMP3	RAB9A
3.61e-10	1.88119	0.778	0.122	5.17e-06	cDC2-LAMP3	ATF3
4.16e-10	0.305714	0.333	0.023	5.95e-06	cDC2-LAMP3	AC011603.2
5.32e-10	0.367362	0.222	0.011	7.61e-06	cDC2-LAMP3	MMP2-AS1
6.17e-10	0.520456	0.444	0.039	8.83e-06	cDC2-LAMP3	SLC7A1
8.23e-10	0.912575	0.778	0.123	1.18e-05	cDC2-LAMP3	REPIN1
8.45e-10	0.628395	0.556	0.062	1.21e-05	cDC2-LAMP3	TMEM39A
9.74e-10	0.749986	0.667	0.089	1.39e-05	cDC2-LAMP3	GPR132
1.29e-09	0.391038	0.556	0.06	1.85e-05	cDC2-LAMP3	THAP2
1.32e-09	1.37476	1	0.247	1.88e-05	cDC2-LAMP3	NFKB1
1.39e-09	1.27989	1	0.275	1.99e-05	cDC2-LAMP3	RELB
1.4e-09	1.15702	0.889	0.177	2.01e-05	cDC2-LAMP3	RALA
1.47e-09	0.383903	0.222	0.011	2.1e-05	cDC2-LAMP3	MB21D2
1.5e-09	0.322884	0.556	0.06	2.15e-05	cDC2-LAMP3	2021-09-11
1.58e-09	0.553611	0.778	0.113	2.26e-05	cDC2-LAMP3	IL15
2.14e-09	1.06488	0.667	0.101	3.06e-05	cDC2-LAMP3	ETV3
2.91e-09	0.32133	0.556	0.061	4.17e-05	cDC2-LAMP3	C17orf49
3.19e-09	0.345172	0.444	0.042	4.57e-05	cDC2-LAMP3	TICAM2
3.25e-09	1.50087	0.889	0.198	4.65e-05	cDC2-LAMP3	NR4A1
3.4e-09	1.29566	1	0.238	4.86e-05	cDC2-LAMP3	PIM3
3.63e-09	0.379928	0.444	0.043	5.2e-05	cDC2-LAMP3	CEP68
3.97e-09	1.06502	1	0.246	5.68e-05	cDC2-LAMP3	RAB8B
4.58e-09	1.25619	1	0.276	6.55e-05	cDC2-LAMP3	DAPP1
5.43e-09	1.31513	0.333	0.027	7.76e-05	cDC2-LAMP3	PDE6G
6.04e-09	0.376756	0.556	0.064	8.64e-05	cDC2-LAMP3	C1orf54
6.05e-09	1.04456	0.556	0.07	8.66e-05	cDC2-LAMP3	FLT3
6.52e-09	0.840789	0.778	0.127	9.34e-05	cDC2-LAMP3	PPP1R15B
6.68e-09	0.981532	0.889	0.176	9.56e-05	cDC2-LAMP3	FAM129A
7.29e-09	1.10768	0.889	0.189	0.000104	cDC2-LAMP3	MALT1
8.19e-09	0.542216	0.556	0.067	0.000117	cDC2-LAMP3	CHST7
8.72e-09	0.299961	0.556	0.064	0.000125	cDC2-LAMP3	EED
9.64e-09	0.935637	0.667	0.102	0.000138	cDC2-LAMP3	TGIF1
1.12e-08	0.644376	0.556	0.07	0.000161	cDC2-LAMP3	BTN2A2
1.44e-08	0.690596	0.778	0.132	0.000206	cDC2-LAMP3	CERS6
1.54e-08	0.527709	0.556	0.068	0.000219943	cDC2-LAMP3	GFPT1
2.19e-08	0.973416	0.667	0.099	0.000314	cDC2-LAMP3	H6PD
2.3e-08	1.5817	1	0.311	0.000329	cDC2-LAMP3	PPA1
2.79e-08	0.619293	0.889	0.169	0.0004	cDC2-LAMP3	CLPTM1
2.81e-08	0.833031	0.889	0.175	0.000402	cDC2-LAMP3	PPP1R10
3.07e-08	0.836342	0.778	0.144	0.00044	cDC2-LAMP3	SNX9
3.1e-08	0.878993	0.556	0.077	0.000443	cDC2-LAMP3	H2AFX
3.37e-08	1.01839	0.889	0.21	0.000482	cDC2-LAMP3	HSPB1
3.37e-08	0.277364	0.556	0.067	0.000482	cDC2-LAMP3	FOXO1
4.1e-08	0.432318	0.778	0.123	0.000586	cDC2-LAMP3	SOCS3
4.12e-08	0.386022	0.444	0.047	0.000589	cDC2-LAMP3	NETO2
5.4e-08	0.395833	0.333	0.029	0.000773	cDC2-LAMP3	DNAJB4
5.53e-08	0.758185	0.778	0.146	0.000791	cDC2-LAMP3	GLS
6.25e-08	3.60005	1	0.539	0.000894	cDC2-LAMP3	TXN
6.34e-08	0.9564	0.667	0.112	0.000907	cDC2-LAMP3	RASGEF1B
6.68e-08	0.619177	0.556	0.073	0.000955	cDC2-LAMP3	CEP135
6.77e-08	0.926763	0.889	0.204	0.000968	cDC2-LAMP3	TBC1D8
7.68e-08	0.432184	0.444	0.05	0.00109842	cDC2-LAMP3	TTF2
8.5e-08	1.64374	1	0.321	0.00121679	cDC2-LAMP3	RASSF4
8.84e-08	2.2044	1	0.47	0.00126451	cDC2-LAMP3	HLA-DQA1
8.96e-08	0.851054	0.556	0.082	0.00128261	cDC2-LAMP3	NUAK2
9.1e-08	0.344353	0.333	0.029	0.00130261	cDC2-LAMP3	ICOSLG
9.55e-08	0.527616	0.667	0.105	0.00136706	cDC2-LAMP3	RDX
9.78e-08	0.418602	0.333	0.03	0.00139986	cDC2-LAMP3	OPTN
1.35e-07	1.16445	0.556	0.084	0.001932	cDC2-LAMP3	CYB5A
1.45e-07	0.274093	0.222	0.014	0.00207676	cDC2-LAMP3	SEMA7A
1.52e-07	0.437863	0.667	0.103	0.00217157	cDC2-LAMP3	MBNL2
1.53e-07	0.260265	0.333	0.03	0.0021918	cDC2-LAMP3	KCTD9
1.7e-07	1.0049	0.889	0.207	0.00242675	cDC2-LAMP3	TNFAIP3
1.83e-07	1.34508	0.778	0.183	0.00262474	cDC2-LAMP3	ICAM1
1.99e-07	0.305819	0.444	0.051	0.00285326	cDC2-LAMP3	TDRD7
2.15e-07	1.16706	0.778	0.185	0.00307988	cDC2-LAMP3	VOPP1
2.29e-07	1.30241	1	0.421	0.00327279	cDC2-LAMP3	LITAF
2.48e-07	0.472	0.222	0.015	0.00354258	cDC2-LAMP3	H2AFY2
2.91e-07	0.651268	0.556	0.082	0.00416147	cDC2-LAMP3	HLA-DOA
2.96e-07	0.421534	0.444	0.054	0.00423986	cDC2-LAMP3	IRF4
3.06e-07	0.655613	0.556	0.088	0.00438335	cDC2-LAMP3	VAC14
3.26e-07	0.356686	0.444	0.054	0.00466257	cDC2-LAMP3	TSPAN33
3.45e-07	0.341844	0.556	0.079	0.00493618	cDC2-LAMP3	UGCG
3.5e-07	0.653829	0.778	0.157	0.0050117	cDC2-LAMP3	NDE1
3.7e-07	0.620275	0.778	0.152	0.00529334	cDC2-LAMP3	MAP4
3.9e-07	0.279469	0.222	0.015	0.00557898	cDC2-LAMP3	LRRC61
3.99e-07	0.804807	0.889	0.214	0.0057069	cDC2-LAMP3	GNA13
4.23e-07	0.573286	0.556	0.085	0.00604604	cDC2-LAMP3	ALCAM
4.51e-07	1.09021	0.778	0.173	0.00644952	cDC2-LAMP3	DOCK10
4.71e-07	0.334474	0.333	0.033	0.00673582	cDC2-LAMP3	ORMDL3
4.83e-07	1.51239	1	0.622	0.00691651	cDC2-LAMP3	SYNGR2
5.14e-07	2.68678	0.778	0.222	0.00735411	cDC2-LAMP3	CXCR4
5.48e-07	0.871987	0.889	0.224	0.0078407	cDC2-LAMP3	SIAH2
6.22e-07	1.4686	1	0.489	0.00890546	cDC2-LAMP3	GABARAPL2
6.54e-07	0.995769	0.778	0.162	0.00935875	cDC2-LAMP3	TOR3A
6.8e-07	0.294969	0.222	0.016	0.00973513	cDC2-LAMP3	CDK2
7.31e-07	1.717	1	0.64	0.0104555	cDC2-LAMP3	HLA-DQB1
7.38e-07	1.78752	1	0.927	0.0105558	cDC2-LAMP3	HLA-DRA
8.64e-07	1.04833	1	0.335	0.0123567	cDC2-LAMP3	FAM49A
1.08e-06	0.85242	0.444	0.063	0.0154194	cDC2-LAMP3	ZC3H12A
1.08e-06	1.21233	0.889	0.235	0.0154878	cDC2-LAMP3	SAMSN1
1.14e-06	0.443328	0.222	0.017	0.0162556	cDC2-LAMP3	DHRS3
1.14e-06	0.443959	0.667	0.12	0.0163652	cDC2-LAMP3	AFF1
1.25e-06	0.65051	0.556	0.088	0.0178148	cDC2-LAMP3	DNAJB9
1.37e-06	0.499533	0.667	0.123	0.0196714	cDC2-LAMP3	NEK6
1.38e-06	1.38344	1	0.385	0.0198114	cDC2-LAMP3	MARCKS
1.42e-06	0.584076	0.667	0.128	0.0203362	cDC2-LAMP3	DENND4A
1.79e-06	2.06303	0.889	0.354	0.0255818	cDC2-LAMP3	ID2
1.79e-06	0.76885	0.667	0.133	0.0255926	cDC2-LAMP3	ANTXR2
2.01e-06	1.56553	1	0.99	0.0287636	cDC2-LAMP3	CD74
2.01e-06	1.02456	0.889	0.238	0.0288199	cDC2-LAMP3	KDM6B
2.07e-06	0.937226	0.556	0.088	0.0295521	cDC2-LAMP3	CKS2
2.1e-06	0.743802	0.222	0.017	0.0299991	cDC2-LAMP3	CXCL10
2.16e-06	0.414474	0.444	0.059	0.0308918	cDC2-LAMP3	AC025164.1
2.3e-06	0.661567	0.778	0.179	0.0329385	cDC2-LAMP3	N4BP2L1
2.42e-06	1.1443	0.778	0.236	0.0345764	cDC2-LAMP3	PTPN1
2.42e-06	0.690232	0.667	0.141	0.0345969	cDC2-LAMP3	TFG
2.56e-06	1.94852	1	0.774	0.036645	cDC2-LAMP3	BTG1
2.82e-06	1.39038	1	0.859	0.0402877	cDC2-LAMP3	UBC
2.9e-06	0.314521	0.444	0.061	0.041447	cDC2-LAMP3	RAP2A
3.39e-06	0.913072	0.889	0.262	0.0484521	cDC2-LAMP3	PEA15
3.41e-06	0.433122	0.556	0.091	0.0487912	cDC2-LAMP3	ASMTL
3.44e-06	1.23942	0.889	0.287	0.0492866	cDC2-LAMP3	CSF2RA
3.48e-06	1.33492	0.889	0.274	0.0498172	cDC2-LAMP3	BCL3
3.49e-06	0.822228	0.889	0.259	0.049882	cDC2-LAMP3	LRRFIP2
3.5e-06	0.262301	0.444	0.061	0.0501146	cDC2-LAMP3	ATP1B1
3.73e-06	1.78555	1	0.777	0.053439	cDC2-LAMP3	HLA-DPB1
3.76e-06	0.577921	0.444	0.066	0.0538691	cDC2-LAMP3	CASP7
4.1e-06	1.14987	1	0.78	0.0586272	cDC2-LAMP3	GPX4
4.17e-06	1.59614	1	0.471	0.0596071	cDC2-LAMP3	RPS27L
4.34e-06	1.3472	1	0.912	0.0621518	cDC2-LAMP3	HLA-DRB1
4.36e-06	0.533612	0.556	0.103	0.0623847	cDC2-LAMP3	RFX5
4.72e-06	0.492464	0.556	0.096	0.0674764	cDC2-LAMP3	PPM1K
4.96e-06	1.29817	0.889	0.266	0.0709356	cDC2-LAMP3	ANXA6
5.08e-06	0.888654	1	0.998	0.0726555	cDC2-LAMP3	B2M
5.11e-06	1.53066	0.889	0.295	0.0730719	cDC2-LAMP3	GRSF1
5.23e-06	0.358354	0.333	0.039	0.0748462	cDC2-LAMP3	NAV1
5.97e-06	0.743881	0.778	0.183	0.0853477	cDC2-LAMP3	SKIL
6.67e-06	1.12967	1	0.429	0.0953925	cDC2-LAMP3	VDAC2
6.96e-06	0.430834	0.444	0.069	0.0996506	cDC2-LAMP3	ACAT2
7.33e-06	1.4435	1	0.819	0.104919	cDC2-LAMP3	HLA-DPA1
7.46e-06	1.27512	1	0.426	0.10676	cDC2-LAMP3	DNAJA1
7.99e-06	3.17495	0.667	0.188	0.114264	cDC2-LAMP3	TUBA1C
8.05e-06	0.280128	0.556	0.093	0.115247	cDC2-LAMP3	KYAT3
8.72e-06	0.412423	0.444	0.069	0.124755	cDC2-LAMP3	CLECL1
9.02e-06	0.289335	0.333	0.04	0.129048	cDC2-LAMP3	SC5D
1.06e-05	0.964295	0.667	0.166	0.15108	cDC2-LAMP3	RHOF
1.09e-05	1.37814	1	0.892	0.155274	cDC2-LAMP3	LSP1
1.12e-05	0.968903	1	0.413	0.160128	cDC2-LAMP3	FNBP1
1.32e-05	0.414784	0.444	0.069	0.188408	cDC2-LAMP3	ZNF331
1.37e-05	0.97672	0.778	0.207	0.195748	cDC2-LAMP3	ST8SIA4
1.41e-05	0.255507	0.444	0.067	0.201905	cDC2-LAMP3	MED21
1.48e-05	0.408617	0.556	0.103	0.212388	cDC2-LAMP3	TP53BP2
1.6e-05	1.28432	1	0.459	0.228937	cDC2-LAMP3	STK4
1.61e-05	0.721908	0.667	0.17	0.230224	cDC2-LAMP3	CSRNP1
1.62e-05	0.335086	0.667	0.134	0.231832	cDC2-LAMP3	NCK1
1.85e-05	1.56479	0.889	0.372	0.264717	cDC2-LAMP3	BCL2A1
1.89e-05	0.727172	1	0.377	0.270591	cDC2-LAMP3	SFT2D1
1.97e-05	0.636549	1	0.316	0.28209	cDC2-LAMP3	PFKL
2.03e-05	0.295597	0.333	0.043	0.290006	cDC2-LAMP3	SLC9A7
2.04e-05	0.752707	0.556	0.119	0.292042	cDC2-LAMP3	AAED1
2.11e-05	0.338668	0.222	0.021	0.3024	cDC2-LAMP3	TRAF2
2.13e-05	0.820327	1	0.362	0.304974	cDC2-LAMP3	BZW1
2.27e-05	0.564166	0.222	0.021	0.324543	cDC2-LAMP3	TREML1
2.36e-05	0.450774	0.778	0.181	0.338239	cDC2-LAMP3	ADAM8
2.41e-05	0.915262	0.889	0.328	0.344733	cDC2-LAMP3	DNAJB6
2.41e-05	0.968376	1	0.671	0.345459	cDC2-LAMP3	SEC61B
2.42e-05	0.295623	0.444	0.071	0.346494	cDC2-LAMP3	C9orf85
3.29e-05	0.305105	0.556	0.105	0.470181	cDC2-LAMP3	ALG2
3.57e-05	1.59792	0.444	0.078	0.510528	cDC2-LAMP3	HSPA1B
3.58e-05	2.09399	1	0.612	0.512175	cDC2-LAMP3	SQSTM1
3.6e-05	0.556263	0.556	0.115	0.514563	cDC2-LAMP3	PTMS
3.63e-05	0.630617	0.667	0.155	0.518928	cDC2-LAMP3	NABP1
3.67e-05	0.42231	0.667	0.149	0.524985	cDC2-LAMP3	APMAP
3.82e-05	0.323848	0.333	0.046	0.546895	cDC2-LAMP3	NUDT9
3.9e-05	0.563136	0.667	0.156	0.557789	cDC2-LAMP3	DUSP2
3.94e-05	1.13256	1	0.47	0.563403	cDC2-LAMP3	CFLAR
3.94e-05	0.360805	0.333	0.046	0.5637	cDC2-LAMP3	FMNL2
3.96e-05	0.547865	0.889	0.252	0.566174	cDC2-LAMP3	UVRAG
3.99e-05	0.737721	0.444	0.079	0.571363	cDC2-LAMP3	AC016831.7
4.03e-05	0.741418	0.667	0.17	0.576705	cDC2-LAMP3	GRAMD1A
4.08e-05	0.552111	0.667	0.146	0.583581	cDC2-LAMP3	ARAP2
4.23e-05	1.44672	0.889	0.519	0.604816	cDC2-LAMP3	REL
4.9e-05	0.762338	0.556	0.118	0.701548	cDC2-LAMP3	PDE4B
5.26e-05	0.365767	0.556	0.111	0.752588	cDC2-LAMP3	IFIH1
5.45e-05	1.84495	0.889	0.779	0.779522	cDC2-LAMP3	PNRC1
5.5e-05	0.330261	0.667	0.148	0.787494	cDC2-LAMP3	OSBPL9
5.68e-05	0.652272	0.444	0.077	0.812128	cDC2-LAMP3	RAPGEF2
5.75e-05	0.471274	0.444	0.08	0.823073	cDC2-LAMP3	NAA25
5.76e-05	0.574792	0.556	0.119	0.82396	cDC2-LAMP3	TTYH2
5.78e-05	1.12253	0.778	0.261	0.826864	cDC2-LAMP3	TUBB4B
6.91e-05	0.864557	0.778	0.27	0.988784	cDC2-LAMP3	GPBP1
7.17e-05	0.514119	0.778	0.211	1	cDC2-LAMP3	CRYBG1
7.25e-05	0.381845	0.444	0.079	1	cDC2-LAMP3	NUP107
7.29e-05	0.69918	0.778	0.231	1	cDC2-LAMP3	IER3
7.73e-05	0.395308	0.889	0.231	1	cDC2-LAMP3	ABI1
7.79e-05	1.04705	0.778	0.224	1	cDC2-LAMP3	INSIG1
8.13e-05	0.597291	0.778	0.237	1	cDC2-LAMP3	RNF145
8.27e-05	0.281746	0.333	0.048	1	cDC2-LAMP3	NID1
8.39e-05	0.927675	0.889	0.347	1	cDC2-LAMP3	NFE2L2
8.47e-05	0.26629	0.333	0.048	1	cDC2-LAMP3	TMCC3
8.67e-05	0.364325	0.333	0.05	1	cDC2-LAMP3	SQLE
9.23e-05	0.438119	0.556	0.12	1	cDC2-LAMP3	BMP2K
9.83e-05	0.253615	0.333	0.048	1	cDC2-LAMP3	RNF103
0.000106	0.319148	0.556	0.116	1	cDC2-LAMP3	TRIM69
0.000111	0.265084	0.667	0.15	1	cDC2-LAMP3	ITFG1
0.000113	0.53183	0.667	0.172	1	cDC2-LAMP3	RELA
0.000115	0.765454	1	0.972	1	cDC2-LAMP3	HLA-A
0.000115	0.320011	0.556	0.118	1	cDC2-LAMP3	ZNF326
0.000121	0.506611	0.444	0.084	1	cDC2-LAMP3	LMNA
0.000122	0.257081	0.556	0.113	1	cDC2-LAMP3	RUFY3
0.000124	1.47479	1	0.947	1	cDC2-LAMP3	SRGN
0.000127	0.268258	0.556	0.115	1	cDC2-LAMP3	XPNPEP1
0.00013	0.671876	0.778	0.264	1	cDC2-LAMP3	APPL1
0.00013	0.331888	0.667	0.158	1	cDC2-LAMP3	RAB5B
0.000131	0.842736	1	0.709	1	cDC2-LAMP3	CTSZ
0.000131	0.470823	0.889	0.263	1	cDC2-LAMP3	SNN
0.000135	1.20886	0.667	0.221	1	cDC2-LAMP3	CHMP1B
0.000142	0.847657	0.889	0.296	1	cDC2-LAMP3	ARL8B
0.000143	0.349851	0.889	0.247	1	cDC2-LAMP3	RBM4
0.000143	0.369523	0.667	0.16	1	cDC2-LAMP3	ARL4A
0.000145	0.371015	0.444	0.086	1	cDC2-LAMP3	SRPK1
0.000153	0.34227	0.222	0.025	1	cDC2-LAMP3	LY9
0.000156	0.540333	0.333	0.053	1	cDC2-LAMP3	LINC00847
0.000174	0.623828	0.889	0.273	1	cDC2-LAMP3	PLXNC1
0.00018	0.307845	0.667	0.16	1	cDC2-LAMP3	FCHSD2
0.000227	0.411688	0.444	0.092	1	cDC2-LAMP3	DBNDD2
0.000227	0.259081	0.333	0.053	1	cDC2-LAMP3	ELMOD2
0.000263	0.448001	0.333	0.056	1	cDC2-LAMP3	CD59
0.000264	0.372604	0.444	0.092	1	cDC2-LAMP3	POLR2D
0.000267	0.383297	0.444	0.089	1	cDC2-LAMP3	MPZL1
0.000268	0.432418	0.778	0.227	1	cDC2-LAMP3	PELI1
0.000269	0.609474	0.667	0.174	1	cDC2-LAMP3	IL6ST
0.00027	0.84819	0.778	0.234	1	cDC2-LAMP3	SPPL2A
0.000274	0.264125	0.222	0.027	1	cDC2-LAMP3	ARMCX1
0.000279	1.16519	1	0.585	1	cDC2-LAMP3	CMTM6
0.000283	0.678297	1	0.993	1	cDC2-LAMP3	TMSB10
0.000283	0.55461	0.444	0.09	1	cDC2-LAMP3	RCN1
0.000298	0.58312	0.444	0.092	1	cDC2-LAMP3	DENND1B
0.000321	0.267854	0.556	0.125	1	cDC2-LAMP3	TNNI2
0.000325	0.526132	0.778	0.278	1	cDC2-LAMP3	UBE2A
0.000328	0.773424	1	0.63	1	cDC2-LAMP3	UBB
0.000333	0.581977	0.333	0.057	1	cDC2-LAMP3	ICAM4
0.00034	0.67934	0.667	0.221	1	cDC2-LAMP3	TNFAIP8
0.000344	0.308901	0.333	0.055	1	cDC2-LAMP3	HMCES
0.000366	0.848655	1	0.997	1	cDC2-LAMP3	TMSB4X
0.000368	0.596303	0.333	0.058	1	cDC2-LAMP3	PHLDA2
0.000374	0.335671	0.444	0.093	1	cDC2-LAMP3	NIT2
0.000387	0.368183	0.333	0.057	1	cDC2-LAMP3	GADD45A
0.000388	0.778688	1	0.624	1	cDC2-LAMP3	GRINA
0.000397	0.328051	0.444	0.091	1	cDC2-LAMP3	MAP3K14
0.000407	0.30391	0.889	0.264	1	cDC2-LAMP3	CTNNB1
0.00041	0.350701	0.333	0.058	1	cDC2-LAMP3	SREBF1
0.000453	0.475095	0.333	0.057	1	cDC2-LAMP3	RUBCNL
0.000489	1.07323	0.889	0.508	1	cDC2-LAMP3	HMGN3
0.00049	0.583169	0.667	0.203	1	cDC2-LAMP3	WDR33
0.000512	0.404858	0.778	0.23	1	cDC2-LAMP3	MAP4K4
0.000516	0.35888	0.222	0.029	1	cDC2-LAMP3	LZTFL1
0.000517	0.346175	0.667	0.182	1	cDC2-LAMP3	TRAF7
0.000521	0.488236	0.667	0.205	1	cDC2-LAMP3	ANXA4
0.000525	0.893443	0.778	0.339	1	cDC2-LAMP3	ARL6IP1
0.000528	0.611169	0.889	0.359	1	cDC2-LAMP3	TMEM14C
0.000536	0.259576	0.333	0.058	1	cDC2-LAMP3	GZF1
0.000553962	1.26098	1	0.738	1	cDC2-LAMP3	CRIP1
0.000571	0.294675	0.556	0.133	1	cDC2-LAMP3	NFKBID
0.000574	0.970751	1	0.592	1	cDC2-LAMP3	ARL6IP5
0.000577	0.275082	0.556	0.133	1	cDC2-LAMP3	MANF
0.000597	0.524334	0.667	0.189	1	cDC2-LAMP3	SNHG15
0.000609	0.638727	0.778	0.269	1	cDC2-LAMP3	TANK
0.000617	0.257448	0.444	0.094	1	cDC2-LAMP3	TMEM218
0.000637	0.571367	0.778	0.287	1	cDC2-LAMP3	CXCL16
0.000648	1.02705	0.556	0.166	1	cDC2-LAMP3	HSPH1
0.000652	0.504683	1	0.98	1	cDC2-LAMP3	EIF1
0.000678	0.364569	0.333	0.061	1	cDC2-LAMP3	ENHO
0.000729	0.59556	0.889	0.379	1	cDC2-LAMP3	ISCU
0.000766	0.418519	0.667	0.209	1	cDC2-LAMP3	G3BP1
0.000818	0.465967	0.556	0.151	1	cDC2-LAMP3	COA1
0.00084	0.706887	0.444	0.105	1	cDC2-LAMP3	CREM
0.000841	0.80756	0.889	0.625	1	cDC2-LAMP3	DBI
0.000845	0.303514	0.667	0.185	1	cDC2-LAMP3	TIMM17A
0.000858	0.663674	1	0.44	1	cDC2-LAMP3	UBE2B
0.000862	0.320752	0.444	0.101	1	cDC2-LAMP3	RRN3
0.000887	0.340813	0.444	0.104	1	cDC2-LAMP3	LYRM4
0.0009	0.268776	0.222	0.031	1	cDC2-LAMP3	P2RY14
0.000907	0.669925	1	0.985	1	cDC2-LAMP3	VIM
0.000913	0.254216	0.444	0.098	1	cDC2-LAMP3	TBC1D10A
0.000922	0.545371	0.889	0.284	1	cDC2-LAMP3	KYNU
0.000923	0.469582	0.444	0.106	1	cDC2-LAMP3	SUCO
0.000997	0.588503	0.889	0.432	1	cDC2-LAMP3	TAOK3
0.00100254	0.455741	0.778	0.245	1	cDC2-LAMP3	CIITA
0.00100997	0.251842	0.444	0.098	1	cDC2-LAMP3	PPIL4
0.00103963	0.662093	0.667	0.228	1	cDC2-LAMP3	PPIF
0.00108994	0.71082	1	0.361	1	cDC2-LAMP3	EZR
0.00110494	0.551694	0.444	0.114	1	cDC2-LAMP3	TOB2
0.00110948	0.489836	0.556	0.157	1	cDC2-LAMP3	RIPK2
0.00115733	0.303426	0.444	0.101	1	cDC2-LAMP3	SBNO2
0.00118434	0.313207	0.556	0.147	1	cDC2-LAMP3	APOBEC3G
0.00118725	0.277471	0.333	0.065	1	cDC2-LAMP3	INPP5F
0.00118771	1.34577	1	0.676	1	cDC2-LAMP3	HLA-DRB5
0.0012074	1.97749	0.889	0.318	1	cDC2-LAMP3	HSPA1A
0.00123771	0.400866	1	0.379	1	cDC2-LAMP3	ATF4
0.00128612	0.501475	0.556	0.152	1	cDC2-LAMP3	PTGER4
0.00130239	0.49716	1	0.467	1	cDC2-LAMP3	PPP1R18
0.00131447	0.624811	1	0.717	1	cDC2-LAMP3	YWHAZ
0.00132296	0.318866	0.222	0.033	1	cDC2-LAMP3	IDNK
0.00133957	0.311965	0.444	0.105	1	cDC2-LAMP3	DPP9
0.0013757	0.301171	0.444	0.106	1	cDC2-LAMP3	LMBR1L
0.00141016	0.380929	0.222	0.033	1	cDC2-LAMP3	NAB2
0.0014991	1.36419	0.667	0.293	1	cDC2-LAMP3	GADD45B
0.00152843	0.625032	0.667	0.235	1	cDC2-LAMP3	IL13RA1
0.00155497	0.359192	0.444	0.108	1	cDC2-LAMP3	PDE4DIP
0.00160355	0.635963	1	0.98	1	cDC2-LAMP3	HLA-C
0.00161078	0.250776	0.778	0.241	1	cDC2-LAMP3	ZFAND6
0.00162628	1.74148	0.333	0.074	1	cDC2-LAMP3	CKB
0.00163603	0.31031	0.444	0.109	1	cDC2-LAMP3	ESYT2
0.00168317	0.272252	0.667	0.199	1	cDC2-LAMP3	CREBRF
0.00189573	0.995604	1	0.999	1	cDC2-LAMP3	EEF1A1
0.00191592	0.667127	1	0.667	1	cDC2-LAMP3	NPM1
0.0019854	0.794331	1	0.692	1	cDC2-LAMP3	SUB1
0.00206341	0.511193	0.778	0.318	1	cDC2-LAMP3	HSPD1
0.00208178	0.663717	1	0.921	1	cDC2-LAMP3	GSTP1
0.00208998	0.285605	0.556	0.157	1	cDC2-LAMP3	MAP2K4
0.00210435	0.61054	1	0.723	1	cDC2-LAMP3	HINT1
0.0021093	0.827925	0.889	0.456	1	cDC2-LAMP3	MYADM
0.00210938	0.261308	0.111	0.01	1	cDC2-LAMP3	ESAM
0.00212638	1.08462	0.778	0.6	1	cDC2-LAMP3	CTSH
0.00213585	0.590842	0.667	0.249	1	cDC2-LAMP3	RHEB
0.00215087	0.570196	0.556	0.174	1	cDC2-LAMP3	AD000671.2
0.00215848	0.309662	0.556	0.156	1	cDC2-LAMP3	RUNX3
0.00220061	0.953701	1	0.997	1	cDC2-LAMP3	MALAT1
0.00223365	0.716943	1	0.991	1	cDC2-LAMP3	HLA-B
0.00225304	0.672559	0.667	0.252	1	cDC2-LAMP3	RNF144B
0.00229475	0.601542	0.444	0.123	1	cDC2-LAMP3	PMAIP1
0.00234565	0.535062	0.333	0.073	1	cDC2-LAMP3	HIVEP1
0.00235425	0.356498	0.778	0.27	1	cDC2-LAMP3	MAPK1IP1L
0.00238763	0.385777	0.778	0.279	1	cDC2-LAMP3	ANXA7
0.00246901	0.516154	0.556	0.184	1	cDC2-LAMP3	OSER1
0.0024906	0.540727	0.889	0.453	1	cDC2-LAMP3	SRSF2
0.00256392	0.324503	0.667	0.214	1	cDC2-LAMP3	SRPK2
0.00264149	0.363651	0.556	0.167	1	cDC2-LAMP3	DDX3Y
0.00265748	0.430708	0.556	0.17	1	cDC2-LAMP3	CCDC50
0.00266944	0.346947	0.444	0.119	1	cDC2-LAMP3	EDEM1
0.00271314	0.864369	0.667	0.229	1	cDC2-LAMP3	GBP1
0.0027313	0.599431	1	0.962	1	cDC2-LAMP3	MYL6
0.0028296	0.354	0.333	0.071	1	cDC2-LAMP3	PRMT9
0.00292795	0.29902	0.667	0.213	1	cDC2-LAMP3	ASH1L
0.00305407	0.420792	0.556	0.177	1	cDC2-LAMP3	PHKB
0.00328463	0.755015	0.778	0.269	1	cDC2-LAMP3	EPSTI1
0.00335564	0.284423	0.778	0.261	1	cDC2-LAMP3	ARHGEF2
0.00338994	0.335441	0.778	0.269	1	cDC2-LAMP3	CLINT1
0.0034701	0.357484	0.222	0.037	1	cDC2-LAMP3	DNASE1L3
0.00357545	0.547393	0.889	0.431	1	cDC2-LAMP3	TPM4
0.00360095	0.571939	0.778	0.346	1	cDC2-LAMP3	CYTH1
0.00362957	0.471973	1	0.499	1	cDC2-LAMP3	ALDH2
0.00365212	0.300676	0.333	0.074	1	cDC2-LAMP3	N4BP2
0.00369478	0.287462	0.444	0.118	1	cDC2-LAMP3	TPRA1
0.00380675	0.294164	0.444	0.118	1	cDC2-LAMP3	ZFAND2A
0.00384361	0.529606	0.556	0.176	1	cDC2-LAMP3	ZNF267
0.00384541	0.335513	0.333	0.08	1	cDC2-LAMP3	IL18BP
0.00392112	0.844921	0.444	0.138	1	cDC2-LAMP3	PIKFYVE
0.00399686	0.255856	0.444	0.116	1	cDC2-LAMP3	OTULIN
0.00406097	0.487422	0.667	0.254	1	cDC2-LAMP3	CDC42SE2
0.00419368	0.327572	0.444	0.117	1	cDC2-LAMP3	ARHGAP31
0.00427493	0.530192	0.556	0.188	1	cDC2-LAMP3	ATF5
0.00429519	0.513181	0.667	0.261	1	cDC2-LAMP3	MTHFD2
0.00438118	0.262609	0.222	0.039	1	cDC2-LAMP3	ZNF738
0.00466651	0.32074	0.889	0.339	1	cDC2-LAMP3	HNRNPL
0.00472895	0.40976	0.444	0.128	1	cDC2-LAMP3	ABHD12
0.0047389	0.744539	0.778	0.353	1	cDC2-LAMP3	CYTIP
0.00488453	0.652389	0.222	0.042	1	cDC2-LAMP3	CLEC2D
0.00512355	0.516127	0.889	0.426	1	cDC2-LAMP3	MAP1LC3B
0.00512599	0.405422	0.889	0.406	1	cDC2-LAMP3	BAZ1A
0.00514878	0.806106	0.778	0.328	1	cDC2-LAMP3	HSPE1
0.00521485	0.597066	0.778	0.342	1	cDC2-LAMP3	ERICH1
0.00528559	0.336036	0.444	0.131	1	cDC2-LAMP3	TRPV2
0.00534808	0.578063	0.222	0.04	1	cDC2-LAMP3	CXCL2
0.00544462	0.285007	0.444	0.125	1	cDC2-LAMP3	MCM5
0.00546385	0.47305	0.556	0.201	1	cDC2-LAMP3	ANKRD10
0.00548774	0.273652	0.444	0.122	1	cDC2-LAMP3	DLGAP4
0.00551521	0.36034	0.556	0.179	1	cDC2-LAMP3	BIRC2
0.00555159	0.352153	0.333	0.082	1	cDC2-LAMP3	APOL2
0.00555626	0.766524	0.889	0.655	1	cDC2-LAMP3	NAP1L1
0.0055589	0.279249	0.222	0.041	1	cDC2-LAMP3	SFT2D3
0.00556254	0.452359	0.556	0.19	1	cDC2-LAMP3	COMMD1
0.00569389	0.763398	0.889	0.634	1	cDC2-LAMP3	NFKBIA
0.00574296	0.250695	0.444	0.125	1	cDC2-LAMP3	JMJD6
0.00575246	0.58732	1	0.598	1	cDC2-LAMP3	PLEK
0.00581669	0.27703	0.444	0.125	1	cDC2-LAMP3	REV3L
0.00590795	0.518784	0.889	0.41	1	cDC2-LAMP3	LAP3
0.00592605	0.406682	0.667	0.258	1	cDC2-LAMP3	TRA2A
0.00608853	0.636992	1	0.613	1	cDC2-LAMP3	HSP90AB1
0.00624674	0.48629	0.667	0.261	1	cDC2-LAMP3	HSPA9
0.00632557	0.398921	0.556	0.189	1	cDC2-LAMP3	LAMTOR3
0.00649404	0.718248	0.222	0.044	1	cDC2-LAMP3	ANKRD37
0.00656297	0.659249	0.778	0.475	1	cDC2-LAMP3	OSTF1
0.00666145	0.297975	0.778	0.295	1	cDC2-LAMP3	PPP2CA
0.00667969	0.278053	0.333	0.08	1	cDC2-LAMP3	CCSER2
0.00682003	1.06915	0.444	0.143	1	cDC2-LAMP3	FABP5
0.00710039	0.447383	0.556	0.18	1	cDC2-LAMP3	STX4
0.007368	0.26094	0.222	0.043	1	cDC2-LAMP3	PFKP
0.00736952	0.475373	0.556	0.184	1	cDC2-LAMP3	FDPS
0.00741488	0.565533	0.889	0.417	1	cDC2-LAMP3	BRD2
0.00786414	1.51562	0.778	0.445	1	cDC2-LAMP3	TUBB
0.00790002	0.303209	0.333	0.085	1	cDC2-LAMP3	WDR48
0.00792337	0.257561	0.556	0.182	1	cDC2-LAMP3	TMEM131
0.00796886	0.701428	1	0.575	1	cDC2-LAMP3	TUBA1A
0.00807591	0.538831	0.333	0.088	1	cDC2-LAMP3	KLF7
0.00833664	0.342825	0.444	0.141	1	cDC2-LAMP3	CCDC90B
0.008591	0.462497	0.556	0.215	1	cDC2-LAMP3	SLC6A6
0.00873772	0.379307	0.667	0.244	1	cDC2-LAMP3	SMARCA5
0.00883147	1.24619	0.778	0.45	1	cDC2-LAMP3	ATOX1
0.00891263	0.293433	0.222	0.044	1	cDC2-LAMP3	HIST3H2A
0.00919632	0.256897	0.222	0.045	1	cDC2-LAMP3	TIFA
0.00935927	0.953028	0.778	0.385	1	cDC2-LAMP3	ATP2B1
0.00938186	0.322763	0.667	0.267	1	cDC2-LAMP3	UBE2N
0.00970527	0.361681	0.444	0.145	1	cDC2-LAMP3	GLA
0.00970822	0.841166	0.444	0.151	1	cDC2-LAMP3	FOSB
0	2.23331	1	0.002	0	cDC2-MKI67	TYMS
0	1.52973	0.842	0.005	0	cDC2-MKI67	PCLAF
0	1.41894	0.895	0.006	0	cDC2-MKI67	TK1
0	1.39198	0.895	0.004	0	cDC2-MKI67	MKI67
0	1.388	0.737	0.002	0	cDC2-MKI67	UBE2C
0	1.22683	0.842	0.001	0	cDC2-MKI67	CDK1
0	0.93782	0.632	0.002	0	cDC2-MKI67	BIRC5
0	0.925312	0.789	0.005	0	cDC2-MKI67	ZWINT
0	0.861383	0.684	0.005	0	cDC2-MKI67	CENPF
0	0.854315	0.684	0.002	0	cDC2-MKI67	CENPM
0	0.835819	0.632	0.002	0	cDC2-MKI67	PKMYT1
0	0.832847	0.632	0.003	0	cDC2-MKI67	TOP2A
0	0.744756	0.526	0.001	0	cDC2-MKI67	CDC20
0	0.709137	0.632	0.002	0	cDC2-MKI67	NCAPH
0	0.627488	0.579	0.001	0	cDC2-MKI67	ESCO2
0	0.613542	0.526	0.001	0	cDC2-MKI67	RRM2
0	0.603297	0.579	0.003	0	cDC2-MKI67	TPX2
0	0.597816	0.474	0.001	0	cDC2-MKI67	CDCA3
0	0.592482	0.474	0.002	0	cDC2-MKI67	MND1
0	0.579602	0.632	0.001	0	cDC2-MKI67	FOXM1
0	0.559134	0.579	0.002	0	cDC2-MKI67	CCNA2
0	0.556974	0.579	0.004	0	cDC2-MKI67	AURKB
0	0.538663	0.579	0.003	0	cDC2-MKI67	ASPM
0	0.519806	0.526	0.003	0	cDC2-MKI67	CDT1
0	0.510912	0.579	0.001	0	cDC2-MKI67	CEP55
0	0.444483	0.368	0.002	0	cDC2-MKI67	DEPDC1B
0	0.433913	0.421	0.001	0	cDC2-MKI67	HMMR
0	0.416245	0.526	0.001	0	cDC2-MKI67	CDCA5
0	0.395439	0.368	0.001	0	cDC2-MKI67	TROAP
0	0.365682	0.421	0.001	0	cDC2-MKI67	ANLN
0	0.328184	0.474	0.002	0	cDC2-MKI67	KIF11
0	0.311075	0.421	0.001	0	cDC2-MKI67	KIF15
0	0.299906	0.368	0.001	0	cDC2-MKI67	NDC80
0	0.287249	0.421	0.001	0	cDC2-MKI67	FAM111B
1.7e-284	0.572223	0.526	0.004	2.44e-280	cDC2-MKI67	CCNB2
4.86e-282	0.420119	0.421	0.002	6.96e-278	cDC2-MKI67	CENPS-CORT
2.24e-274	0.715688	0.579	0.005	3.2e-270	cDC2-MKI67	UHRF1
2.87e-257	0.472049	0.579	0.005	4.11e-253	cDC2-MKI67	CLSPN
3.74e-250	0.613441	0.579	0.005	5.35e-246	cDC2-MKI67	MAD2L1
2.77e-248	0.660903	0.737	0.008	3.96e-244	cDC2-MKI67	CENPK
1.42e-227	0.44672	0.526	0.005	2.03e-223	cDC2-MKI67	WDR76
2.64e-217	0.468534	0.474	0.004	3.78e-213	cDC2-MKI67	SGO1
1.77e-213	0.440623	0.474	0.004	2.53e-209	cDC2-MKI67	HIST1H2AJ
8.63e-208	0.67507	0.632	0.007	1.24e-203	cDC2-MKI67	CDKN3
2.9e-201	1.12742	0.737	0.011	4.15e-197	cDC2-MKI67	NUSAP1
1e-193	0.54534	0.526	0.005	1.43e-189	cDC2-MKI67	KIFC1
1.57e-183	0.32579	0.421	0.004	2.24e-179	cDC2-MKI67	NCAPG
2.71e-183	0.413555	0.579	0.007	3.87e-179	cDC2-MKI67	HELLS
4.26e-166	0.489132	0.474	0.005	6.1e-162	cDC2-MKI67	ALDH7A1
9.96e-165	0.808317	0.789	0.015	1.42e-160	cDC2-MKI67	GGH
2.88e-161	0.76864	0.684	0.011	4.12e-157	cDC2-MKI67	MYBL2
1.41e-158	0.623282	0.579	0.008	2.02e-154	cDC2-MKI67	UBE2T
2.29e-128	0.508952	0.474	0.007	3.28e-124	cDC2-MKI67	SHCBP1
9.06e-126	0.326953	0.474	0.007	1.3e-121	cDC2-MKI67	POC1A
1.38e-121	0.299614	0.316	0.003	1.97e-117	cDC2-MKI67	GINS2
1.44e-120	0.66333	0.526	0.009	2.06e-116	cDC2-MKI67	WDR34
4.43e-117	0.292	0.211	0.001	6.34e-113	cDC2-MKI67	KIF24
3.61e-109	0.499134	0.526	0.01	5.16e-105	cDC2-MKI67	ORC6
3.3e-108	0.370864	0.526	0.01	4.72e-104	cDC2-MKI67	RAD51AP1
3.87e-104	1.12436	0.789	0.024	5.53e-100	cDC2-MKI67	TMEM106C
1.2e-102	0.804721	0.421	0.007	1.72e-98	cDC2-MKI67	CCNB1
6.98e-102	0.626604	0.579	0.013	9.98e-98	cDC2-MKI67	KIF23
9.86e-100	0.590576	0.684	0.018	1.41e-95	cDC2-MKI67	ACOT7
9.05e-98	0.52523	0.421	0.007	1.3e-93	cDC2-MKI67	KNL1
1.21e-96	0.40335	0.368	0.005	1.73e-92	cDC2-MKI67	TCF19
2.22e-95	0.767606	0.316	0.004	3.18e-91	cDC2-MKI67	PLK1
1.18e-94	0.583876	0.421	0.007	1.68e-90	cDC2-MKI67	CCDC34
3.95e-89	1.3616	0.842	0.032	5.65e-85	cDC2-MKI67	PTTG1
7.05e-80	0.35019	0.526	0.014	1.01e-75	cDC2-MKI67	CENPH
6.52e-75	2.78939	1	0.059	9.33e-71	cDC2-MKI67	STMN1
1.36e-73	0.692849	0.684	0.025	1.95e-69	cDC2-MKI67	CENPN
8.01e-71	0.541957	0.684	0.026	1.15e-66	cDC2-MKI67	FEN1
9.11e-71	0.672102	0.632	0.022	1.3e-66	cDC2-MKI67	ASF1B
2.52e-70	0.359173	0.632	0.022	3.61e-66	cDC2-MKI67	GMNN
7.51e-62	0.304389	0.368	0.009	1.07e-57	cDC2-MKI67	ARG2
7.75e-62	0.398895	0.421	0.011	1.11e-57	cDC2-MKI67	NCAPG2
3.06e-61	0.438476	0.526	0.018	4.38e-57	cDC2-MKI67	TIMELESS
1.25e-60	0.367535	0.421	0.012	1.78e-56	cDC2-MKI67	PRC1
1.27e-59	0.388325	0.316	0.007	1.82e-55	cDC2-MKI67	HIST1H1B
1.82e-57	0.369475	0.421	0.012	2.61e-53	cDC2-MKI67	ZWILCH
3.67e-57	0.308885	0.368	0.009	5.25e-53	cDC2-MKI67	APOBEC3B
6.45e-52	1.18078	0.895	0.065	9.23e-48	cDC2-MKI67	CKS1B
6.79e-52	0.366005	0.421	0.013	9.71e-48	cDC2-MKI67	HIST1H2AM
8.94e-52	0.669114	0.684	0.035	1.28e-47	cDC2-MKI67	ATAD2
2.65e-49	0.734695	0.684	0.037	3.79e-45	cDC2-MKI67	HMGB3
1.94e-48	0.262968	0.316	0.008	2.78e-44	cDC2-MKI67	HIST1H2BH
4.18e-48	0.416677	0.368	0.011	5.98e-44	cDC2-MKI67	CENPP
5.62e-48	0.680602	0.737	0.043	8.04e-44	cDC2-MKI67	DNAJC9
6.19e-48	0.37013	0.368	0.011	8.85e-44	cDC2-MKI67	HIST2H2AB
5.05e-47	1.97454	0.895	0.07	7.22e-43	cDC2-MKI67	RGCC
1.54e-46	0.457523	0.474	0.019	2.21e-42	cDC2-MKI67	RFC4
2.9e-45	0.903837	0.789	0.054	4.15e-41	cDC2-MKI67	PAICS
1.39e-43	0.337692	0.211	0.004	1.99e-39	cDC2-MKI67	PSMC3IP
1.81e-43	0.456205	0.421	0.016	2.59e-39	cDC2-MKI67	GEM
1.04e-42	0.409736	0.316	0.009	1.49e-38	cDC2-MKI67	HIST1H2AI
4.93e-41	1.09768	0.789	0.06	7.05e-37	cDC2-MKI67	ENHO
1.48e-40	0.462306	0.579	0.032	2.12e-36	cDC2-MKI67	TEX30
3.51e-40	0.34748	0.316	0.01	5.02e-36	cDC2-MKI67	FANCI
6.52e-40	0.376701	0.368	0.014	9.33e-36	cDC2-MKI67	CENPU
7.51e-39	1.59785	0.895	0.086	1.07e-34	cDC2-MKI67	CD1C
2.25e-38	0.52995	0.632	0.039	3.22e-34	cDC2-MKI67	HYI
2.1e-36	0.458349	0.526	0.029	3e-32	cDC2-MKI67	EZH2
3.73e-34	0.690293	0.737	0.061	5.33e-30	cDC2-MKI67	ATP1B1
2.01e-33	1.13601	0.789	0.077	2.87e-29	cDC2-MKI67	H2AFX
4.31e-33	0.371116	0.526	0.032	6.16e-29	cDC2-MKI67	PXMP2
1.17e-32	0.550807	0.579	0.039	1.68e-28	cDC2-MKI67	GSTM1
4.77e-32	0.538299	0.737	0.063	6.83e-28	cDC2-MKI67	C12orf75
6.19e-32	0.712426	0.579	0.04	8.85e-28	cDC2-MKI67	OSM
7.76e-32	0.601834	0.737	0.064	1.11e-27	cDC2-MKI67	SLC25A19
2.25e-31	1.74105	0.895	0.105	3.22e-27	cDC2-MKI67	GPR183
3.17e-31	0.322931	0.368	0.017	4.54e-27	cDC2-MKI67	DUSP4
1.02e-30	0.276271	0.263	0.009	1.46e-26	cDC2-MKI67	C17orf107
1.58e-30	0.716553	0.684	0.059	2.26e-26	cDC2-MKI67	PCNA
3.28e-29	0.675874	0.579	0.045	4.69e-25	cDC2-MKI67	DHFR
3.61e-29	0.357255	0.263	0.01	5.17e-25	cDC2-MKI67	VSIG10
7.12e-29	0.820262	0.684	0.062	1.02e-24	cDC2-MKI67	MCM7
1.4e-28	0.342185	0.474	0.03	2e-24	cDC2-MKI67	HIRIP3
1.47e-28	0.480107	0.579	0.044	2.1e-24	cDC2-MKI67	AVPI1
1.68e-28	0.420478	0.526	0.037	2.41e-24	cDC2-MKI67	CDC25B
8.67e-28	0.439745	0.263	0.01	1.24e-23	cDC2-MKI67	TCEAL9
1.57e-27	0.683088	0.737	0.072	2.25e-23	cDC2-MKI67	HADH
1.99e-27	0.988409	0.421	0.026	2.85e-23	cDC2-MKI67	ID3
2.26e-27	0.536714	0.526	0.039	3.24e-23	cDC2-MKI67	BTG3
2.71e-27	0.282131	0.316	0.015	3.88e-23	cDC2-MKI67	MCM4
6.07e-27	0.290891	0.474	0.031	8.69e-23	cDC2-MKI67	PRR11
8.78e-27	0.609975	0.632	0.057	1.26e-22	cDC2-MKI67	CENPW
2.17e-26	0.845137	0.737	0.081	3.11e-22	cDC2-MKI67	SMC4
3.43e-26	0.422575	0.526	0.04	4.91e-22	cDC2-MKI67	RRM1
9.5e-26	0.28356	0.474	0.033	1.36e-21	cDC2-MKI67	AHI1
9.71e-26	1.12734	0.842	0.104	1.39e-21	cDC2-MKI67	CREM
1.33e-25	1.10485	0.789	0.098	1.9e-21	cDC2-MKI67	KPNA2
8.06e-25	0.598994	0.684	0.071	1.15e-20	cDC2-MKI67	DTYMK
1.09e-24	0.26197	0.158	0.004	1.56e-20	cDC2-MKI67	TLR3
1.97e-24	0.640102	0.421	0.028	2.82e-20	cDC2-MKI67	OLR1
2.04e-24	0.519429	0.474	0.036	2.91e-20	cDC2-MKI67	SMC2
2.28e-24	0.432094	0.474	0.035	3.27e-20	cDC2-MKI67	PKIB
2.45e-24	1.17563	0.632	0.063	3.51e-20	cDC2-MKI67	NR4A3
2.97e-24	0.25112	0.263	0.011	4.25e-20	cDC2-MKI67	SRR
3.19e-24	0.411449	0.316	0.016	4.56e-20	cDC2-MKI67	ATAD5
4.46e-24	0.296092	0.368	0.022	6.37e-20	cDC2-MKI67	IFI27L1
5.11e-24	0.258379	0.368	0.022	7.31e-20	cDC2-MKI67	LIG1
5.72e-24	0.565419	0.368	0.022	8.19e-20	cDC2-MKI67	AC011603.2
7.52e-24	0.561054	0.737	0.08	1.08e-19	cDC2-MKI67	EXOSC8
7.81e-24	0.375482	0.579	0.051	1.12e-19	cDC2-MKI67	CCDC167
7.93e-24	0.877557	0.526	0.044	1.13e-19	cDC2-MKI67	C15orf48
1.6e-23	0.452028	0.632	0.061	2.28e-19	cDC2-MKI67	LMNB2
1.76e-23	0.6516	0.368	0.023	2.52e-19	cDC2-MKI67	SDS
2.56e-23	0.568006	0.474	0.037	3.66e-19	cDC2-MKI67	POLA2
5.13e-23	0.439519	0.368	0.023	7.34e-19	cDC2-MKI67	TNFRSF12A
2.12e-22	0.26325	0.474	0.037	3.03e-18	cDC2-MKI67	ITGB3BP
2.34e-22	0.608057	0.526	0.047	3.35e-18	cDC2-MKI67	SVIP
2.87e-22	0.396146	0.684	0.073	4.11e-18	cDC2-MKI67	CBX5
2.9e-22	0.310373	0.368	0.024	4.16e-18	cDC2-MKI67	SLC39A8
3.31e-22	0.367665	0.474	0.038	4.74e-18	cDC2-MKI67	BARD1
5.17e-22	1.15686	0.684	0.088	7.4e-18	cDC2-MKI67	CKS2
5.82e-22	0.467847	0.526	0.048	8.32e-18	cDC2-MKI67	VRK1
1.6e-21	0.524588	0.474	0.041	2.29e-17	cDC2-MKI67	TMEM273
1.09e-20	0.290623	0.316	0.019	1.56e-16	cDC2-MKI67	PRIM1
1.28e-20	1.00107	0.895	0.164	1.84e-16	cDC2-MKI67	HPRT1
1.68e-20	0.452288	0.526	0.05	2.41e-16	cDC2-MKI67	AFF3
1.73e-20	0.277542	0.105	0.002	2.47e-16	cDC2-MKI67	PLEK2
2.01e-20	0.367763	0.632	0.069	2.87e-16	cDC2-MKI67	ACAT2
2.26e-20	0.373419	0.316	0.019	3.24e-16	cDC2-MKI67	CCR7
2.56e-20	0.302563	0.368	0.026	3.67e-16	cDC2-MKI67	EMP1
3.79e-20	0.303231	0.368	0.026	5.42e-16	cDC2-MKI67	CDCA7L
7.84e-20	0.405873	0.526	0.052	1.12e-15	cDC2-MKI67	NDRG2
8.07e-20	0.386875	0.263	0.014	1.15e-15	cDC2-MKI67	MAP7
8.78e-20	0.310904	0.526	0.051	1.26e-15	cDC2-MKI67	BCL2L12
1.16e-19	0.877417	0.842	0.142	1.66e-15	cDC2-MKI67	RPA3
1.83e-19	1.01596	0.526	0.054	2.62e-15	cDC2-MKI67	CXCL8
9.42e-19	1.04583	0.632	0.078	1.35e-14	cDC2-MKI67	FCER1A
1.67e-18	0.302982	0.316	0.021	2.4e-14	cDC2-MKI67	OXCT1
1.78e-18	0.354947	0.526	0.055	2.55e-14	cDC2-MKI67	GRASP
3.71e-18	0.375218	0.421	0.037	5.31e-14	cDC2-MKI67	TUBG1
3.85e-18	1.44608	0.789	0.133	5.51e-14	cDC2-MKI67	NR4A2
4.29e-18	0.732134	0.789	0.123	6.13e-14	cDC2-MKI67	PHACTR1
5.99e-18	1.26159	0.737	0.122	8.57e-14	cDC2-MKI67	ATF3
9.47e-18	0.712951	0.684	0.097	1.36e-13	cDC2-MKI67	SKA2
1.02e-17	0.949771	0.632	0.083	1.46e-13	cDC2-MKI67	LMNA
1.15e-17	0.393804	0.632	0.079	1.64e-13	cDC2-MKI67	CKAP2
1.35e-17	0.470845	0.684	0.092	1.93e-13	cDC2-MKI67	SLC25A33
1.56e-17	0.312607	0.316	0.022	2.23e-13	cDC2-MKI67	INCENP
2.25e-17	1.31198	0.789	0.143	3.21e-13	cDC2-MKI67	FABP5
2.26e-17	0.404454	0.579	0.068	3.24e-13	cDC2-MKI67	BOLA3
2.34e-17	1.41972	0.895	0.198	3.34e-13	cDC2-MKI67	CD83
2.6e-17	2.43683	0.947	0.292	3.71e-13	cDC2-MKI67	HIST1H4C
3.16e-17	0.396498	0.474	0.048	4.53e-13	cDC2-MKI67	MCM3
3.47e-17	1.13527	0.895	0.188	4.97e-13	cDC2-MKI67	TUBA1C
6.25e-17	0.266961	0.263	0.016	8.94e-13	cDC2-MKI67	SNAI1
7.85e-17	1.23708	0.789	0.151	1.12e-12	cDC2-MKI67	FOSB
9.1e-17	1.38604	0.947	0.26	1.3e-12	cDC2-MKI67	TUBB4B
1.23e-16	2.58206	1	0.445	1.76e-12	cDC2-MKI67	TUBB
1.3e-16	0.315872	0.526	0.06	1.86e-12	cDC2-MKI67	ADAM28
2.51e-16	0.401012	0.526	0.061	3.6e-12	cDC2-MKI67	NCAPD2
3.54e-16	0.408185	0.368	0.032	5.06e-12	cDC2-MKI67	SPATA33
3.79e-16	1.43756	1	0.342	5.43e-12	cDC2-MKI67	HMGB2
4.93e-16	0.284489	0.368	0.032	7.05e-12	cDC2-MKI67	CMSS1
5.55e-16	0.581306	0.526	0.066	7.94e-12	cDC2-MKI67	RAD51C
6.66e-16	0.788595	0.842	0.168	9.53e-12	cDC2-MKI67	NASP
7.49e-16	0.497576	0.526	0.064	1.07e-11	cDC2-MKI67	C1orf54
1.05e-15	0.270846	0.474	0.051	1.5e-11	cDC2-MKI67	GABPB1
1.73e-15	1.10191	0.895	0.197	2.47e-11	cDC2-MKI67	NR4A1
3.3e-15	1.09203	0.789	0.156	4.73e-11	cDC2-MKI67	DUSP2
3.44e-15	2.47803	1	0.562	4.92e-11	cDC2-MKI67	TUBA1B
4.04e-15	0.631381	0.895	0.178	5.79e-11	cDC2-MKI67	UQCC2
4.6e-15	0.304606	0.474	0.054	6.58e-11	cDC2-MKI67	PDLIM1
6.48e-15	0.333106	0.421	0.045	9.26e-11	cDC2-MKI67	RNASEH2A
8.1e-15	0.688532	0.579	0.082	1.16e-10	cDC2-MKI67	HBEGF
1.07e-14	1.97407	1	0.608	1.54e-10	cDC2-MKI67	H2AFZ
1.62e-14	0.692226	0.579	0.086	2.31e-10	cDC2-MKI67	SPATS2L
1.99e-14	0.779261	0.789	0.158	2.85e-10	cDC2-MKI67	LMNB1
2.78e-14	2.04863	1	0.728	3.98e-10	cDC2-MKI67	HMGN2
3.8e-14	0.400689	0.684	0.107	5.44e-10	cDC2-MKI67	PSMD14
5.08e-14	0.404012	0.737	0.123	7.26e-10	cDC2-MKI67	HAT1
5.88e-14	0.87482	0.474	0.059	8.41e-10	cDC2-MKI67	AREG
6.15e-14	0.830927	0.789	0.149	8.8e-10	cDC2-MKI67	DCK
6.93e-14	1.54224	1	0.785	9.91e-10	cDC2-MKI67	HMGB1
7.66e-14	0.526461	0.737	0.128	1.1e-09	cDC2-MKI67	CDK4
9.42e-14	0.55644	0.789	0.151	1.35e-09	cDC2-MKI67	TFDP1
9.76e-14	0.309609	0.211	0.013	1.4e-09	cDC2-MKI67	AL592295.4
1.18e-13	0.609995	0.632	0.104	1.69e-09	cDC2-MKI67	PAPSS2
1.2e-13	0.251587	0.474	0.058	1.72e-09	cDC2-MKI67	GZF1
1.25e-13	0.413344	0.421	0.047	1.78e-09	cDC2-MKI67	NETO2
1.58e-13	0.271328	0.263	0.021	2.25e-09	cDC2-MKI67	MCM6
1.61e-13	0.911349	0.737	0.149	2.31e-09	cDC2-MKI67	ARL4C
2.05e-13	1.14464	0.895	0.267	2.93e-09	cDC2-MKI67	RANBP1
2.41e-13	0.452008	0.684	0.113	3.44e-09	cDC2-MKI67	NUCB2
2.65e-13	0.31066	0.421	0.048	3.8e-09	cDC2-MKI67	MPHOSPH9
3.51e-13	1.00501	1	0.985	5.02e-09	cDC2-MKI67	PTMA
4.04e-13	1.11305	0.895	0.303	5.78e-09	cDC2-MKI67	NUCKS1
4.34e-13	0.275603	0.632	0.098	6.2e-09	cDC2-MKI67	BEX4
6.18e-13	0.463393	0.474	0.063	8.84e-09	cDC2-MKI67	ZC3H12A
7.81e-13	0.439571	0.579	0.091	1.12e-08	cDC2-MKI67	POLD2
9.04e-13	0.614163	0.684	0.128	1.29e-08	cDC2-MKI67	ANP32E
9.33e-13	0.612504	0.842	0.179	1.33e-08	cDC2-MKI67	AHCY
9.8e-13	0.254999	0.421	0.051	1.4e-08	cDC2-MKI67	P2RY6
1.44e-12	0.716344	0.842	0.205	2.06e-08	cDC2-MKI67	NUDT1
1.63e-12	0.746085	0.632	0.115	2.33e-08	cDC2-MKI67	FCGR2B
1.82e-12	0.437276	0.684	0.124	2.6e-08	cDC2-MKI67	REV3L
2.01e-12	0.338666	0.368	0.041	2.87e-08	cDC2-MKI67	THOP1
2.1e-12	1.30086	0.895	0.282	3.01e-08	cDC2-MKI67	CDKN1A
2.36e-12	0.637686	0.842	0.19	3.38e-08	cDC2-MKI67	EIF4A3
2.39e-12	0.992926	1	0.914	3.42e-08	cDC2-MKI67	PPIA
2.72e-12	0.311042	0.421	0.052	3.89e-08	cDC2-MKI67	SLC25A51
2.94e-12	0.500913	0.579	0.096	4.21e-08	cDC2-MKI67	SAE1
2.97e-12	0.435668	0.526	0.08	4.24e-08	cDC2-MKI67	CKAP5
3.99e-12	0.253641	0.263	0.023	5.7e-08	cDC2-MKI67	SUPT3H
4.06e-12	0.833471	0.895	0.268	5.81e-08	cDC2-MKI67	HNRNPAB
4.12e-12	1.14805	0.947	0.473	5.9e-08	cDC2-MKI67	H2AFV
4.38e-12	0.305303	0.421	0.053	6.26e-08	cDC2-MKI67	CST7
4.64e-12	1.09713	1	0.539	6.64e-08	cDC2-MKI67	RAN
4.84e-12	0.735743	0.737	0.155	6.92e-08	cDC2-MKI67	GPAT3
5.18e-12	0.690058	0.789	0.177	7.41e-08	cDC2-MKI67	TMEM109
5.33e-12	0.326261	0.368	0.042	7.63e-08	cDC2-MKI67	KIF20B
5.86e-12	0.328259	0.579	0.091	8.39e-08	cDC2-MKI67	AIG1
6e-12	0.491095	0.579	0.098	8.59e-08	cDC2-MKI67	HAUS1
6.3e-12	0.872094	0.947	0.28	9.02e-08	cDC2-MKI67	PEBP1
6.9e-12	1.19651	0.895	0.312	9.87e-08	cDC2-MKI67	DUT
7.88e-12	0.619726	0.737	0.152	1.13e-07	cDC2-MKI67	SERTAD1
8e-12	0.382644	0.316	0.033	1.14e-07	cDC2-MKI67	CD1E
8.03e-12	0.684076	0.737	0.15	1.15e-07	cDC2-MKI67	GLO1
8.49e-12	0.339183	0.368	0.043	1.22e-07	cDC2-MKI67	IL1R2
8.8e-12	0.545827	0.421	0.057	1.26e-07	cDC2-MKI67	PHLDA2
1.31e-11	0.772308	0.947	0.268	1.88e-07	cDC2-MKI67	LSM5
1.39e-11	0.304103	0.474	0.067	1.99e-07	cDC2-MKI67	CA2
1.39e-11	0.262721	0.158	0.009	2e-07	cDC2-MKI67	HAPLN3
1.51e-11	0.311776	0.474	0.067	2.16e-07	cDC2-MKI67	ACTL6A
1.54e-11	0.75493	0.895	0.24	2.21e-07	cDC2-MKI67	MZT2A
1.54e-11	1.19768	0.895	0.369	2.21e-07	cDC2-MKI67	HMGN1
1.81e-11	0.391136	0.579	0.097	2.6e-07	cDC2-MKI67	PRPSAP1
2.19e-11	1.07343	1	0.725	3.13e-07	cDC2-MKI67	SLC25A5
2.26e-11	0.297953	0.526	0.081	3.23e-07	cDC2-MKI67	SRD5A3
2.5e-11	0.287383	0.421	0.056	3.57e-07	cDC2-MKI67	FAM210A
2.74e-11	0.281568	0.474	0.069	3.93e-07	cDC2-MKI67	CLECL1
2.8e-11	0.376718	0.421	0.057	4e-07	cDC2-MKI67	LRR1
4.08e-11	0.373248	0.579	0.103	5.84e-07	cDC2-MKI67	DCTPP1
4.34e-11	1.02642	0.842	0.27	6.21e-07	cDC2-MKI67	HMGA1
4.34e-11	0.562894	0.737	0.156	6.21e-07	cDC2-MKI67	FKBP3
4.47e-11	0.506363	0.474	0.074	6.4e-07	cDC2-MKI67	PSMG1
5.47e-11	0.79892	0.842	0.237	7.83e-07	cDC2-MKI67	CCT2
5.68e-11	0.42619	0.684	0.138	8.13e-07	cDC2-MKI67	VBP1
6.2e-11	0.573809	0.842	0.199	8.88e-07	cDC2-MKI67	IER3IP1
7.37e-11	1.53856	0.789	0.223	1.05e-06	cDC2-MKI67	INSIG1
8.33e-11	1.45616	0.947	0.469	1.19e-06	cDC2-MKI67	HLA-DQA1
8.81e-11	0.377663	0.368	0.047	1.26e-06	cDC2-MKI67	TMEM38B
1.19e-10	0.426393	0.737	0.154	1.7e-06	cDC2-MKI67	NUDT5
1.2e-10	0.892333	0.842	0.289	1.72e-06	cDC2-MKI67	IDH2
1.21e-10	1.25191	1	0.653	1.73e-06	cDC2-MKI67	HSPA8
1.53e-10	0.758866	0.474	0.078	2.19e-06	cDC2-MKI67	HSPA1B
1.7e-10	0.414723	0.526	0.091	2.43e-06	cDC2-MKI67	DBNDD2
2.08e-10	0.869403	0.895	0.312	2.98e-06	cDC2-MKI67	CYCS
2.09e-10	0.530065	0.737	0.166	2.99e-06	cDC2-MKI67	HSPH1
2.19e-10	0.615647	0.474	0.076	3.14e-06	cDC2-MKI67	THBD
2.21e-10	0.539948	0.842	0.206	3.16e-06	cDC2-MKI67	ELAVL1
2.48e-10	0.746304	0.737	0.183	3.54e-06	cDC2-MKI67	CARHSP1
2.67e-10	0.781115	0.684	0.155	3.82e-06	cDC2-MKI67	DDIT4
2.94e-10	1.25148	1	0.777	4.21e-06	cDC2-MKI67	HLA-DPB1
3.14e-10	0.694102	0.579	0.118	4.49e-06	cDC2-MKI67	PDE4B
3.22e-10	1.1368	0.684	0.165	4.6e-06	cDC2-MKI67	IL1B
3.37e-10	1.25849	1	0.64	4.82e-06	cDC2-MKI67	HLA-DQB1
3.56e-10	0.386861	0.421	0.062	5.09e-06	cDC2-MKI67	SAC3D1
3.7e-10	0.574116	0.789	0.195	5.3e-06	cDC2-MKI67	KIF22
4.6e-10	1.27844	0.947	0.711	6.58e-06	cDC2-MKI67	HSP90AA1
4.82e-10	0.577891	0.789	0.197	6.9e-06	cDC2-MKI67	PNP
5.02e-10	0.507603	0.632	0.126	7.18e-06	cDC2-MKI67	CLEC10A
5.11e-10	0.921982	1	0.854	7.32e-06	cDC2-MKI67	YBX1
5.21e-10	0.447995	0.632	0.128	7.45e-06	cDC2-MKI67	DERA
5.48e-10	0.398028	0.474	0.08	7.84e-06	cDC2-MKI67	NREP
5.56e-10	1.00281	0.842	0.318	7.95e-06	cDC2-MKI67	HSPD1
5.73e-10	0.734742	1	0.956	8.19e-06	cDC2-MKI67	RPLP0
6.75e-10	0.672249	0.842	0.228	9.65e-06	cDC2-MKI67	SDF2L1
7.33e-10	0.574452	0.842	0.227	1.05e-05	cDC2-MKI67	AKR7A2
8.7e-10	0.475249	0.632	0.133	1.24e-05	cDC2-MKI67	RPIA
9.47e-10	0.288711	0.474	0.077	1.35e-05	cDC2-MKI67	POLD3
9.77e-10	0.631129	0.526	0.104	1.4e-05	cDC2-MKI67	JOSD1
1.07e-09	1.14722	1	0.99	1.53e-05	cDC2-MKI67	CD74
1.13e-09	0.332257	0.579	0.109	1.62e-05	cDC2-MKI67	POLR3K
1.25e-09	0.454782	0.684	0.154	1.79e-05	cDC2-MKI67	RBBP7
1.3e-09	0.41733	0.526	0.097	1.86e-05	cDC2-MKI67	FH
1.44e-09	0.28578	0.737	0.161	2.06e-05	cDC2-MKI67	TPRKB
1.57e-09	0.253809	0.474	0.078	2.25e-05	cDC2-MKI67	ZNF124
1.76e-09	0.312943	0.579	0.111	2.51e-05	cDC2-MKI67	PHF19
2.06e-09	0.307099	0.421	0.066	2.95e-05	cDC2-MKI67	FARSB
2.12e-09	0.720148	0.684	0.191	3.03e-05	cDC2-MKI67	IGFBP7
2.36e-09	0.57528	0.737	0.192	3.38e-05	cDC2-MKI67	IMPDH2
2.57e-09	0.52763	0.526	0.099	3.67e-05	cDC2-MKI67	STT3A
2.61e-09	0.357199	0.474	0.082	3.73e-05	cDC2-MKI67	HPF1
2.71e-09	0.39371	0.526	0.1	3.87e-05	cDC2-MKI67	PAFAH1B3
2.73e-09	0.387621	0.526	0.102	3.91e-05	cDC2-MKI67	TRMT6
2.74e-09	1.22127	1	0.927	3.92e-05	cDC2-MKI67	HLA-DRA
2.82e-09	0.316401	0.474	0.081	4.03e-05	cDC2-MKI67	MIR181A1HG
2.98e-09	0.59332	0.789	0.22	4.26e-05	cDC2-MKI67	DDX39A
3.23e-09	0.251388	0.737	0.162	4.61e-05	cDC2-MKI67	PPA2
3.48e-09	0.258227	0.474	0.082	4.98e-05	cDC2-MKI67	ATIC
3.58e-09	0.297569	0.579	0.113	5.12e-05	cDC2-MKI67	TSTD1
3.77e-09	0.290886	0.421	0.068	5.4e-05	cDC2-MKI67	MAGOHB
3.9e-09	1.27615	0.947	0.819	5.58e-05	cDC2-MKI67	HLA-DPA1
4.1e-09	1.29922	0.947	0.912	5.87e-05	cDC2-MKI67	HLA-DRB1
4.47e-09	0.397763	0.158	0.012	6.39e-05	cDC2-MKI67	A2M
4.67e-09	0.369845	0.526	0.101	6.68e-05	cDC2-MKI67	GPR137B
4.89e-09	0.5747	0.789	0.21	6.99e-05	cDC2-MKI67	HSPB1
4.94e-09	0.500202	0.579	0.12	7.07e-05	cDC2-MKI67	RCN2
5.01e-09	0.400975	0.842	0.212	7.16e-05	cDC2-MKI67	POLR2K
5.65e-09	0.341651	0.474	0.085	8.08e-05	cDC2-MKI67	SLAMF7
5.71e-09	0.312453	0.316	0.042	8.17e-05	cDC2-MKI67	MAFF
5.86e-09	0.519877	0.737	0.187	8.38e-05	cDC2-MKI67	CMC2
6.21e-09	1.07574	0.737	0.228	8.88e-05	cDC2-MKI67	PPIF
6.54e-09	0.42279	0.474	0.086	9.36e-05	cDC2-MKI67	HLA-DQA2
6.58e-09	0.277908	0.632	0.134	9.41e-05	cDC2-MKI67	BZW2
6.99e-09	0.95773	1	0.537	0.0001	cDC2-MKI67	LDHA
7.87e-09	0.518121	0.579	0.129	0.000113	cDC2-MKI67	NOLC1
8.6e-09	0.28111	0.632	0.133	0.000123	cDC2-MKI67	MRPL22
8.8e-09	0.293487	0.632	0.135	0.000126	cDC2-MKI67	TSPAN3
9.87e-09	0.397379	0.474	0.089	0.000141	cDC2-MKI67	MAP3K13
9.92e-09	1.0453	0.947	0.421	0.000142	cDC2-MKI67	LITAF
1.01e-08	0.862714	1	0.801	0.000144	cDC2-MKI67	TPI1
1.18e-08	0.60137	0.789	0.244	0.000168	cDC2-MKI67	PSMC3
1.2e-08	0.287223	0.474	0.086	0.000172	cDC2-MKI67	HYOU1
1.34e-08	0.512056	0.684	0.17	0.000191	cDC2-MKI67	CSRNP1
1.47e-08	0.586382	0.842	0.261	0.00021	cDC2-MKI67	MTHFD2
1.61e-08	0.502896	0.737	0.192	0.00023	cDC2-MKI67	MATR3-1
1.64e-08	0.295638	0.684	0.155	0.000235	cDC2-MKI67	EIF2S1
1.65e-08	0.33158	0.316	0.044	0.000236	cDC2-MKI67	BAG3
1.7e-08	0.358864	0.474	0.089	0.000243	cDC2-MKI67	CHD1L
1.81e-08	0.58616	1	0.976	0.000259	cDC2-MKI67	GAPDH
1.83e-08	0.256976	0.316	0.044	0.000262	cDC2-MKI67	ANKRD37
1.87e-08	0.927474	0.947	0.415	0.000268	cDC2-MKI67	LDHB
1.88e-08	0.695754	1	0.858	0.00027	cDC2-MKI67	EEF1B2
1.89e-08	0.290037	0.579	0.121	0.00027	cDC2-MKI67	CRELD2
2.02e-08	0.30381	0.684	0.171	0.000289	cDC2-MKI67	PLD4
2.05e-08	0.316776	0.421	0.073	0.000293	cDC2-MKI67	MLH1
2.05e-08	0.296594	0.684	0.155	0.000293	cDC2-MKI67	RUNX3
2.06e-08	0.863562	0.579	0.139	0.000295	cDC2-MKI67	BCAS2
2.25e-08	0.268402	0.579	0.119	0.000322	cDC2-MKI67	MZT1
2.28e-08	0.252794	0.158	0.013	0.000326	cDC2-MKI67	ECT2
2.5e-08	0.889756	0.947	0.495	0.000358	cDC2-MKI67	CALR
2.62e-08	0.270649	0.474	0.089	0.000376	cDC2-MKI67	TENT4B
2.63e-08	0.458381	0.579	0.137	0.000376	cDC2-MKI67	GGCT
2.8e-08	1.00238	0.789	0.328	0.000401	cDC2-MKI67	HSPE1
2.89e-08	0.815314	1	0.667	0.000413	cDC2-MKI67	NPM1
3.2e-08	0.547312	0.368	0.061	0.000458	cDC2-MKI67	PRPS2
3.32e-08	0.299189	0.684	0.159	0.000475	cDC2-MKI67	MRPS11
3.35e-08	0.653322	0.947	0.363	0.000479	cDC2-MKI67	PDIA6
3.35e-08	0.532859	0.632	0.153	0.00048	cDC2-MKI67	HSPB11
3.47e-08	0.27113	0.368	0.06	0.000497	cDC2-MKI67	RBFA
3.5e-08	0.723433	0.789	0.289	0.0005	cDC2-MKI67	ILF2
3.55e-08	1.2409	1	0.99	0.000509	cDC2-MKI67	CST3
4.16e-08	0.297148	0.421	0.075	0.000595	cDC2-MKI67	FAM122B
4.19e-08	0.481179	0.526	0.115	0.0006	cDC2-MKI67	PTMS
4.32e-08	0.815379	1	0.757	0.000618	cDC2-MKI67	TAGLN2
4.44e-08	0.86934	0.895	0.376	0.000635	cDC2-MKI67	PA2G4
4.75e-08	0.979917	1	0.94	0.00068	cDC2-MKI67	H3F3B
5.19e-08	0.335013	0.263	0.034	0.000742	cDC2-MKI67	UAP1
5.49e-08	0.266405	0.526	0.107	0.000785	cDC2-MKI67	NDUFAF2
5.85e-08	0.757476	1	0.692	0.000837	cDC2-MKI67	SUB1
5.89e-08	0.310502	0.474	0.092	0.000843	cDC2-MKI67	DENND1B
6e-08	0.533264	0.684	0.184	0.000858	cDC2-MKI67	OSER1
6.05e-08	0.913229	0.895	0.557	0.000865	cDC2-MKI67	DEK
7.42e-08	0.273728	0.737	0.184	0.00106151	cDC2-MKI67	FDPS
7.47e-08	0.294284	0.526	0.11	0.00106879	cDC2-MKI67	SGTA
7.67e-08	0.75803	0.895	0.365	0.00109686	cDC2-MKI67	LSM4
8.17e-08	0.726692	0.947	0.445	0.00116901	cDC2-MKI67	BANF1
8.19e-08	0.340148	0.684	0.17	0.00117173	cDC2-MKI67	CHRAC1
8.19e-08	0.330469	0.632	0.15	0.00117228	cDC2-MKI67	IL18
8.44e-08	0.381667	0.474	0.096	0.00120714	cDC2-MKI67	BAIAP2
9.2e-08	0.681053	0.789	0.249	0.00131692	cDC2-MKI67	RHEB
9.34e-08	0.270766	0.421	0.077	0.00133586	cDC2-MKI67	NABP2
9.52e-08	0.807389	1	0.663	0.00136187	cDC2-MKI67	MIF
9.59e-08	0.507229	1	0.998	0.00137223	cDC2-MKI67	ACTB
1e-07	0.268386	0.263	0.035	0.00143273	cDC2-MKI67	METTL15
1e-07	0.766246	0.895	0.451	0.00143764	cDC2-MKI67	SNRPB
1.03e-07	0.320302	0.158	0.014	0.00147297	cDC2-MKI67	YTHDF3-AS1
1.05e-07	0.640774	0.842	0.295	0.00149844	cDC2-MKI67	SLC3A2
1.05e-07	0.952997	0.842	0.361	0.00150766	cDC2-MKI67	EZR
1.13e-07	0.436074	0.579	0.138	0.00160976	cDC2-MKI67	FNIP2
1.15e-07	0.612923	0.842	0.277	0.00164606	cDC2-MKI67	UBE2A
1.16e-07	0.440257	0.684	0.178	0.00165524	cDC2-MKI67	MRPL3
1.22e-07	0.702771	0.684	0.22	0.00174198	cDC2-MKI67	DNAJB1
1.24e-07	0.290133	0.316	0.049	0.00177502	cDC2-MKI67	UBFD1
1.39e-07	0.357696	0.526	0.113	0.00198609	cDC2-MKI67	TPGS2
1.42e-07	0.86041	0.947	0.613	0.00203566	cDC2-MKI67	HSP90AB1
1.51e-07	0.614771	0.368	0.069	0.0021552	cDC2-MKI67	ZNF331
1.53e-07	0.268756	0.211	0.024	0.00218266	cDC2-MKI67	LGALS12
1.69e-07	0.30077	0.684	0.17	0.00242039	cDC2-MKI67	SHMT2
1.85e-07	0.370469	0.632	0.154	0.00265233	cDC2-MKI67	GORASP2
2.13e-07	0.279984	0.421	0.081	0.00304747	cDC2-MKI67	NSMCE2
2.17e-07	0.276449	0.632	0.155	0.00310953	cDC2-MKI67	CISD2
2.19e-07	0.55364	0.579	0.147	0.00313673	cDC2-MKI67	SNRNP25
2.26e-07	0.392684	0.632	0.16	0.00323275	cDC2-MKI67	ARL4A
2.3e-07	0.505831	0.474	0.103	0.00329479	cDC2-MKI67	FAF1
2.38e-07	0.587662	0.947	0.449	0.00340211	cDC2-MKI67	YWHAE
2.54e-07	0.537452	0.737	0.23	0.00362779	cDC2-MKI67	LSM2
2.77e-07	0.288243	0.263	0.038	0.00395908	cDC2-MKI67	NFATC2
3.01e-07	0.724276	0.947	0.528	0.00431219	cDC2-MKI67	PDIA3
3.1e-07	0.39643	0.632	0.17	0.00444151	cDC2-MKI67	CCDC50
3.27e-07	0.462858	0.737	0.222	0.00468092	cDC2-MKI67	CXCR4
3.53e-07	0.750953	1	0.859	0.00505529	cDC2-MKI67	UBC
3.7e-07	0.380341	0.684	0.184	0.00530083	cDC2-MKI67	DEGS1
3.78e-07	0.309359	0.526	0.116	0.00540847	cDC2-MKI67	PSMG3
4.29e-07	0.62062	0.895	0.325	0.00613749	cDC2-MKI67	SMS
4.92e-07	0.680009	0.684	0.219	0.0070421	cDC2-MKI67	BASP1
5.12e-07	0.678481	0.947	0.484	0.00732502	cDC2-MKI67	EIF5A
6.29e-07	0.388288	0.211	0.026	0.00899547	cDC2-MKI67	CCL4L2
7.54e-07	0.40514	0.632	0.174	0.0107878	cDC2-MKI67	NOP58
7.54e-07	0.349831	0.684	0.188	0.010795	cDC2-MKI67	FAM111A
7.74e-07	0.418843	0.526	0.133	0.0110733	cDC2-MKI67	MANF
7.82e-07	0.418171	0.789	0.238	0.0111854	cDC2-MKI67	CYTOR
7.88e-07	0.405902	0.474	0.104	0.0112726	cDC2-MKI67	POLR2H
8.02e-07	0.418463	0.579	0.149	0.0114804	cDC2-MKI67	PRPF31
8.19e-07	0.4941	0.789	0.266	0.0117172	cDC2-MKI67	UBE2N
8.77e-07	0.410591	0.632	0.181	0.0125475	cDC2-MKI67	PSIP1
8.9e-07	0.660639	1	0.625	0.0127345	cDC2-MKI67	DBI
8.94e-07	0.271993	0.632	0.164	0.0127931	cDC2-MKI67	SMC3
9.1e-07	0.304233	0.158	0.016	0.0130238	cDC2-MKI67	S100B
9.34e-07	0.590872	0.684	0.217	0.01337	cDC2-MKI67	HDAC2
9.49e-07	0.568979	1	0.915	0.0135748	cDC2-MKI67	RPS5
9.5e-07	0.273604	0.211	0.027	0.0135997	cDC2-MKI67	ARMCX1
9.63e-07	0.691024	0.947	0.539	0.0137789	cDC2-MKI67	NCL
9.67e-07	0.32748	0.474	0.107	0.0138329	cDC2-MKI67	USP36
9.69e-07	0.509075	0.579	0.16	0.0138607	cDC2-MKI67	SH3BP5
1.04e-06	0.520397	1	0.772	0.014887	cDC2-MKI67	CALM1
1.05e-06	0.316184	0.421	0.087	0.0149682	cDC2-MKI67	NOP16
1.06e-06	0.5985	0.632	0.199	0.015214	cDC2-MKI67	SYAP1
1.08e-06	0.393088	0.684	0.198	0.0154232	cDC2-MKI67	TUBA4A
1.15e-06	0.626144	0.895	0.394	0.0165033	cDC2-MKI67	SIVA1
1.2e-06	0.692085	0.947	0.488	0.017199	cDC2-MKI67	HNRNPF
1.2e-06	0.643068	0.789	0.317	0.0172232	cDC2-MKI67	SNRPD1
1.21e-06	0.276367	0.474	0.109	0.0172513	cDC2-MKI67	EEF1E1
1.23e-06	0.369421	0.526	0.133	0.0175596	cDC2-MKI67	NFKBID
1.29e-06	0.406709	0.842	0.264	0.0184133	cDC2-MKI67	MEA1
1.31e-06	0.531615	1	0.884	0.0187124	cDC2-MKI67	RPSA
1.33e-06	0.344879	0.737	0.221	0.0189829	cDC2-MKI67	RNASEH2B
1.35e-06	0.469778	0.474	0.111	0.0193575	cDC2-MKI67	FADS1
1.38e-06	0.432934	0.684	0.208	0.019746	cDC2-MKI67	MPC2
1.39e-06	0.280137	0.632	0.168	0.0198897	cDC2-MKI67	CEP57
1.46e-06	0.486955	0.789	0.266	0.0208685	cDC2-MKI67	GSN
1.48e-06	0.347561	0.632	0.174	0.0212403	cDC2-MKI67	DNAJB11
1.52e-06	0.435069	1	0.975	0.0217099	cDC2-MKI67	PFN1
1.55e-06	0.475257	0.895	0.338	0.022179	cDC2-MKI67	HNRNPL
1.56e-06	0.68267	0.842	0.371	0.0223837	cDC2-MKI67	YWHAH
1.6e-06	0.689629	0.895	0.453	0.0228986	cDC2-MKI67	SRSF2
1.63e-06	0.691496	0.842	0.331	0.0233279	cDC2-MKI67	YWHAQ
1.66e-06	0.265888	0.684	0.185	0.0236981	cDC2-MKI67	CHCHD3
1.72e-06	0.340184	0.316	0.056	0.0245439	cDC2-MKI67	ZC3H11A
1.77e-06	0.567004	0.947	0.449	0.0252748	cDC2-MKI67	VPS29
1.81e-06	0.80811	0.895	0.424	0.0259503	cDC2-MKI67	PPP1R15A
1.82e-06	0.597241	0.842	0.309	0.0259722	cDC2-MKI67	NENF
1.85e-06	0.421188	1	0.4	0.0264401	cDC2-MKI67	PLAC8
2.04e-06	0.411376	0.684	0.211	0.0292221	cDC2-MKI67	NUDT21
2.09e-06	0.643386	0.842	0.31	0.0299547	cDC2-MKI67	XBP1
2.12e-06	0.364688	0.684	0.21	0.0302872	cDC2-MKI67	LRRC59
2.16e-06	0.648461	0.789	0.328	0.0309449	cDC2-MKI67	SELENOK
2.19e-06	0.658405	0.737	0.262	0.0313938	cDC2-MKI67	PEA15
2.22e-06	0.656559	0.842	0.34	0.0318218	cDC2-MKI67	LSM3
2.29e-06	0.545688	1	0.82	0.0327899	cDC2-MKI67	HNRNPA1
2.44e-06	0.303001	0.684	0.195	0.0348838	cDC2-MKI67	TIMM10
2.59e-06	0.533627	0.684	0.241	0.0370861	cDC2-MKI67	CACYBP
2.67e-06	0.407966	0.684	0.216	0.0382389	cDC2-MKI67	CENPX
2.77e-06	0.45392	0.842	0.3	0.0396715	cDC2-MKI67	EIF1AX
2.81e-06	0.688792	0.789	0.295	0.040266	cDC2-MKI67	EMD
2.84e-06	0.633898	1	0.664	0.0405727	cDC2-MKI67	COX5A
2.95e-06	0.364766	0.737	0.231	0.0422523	cDC2-MKI67	GTF2B
3.11e-06	0.865579	0.842	0.426	0.0444803	cDC2-MKI67	DNAJA1
3.42e-06	0.709106	0.895	0.629	0.0488705	cDC2-MKI67	UBB
3.48e-06	0.5507	1	0.8	0.0497577	cDC2-MKI67	PCBP2
3.48e-06	0.63011	0.842	0.43	0.0497642	cDC2-MKI67	RBM8A
3.5e-06	0.411145	0.684	0.213	0.0500837	cDC2-MKI67	SLBP
4.21e-06	0.294774	0.368	0.077	0.0601994	cDC2-MKI67	RFC2
4.24e-06	0.430707	0.737	0.24	0.0607021	cDC2-MKI67	FOSL2
4.27e-06	0.335159	0.684	0.211	0.0611642	cDC2-MKI67	SLC25A39
4.37e-06	0.417585	0.526	0.145	0.062488	cDC2-MKI67	GLA
4.79e-06	0.39971	0.842	0.289	0.0685022	cDC2-MKI67	CYB5R3
5.13e-06	0.539472	0.632	0.189	0.0733546	cDC2-MKI67	SNHG15
5.22e-06	0.523673	0.789	0.313	0.0747446	cDC2-MKI67	RAD21
5.26e-06	0.422461	0.526	0.144	0.0753003	cDC2-MKI67	SNX9
5.39e-06	0.475883	0.737	0.28	0.0771569	cDC2-MKI67	NUTF2
5.52e-06	0.309139	0.421	0.098	0.078926	cDC2-MKI67	RBBP8
5.98e-06	0.674398	0.895	0.448	0.0856201	cDC2-MKI67	CKLF
6.15e-06	0.250037	0.316	0.06	0.0880011	cDC2-MKI67	TCEAL3
7.04e-06	0.339498	0.632	0.184	0.100778	cDC2-MKI67	ARPC5L
7.64e-06	0.46581	0.632	0.212	0.109383	cDC2-MKI67	DNMT1
8.15e-06	0.566302	0.842	0.397	0.116667	cDC2-MKI67	CCT6A
8.25e-06	0.706464	0.947	0.702	0.118049	cDC2-MKI67	ANXA1
8.57e-06	0.391362	0.632	0.195	0.12268	cDC2-MKI67	CBWD1
8.72e-06	0.319525	0.684	0.208	0.124726	cDC2-MKI67	DDAH2
8.75e-06	0.582397	0.947	0.558	0.125177	cDC2-MKI67	HSP90B1
8.97e-06	0.370708	0.579	0.176	0.1284	cDC2-MKI67	EIF4E
9.43e-06	0.993242	0.368	0.084	0.1349	cDC2-MKI67	G0S2
1.04e-05	0.518091	0.684	0.23	0.148451	cDC2-MKI67	SUGT1
1.05e-05	0.577959	0.158	0.019	0.150357	cDC2-MKI67	TAF9B
1.09e-05	0.496452	0.684	0.238	0.156219	cDC2-MKI67	HIST1H1E
1.13e-05	0.517872	0.842	0.358	0.16118	cDC2-MKI67	ELOC
1.17e-05	0.274762	0.632	0.184	0.167163	cDC2-MKI67	TIMM17A
1.2e-05	0.713666	0.789	0.359	0.171369	cDC2-MKI67	TMEM14C
1.23e-05	0.679765	0.947	0.947	0.175797	cDC2-MKI67	SRGN
1.23e-05	0.751484	0.789	0.36	0.176065	cDC2-MKI67	KLF4
1.24e-05	0.429752	0.895	0.362	0.177751	cDC2-MKI67	BZW1
1.26e-05	0.279254	0.421	0.102	0.179879	cDC2-MKI67	TCEAL4
1.32e-05	0.397426	0.421	0.108	0.18864	cDC2-MKI67	EBNA1BP2
1.34e-05	0.255817	0.579	0.16	0.19107	cDC2-MKI67	POP5
1.37e-05	0.587904	1	0.738	0.19633	cDC2-MKI67	CRIP1
1.41e-05	0.496831	0.789	0.33	0.201117	cDC2-MKI67	TOMM5
1.43e-05	0.419235	0.684	0.238	0.204875	cDC2-MKI67	PIM3
1.46e-05	0.396124	1	0.962	0.208678	cDC2-MKI67	RPS21
1.48e-05	0.34248	1	0.993	0.211499	cDC2-MKI67	TMSB10
1.51e-05	0.436004	0.684	0.252	0.215954	cDC2-MKI67	NANS
1.51e-05	0.271565	0.421	0.102	0.216644	cDC2-MKI67	TOPBP1
1.58e-05	0.272966	0.421	0.101	0.226506	cDC2-MKI67	ERI3
1.6e-05	0.265003	0.579	0.171	0.228584	cDC2-MKI67	SSRP1
1.65e-05	0.39667	0.579	0.178	0.236788	cDC2-MKI67	SLC25A1
1.69e-05	0.570357	0.842	0.381	0.241631	cDC2-MKI67	SNRPF
1.69e-05	0.34467	0.842	0.306	0.24198	cDC2-MKI67	NDUFB6
1.72e-05	0.579837	0.895	0.609	0.246023	cDC2-MKI67	ANP32B
1.79e-05	0.657207	0.737	0.347	0.256488	cDC2-MKI67	NFE2L2
1.8e-05	0.255186	0.474	0.124	0.256939	cDC2-MKI67	WDR18
1.88e-05	0.600936	0.632	0.238	0.268864	cDC2-MKI67	KDM6B
1.95e-05	0.674649	0.526	0.168	0.279628	cDC2-MKI67	NEU1
2.03e-05	0.374748	0.842	0.325	0.29048	cDC2-MKI67	TMPO
2.07e-05	0.622129	0.947	0.574	0.296739	cDC2-MKI67	SET
2.08e-05	0.783437	0.211	0.033	0.297451	cDC2-MKI67	C1QB
2.11e-05	0.462863	1	0.985	0.301909	cDC2-MKI67	VIM
2.14e-05	0.348065	0.632	0.207	0.30642	cDC2-MKI67	HINT2
2.16e-05	0.400143	0.789	0.287	0.308522	cDC2-MKI67	2021-09-06
2.29e-05	0.296721	0.474	0.124	0.327223	cDC2-MKI67	MCUR1
2.38e-05	0.834607	0.842	0.575	0.339982	cDC2-MKI67	TUBA1A
2.53e-05	0.259007	0.211	0.034	0.362329	cDC2-MKI67	E2F6
2.73e-05	0.438216	0.632	0.221	0.390363	cDC2-MKI67	CHMP1B
2.75e-05	0.548473	0.947	0.659	0.393976	cDC2-MKI67	NDUFA4
2.92e-05	0.47381	0.474	0.145	0.417202	cDC2-MKI67	ODC1
2.95e-05	0.321207	0.579	0.177	0.422331	cDC2-MKI67	RALA
3.07e-05	0.289533	0.579	0.176	0.43931	cDC2-MKI67	ZNF267
3.38e-05	0.507556	0.579	0.195	0.483877	cDC2-MKI67	FDX1
3.45e-05	0.544643	0.947	0.625	0.493577	cDC2-MKI67	HLA-DMA
3.72e-05	0.268403	0.632	0.197	0.532204	cDC2-MKI67	PARP1
3.82e-05	0.268288	0.263	0.051	0.546	cDC2-MKI67	ORC3
3.93e-05	0.593036	0.947	0.455	0.562521	cDC2-MKI67	RPN1
3.96e-05	0.262532	0.474	0.13	0.566066	cDC2-MKI67	COQ10B
3.97e-05	0.327845	0.737	0.263	0.567785	cDC2-MKI67	CCT7
4.06e-05	0.512399	0.684	0.259	0.581492	cDC2-MKI67	VDAC3
4.27e-05	0.539318	0.684	0.274	0.610243	cDC2-MKI67	BCL3
4.41e-05	0.278519	0.526	0.152	0.631373	cDC2-MKI67	MAPKAP1
4.5e-05	0.331813	0.526	0.156	0.644455	cDC2-MKI67	METRNL
4.66e-05	0.624352	0.842	0.437	0.666772	cDC2-MKI67	HERPUD1
4.67e-05	0.286987	0.579	0.181	0.667806	cDC2-MKI67	CPSF6
4.68e-05	0.305838	0.632	0.208	0.669398	cDC2-MKI67	PHF5A
4.8e-05	0.530012	0.895	0.557	0.687359	cDC2-MKI67	HNRNPA3
4.93e-05	0.50293	0.947	0.645	0.705194	cDC2-MKI67	SNX3
4.94e-05	0.48042	0.789	0.325	0.707347	cDC2-MKI67	DCXR
5.04e-05	0.290599	0.579	0.185	0.720757	cDC2-MKI67	NAP1L4
5.22e-05	0.583174	0.842	0.508	0.746751	cDC2-MKI67	SNRPG
5.51e-05	0.263555	0.474	0.133	0.788251	cDC2-MKI67	MRPS14
5.6e-05	0.358841	0.842	0.325	0.801885	cDC2-MKI67	SEC13
5.62e-05	0.332667	0.263	0.053	0.804369	cDC2-MKI67	PRMT5
5.67e-05	0.355054	0.684	0.246	0.810599	cDC2-MKI67	TMX1
5.77e-05	0.343427	0.684	0.241	0.825907	cDC2-MKI67	ECHS1
5.79e-05	0.433188	0.474	0.146	0.828827	cDC2-MKI67	NME4
6.08e-05	0.374588	0.789	0.313	0.870603	cDC2-MKI67	SLC38A2
6.11e-05	0.318803	0.579	0.182	0.874331	cDC2-MKI67	RCC2
6.23e-05	0.645945	0.895	0.538	0.891637	cDC2-MKI67	PTGES3
6.43e-05	0.483323	1	0.698	0.920133	cDC2-MKI67	PSME2
6.44e-05	0.289573	0.421	0.111	0.921292	cDC2-MKI67	DESI2
6.62e-05	0.476019	0.632	0.232	0.947298	cDC2-MKI67	ETS2
6.63e-05	0.413135	0.474	0.142	0.94881	cDC2-MKI67	UBE2S
7.31e-05	0.403714	0.842	0.393	1	cDC2-MKI67	SRSF10
7.87e-05	0.304953	0.632	0.213	1	cDC2-MKI67	BX284668.5
8.08e-05	0.613929	0.842	0.401	1	cDC2-MKI67	JPT1
8.11e-05	0.324357	0.737	0.272	1	cDC2-MKI67	COPS6
8.27e-05	0.366877	0.684	0.254	1	cDC2-MKI67	MAPRE1
8.31e-05	0.49333	0.947	0.564	1	cDC2-MKI67	POMP
8.33e-05	0.371002	0.368	0.091	1	cDC2-MKI67	TSEN15
8.4e-05	1.22515	0.947	0.676	1	cDC2-MKI67	HLA-DRB5
8.62e-05	0.577408	0.789	0.384	1	cDC2-MKI67	HSPA5
8.64e-05	0.467314	0.684	0.267	1	cDC2-MKI67	MLEC
8.9e-05	0.499339	1	0.539	1	cDC2-MKI67	TXN
9.15e-05	0.441382	0.368	0.095	1	cDC2-MKI67	MED19
9.38e-05	0.321467	0.684	0.248	1	cDC2-MKI67	ATXN10
0.000102	0.737884	0.158	0.023	1	cDC2-MKI67	C1QC
0.000105	0.390698	0.737	0.284	1	cDC2-MKI67	SNRPA
0.000109	0.403646	0.842	0.377	1	cDC2-MKI67	RNPS1
[truncated: 3,270 more rows]

## Sheet: NK
p_val	avg_logFC	pct.1	pct.2	p_val_adj	cluster	gene
0	1.5784	0.902	0.321	0	NK_c01-GZMK	FAM177A1
0	1.5636	0.689	0.23	0	NK_c01-GZMK	XCL1
0	1.53264	0.793	0.206	0	NK_c01-GZMK	ZNF331
0	1.52329	0.873	0.336	0	NK_c01-GZMK	YPEL5
0	1.46664	0.906	0.361	0	NK_c01-GZMK	NR4A2
0	1.44376	0.759	0.11	0	NK_c01-GZMK	GZMK
0	1.43325	0.812	0.301	0	NK_c01-GZMK	HSPD1
0	1.42898	0.674	0.079	0	NK_c01-GZMK	PDE4B
0	1.37015	0.68	0.203	0	NK_c01-GZMK	NFKB1
0	1.35214	0.362	0.085	0	NK_c01-GZMK	BCL2A1
0	1.34947	0.532	0.118	0	NK_c01-GZMK	RGCC
0	1.34664	0.865	0.41	0	NK_c01-GZMK	REL
0	1.29249	0.486	0.044	0	NK_c01-GZMK	GRAMD2B
0	1.29147	0.452	0.03	0	NK_c01-GZMK	CXCR6
0	1.28248	0.388	0.091	0	NK_c01-GZMK	CD83
0	1.26604	0.626	0.2	0	NK_c01-GZMK	RANBP2
0	1.25515	0.591	0.11	0	NK_c01-GZMK	KDM6B
0	1.18421	0.664	0.29	0	NK_c01-GZMK	ATP1B3
0	1.16689	0.647	0.201	0	NK_c01-GZMK	PTP4A1
0	1.15511	0.866	0.464	0	NK_c01-GZMK	HSPE1
0	1.1493	0.776	0.375	0	NK_c01-GZMK	CEMIP2
0	1.13082	0.883	0.449	0	NK_c01-GZMK	PIK3R1
0	1.12855	0.919	0.654	0	NK_c01-GZMK	ZFP36
0	1.08786	0.251	0.065	0	NK_c01-GZMK	CRTAM
0	1.08518	0.602	0.144	0	NK_c01-GZMK	NR4A3
0	1.06614	0.572	0.177	0	NK_c01-GZMK	MYADM
0	1.0645	0.525	0.103	0	NK_c01-GZMK	IRF8
0	1.05749	0.853	0.539	0	NK_c01-GZMK	ADGRE5
0	1.05747	0.81	0.334	0	NK_c01-GZMK	FOSL2
0	1.05609	0.941	0.642	0	NK_c01-GZMK	HSP90AB1
0	1.05512	0.67	0.336	0	NK_c01-GZMK	TUBA4A
0	1.04438	0.511	0.091	0	NK_c01-GZMK	B3GNT7
0	1.03974	0.592	0.302	0	NK_c01-GZMK	XCL2
0	1.03946	0.521	0.12	0	NK_c01-GZMK	TNFSF14
0	1.02581	0.655	0.214	0	NK_c01-GZMK	AREG
0	1.02197	0.529	0.146	0	NK_c01-GZMK	IFRD1
0	1.00985	0.55	0.112	0	NK_c01-GZMK	CSRNP1
0	1.00862	0.84	0.411	0	NK_c01-GZMK	DUSP1
0	1.00411	0.839	0.413	0	NK_c01-GZMK	VPS37B
0	0.994637	0.82	0.399	0	NK_c01-GZMK	DNAJA1
0	0.994303	0.435	0.091	0	NK_c01-GZMK	NR4A1
0	0.986813	0.545	0.125	0	NK_c01-GZMK	COTL1
0	0.979507	0.375	0.096	0	NK_c01-GZMK	KRT86
0	0.977029	0.416	0.058	0	NK_c01-GZMK	PFKFB3
0	0.972367	0.417	0.087	0	NK_c01-GZMK	ICAM1
0	0.971577	0.758	0.415	0	NK_c01-GZMK	NFKBIA
0	0.964988	0.187	0.02	0	NK_c01-GZMK	MYC
0	0.962521	0.642	0.232	0	NK_c01-GZMK	EML4
0	0.940245	0.737	0.374	0	NK_c01-GZMK	GADD45B
0	0.93884	0.351	0.049	0	NK_c01-GZMK	RBBP8
0	0.925503	0.543	0.219	0	NK_c01-GZMK	FASLG
0	0.925241	0.581	0.176	0	NK_c01-GZMK	RELB
0	0.920148	0.577	0.167	0	NK_c01-GZMK	SKIL
0	0.914139	0.281	0.074	0	NK_c01-GZMK	LMNA
0	0.91212	0.964	0.824	0	NK_c01-GZMK	PABPC1
0	0.91104	0.629	0.2	0	NK_c01-GZMK	TENT5C
0	0.895332	0.485	0.104	0	NK_c01-GZMK	ELL2
0	0.893537	0.922	0.427	0	NK_c01-GZMK	CREM
0	0.893225	0.361	0.028	0	NK_c01-GZMK	TOX2
0	0.892834	0.466	0.122	0	NK_c01-GZMK	TIPARP
0	0.889154	0.793	0.443	0	NK_c01-GZMK	MCL1
0	0.886532	0.492	0.14	0	NK_c01-GZMK	USP36
0	0.868973	0.946	0.797	0	NK_c01-GZMK	HSP90AA1
0	0.865984	0.631	0.246	0	NK_c01-GZMK	CLDND1
0	0.865699	0.867	0.519	0	NK_c01-GZMK	SYTL3
0	0.864488	0.647	0.225	0	NK_c01-GZMK	BCL3
0	0.850351	0.996	0.97	0	NK_c01-GZMK	SRGN
0	0.848502	0.142	0.007	0	NK_c01-GZMK	CSF2
0	0.844303	0.68	0.372	0	NK_c01-GZMK	EZR
0	0.841536	0.469	0.124	0	NK_c01-GZMK	STX11
0	0.833512	0.862	0.605	0	NK_c01-GZMK	LDHA
0	0.831822	0.534	0.181	0	NK_c01-GZMK	SLC16A3
0	0.831089	0.422	0.086	0	NK_c01-GZMK	FOSB
0	0.817543	0.49	0.18	0	NK_c01-GZMK	HSPH1
0	0.815231	0.701	0.35	0	NK_c01-GZMK	LEPROTL1
0	0.812357	0.455	0.115	0	NK_c01-GZMK	PRR7
0	0.809227	0.53	0.198	0	NK_c01-GZMK	SATB1
0	0.809195	0.859	0.575	0	NK_c01-GZMK	IL2RB
0	0.805058	0.532	0.187	0	NK_c01-GZMK	SERTAD1
0	0.801646	0.845	0.552	0	NK_c01-GZMK	SRSF7
0	0.80033	0.818	0.473	0	NK_c01-GZMK	SFPQ
0	0.792434	0.343	0.056	0	NK_c01-GZMK	LZTFL1
0	0.792197	0.664	0.298	0	NK_c01-GZMK	SYAP1
0	0.791431	0.469	0.138	0	NK_c01-GZMK	PDE7A
0	0.790927	0.445	0.125	0	NK_c01-GZMK	FBXO34
0	0.788549	0.975	0.882	0	NK_c01-GZMK	HSPA8
0	0.786788	0.708	0.356	0	NK_c01-GZMK	PDCD4
0	0.782831	0.37	0.115	0	NK_c01-GZMK	BIRC3
0	0.781783	0.816	0.525	0	NK_c01-GZMK	SRSF2
0	0.779877	0.419	0.15	0	NK_c01-GZMK	NINJ1
0	0.779604	0.233	0.056	0	NK_c01-GZMK	THAP2
0	0.776742	0.284	0.021	0	NK_c01-GZMK	ADGRG3
0	0.77521	0.986	0.877	0	NK_c01-GZMK	CD7
0	0.772836	0.674	0.336	0	NK_c01-GZMK	SDCBP
0	0.771803	0.627	0.249	0	NK_c01-GZMK	CD160
0	0.764205	0.61	0.238	0	NK_c01-GZMK	JUND
0	0.75755	0.386	0.119	0	NK_c01-GZMK	PIM3
0	0.743315	0.659	0.317	0	NK_c01-GZMK	IFNGR1
0	0.740892	0.652	0.307	0	NK_c01-GZMK	TUBB4B
0	0.738789	0.582	0.275	0	NK_c01-GZMK	CCND2
0	0.730298	0.68	0.367	0	NK_c01-GZMK	RBM38
0	0.730128	0.518	0.232	0	NK_c01-GZMK	ELOVL5
0	0.728697	0.421	0.118	0	NK_c01-GZMK	SLC7A5
0	0.728258	0.953	0.796	0	NK_c01-GZMK	SARAF
0	0.727128	0.366	0.122	0	NK_c01-GZMK	TWISTNB
0	0.727101	0.571	0.294	0	NK_c01-GZMK	IDI1
0	0.719099	0.872	0.545	0	NK_c01-GZMK	DUSP2
0	0.718687	0.497	0.184	0	NK_c01-GZMK	RALGAPA1
0	0.716528	0.391	0.115	0	NK_c01-GZMK	HCG18
0	0.713481	0.424	0.142	0	NK_c01-GZMK	KPNA2
0	0.712334	0.427	0.145	0	NK_c01-GZMK	CASP3
0	0.711241	0.99	0.924	0	NK_c01-GZMK	BTG1
0	0.709354	0.329	0.074	0	NK_c01-GZMK	ARL4A
0	0.705931	0.821	0.57	0	NK_c01-GZMK	SQSTM1
0	0.703485	0.825	0.448	0	NK_c01-GZMK	CXCR4
0	0.700379	0.834	0.556	0	NK_c01-GZMK	FYN
0	0.698059	0.207	0.03	0	NK_c01-GZMK	KRT81
0	0.697517	0.396	0.117	0	NK_c01-GZMK	OTULIN
0	0.686917	0.464	0.17	0	NK_c01-GZMK	JMJD6
0	0.685788	0.504	0.188	0	NK_c01-GZMK	SOCS1
0	0.684842	0.632	0.409	0	NK_c01-GZMK	CEBPD
0	0.682203	0.536	0.273	0	NK_c01-GZMK	TIGIT
0	0.680008	0.793	0.514	0	NK_c01-GZMK	SELENOK
0	0.678762	0.995	0.968	0	NK_c01-GZMK	H3F3B
0	0.677809	0.289	0.049	0	NK_c01-GZMK	2021-03-03
0	0.677355	0.392	0.116	0	NK_c01-GZMK	NFKB2
0	0.677277	0.29	0.054	0	NK_c01-GZMK	BCL2L11
0	0.676932	0.549	0.259	0	NK_c01-GZMK	MOB4
0	0.674211	0.332	0.066	0	NK_c01-GZMK	IL12RB2
0	0.673882	0.336	0.087	0	NK_c01-GZMK	DENND4A
0	0.67242	0.652	0.344	0	NK_c01-GZMK	SLC38A1
0	0.668583	0.414	0.141	0	NK_c01-GZMK	ZC3H12A
0	0.667115	0.722	0.423	0	NK_c01-GZMK	ARHGAP9
0	0.667007	0.421	0.202	0	NK_c01-GZMK	INSIG1
0	0.661376	0.458	0.162	0	NK_c01-GZMK	ETF1
0	0.655633	0.38	0.119	0	NK_c01-GZMK	RGS1
0	0.653881	0.793	0.555	0	NK_c01-GZMK	HSPA5
0	0.651475	0.44	0.17	0	NK_c01-GZMK	LMNB1
0	0.650746	0.609	0.301	0	NK_c01-GZMK	ARF4
0	0.649988	0.426	0.165	0	NK_c01-GZMK	RAB11FIP1
0	0.64985	0.697	0.406	0	NK_c01-GZMK	MAP3K8
0	0.647471	0.613	0.318	0	NK_c01-GZMK	RAB8B
0	0.647115	0.505	0.237	0	NK_c01-GZMK	SURF4
0	0.643581	0.543	0.263	0	NK_c01-GZMK	CHD1
0	0.643434	0.348	0.128	0	NK_c01-GZMK	DDX3Y
0	0.642908	0.717	0.413	0	NK_c01-GZMK	EMD
0	0.63657	0.428	0.183	0	NK_c01-GZMK	H2AFJ
0	0.63278	0.344	0.128	0	NK_c01-GZMK	PLIN2
0	0.631881	0.794	0.518	0	NK_c01-GZMK	BZW1
0	0.629374	0.753	0.461	0	NK_c01-GZMK	DNAJB6
0	0.62852	0.661	0.398	0	NK_c01-GZMK	TPM4
0	0.628117	0.199	0.044	0	NK_c01-GZMK	HES4
0	0.622589	0.4	0.153	0	NK_c01-GZMK	GPCPD1
0	0.622482	0.603	0.219	0	NK_c01-GZMK	FOS
0	0.620644	0.316	0.123	0	NK_c01-GZMK	TSPYL2
0	0.619843	0.594	0.383	0	NK_c01-GZMK	TAGAP
0	0.613401	0.225	0.058	0	NK_c01-GZMK	NFKBID
0	0.611916	0.491	0.223	0	NK_c01-GZMK	MAT2A
0	0.604789	0.36	0.134	0	NK_c01-GZMK	NFKBIZ
0	0.597932	0.344	0.129	0	NK_c01-GZMK	FEZ1
0	0.597297	0.901	0.767	0	NK_c01-GZMK	GSTP1
0	0.595252	0.239	0.062	0	NK_c01-GZMK	TRAF1
0	0.591447	0.408	0.189	0	NK_c01-GZMK	CHMP1B
0	0.590209	0.371	0.117	0	NK_c01-GZMK	PDE4A
0	0.589269	0.645	0.381	0	NK_c01-GZMK	STAT4
0	0.586357	0.865	0.706	0	NK_c01-GZMK	TAGLN2
0	0.58482	0.237	0.039	0	NK_c01-GZMK	HIC1
0	0.58346	0.564	0.297	0	NK_c01-GZMK	CCNH
0	0.583182	0.295	0.077	0	NK_c01-GZMK	PGRMC2
0	0.582222	0.4	0.165	0	NK_c01-GZMK	SEC14L1
0	0.578682	0.461	0.206	0	NK_c01-GZMK	KLRC1
0	0.573257	0.286	0.072	0	NK_c01-GZMK	ELMSAN1
0	0.569397	0.273	0.067	0	NK_c01-GZMK	GPR18
0	0.568671	0.201	0.021	0	NK_c01-GZMK	SPRY1
0	0.565197	0.542	0.287	0	NK_c01-GZMK	DDX3X
0	0.561949	0.384	0.172	0	NK_c01-GZMK	DUSP5
0	0.561622	0.539	0.286	0	NK_c01-GZMK	LAT2
0	0.560044	0.667	0.359	0	NK_c01-GZMK	NFE2L2
0	0.556599	0.543	0.269	0	NK_c01-GZMK	CSNK1D
0	0.549947	0.275	0.064	0	NK_c01-GZMK	MAP1LC3A
0	0.54759	0.831	0.622	0	NK_c01-GZMK	ALOX5AP
0	0.547454	0.436	0.199	0	NK_c01-GZMK	PLEKHA2
0	0.545772	0.329	0.112	0	NK_c01-GZMK	BRAF
0	0.543052	0.349	0.134	0	NK_c01-GZMK	ALG13
0	0.54236	0.457	0.2	0	NK_c01-GZMK	EIF4A3
0	0.537954	0.464	0.227	0	NK_c01-GZMK	NOP58
0	0.537679	0.37	0.182	0	NK_c01-GZMK	GATA3
0	0.535224	0.505	0.28	0	NK_c01-GZMK	G3BP2
0	0.534925	0.194	0.014	0	NK_c01-GZMK	ADAMTS17
0	0.533671	0.304	0.09	0	NK_c01-GZMK	DCTN6
0	0.532743	0.367	0.158	0	NK_c01-GZMK	BIRC2
0	0.531064	0.36	0.138	0	NK_c01-GZMK	PPP1R16B
0	0.529013	0.192	0.012	0	NK_c01-GZMK	CCRL2
0	0.523366	0.564	0.332	0	NK_c01-GZMK	CD38
0	0.521411	0.45	0.211	0	NK_c01-GZMK	UBE2S
0	0.518479	0.256	0.065	0	NK_c01-GZMK	CTDP1
0	0.51736	0.372	0.153	0	NK_c01-GZMK	PPP1R10
0	0.517068	0.3	0.107	0	NK_c01-GZMK	PABPC4
0	0.514972	0.47	0.245	0	NK_c01-GZMK	GYG1
0	0.514216	0.548	0.307	0	NK_c01-GZMK	RPL22L1
0	0.513008	0.325	0.122	0	NK_c01-GZMK	MAFF
0	0.512267	0.371	0.143	0	NK_c01-GZMK	JOSD1
0	0.508687	0.452	0.24	0	NK_c01-GZMK	B4GALT1
0	0.506629	0.529	0.309	0	NK_c01-GZMK	PTPN22
0	0.505906	0.769	0.551	0	NK_c01-GZMK	ATP6V0C
0	0.504716	0.332	0.122	0	NK_c01-GZMK	CRYBG1
0	0.504164	0.754	0.544	0	NK_c01-GZMK	ARF6
0	0.504003	0.202	0.029	0	NK_c01-GZMK	MICAL2
0	0.503509	0.282	0.087	0	NK_c01-GZMK	CCDC93
0	0.503344	0.372	0.155	0	NK_c01-GZMK	H2AFX
0	0.501407	0.412	0.19	0	NK_c01-GZMK	PPP1CB
0	0.501066	0.263	0.092	0	NK_c01-GZMK	CDKN1A
0	0.500552	0.346	0.151	0	NK_c01-GZMK	TRIM28
0	0.499859	0.489	0.271	0	NK_c01-GZMK	PTGER4
0	0.499608	0.288	0.093	0	NK_c01-GZMK	TGIF1
0	0.498149	0.226	0.032	0	NK_c01-GZMK	LDB2
0	0.49688	0.734	0.485	0	NK_c01-GZMK	BRD2
0	0.494443	0.5	0.259	0	NK_c01-GZMK	GABARAPL1
0	0.49354	0.42	0.212	0	NK_c01-GZMK	ISCA1
0	0.493044	0.225	0.065	0	NK_c01-GZMK	SC5D
0	0.489555	0.942	0.884	0	NK_c01-GZMK	UBB
0	0.486763	0.58	0.361	0	NK_c01-GZMK	STK17B
0	0.486376	0.453	0.238	0	NK_c01-GZMK	MAP2K3
0	0.484804	0.466	0.251	0	NK_c01-GZMK	SH2D1A
0	0.484166	0.27	0.107	0	NK_c01-GZMK	GNL3
0	0.483921	0.213	0.039	0	NK_c01-GZMK	CYSTM1
0	0.483205	0.233	0.073	0	NK_c01-GZMK	TCTN3
0	0.481779	0.567	0.357	0	NK_c01-GZMK	ARID4B
0	0.481532	0.852	0.678	0	NK_c01-GZMK	NCL
0	0.480197	0.677	0.464	0	NK_c01-GZMK	DDX24
0	0.479859	0.129	0.003	0	NK_c01-GZMK	SCX
0	0.478617	0.677	0.47	0	NK_c01-GZMK	EIF4G2
0	0.478267	0.841	0.686	0	NK_c01-GZMK	CALM2
0	0.474455	0.859	0.749	0	NK_c01-GZMK	TGFB1
0	0.472763	0.482	0.275	0	NK_c01-GZMK	LPXN
0	0.470302	0.529	0.305	0	NK_c01-GZMK	GPBP1
0	0.467673	0.464	0.244	0	NK_c01-GZMK	BCAS2
0	0.467525	0.638	0.43	0	NK_c01-GZMK	ELF1
0	0.46664	0.311	0.135	0	NK_c01-GZMK	TESC
0	0.466351	0.182	0.053	0	NK_c01-GZMK	IRF4
0	0.466235	0.218	0.054	0	NK_c01-GZMK	ZHX2
0	0.463972	0.334	0.135	0	NK_c01-GZMK	SEC23B
0	0.463508	0.372	0.152	0	NK_c01-GZMK	METRNL
0	0.461904	0.284	0.097	0	NK_c01-GZMK	NAMPT
0	0.46159	0.511	0.291	0	NK_c01-GZMK	CD96
0	0.46142	0.253	0.076	0	NK_c01-GZMK	TLE1
0	0.459125	0.701	0.496	0	NK_c01-GZMK	KMT2E
0	0.457928	0.523	0.295	0	NK_c01-GZMK	HSPA9
0	0.457219	0.345	0.142	0	NK_c01-GZMK	NUP98
0	0.448935	0.266	0.094	0	NK_c01-GZMK	ANKRD37
0	0.446537	0.93	0.905	0	NK_c01-GZMK	UBC
0	0.444392	0.244	0.071	0	NK_c01-GZMK	SPART
0	0.443536	0.132	0.012	0	NK_c01-GZMK	ENTPD1
0	0.438382	0.186	0.035	0	NK_c01-GZMK	CHPT1
0	0.438019	0.232	0.065	0	NK_c01-GZMK	STAM
0	0.437087	0.237	0.08	0	NK_c01-GZMK	AHI1
0	0.436766	0.678	0.494	0	NK_c01-GZMK	SRSF3
0	0.435396	0.307	0.133	0	NK_c01-GZMK	ZBTB16
0	0.430722	0.444	0.238	0	NK_c01-GZMK	DNTTIP2
0	0.430455	0.219	0.064	0	NK_c01-GZMK	CMTM7
0	0.425928	0.267	0.098	0	NK_c01-GZMK	RBKS
0	0.425685	0.926	0.847	0	NK_c01-GZMK	DDX5
0	0.424804	0.439	0.235	0	NK_c01-GZMK	TCIRG1
0	0.424669	0.707	0.487	0	NK_c01-GZMK	CD69
0	0.422345	0.564	0.355	0	NK_c01-GZMK	STRAP
0	0.420366	0.798	0.621	0	NK_c01-GZMK	SLC25A3
0	0.416771	0.646	0.404	0	NK_c01-GZMK	TNFAIP3
0	0.416364	0.165	0.021	0	NK_c01-GZMK	CHKA
0	0.41591	0.185	0.034	0	NK_c01-GZMK	HDAC9
0	0.415142	0.208	0.061	0	NK_c01-GZMK	AC027290.1
0	0.412153	0.26	0.102	0	NK_c01-GZMK	LIMS1
0	0.411755	0.193	0.052	0	NK_c01-GZMK	SIPA1L1
0	0.410652	0.28	0.115	0	NK_c01-GZMK	DHRS3
0	0.408816	0.242	0.075	0	NK_c01-GZMK	TRAPPC2B
0	0.406419	0.194	0.054	0	NK_c01-GZMK	PAK1
0	0.402404	0.888	0.618	0	NK_c01-GZMK	FCER1G
0	0.402382	0.195	0.05	0	NK_c01-GZMK	TCF7
0	0.401727	0.134	0.018	0	NK_c01-GZMK	ZDBF2
0	0.399561	0.166	0.029	0	NK_c01-GZMK	SERPINE2
0	0.396783	0.188	0.05	0	NK_c01-GZMK	TNFRSF4
0	0.396492	0.934	0.86	0	NK_c01-GZMK	YWHAZ
0	0.390755	0.199	0.053	0	NK_c01-GZMK	CHN2
0	0.381131	0.176	0.045	0	NK_c01-GZMK	ZFY
0	0.372852	0.994	0.99	0	NK_c01-GZMK	PTMA
0	0.366702	0.162	0.035	0	NK_c01-GZMK	SOCS3
0	0.362826	0.107	0.014	0	NK_c01-GZMK	GADD45G
0	0.357845	0.149	0.028	0	NK_c01-GZMK	SPAG1
0	0.35578	0.141	0.029	0	NK_c01-GZMK	BCL6
0	0.353768	0.988	0.976	0	NK_c01-GZMK	EIF1
0	0.351499	0.149	0.035	0	NK_c01-GZMK	NCF1
0	0.347706	0.836	0.723	0	NK_c01-GZMK	SKP1
0	0.338997	0.165	0.044	0	NK_c01-GZMK	SEC24A
0	0.321693	0.541	0.319	0	NK_c01-GZMK	DNAJB1
0	0.31462	0.122	0.015	0	NK_c01-GZMK	SPAG4
0	0.312183	0.145	0.034	0	NK_c01-GZMK	TRIM39
0	0.305641	0.112	0.017	0	NK_c01-GZMK	FLNB
0	0.280626	0.109	0.013	0	NK_c01-GZMK	AC009404.1
0	0.274283	0.114	0.02	0	NK_c01-GZMK	STRBP
5.30153e-308	0.427118	0.334	0.153	7.3108e-304	NK_c01-GZMK	RNF168
7.32952e-308	0.300512	0.108	0.018	1.01074e-303	NK_c01-GZMK	GPR35
4.93857e-307	0.374456	0.187	0.058	6.81029e-303	NK_c01-GZMK	SIK3
5.88156e-306	0.437057	0.53	0.322	8.11067e-302	NK_c01-GZMK	EIF4A1
8.39938e-305	0.445079	0.349	0.165	1.15827e-300	NK_c01-GZMK	PLCG2
7.96655e-302	0.398922	0.654	0.444	1.09859e-297	NK_c01-GZMK	TNFRSF1B
9.02132e-301	0.266037	0.106	0.018	1.24404e-296	NK_c01-GZMK	ARHGAP31
5.95052e-300	0.29265	0.14	0.033	8.20577e-296	NK_c01-GZMK	DZIP3
1.1564e-299	0.388936	0.639	0.428	1.59467e-295	NK_c01-GZMK	UBE2B
2.76077e-298	0.427692	0.675	0.492	3.8071e-294	NK_c01-GZMK	NDUFS5
3.9056e-298	0.365146	0.215	0.075	5.38582e-294	NK_c01-GZMK	RARA
4.52301e-297	0.445771	0.53	0.324	6.23724e-293	NK_c01-GZMK	SMAP2
8.41746e-296	0.407908	0.246	0.096	1.16077e-291	NK_c01-GZMK	LRRC47
3.4345e-294	0.449706	0.644	0.462	4.73618e-290	NK_c01-GZMK	CYCS
1.27386e-292	0.364072	0.236	0.088	1.75666e-288	NK_c01-GZMK	TENT4B
1.07911e-291	0.408895	0.679	0.495	1.48809e-287	NK_c01-GZMK	CDC42SE1
2.15093e-288	0.317632	0.151	0.041	2.96613e-284	NK_c01-GZMK	HIVEP2
3.59096e-288	0.454803	0.562	0.366	4.95194e-284	NK_c01-GZMK	HNRNPUL1
3.22788e-287	0.330647	0.673	0.495	4.45125e-283	NK_c01-GZMK	HIST1H4C
6.32456e-286	0.400858	0.324	0.151	8.72156e-282	NK_c01-GZMK	NXT1
6.568e-285	0.363133	0.183	0.059	9.05728e-281	NK_c01-GZMK	DHCR7
1.15701e-281	0.455216	0.463	0.266	1.59551e-277	NK_c01-GZMK	CDK17
5.8265e-280	0.451618	0.399	0.215	8.03475e-276	NK_c01-GZMK	GSPT1
1.6133e-279	0.430271	0.435	0.246	2.22474e-275	NK_c01-GZMK	DDX21
2.08485e-279	0.391832	0.386	0.199	2.875e-275	NK_c01-GZMK	PPP1R15A
8.23284e-279	0.384727	0.288	0.127	1.13531e-274	NK_c01-GZMK	PAF1
1.00192e-278	0.40611	0.226	0.085	1.38164e-274	NK_c01-GZMK	TNFRSF18
8.33553e-278	0.371328	0.253	0.102	1.14947e-273	NK_c01-GZMK	ABCB1
1.32642e-276	0.368216	0.735	0.554	1.82913e-272	NK_c01-GZMK	FUS
8.53636e-273	0.395994	0.293	0.133	1.17716e-268	NK_c01-GZMK	EI24
2.78947e-271	0.321362	0.148	0.041	3.84668e-267	NK_c01-GZMK	RELL1
7.24496e-271	0.379653	0.297	0.135	9.99081e-267	NK_c01-GZMK	MORF4L2
2.5012e-270	0.347174	0.232	0.091	3.44915e-266	NK_c01-GZMK	PDXK
2.60325e-270	0.384523	0.425	0.235	3.58988e-266	NK_c01-GZMK	YWHAE
7.49503e-270	0.415041	0.44	0.249	1.03356e-265	NK_c01-GZMK	HNRNPAB
3.54313e-268	0.363543	0.182	0.061	4.88598e-264	NK_c01-GZMK	METTL21A
2.39351e-267	0.399498	0.256	0.107	3.30066e-263	NK_c01-GZMK	BORCS5
4.65197e-267	0.387406	0.334	0.161	6.41507e-263	NK_c01-GZMK	PNPLA8
4.76149e-265	0.35769	0.286	0.127	6.56609e-261	NK_c01-GZMK	ERGIC1
1.4681e-264	0.340946	0.177	0.059	2.02451e-260	NK_c01-GZMK	CTPS1
6.21677e-264	0.372532	0.526	0.318	8.57292e-260	NK_c01-GZMK	BTG2
2.30348e-262	0.463998	0.526	0.337	3.1765e-258	NK_c01-GZMK	RNF125
3.25532e-262	0.340804	0.197	0.071	4.48909e-258	NK_c01-GZMK	SLFN13
4.77058e-259	0.392019	0.349	0.174	6.57863e-255	NK_c01-GZMK	RGS2
1.92101e-257	0.411929	0.327	0.162	2.64907e-253	NK_c01-GZMK	CTNNB1
1.4666e-256	0.377058	0.454	0.257	2.02244e-252	NK_c01-GZMK	SAMSN1
2.78112e-256	0.365903	0.118	0.028	3.83516e-252	NK_c01-GZMK	TNFRSF9
1.843e-255	0.30734	0.132	0.035	2.5415e-251	NK_c01-GZMK	GRASP
6.73359e-255	0.354676	0.262	0.114	9.28562e-251	NK_c01-GZMK	IRF2BP2
1.60146e-254	0.425655	0.241	0.101	2.20841e-250	NK_c01-GZMK	BLVRB
8.49314e-253	0.506463	0.401	0.231	1.1712e-248	NK_c01-GZMK	IL27RA
1.46516e-252	0.467023	0.393	0.222	2.02046e-248	NK_c01-GZMK	GLUD1
8.48846e-252	0.312633	0.16	0.05	1.17056e-247	NK_c01-GZMK	ABHD15
4.65368e-251	0.386119	0.639	0.465	6.41743e-247	NK_c01-GZMK	EIF5
1.92063e-249	0.311571	0.205	0.077	2.64855e-245	NK_c01-GZMK	LRRC41
3.43391e-249	0.421481	0.572	0.387	4.73537e-245	NK_c01-GZMK	NR3C1
1.68426e-248	0.406961	0.352	0.183	2.32259e-244	NK_c01-GZMK	SACM1L
6.08888e-248	0.40458	0.282	0.131	8.39657e-244	NK_c01-GZMK	LRMP
3.01547e-245	0.303647	0.167	0.055	4.15834e-241	NK_c01-GZMK	PRKCA
5.27665e-245	0.290838	0.139	0.04	7.2765e-241	NK_c01-GZMK	SLC35E1
1.11533e-243	0.372527	0.697	0.539	1.53805e-239	NK_c01-GZMK	PGK1
1.11089e-242	0.284599	0.881	0.744	1.53191e-238	NK_c01-GZMK	KLRB1
8.98586e-242	0.373193	0.365	0.194	1.23915e-237	NK_c01-GZMK	AMD1
6.98913e-241	0.403053	0.522	0.341	9.63801e-237	NK_c01-GZMK	VAPA
2.90732e-236	0.317249	0.194	0.073	4.0092e-232	NK_c01-GZMK	HMGCS1
5.61214e-234	0.363804	0.295	0.142	7.73915e-230	NK_c01-GZMK	RNF138
2.99691e-232	0.273012	0.109	0.026	4.13273e-228	NK_c01-GZMK	ABCG1
6.61793e-232	0.401993	0.371	0.204	9.12612e-228	NK_c01-GZMK	POLR2A
2.69763e-229	0.312144	0.226	0.094	3.72003e-225	NK_c01-GZMK	PRMT9
4.59787e-229	0.337838	0.249	0.111	6.34046e-225	NK_c01-GZMK	SURF2
1.08086e-228	0.40777	0.434	0.262	1.4905e-224	NK_c01-GZMK	UPP1
1.0881e-224	0.344872	0.423	0.243	1.50049e-220	NK_c01-GZMK	GTF2B
4.61899e-224	0.399101	0.368	0.205	6.36959e-220	NK_c01-GZMK	AHSA1
8.39304e-222	0.31331	0.212	0.087	1.1574e-217	NK_c01-GZMK	RGL4
1.71314e-221	0.375289	0.333	0.177	2.36243e-217	NK_c01-GZMK	STIP1
1.80789e-218	0.377101	0.14	0.044	2.49308e-214	NK_c01-GZMK	PHLDB2
2.27561e-218	0.344749	0.622	0.438	3.13807e-214	NK_c01-GZMK	IFITM3
3.53223e-217	0.295546	0.166	0.059	4.87094e-213	NK_c01-GZMK	PVRIG
2.77235e-216	0.368886	0.365	0.202	3.82307e-212	NK_c01-GZMK	PHF20L1
8.91442e-216	0.345268	0.324	0.17	1.2293e-211	NK_c01-GZMK	DDX27
1.5767e-215	0.376846	0.39	0.224	2.17427e-211	NK_c01-GZMK	SMARCA5
2.77185e-215	0.317657	0.203	0.082	3.82238e-211	NK_c01-GZMK	GABPB1
1.21543e-214	0.35569	0.183	0.07	1.67607e-210	NK_c01-GZMK	LAX1
1.83623e-214	0.320114	0.234	0.104	2.53217e-210	NK_c01-GZMK	CDC34
2.62272e-214	0.370925	0.46	0.286	3.61673e-210	NK_c01-GZMK	ARID5A
2.65297e-214	0.349024	0.684	0.536	3.65845e-210	NK_c01-GZMK	HNRNPC
3.2018e-214	0.372987	0.338	0.183	4.41529e-210	NK_c01-GZMK	PIK3AP1
1.25895e-213	0.337756	0.54	0.352	1.73609e-209	NK_c01-GZMK	SLA2
1.34009e-212	0.329572	0.2	0.081	1.84799e-208	NK_c01-GZMK	NEK1
1.57395e-212	0.328531	0.718	0.567	2.17047e-208	NK_c01-GZMK	WIPF1
1.68867e-212	0.399964	0.442	0.274	2.32868e-208	NK_c01-GZMK	LAPTM4A
4.47589e-212	0.371411	0.33	0.177	6.17225e-208	NK_c01-GZMK	CTR9
1.05426e-210	0.323215	0.29	0.143	1.45382e-206	NK_c01-GZMK	SKAP2
1.25533e-209	0.368927	0.439	0.269	1.7311e-205	NK_c01-GZMK	ADSS
1.58997e-209	0.411644	0.571	0.401	2.19257e-205	NK_c01-GZMK	SLC2A3
2.30861e-208	0.35439	0.34	0.184	3.18357e-204	NK_c01-GZMK	AKIRIN1
1.15603e-207	0.287875	0.164	0.06	1.59417e-203	NK_c01-GZMK	TRMO
1.56044e-202	0.34792	0.363	0.205	2.15184e-198	NK_c01-GZMK	TRA2A
4.35839e-201	0.333946	0.319	0.169	6.01022e-197	NK_c01-GZMK	TOX
5.90303e-201	0.359567	0.66	0.503	8.14027e-197	NK_c01-GZMK	HNRNPU
7.59896e-201	0.356128	0.353	0.197	1.0479e-196	NK_c01-GZMK	OFD1
8.64262e-201	0.357745	0.627	0.469	1.19182e-196	NK_c01-GZMK	AKAP13
4.92393e-198	0.297951	0.227	0.102	6.79011e-194	NK_c01-GZMK	PDLIM1
2.83255e-197	0.321067	0.26	0.126	3.90608e-193	NK_c01-GZMK	LPIN1
9.3774e-196	0.32302	0.356	0.2	1.29314e-191	NK_c01-GZMK	SAR1A
2.8574e-195	0.274767	0.151	0.053	3.94036e-191	NK_c01-GZMK	ZNF10
4.90488e-195	0.327764	0.455	0.284	6.76383e-191	NK_c01-GZMK	MAPK1IP1L
1.00051e-194	0.279995	0.15	0.054	1.3797e-190	NK_c01-GZMK	TRAF4
1.83634e-194	0.376514	0.275	0.14	2.53231e-190	NK_c01-GZMK	PBXIP1
1.13656e-193	0.256521	0.163	0.061	1.56732e-189	NK_c01-GZMK	POLR3E
1.86686e-192	0.337417	0.4	0.237	2.5744e-188	NK_c01-GZMK	TOP1
1.12993e-191	0.305592	0.208	0.092	1.55817e-187	NK_c01-GZMK	TSPYL1
1.1665e-190	0.31621	0.534	0.358	1.6086e-186	NK_c01-GZMK	MAGOH
3.89843e-190	0.331358	0.229	0.106	5.37593e-186	NK_c01-GZMK	MSL2
2.36795e-189	0.261425	0.11	0.032	3.26541e-185	NK_c01-GZMK	PELI1
2.43688e-189	0.324401	0.37	0.214	3.36045e-185	NK_c01-GZMK	CEBPZ
3.16732e-189	0.498384	0.131	0.045	4.36773e-185	NK_c01-GZMK	MIR155HG
7.51801e-188	0.264926	0.169	0.066	1.03673e-183	NK_c01-GZMK	P2RY10
2.16423e-187	0.263126	0.947	0.932	2.98448e-183	NK_c01-GZMK	ARHGDIB
5.88083e-187	0.429016	0.445	0.293	8.10967e-183	NK_c01-GZMK	CD44
4.5133e-186	0.338933	0.308	0.166	6.22384e-182	NK_c01-GZMK	GNA13
5.66215e-186	0.292715	0.206	0.091	7.80811e-182	NK_c01-GZMK	BANP
1.18214e-185	0.325884	0.437	0.27	1.63017e-181	NK_c01-GZMK	CNOT6L
1.35561e-185	0.433444	0.538	0.385	1.86938e-181	NK_c01-GZMK	ITGA4
1.51199e-184	0.34579	0.468	0.302	2.08503e-180	NK_c01-GZMK	HERPUD1
1.14139e-183	0.312093	0.192	0.082	1.57398e-179	NK_c01-GZMK	DHRS1
1.74305e-182	0.378132	0.485	0.327	2.40366e-178	NK_c01-GZMK	SLA
1.89196e-181	0.288876	0.198	0.087	2.60901e-177	NK_c01-GZMK	SRSF6
2.07228e-181	0.305212	0.245	0.119	2.85767e-177	NK_c01-GZMK	NDEL1
1.25613e-180	0.334911	0.434	0.276	1.7322e-176	NK_c01-GZMK	CCT2
1.50207e-178	0.286909	0.285	0.149	2.07136e-174	NK_c01-GZMK	SAR1B
2.32471e-178	0.331994	0.363	0.213	3.20578e-174	NK_c01-GZMK	CYLD
4.89871e-178	0.263092	0.158	0.061	6.75532e-174	NK_c01-GZMK	UBE2M
1.28485e-176	0.269519	0.154	0.06	1.7718e-172	NK_c01-GZMK	GOLIM4
5.03494e-176	0.308875	0.436	0.276	6.94318e-172	NK_c01-GZMK	PPP2CA
5.33821e-176	0.328311	0.303	0.165	7.36139e-172	NK_c01-GZMK	CCNT1
9.48003e-176	0.267477	0.183	0.078	1.3073e-171	NK_c01-GZMK	RAB21
1.63414e-175	0.294202	0.21	0.096	2.25348e-171	NK_c01-GZMK	ACSL3
1.48078e-174	0.332311	0.355	0.208	2.042e-170	NK_c01-GZMK	ZFAND5
3.0267e-173	0.261801	0.132	0.047	4.17382e-169	NK_c01-GZMK	ZNF184
7.74524e-173	0.256448	0.167	0.068	1.06807e-168	NK_c01-GZMK	GCDH
2.31036e-172	0.254164	0.183	0.078	3.18599e-168	NK_c01-GZMK	TGIF2
9.31639e-172	0.463257	0.708	0.607	1.28473e-167	NK_c01-GZMK	HSP90B1
1.28231e-171	0.328862	0.221	0.105	1.76831e-167	NK_c01-GZMK	PHLDA1
1.43806e-171	0.273668	0.162	0.066	1.98309e-167	NK_c01-GZMK	JMY
1.03295e-169	0.288873	0.247	0.124	1.42444e-165	NK_c01-GZMK	DEGS1
3.79457e-169	0.331229	0.607	0.444	5.23271e-165	NK_c01-GZMK	AOAH
2.77994e-168	0.327435	0.251	0.127	3.83354e-164	NK_c01-GZMK	KIR2DL4
2.22889e-167	0.290147	0.231	0.113	3.07363e-163	NK_c01-GZMK	SYK
2.58795e-167	0.348049	0.517	0.356	3.56878e-163	NK_c01-GZMK	PITPNC1
3.32396e-167	0.301514	0.239	0.12	4.58374e-163	NK_c01-GZMK	WDR74
5.01157e-167	0.291957	0.311	0.173	6.91095e-163	NK_c01-GZMK	CKS2
5.26952e-167	0.345013	0.396	0.248	7.26666e-163	NK_c01-GZMK	NSMCE3
1.10851e-164	0.272127	0.148	0.058	1.52863e-160	NK_c01-GZMK	ETV3
1.14557e-164	0.305262	0.262	0.137	1.57974e-160	NK_c01-GZMK	N4BP2L1
2.04142e-164	0.255305	0.174	0.074	2.81511e-160	NK_c01-GZMK	CDK16
9.25643e-164	0.284339	0.18	0.079	1.27646e-159	NK_c01-GZMK	ENOSF1
1.39672e-163	0.269786	0.206	0.096	1.92607e-159	NK_c01-GZMK	RABGGTA
2.85295e-162	0.292028	0.226	0.111	3.93422e-158	NK_c01-GZMK	CRY1
3.79772e-162	0.469875	0.303	0.176	5.23705e-158	NK_c01-GZMK	HSPA1A
5.53943e-162	0.301631	0.415	0.26	7.63888e-158	NK_c01-GZMK	CLK1
3.58675e-161	0.268278	0.272	0.143	4.94613e-157	NK_c01-GZMK	GSN
3.97752e-159	0.301373	0.206	0.099	5.485e-155	NK_c01-GZMK	KDM2B
5.0831e-159	0.275325	0.192	0.088	7.00959e-155	NK_c01-GZMK	GTPBP8
6.59951e-159	0.257509	0.154	0.063	9.10073e-155	NK_c01-GZMK	TEX30
9.58696e-159	0.298127	0.436	0.283	1.32204e-154	NK_c01-GZMK	RSL1D1
1.39164e-158	0.275844	0.233	0.117	1.91907e-154	NK_c01-GZMK	PDHA1
5.07935e-158	0.300226	0.574	0.417	7.00443e-154	NK_c01-GZMK	GPX4
1.1692e-157	0.282514	0.228	0.114	1.61232e-153	NK_c01-GZMK	ASL
2.54133e-156	0.306809	0.364	0.222	3.50449e-152	NK_c01-GZMK	NUCB2
6.4783e-156	0.252313	0.159	0.067	8.93357e-152	NK_c01-GZMK	SFMBT2
4.13636e-155	0.275884	0.18	0.081	5.70405e-151	NK_c01-GZMK	FOXO3
2.0517e-154	0.401396	0.408	0.271	2.8293e-150	NK_c01-GZMK	BAZ1A
4.64361e-154	0.253133	0.148	0.06	6.40354e-150	NK_c01-GZMK	TOGARAM2
5.70212e-154	0.290939	0.668	0.522	7.86323e-150	NK_c01-GZMK	ETS1
1.41362e-153	0.258473	0.186	0.085	1.94939e-149	NK_c01-GZMK	AGO2
3.29201e-153	0.293874	0.677	0.537	4.53969e-149	NK_c01-GZMK	SERBP1
1.27698e-152	0.274608	0.28	0.153	1.76096e-148	NK_c01-GZMK	DNAJB9
1.32024e-152	0.272198	0.693	0.558	1.82061e-148	NK_c01-GZMK	CD63
3.45666e-152	0.277809	0.478	0.321	4.76673e-148	NK_c01-GZMK	ILF2
4.38916e-152	0.337892	0.47	0.322	6.05265e-148	NK_c01-GZMK	RORA
6.00833e-152	0.362921	0.256	0.139	8.28549e-148	NK_c01-GZMK	PPA1
1.26157e-151	0.271479	0.199	0.095	1.7397e-147	NK_c01-GZMK	KCTD10
3.40932e-151	0.291389	0.799	0.7	4.70145e-147	NK_c01-GZMK	CALR
5.44107e-151	0.281832	0.212	0.105	7.50324e-147	NK_c01-GZMK	NEPRO
7.60749e-150	0.313132	0.275	0.153	1.04907e-145	NK_c01-GZMK	CHORDC1
4.03876e-149	0.292372	0.451	0.301	5.56945e-145	NK_c01-GZMK	EIF1AX
7.52803e-149	0.257029	0.186	0.086	1.03811e-144	NK_c01-GZMK	HGSNAT
1.67473e-148	0.277903	0.313	0.181	2.30945e-144	NK_c01-GZMK	STAU1
1.75238e-148	0.273246	0.187	0.088	2.41653e-144	NK_c01-GZMK	POLB
4.6372e-148	0.253299	0.172	0.077	6.3947e-144	NK_c01-GZMK	PER1
8.82043e-148	0.271456	0.673	0.532	1.21634e-143	NK_c01-GZMK	SERP1
1.00042e-147	0.327154	0.472	0.33	1.37958e-143	NK_c01-GZMK	POLR2K
1.73174e-145	0.274789	0.345	0.207	2.38807e-141	NK_c01-GZMK	UBE2J1
2.60732e-145	0.273053	0.3	0.172	3.59549e-141	NK_c01-GZMK	SRP54
7.92272e-145	0.28073	0.314	0.184	1.09254e-140	NK_c01-GZMK	SLC25A39
9.77768e-145	0.282292	0.24	0.128	1.34834e-140	NK_c01-GZMK	IL21R
1.31058e-144	0.279279	0.248	0.133	1.80729e-140	NK_c01-GZMK	INTS6
6.37174e-144	0.292562	0.344	0.208	8.78662e-140	NK_c01-GZMK	ZBTB1
2.13924e-143	0.255277	0.674	0.532	2.95001e-139	NK_c01-GZMK	RBM8A
7.27157e-143	0.289265	0.367	0.229	1.00275e-138	NK_c01-GZMK	CHD2
1.66341e-142	0.383919	0.354	0.229	2.29384e-138	NK_c01-GZMK	RAB9A
2.3039e-142	0.284577	0.158	0.069	3.17708e-138	NK_c01-GZMK	GSTM2
3.48203e-140	0.277788	0.264	0.147	4.80171e-136	NK_c01-GZMK	TANK
1.03869e-139	0.285802	0.294	0.17	1.43235e-135	NK_c01-GZMK	THUMPD3-AS1
1.53353e-137	0.278631	0.413	0.269	2.11474e-133	NK_c01-GZMK	G3BP1
2.16523e-136	0.275671	0.204	0.104	2.98586e-132	NK_c01-GZMK	TTC39C
1.09775e-135	0.253905	0.688	0.563	1.5138e-131	NK_c01-GZMK	ATP5F1B
9.09241e-134	0.27083	0.477	0.33	1.25384e-129	NK_c01-GZMK	CCT4
2.66866e-133	0.32805	0.406	0.272	3.68008e-129	NK_c01-GZMK	CNOT2
3.98379e-133	0.500979	0.24	0.134	5.49364e-129	NK_c01-GZMK	IFNG
7.72813e-133	0.324997	0.334	0.205	1.06571e-128	NK_c01-GZMK	AC016831.7
3.05192e-132	0.27178	0.259	0.145	4.2086e-128	NK_c01-GZMK	ABHD2
5.69063e-132	0.254643	0.279	0.159	7.84737e-128	NK_c01-GZMK	PHF1
4.52785e-131	0.274387	0.767	0.695	6.2439e-127	NK_c01-GZMK	GNG2
2.06677e-130	0.261181	0.315	0.189	2.85007e-126	NK_c01-GZMK	ODC1
8.33378e-130	0.266429	0.261	0.149	1.14923e-125	NK_c01-GZMK	SMS
1.0999e-129	0.267101	0.39	0.253	1.51676e-125	NK_c01-GZMK	DHX36
1.25178e-128	0.266773	0.204	0.105	1.72621e-124	NK_c01-GZMK	GALNT11
4.16336e-128	0.329789	0.306	0.188	5.74127e-124	NK_c01-GZMK	HECTD1
6.49532e-128	0.267957	0.223	0.12	8.95705e-124	NK_c01-GZMK	GNGT2
1.18611e-126	0.258454	0.295	0.176	1.63564e-122	NK_c01-GZMK	RPP21
1.68629e-126	0.258737	0.172	0.084	2.3254e-122	NK_c01-GZMK	YTHDF3
5.81372e-126	0.255124	0.182	0.091	8.01713e-122	NK_c01-GZMK	TUBA1C
6.93515e-126	0.250969	0.267	0.153	9.56357e-122	NK_c01-GZMK	STX5
2.96945e-125	0.256525	0.216	0.115	4.09487e-121	NK_c01-GZMK	GOLGB1
3.71817e-125	0.261063	0.305	0.183	5.12735e-121	NK_c01-GZMK	RNMT
3.53123e-124	0.275036	0.301	0.181	4.86956e-120	NK_c01-GZMK	NAA50
3.85521e-124	0.27611	0.371	0.243	5.31634e-120	NK_c01-GZMK	HM13
5.21219e-124	0.267682	0.238	0.133	7.18761e-120	NK_c01-GZMK	IER5
2.09704e-123	0.254805	0.382	0.248	2.89182e-119	NK_c01-GZMK	UBE2A
1.00437e-122	0.333614	0.336	0.216	1.38502e-118	NK_c01-GZMK	TRGC1
1.1796e-122	0.27587	0.429	0.294	1.62666e-118	NK_c01-GZMK	CKLF
5.64161e-122	0.277899	0.279	0.166	7.77978e-118	NK_c01-GZMK	GCH1
9.85702e-122	0.276518	0.302	0.184	1.35928e-117	NK_c01-GZMK	GPRIN3
1.6315e-121	0.266476	0.534	0.394	2.24984e-117	NK_c01-GZMK	EWSR1
3.67441e-121	0.25729	0.254	0.145	5.06701e-117	NK_c01-GZMK	PRKAR2A
4.09866e-121	0.256689	0.619	0.492	5.65205e-117	NK_c01-GZMK	HNRNPA0
4.74585e-121	0.264482	0.678	0.56	6.54452e-117	NK_c01-GZMK	ISG20
6.82975e-121	0.276273	0.312	0.192	9.41823e-117	NK_c01-GZMK	PDCL3
1.48812e-120	0.268749	0.32	0.198	2.05212e-116	NK_c01-GZMK	CCSER2
1.50419e-120	0.273682	0.613	0.486	2.07428e-116	NK_c01-GZMK	CDC37
5.73467e-120	0.254069	0.297	0.178	7.90811e-116	NK_c01-GZMK	HBP1
1.53664e-119	0.25927	0.253	0.144	2.11903e-115	NK_c01-GZMK	NEDD9
8.05949e-119	0.260304	0.23	0.129	1.1114e-114	NK_c01-GZMK	EIF3B
1.188e-117	0.26402	0.261	0.152	1.63825e-113	NK_c01-GZMK	JMJD1C
9.54558e-117	0.355674	0.382	0.265	1.31634e-112	NK_c01-GZMK	CACYBP
7.97059e-116	0.276679	0.648	0.537	1.09914e-111	NK_c01-GZMK	SRSF5
2.20458e-115	0.259663	0.781	0.686	3.04011e-111	NK_c01-GZMK	IRF1
3.88742e-115	0.254017	0.24	0.137	5.36075e-111	NK_c01-GZMK	MKNK2
3.7064e-112	0.260212	0.494	0.36	5.11112e-108	NK_c01-GZMK	RBMX
5.24427e-112	0.260603	0.252	0.149	7.23184e-108	NK_c01-GZMK	SLC10A3
2.21174e-111	0.2621	0.283	0.173	3.04998e-107	NK_c01-GZMK	ATF4
5.40163e-111	0.251191	0.432	0.301	7.44885e-107	NK_c01-GZMK	CCT6A
3.08138e-109	0.312076	0.405	0.285	4.24922e-105	NK_c01-GZMK	PPP1R2
1.20213e-108	0.263986	0.446	0.32	1.65774e-104	NK_c01-GZMK	CMTM6
8.18991e-107	0.266941	0.482	0.354	1.12939e-102	NK_c01-GZMK	PRKAR1A
1.06549e-105	0.296693	0.41	0.289	1.46932e-101	NK_c01-GZMK	IVNS1ABP
2.40781e-105	0.254526	0.332	0.216	3.32037e-101	NK_c01-GZMK	NASP
6.05607e-105	0.260568	0.39	0.269	8.35133e-101	NK_c01-GZMK	SERINC3
1.04846e-104	0.263605	0.328	0.215	1.44582e-100	NK_c01-GZMK	NARF
1.2823e-104	0.252796	0.319	0.205	1.76829e-100	NK_c01-GZMK	HELZ
1.30299e-103	0.255399	0.336	0.221	1.79683e-99	NK_c01-GZMK	USP11
2.8915e-103	0.25102	0.355	0.235	3.98738e-99	NK_c01-GZMK	PSTPIP1
4.55084e-103	0.255551	0.301	0.192	6.27561e-99	NK_c01-GZMK	HNRNPH1
2.36282e-97	0.254235	0.374	0.258	3.25834e-93	NK_c01-GZMK	RNF115
2.4113e-95	0.273889	0.597	0.494	3.32518e-91	NK_c01-GZMK	GPR65
6.83066e-95	0.251292	0.274	0.172	9.41948e-91	NK_c01-GZMK	YES1
1.18679e-94	0.252794	0.214	0.126	1.63659e-90	NK_c01-GZMK	PLP2
9.97162e-92	0.305866	0.372	0.265	1.37509e-87	NK_c01-GZMK	SPOCK2
3.23091e-87	0.27714	0.452	0.347	4.45543e-83	NK_c01-GZMK	RHOF
1.26439e-79	0.291	0.415	0.312	1.74359e-75	NK_c01-GZMK	ISG15
3.95913e-79	0.277262	0.721	0.636	5.45964e-75	NK_c01-GZMK	CLIC3
6.5377e-73	0.262132	0.531	0.431	9.01548e-69	NK_c01-GZMK	APOBEC3G
2.16547e-37	0.276297	0.48	0.613	2.98618e-33	NK_c01-GZMK	VIM
4.48675e-24	0.26285	0.796	0.818	6.18723e-20	NK_c01-GZMK	CCL4
4.80789e-23	0.255364	0.486	0.437	6.63008e-19	NK_c01-GZMK	SAT1
0	1.12978	0.718	0.298	0	NK_c02-KLRC2	CD3E
0	0.991051	0.945	0.506	0	NK_c02-KLRC2	GZMH
0	0.98024	0.683	0.273	0	NK_c02-KLRC2	HLA-DRB1
0	0.944938	0.914	0.479	0	NK_c02-KLRC2	IL32
0	0.915409	0.352	0.03	0	NK_c02-KLRC2	LAG3
0	0.903422	0.942	0.569	0	NK_c02-KLRC2	S100A6
0	0.853015	0.727	0.316	0	NK_c02-KLRC2	CD52
0	0.796321	0.951	0.679	0	NK_c02-KLRC2	S100A4
0	0.754201	0.365	0.124	0	NK_c02-KLRC2	KIR3DL2
0	0.748277	0.502	0.203	0	NK_c02-KLRC2	LINC01871
0	0.745527	0.589	0.222	0	NK_c02-KLRC2	KLRC3
0	0.739627	0.346	0.089	0	NK_c02-KLRC2	HLA-DQA1
0	0.706289	0.293	0.043	0	NK_c02-KLRC2	PTMS
0	0.694968	0.701	0.362	0	NK_c02-KLRC2	LGALS1
0	0.690683	0.329	0.124	0	NK_c02-KLRC2	HLA-DRA
0	0.686908	0.685	0.356	0	NK_c02-KLRC2	HLA-DPB1
0	0.684061	0.674	0.362	0	NK_c02-KLRC2	HLA-DPA1
0	0.616065	0.16	0.014	0	NK_c02-KLRC2	LINC02446
0	0.607761	0.327	0.099	0	NK_c02-KLRC2	HLA-DRB5
0	0.591981	0.714	0.434	0	NK_c02-KLRC2	MT2A
0	0.580383	0.83	0.533	0	NK_c02-KLRC2	TRBC1
0	0.56064	0.28	0.093	0	NK_c02-KLRC2	KLRC2
0	0.552761	0.995	0.787	0	NK_c02-KLRC2	CCL5
0	0.548148	0.914	0.49	0	NK_c02-KLRC2	FGFBP2
0	0.547935	0.985	0.849	0	NK_c02-KLRC2	SH3BGRL3
0	0.534482	0.557	0.306	0	NK_c02-KLRC2	DSTN
0	0.521844	0.534	0.275	0	NK_c02-KLRC2	CD2
0	0.499928	0.299	0.102	0	NK_c02-KLRC2	LIME1
0	0.494674	0.83	0.553	0	NK_c02-KLRC2	KLF2
0	0.48453	0.208	0.044	0	NK_c02-KLRC2	TRG-AS1
0	0.480801	0.666	0.393	0	NK_c02-KLRC2	C12orf75
0	0.480799	0.787	0.604	0	NK_c02-KLRC2	S100A10
0	0.47692	0.258	0.099	0	NK_c02-KLRC2	KIR2DL3
0	0.476633	0.8	0.618	0	NK_c02-KLRC2	RPS10
0	0.469381	0.887	0.537	0	NK_c02-KLRC2	FCGR3A
0	0.461911	0.977	0.589	0	NK_c02-KLRC2	GNLY
0	0.456149	0.864	0.645	0	NK_c02-KLRC2	CRIP1
0	0.454737	0.223	0.061	0	NK_c02-KLRC2	AC068775.1
0	0.443463	0.235	0.078	0	NK_c02-KLRC2	ANXA5
0	0.429089	0.204	0.059	0	NK_c02-KLRC2	LGALS3
0	0.416435	0.219	0.075	0	NK_c02-KLRC2	OASL
0	0.412152	0.117	0.016	0	NK_c02-KLRC2	MT1E
0	0.407382	0.205	0.065	0	NK_c02-KLRC2	TOB1
0	0.403279	0.616	0.423	0	NK_c02-KLRC2	C12orf57
0	0.402596	0.787	0.499	0	NK_c02-KLRC2	VIM
0	0.398705	0.984	0.705	0	NK_c02-KLRC2	GZMB
0	0.395436	0.819	0.645	0	NK_c02-KLRC2	RPL36A
0	0.393926	0.167	0.03	0	NK_c02-KLRC2	LILRB1
0	0.392055	0.233	0.088	0	NK_c02-KLRC2	CLEC2D
0	0.387569	0.148	0.037	0	NK_c02-KLRC2	KIR3DX1
0	0.380109	0.544	0.309	0	NK_c02-KLRC2	ADGRG1
0	0.374603	0.997	0.972	0	NK_c02-KLRC2	RPL39
0	0.366869	0.986	0.918	0	NK_c02-KLRC2	FTL
0	0.364797	0.975	0.92	0	NK_c02-KLRC2	RPS29
0	0.362471	0.815	0.575	0	NK_c02-KLRC2	EMP3
0	0.360141	0.999	0.984	0	NK_c02-KLRC2	RPS12
0	0.345687	0.901	0.757	0	NK_c02-KLRC2	CD99
0	0.342368	0.999	0.988	0	NK_c02-KLRC2	RPS27
0	0.340535	0.134	0.022	0	NK_c02-KLRC2	LINC00944
0	0.339288	0.932	0.827	0	NK_c02-KLRC2	RPL38
0	0.326235	0.998	0.974	0	NK_c02-KLRC2	RPL34
0	0.317218	0.999	0.984	0	NK_c02-KLRC2	RPS3
0	0.311917	0.994	0.956	0	NK_c02-KLRC2	RPL14
0	0.306582	0.991	0.943	0	NK_c02-KLRC2	RPS21
0	0.30615	0.987	0.94	0	NK_c02-KLRC2	RPL41
0	0.303141	0.994	0.967	0	NK_c02-KLRC2	CST7
0	0.288504	0.999	0.982	0	NK_c02-KLRC2	RPL30
0	0.286926	0.994	0.961	0	NK_c02-KLRC2	RPL35A
0	0.28596	0.997	0.975	0	NK_c02-KLRC2	RPS14
0	0.284944	1	1	0	NK_c02-KLRC2	B2M
0	0.279351	0.998	0.978	0	NK_c02-KLRC2	RPL11
0	0.266479	0.985	0.949	0	NK_c02-KLRC2	CYBA
0	0.262406	0.996	0.97	0	NK_c02-KLRC2	RPS28
0	0.260574	0.996	0.965	0	NK_c02-KLRC2	RPS4X
0	0.251313	0.988	0.947	0	NK_c02-KLRC2	RPL21
0	0.250477	0.988	0.953	0	NK_c02-KLRC2	RPS25
0	0.250292	0.993	0.957	0	NK_c02-KLRC2	RPL12
0	0.250113	0.966	0.875	0	NK_c02-KLRC2	PRF1
3.13791e-282	0.348627	0.621	0.436	4.32718e-278	NK_c02-KLRC2	LCK
7.81448e-282	0.364383	0.388	0.209	1.07762e-277	NK_c02-KLRC2	CAPN2
1.79965e-275	0.325115	0.788	0.609	2.48172e-271	NK_c02-KLRC2	ANXA1
1.53099e-271	0.384846	0.427	0.249	2.11124e-267	NK_c02-KLRC2	CEBPB
1.84801e-264	0.277713	0.114	0.026	2.5484e-260	NK_c02-KLRC2	NSG1
1.86151e-253	0.309265	0.747	0.594	2.56702e-249	NK_c02-KLRC2	PPDPF
2.59935e-253	0.385626	0.145	0.044	3.58451e-249	NK_c02-KLRC2	PRSS57
1.6952e-251	0.356796	0.485	0.31	2.33768e-247	NK_c02-KLRC2	PPP2R5C
1.80994e-247	0.372104	0.534	0.369	2.49591e-243	NK_c02-KLRC2	ITGB1
4.68648e-246	0.339033	0.61	0.438	6.46265e-242	NK_c02-KLRC2	CD48
8.34644e-245	0.323373	0.154	0.05	1.15097e-240	NK_c02-KLRC2	COL6A2
2.86446e-226	0.260955	0.117	0.032	3.95009e-222	NK_c02-KLRC2	TMEM273
5.96427e-218	0.276041	0.792	0.664	8.22473e-214	NK_c02-KLRC2	UQCRB
2.35251e-207	0.364695	0.295	0.16	3.24411e-203	NK_c02-KLRC2	GTF3C1
3.94396e-201	0.260457	0.728	0.582	5.43872e-197	NK_c02-KLRC2	TSC22D3
9.66411e-196	0.322463	0.335	0.194	1.33268e-191	NK_c02-KLRC2	LYAR
9.17896e-189	0.260774	0.514	0.34	1.26578e-184	NK_c02-KLRC2	AHNAK
1.92995e-183	0.306111	0.223	0.106	2.6614e-179	NK_c02-KLRC2	ASCL2
2.05792e-183	0.33338	0.214	0.101	2.83787e-179	NK_c02-KLRC2	ENC1
8.77157e-183	0.563206	0.141	0.053	1.2096e-178	NK_c02-KLRC2	S100B
4.44078e-171	0.286357	0.19	0.089	6.12384e-167	NK_c02-KLRC2	C4orf48
7.77738e-169	0.272877	0.286	0.16	1.0725e-164	NK_c02-KLRC2	F2R
9.14107e-162	0.253675	0.161	0.07	1.26055e-157	NK_c02-KLRC2	RGS10
9.33863e-159	0.280851	0.118	0.043	1.2878e-154	NK_c02-KLRC2	HPGD
2.44471e-157	0.267815	0.177	0.082	3.37125e-153	NK_c02-KLRC2	FGL2
2.93748e-157	0.284055	0.441	0.302	4.05078e-153	NK_c02-KLRC2	ANXA2
6.12562e-151	0.399803	0.107	0.038	8.44723e-147	NK_c02-KLRC2	CD3D
2.83842e-148	0.253246	0.661	0.541	3.91417e-144	NK_c02-KLRC2	PTP4A2
1.60593e-137	0.275861	0.233	0.131	2.21458e-133	NK_c02-KLRC2	CD320
5.49725e-135	0.262488	0.345	0.225	7.58071e-131	NK_c02-KLRC2	PRDX1
4.51508e-130	0.254234	0.631	0.516	6.22629e-126	NK_c02-KLRC2	S100A11
4.43273e-128	0.254202	0.217	0.119	6.11274e-124	NK_c02-KLRC2	SERPINB9
5.98813e-124	0.284174	0.238	0.139	8.25764e-120	NK_c02-KLRC2	MT1X
1.28188e-123	0.253739	0.298	0.187	1.76772e-119	NK_c02-KLRC2	PRDM1
3.83525e-44	0.437845	0.279	0.21	5.28881e-40	NK_c02-KLRC2	CCL4L2
0	1.31126	0.305	0.068	0	NK_c03-PTGDS	PTGDS
0	1.1006	0.384	0.073	0	NK_c03-PTGDS	MYOM2
0	1.04245	0.9	0.527	0	NK_c03-PTGDS	SPON2
0	1.00834	0.591	0.171	0	NK_c03-PTGDS	IGFBP7
0	0.949864	0.445	0.137	0	NK_c03-PTGDS	LAIR2
0	0.82863	0.436	0.113	0	NK_c03-PTGDS	AKR1C3
0	0.766112	0.618	0.268	0	NK_c03-PTGDS	CX3CR1
0	0.743486	0.901	0.468	0	NK_c03-PTGDS	FGFBP2
0	0.698907	0.417	0.151	0	NK_c03-PTGDS	C1orf162
0	0.626092	0.528	0.241	0	NK_c03-PTGDS	PRSS23
0	0.62026	0.768	0.508	0	NK_c03-PTGDS	TXNIP
0	0.60126	0.783	0.527	0	NK_c03-PTGDS	HOPX
0	0.580937	0.981	0.687	0	NK_c03-PTGDS	GZMB
0	0.55249	0.865	0.524	0	NK_c03-PTGDS	FCGR3A
0	0.526678	0.923	0.589	0	NK_c03-PTGDS	GNLY
0	0.520462	0.726	0.521	0	NK_c03-PTGDS	PLAC8
0	0.508855	0.974	0.866	0	NK_c03-PTGDS	PRF1
0	0.507627	0.767	0.586	0	NK_c03-PTGDS	AES
0	0.49851	0.314	0.132	0	NK_c03-PTGDS	CHST2
0	0.489014	1	0.993	0	NK_c03-PTGDS	NKG7
0	0.481606	0.673	0.443	0	NK_c03-PTGDS	ARL4C
0	0.479617	0.579	0.351	0	NK_c03-PTGDS	SELPLG
0	0.470955	0.698	0.531	0	NK_c03-PTGDS	CCND3
0	0.460093	0.814	0.559	0	NK_c03-PTGDS	EMP3
0	0.447419	0.51	0.32	0	NK_c03-PTGDS	TTC38
0	0.423259	0.373	0.2	0	NK_c03-PTGDS	PXN
0	0.422796	0.51	0.309	0	NK_c03-PTGDS	ADGRG1
0	0.421443	0.883	0.588	0	NK_c03-PTGDS	FCER1G
0	0.421369	0.534	0.357	0	NK_c03-PTGDS	TBX21
0	0.389	0.666	0.514	0	NK_c03-PTGDS	BIN2
0	0.378953	0.18	0.053	0	NK_c03-PTGDS	LINC00299
0	0.365356	0.847	0.746	0	NK_c03-PTGDS	EFHD2
0	0.358479	0.955	0.854	0	NK_c03-PTGDS	SH3BGRL3
0	0.355532	0.788	0.679	0	NK_c03-PTGDS	JAK1
0	0.334738	0.937	0.667	0	NK_c03-PTGDS	S100A4
0	0.332144	0.122	0.021	0	NK_c03-PTGDS	DAB2
0	0.329679	0.919	0.863	0	NK_c03-PTGDS	ITGB2
0	0.307901	0.893	0.839	0	NK_c03-PTGDS	PTPRCAP
0	0.295397	0.938	0.888	0	NK_c03-PTGDS	ARPC2
0	0.290858	0.994	0.981	0	NK_c03-PTGDS	TMSB10
0	0.287631	0.947	0.855	0	NK_c03-PTGDS	CTSW
0	0.264408	0.968	0.93	0	NK_c03-PTGDS	SERF2
0	0.257284	0.978	0.949	0	NK_c03-PTGDS	CYBA
0	0.256006	0.991	0.967	0	NK_c03-PTGDS	CST7
1.09467e-300	0.267603	0.907	0.869	1.50955e-296	NK_c03-PTGDS	RAC2
2.4456e-298	0.39717	0.624	0.459	3.37248e-294	NK_c03-PTGDS	PLEK
1.73637e-296	0.312233	0.81	0.724	2.39445e-292	NK_c03-PTGDS	RAP1B
4.00261e-293	0.359033	0.668	0.498	5.51959e-289	NK_c03-PTGDS	FLNA
1.07649e-292	0.414937	0.537	0.375	1.48447e-288	NK_c03-PTGDS	CARD16
2.47312e-288	0.293186	0.766	0.565	3.41043e-284	NK_c03-PTGDS	KLF2
1.31267e-287	0.400828	0.607	0.44	1.81017e-283	NK_c03-PTGDS	GIMAP7
2.66866e-274	0.271058	0.862	0.767	3.68008e-270	NK_c03-PTGDS	CD99
7.78932e-263	0.315863	0.783	0.684	1.07415e-258	NK_c03-PTGDS	LIMD2
2.86027e-261	0.320902	0.59	0.393	3.94431e-257	NK_c03-PTGDS	LGALS1
8.30149e-259	0.337503	0.746	0.614	1.14478e-254	NK_c03-PTGDS	CLIC3
1.23603e-256	0.362455	0.7	0.576	1.70449e-252	NK_c03-PTGDS	UCP2
1.67254e-251	0.383129	0.267	0.13	2.30643e-247	NK_c03-PTGDS	LAIR1
1.05533e-239	0.359004	0.156	0.053	1.4553e-235	NK_c03-PTGDS	RAMP1
1.95624e-237	0.329401	0.607	0.452	2.69766e-233	NK_c03-PTGDS	SH2D1B
6.95526e-227	0.348298	0.527	0.376	9.5913e-223	NK_c03-PTGDS	CAST
1.36641e-212	0.300051	0.164	0.063	1.88428e-208	NK_c03-PTGDS	CXCR2
9.70063e-212	0.355472	0.285	0.155	1.33772e-207	NK_c03-PTGDS	SH3BP5
1.42327e-211	0.279746	0.767	0.686	1.96269e-207	NK_c03-PTGDS	LAPTM5
1.61241e-208	0.310317	0.166	0.065	2.22352e-204	NK_c03-PTGDS	RASSF4
2.14846e-208	0.331251	0.725	0.63	2.96272e-204	NK_c03-PTGDS	LY6E
1.36759e-205	0.338553	0.63	0.517	1.88591e-201	NK_c03-PTGDS	ABHD17A
4.30077e-204	0.392842	0.214	0.102	5.93076e-200	NK_c03-PTGDS	TIMP1
5.45771e-204	0.350732	0.472	0.328	7.52618e-200	NK_c03-PTGDS	LINC00861
2.63022e-202	0.344418	0.343	0.205	3.62707e-198	NK_c03-PTGDS	RASA3
3.84581e-202	0.338169	0.217	0.103	5.30338e-198	NK_c03-PTGDS	MTSS1
7.32922e-200	0.354599	0.545	0.423	1.0107e-195	NK_c03-PTGDS	PPP1R18
1.97063e-199	0.450484	0.191	0.085	2.7175e-195	NK_c03-PTGDS	KIR2DL1
2.26409e-196	0.318212	0.418	0.275	3.12218e-192	NK_c03-PTGDS	SYNE1
6.9181e-192	0.34889	0.403	0.266	9.54006e-188	NK_c03-PTGDS	ITGB7
1.83004e-188	0.333923	0.598	0.489	2.52363e-184	NK_c03-PTGDS	PRMT2
5.03051e-182	0.3299	0.51	0.389	6.93707e-178	NK_c03-PTGDS	NDUFB7
2.51541e-181	0.265673	0.716	0.628	3.46875e-177	NK_c03-PTGDS	GABARAP
4.009e-181	0.314887	0.347	0.216	5.52841e-177	NK_c03-PTGDS	STK38
4.05698e-179	0.336103	0.502	0.368	5.59458e-175	NK_c03-PTGDS	GIMAP4
1.60253e-176	0.308757	0.552	0.436	2.20988e-172	NK_c03-PTGDS	SPN
1.8071e-170	0.331942	0.403	0.282	2.49199e-166	NK_c03-PTGDS	GLIPR2
1.41625e-165	0.285316	0.607	0.512	1.95301e-161	NK_c03-PTGDS	DHRS7
1.52776e-165	0.273419	0.446	0.31	2.10679e-161	NK_c03-PTGDS	SYNE2
7.09704e-165	0.314227	0.473	0.349	9.78682e-161	NK_c03-PTGDS	TRAF3IP3
1.47844e-164	0.258126	0.702	0.612	2.03877e-160	NK_c03-PTGDS	PPP1CA
9.30139e-163	0.333324	0.346	0.226	1.28266e-158	NK_c03-PTGDS	GLRX
1.62446e-161	0.311544	0.465	0.344	2.24013e-157	NK_c03-PTGDS	BTN3A2
1.37155e-160	0.265655	0.691	0.612	1.89137e-156	NK_c03-PTGDS	MSN
4.37481e-160	0.292001	0.625	0.533	6.03286e-156	NK_c03-PTGDS	GPSM3
6.54748e-158	0.34004	0.302	0.188	9.02898e-154	NK_c03-PTGDS	GK5
5.05726e-157	0.268654	0.561	0.426	6.97396e-153	NK_c03-PTGDS	C12orf75
1.99838e-156	0.333346	0.311	0.198	2.75576e-152	NK_c03-PTGDS	CXXC5
9.63841e-154	0.255334	0.637	0.521	1.32914e-149	NK_c03-PTGDS	S1PR5
5.76687e-152	0.289909	0.482	0.358	7.95251e-148	NK_c03-PTGDS	PYHIN1
5.51968e-151	0.401784	0.201	0.104	7.61163e-147	NK_c03-PTGDS	KIR3DL1
9.67614e-151	0.258979	0.382	0.256	1.33434e-146	NK_c03-PTGDS	RIPOR2
1.8311e-148	0.299836	0.403	0.285	2.52508e-144	NK_c03-PTGDS	PTPN4
3.91e-144	0.251419	0.172	0.083	5.39189e-140	NK_c03-PTGDS	RAP1GAP2
4.67549e-143	0.286833	0.478	0.365	6.4475e-139	NK_c03-PTGDS	TPST2
3.95771e-138	0.26363	0.142	0.065	5.45768e-134	NK_c03-PTGDS	LGALS9C
2.23879e-137	0.286035	0.395	0.281	3.08728e-133	NK_c03-PTGDS	C1orf21
3.08999e-136	0.301466	0.462	0.358	4.2611e-132	NK_c03-PTGDS	FGR
1.55589e-135	0.263562	0.148	0.07	2.14558e-131	NK_c03-PTGDS	TBXAS1
3.69092e-134	0.283967	0.413	0.302	5.08978e-130	NK_c03-PTGDS	MYO1F
7.65246e-133	0.303287	0.331	0.223	1.05527e-128	NK_c03-PTGDS	DIP2A
1.41101e-130	0.276931	0.343	0.233	1.94579e-126	NK_c03-PTGDS	IGF2R
6.61691e-129	0.280603	0.425	0.318	9.12472e-125	NK_c03-PTGDS	NFATC2
4.25022e-127	0.286386	0.347	0.242	5.86105e-123	NK_c03-PTGDS	TFDP2
1.30803e-121	0.266191	0.237	0.144	1.80377e-117	NK_c03-PTGDS	GSAP
6.36055e-121	0.279932	0.259	0.163	8.77119e-117	NK_c03-PTGDS	ITGAM
4.06479e-118	0.294238	0.318	0.218	5.60534e-114	NK_c03-PTGDS	GIMAP1
5.99621e-117	0.290307	0.339	0.239	8.26877e-113	NK_c03-PTGDS	CDKN2D
1.11694e-116	0.264791	0.57	0.487	1.54027e-112	NK_c03-PTGDS	RHOC
4.35403e-116	0.299932	0.303	0.205	6.00421e-112	NK_c03-PTGDS	HAVCR2
2.78559e-115	0.270822	0.274	0.178	3.84133e-111	NK_c03-PTGDS	RASGRP2
4.60586e-113	0.281882	0.364	0.267	6.35148e-109	NK_c03-PTGDS	SAMHD1
2.64511e-112	0.256542	0.298	0.2	3.6476e-108	NK_c03-PTGDS	CEP78
3.6963e-112	0.26993	0.259	0.167	5.0972e-108	NK_c03-PTGDS	PTPN12
3.03436e-109	0.257049	0.472	0.374	4.18438e-105	NK_c03-PTGDS	CD300A
3.30861e-108	0.275478	0.263	0.173	4.56258e-104	NK_c03-PTGDS	RGS19
1.21993e-107	0.265451	0.38	0.285	1.68228e-103	NK_c03-PTGDS	MIEN1
5.11799e-106	0.252214	0.195	0.112	7.05771e-102	NK_c03-PTGDS	ASCL2
1.84679e-105	0.255878	0.235	0.148	2.54673e-101	NK_c03-PTGDS	TSPAN14
5.10465e-105	0.273975	0.43	0.336	7.03931e-101	NK_c03-PTGDS	NCR3
1.56211e-101	0.269494	0.348	0.26	2.15414e-97	NK_c03-PTGDS	HMOX2
1.94345e-98	0.263286	0.298	0.21	2.68002e-94	NK_c03-PTGDS	PTPN18
1.57582e-97	0.252132	0.269	0.179	2.17306e-93	NK_c03-PTGDS	PTGER2
3.4077e-96	0.260681	0.367	0.274	4.69922e-92	NK_c03-PTGDS	PLEKHF1
5.50989e-86	0.256274	0.304	0.223	7.59814e-82	NK_c03-PTGDS	CISD3
0	2.49148	0.488	0.076	0	NK_c04-IFNG	HSPA1B
0	2.30052	0.523	0.191	0	NK_c04-IFNG	HSPA1A
0	2.23406	0.224	0.033	0	NK_c04-IFNG	HSPA6
0	2.11425	0.754	0.292	0	NK_c04-IFNG	FOS
0	1.86789	0.689	0.246	0	NK_c04-IFNG	CCL3
0	1.43757	0.279	0.025	0	NK_c04-IFNG	CCL3L1
0	1.17373	0.771	0.246	0	NK_c04-IFNG	GZMK
0	1.15233	0.798	0.321	0	NK_c04-IFNG	XCL1
0	1.10042	0.757	0.354	0	NK_c04-IFNG	XCL2
0	1.02971	0.717	0.324	0	NK_c04-IFNG	CD160
0	0.806041	0.254	0.018	0	NK_c04-IFNG	SPRY2
3.63327e-301	2.08283	0.666	0.359	5.01028e-297	NK_c04-IFNG	DNAJB1
5.51117e-236	0.763052	0.834	0.57	7.59991e-232	NK_c04-IFNG	CMC1
1.20435e-225	0.716569	0.909	0.795	1.6608e-221	NK_c04-IFNG	GSTP1
1.89227e-222	0.904599	0.666	0.39	2.60944e-218	NK_c04-IFNG	TRDC
1.63584e-216	1.19703	0.506	0.232	2.25583e-212	NK_c04-IFNG	PPP1R15A
1.6495e-207	0.663761	0.901	0.674	2.27466e-203	NK_c04-IFNG	FCER1G
9.04334e-200	1.16269	0.179	0.035	1.24708e-195	NK_c04-IFNG	EGR1
6.73217e-192	1.22677	0.391	0.148	9.28367e-188	NK_c04-IFNG	IFNG
2.09777e-185	1.01207	0.687	0.453	2.89282e-181	NK_c04-IFNG	GADD45B
1.93743e-176	0.39666	0.105	0.014	2.67172e-172	NK_c04-IFNG	EPS8
3.65201e-175	1.13351	0.395	0.158	5.03613e-171	NK_c04-IFNG	FOSB
7.78011e-169	0.48645	0.141	0.025	1.07288e-164	NK_c04-IFNG	BCO2
1.27523e-168	1.68537	0.454	0.219	1.75855e-164	NK_c04-IFNG	JUN
1.81638e-167	0.516882	0.92	0.771	2.50479e-163	NK_c04-IFNG	KLRB1
1.69975e-161	1.01203	0.411	0.179	2.34395e-157	NK_c04-IFNG	NFKBIZ
3.33371e-158	0.596711	0.815	0.637	4.59718e-154	NK_c04-IFNG	IL2RB
2.97126e-154	1.27771	0.692	0.534	4.09736e-150	NK_c04-IFNG	CD69
4.83578e-154	0.428709	0.968	0.901	6.66855e-150	NK_c04-IFNG	CD7
5.50945e-152	0.649844	0.703	0.51	7.59754e-148	NK_c04-IFNG	STK17A
3.13997e-150	1.24352	0.455	0.218	4.33002e-146	NK_c04-IFNG	CCL4L2
1.6409e-149	0.563118	0.185	0.046	2.2628e-145	NK_c04-IFNG	DNAJB4
1.42597e-143	0.573425	0.291	0.102	1.96641e-139	NK_c04-IFNG	TOX2
1.10998e-142	1.18393	0.669	0.51	1.53067e-138	NK_c04-IFNG	DUSP1
3.92302e-139	0.525791	0.224	0.068	5.40984e-135	NK_c04-IFNG	CAPN12
3.48083e-133	0.648118	0.523	0.293	4.80007e-129	NK_c04-IFNG	PTGDR
1.53077e-118	0.58835	0.262	0.098	2.11094e-114	NK_c04-IFNG	KMT2E-AS1
2.36168e-115	0.480538	0.315	0.126	3.25676e-111	NK_c04-IFNG	CXCR6
2.2977e-111	0.602972	0.658	0.454	3.16853e-107	NK_c04-IFNG	CEBPD
3.11456e-111	0.742344	0.286	0.119	4.29498e-107	NK_c04-IFNG	PRMT9
3.65705e-111	0.612613	0.435	0.237	5.04307e-107	NK_c04-IFNG	EOMES
1.26129e-108	0.575757	0.499	0.295	1.73932e-104	NK_c04-IFNG	SH2D1A
4.69513e-108	0.354652	0.994	0.988	6.47459e-104	NK_c04-IFNG	IFITM1
3.79001e-106	0.577002	0.27	0.11	5.22642e-102	NK_c04-IFNG	SESN1
3.04541e-103	0.48064	0.187	0.06	4.19962e-99	NK_c04-IFNG	SPRY1
7.35383e-100	1.00165	0.883	0.809	1.01409e-95	NK_c04-IFNG	CCL4
1.0791e-99	0.487678	0.238	0.092	1.48807e-95	NK_c04-IFNG	LY9
1.16083e-99	0.724503	0.299	0.132	1.60078e-95	NK_c04-IFNG	RBKS
1.04471e-98	0.390543	0.15	0.043	1.44066e-94	NK_c04-IFNG	DUSP6
1.88827e-98	0.8784	0.535	0.361	2.60393e-94	NK_c04-IFNG	BTG2
7.45098e-97	0.456507	0.224	0.084	1.02749e-92	NK_c04-IFNG	GRAMD1A
5.63467e-96	0.448766	0.225	0.084	7.77021e-92	NK_c04-IFNG	IPCEF1
3.30395e-93	0.565922	0.361	0.185	4.55615e-89	NK_c04-IFNG	TMIGD2
4.76314e-90	0.492384	0.142	0.041	6.56837e-86	NK_c04-IFNG	IER3
7.00246e-90	0.972432	0.663	0.588	9.6564e-86	NK_c04-IFNG	JUNB
1.52614e-85	0.612329	0.71	0.557	2.10454e-81	NK_c04-IFNG	HSPE1
2.32049e-85	0.305385	0.114	0.029	3.19996e-81	NK_c04-IFNG	AC087239.1
7.17358e-84	0.434306	0.196	0.073	9.89237e-80	NK_c04-IFNG	MIR181A1HG
2.31922e-79	0.394296	0.167	0.058	3.1982e-75	NK_c04-IFNG	NCF1
1.59051e-78	0.333746	0.117	0.033	2.19331e-74	NK_c04-IFNG	P2RY11
5.76842e-78	0.493823	0.57	0.413	7.95465e-74	NK_c04-IFNG	ARPC5L
3.03578e-77	0.40769	0.179	0.066	4.18635e-73	NK_c04-IFNG	HDAC9
1.55707e-76	0.361888	0.128	0.039	2.1472e-72	NK_c04-IFNG	CD27
2.7163e-75	0.312157	0.955	0.95	3.74578e-71	NK_c04-IFNG	TYROBP
3.83711e-74	0.286938	0.979	0.972	5.29138e-70	NK_c04-IFNG	IFITM2
6.68407e-72	0.495137	0.44	0.261	9.21734e-68	NK_c04-IFNG	KLRC1
2.46033e-70	0.527669	0.471	0.321	3.3928e-66	NK_c04-IFNG	CKLF
1.4142e-69	1.00775	0.598	0.495	1.95018e-65	NK_c04-IFNG	NFKBIA
2.50199e-69	0.373575	0.188	0.075	3.45024e-65	NK_c04-IFNG	LDB2
5.57626e-69	0.725907	0.318	0.17	7.68967e-65	NK_c04-IFNG	NR4A1
5.36469e-68	0.449361	0.917	0.897	7.3979e-64	NK_c04-IFNG	UBB
5.48982e-68	0.516543	0.132	0.044	7.57046e-64	NK_c04-IFNG	ATF3
8.49941e-68	0.445492	0.166	0.062	1.17207e-63	NK_c04-IFNG	AC020916.1
2.1238e-67	0.339343	0.123	0.039	2.92873e-63	NK_c04-IFNG	IL18
2.65581e-65	0.701143	0.717	0.693	3.66236e-61	NK_c04-IFNG	IER2
6.09554e-65	0.486771	0.182	0.074	8.40575e-61	NK_c04-IFNG	ARL5B
3.93339e-64	0.578072	0.404	0.258	5.42414e-60	NK_c04-IFNG	SNHG8
1.61234e-63	0.359495	0.96	0.975	2.22342e-59	NK_c04-IFNG	H3F3B
3.52215e-63	0.448948	0.384	0.222	4.85705e-59	NK_c04-IFNG	COTL1
1.18437e-62	0.598895	0.876	0.832	1.63325e-58	NK_c04-IFNG	HSP90AA1
9.58787e-61	0.413681	0.25	0.125	1.32217e-56	NK_c04-IFNG	FHL3
1.74087e-59	0.56298	0.618	0.506	2.40067e-55	NK_c04-IFNG	ZFP36L1
1.35114e-57	0.498083	0.291	0.162	1.86322e-53	NK_c04-IFNG	MYLIP
1.58944e-57	0.478584	0.176	0.075	2.19184e-53	NK_c04-IFNG	RHOB
1.81731e-57	0.365954	0.118	0.04	2.50607e-53	NK_c04-IFNG	TNFSF9
1.40814e-56	0.71407	0.369	0.239	1.94183e-52	NK_c04-IFNG	CITED2
6.64893e-56	0.447076	0.244	0.126	9.16887e-52	NK_c04-IFNG	PECAM1
2.66409e-55	0.392409	0.743	0.68	3.67378e-51	NK_c04-IFNG	EIF3G
1.69957e-54	0.461487	0.372	0.24	2.34371e-50	NK_c04-IFNG	SYNRG
1.26433e-52	0.383435	0.128	0.048	1.74351e-48	NK_c04-IFNG	COQ7
2.85427e-52	0.363817	0.163	0.069	3.93604e-48	NK_c04-IFNG	COLQ
1.32747e-51	0.262994	0.118	0.042	1.83058e-47	NK_c04-IFNG	ZBTB10
1.32498e-50	0.377477	0.479	0.335	1.82715e-46	NK_c04-IFNG	CLDND1
7.99323e-49	0.327921	0.101	0.034	1.10227e-44	NK_c04-IFNG	GADD45G
8.8087e-48	0.663334	0.384	0.261	1.21472e-43	NK_c04-IFNG	SOCS1
1.35794e-47	0.388016	0.386	0.259	1.8726e-43	NK_c04-IFNG	PSTPIP1
1.95356e-46	0.435956	0.374	0.25	2.69396e-42	NK_c04-IFNG	IKZF3
1.32684e-45	0.270636	0.781	0.669	1.82971e-41	NK_c04-IFNG	ALOX5AP
1.61808e-45	0.597719	0.297	0.178	2.23133e-41	NK_c04-IFNG	RGS1
1.70057e-45	0.402407	0.466	0.345	2.34508e-41	NK_c04-IFNG	LCP2
1.48714e-43	0.754175	0.549	0.47	2.05077e-39	NK_c04-IFNG	KLF6
8.96942e-43	0.284893	0.133	0.056	1.23688e-38	NK_c04-IFNG	DZIP3
9.3605e-43	0.537895	0.212	0.114	1.29081e-38	NK_c04-IFNG	NEU1
9.76414e-43	0.420399	0.547	0.459	1.34647e-38	NK_c04-IFNG	RSRP1
1.22767e-42	0.33085	0.166	0.078	1.69295e-38	NK_c04-IFNG	ATP8B4
1.42648e-42	0.416132	0.407	0.287	1.96711e-38	NK_c04-IFNG	AGTRAP
6.4632e-42	0.315723	0.128	0.053	8.91276e-38	NK_c04-IFNG	AC243829.1
6.76889e-42	0.360061	0.608	0.51	9.3343e-38	NK_c04-IFNG	RHOC
2.18283e-41	0.596924	0.309	0.202	3.01012e-37	NK_c04-IFNG	HSPB1
2.30039e-41	0.355912	0.184	0.092	3.17223e-37	NK_c04-IFNG	AC007384.1
1.31827e-40	0.379118	0.378	0.263	1.81789e-36	NK_c04-IFNG	CMTM3
2.23503e-39	0.309601	0.176	0.088	3.0821e-35	NK_c04-IFNG	HDAC7
1.10728e-38	0.383539	0.474	0.369	1.52694e-34	NK_c04-IFNG	ACAP1
3.60409e-38	0.308868	0.159	0.077	4.97004e-34	NK_c04-IFNG	S100PBP
1.39173e-37	0.268853	0.127	0.055	1.9192e-33	NK_c04-IFNG	ADAMTS17
1.50843e-37	0.34727	0.151	0.072	2.08012e-33	NK_c04-IFNG	AC093010.2
5.55924e-37	0.366979	0.467	0.362	7.66619e-33	NK_c04-IFNG	DENND2D
2.00087e-36	0.385973	0.187	0.1	2.7592e-32	NK_c04-IFNG	KLF10
6.04064e-36	0.387907	0.46	0.361	8.33004e-32	NK_c04-IFNG	CNN2
7.10672e-36	0.356641	0.646	0.588	9.80016e-32	NK_c04-IFNG	CD63
9.81247e-36	0.487065	0.625	0.49	1.35314e-31	NK_c04-IFNG	NR4A2
1.1683e-35	0.316156	0.134	0.062	1.61108e-31	NK_c04-IFNG	ATP2B1-AS1
9.28788e-35	0.422017	0.31	0.203	1.2808e-30	NK_c04-IFNG	TIPARP
1.54065e-34	0.37414	0.255	0.157	2.12456e-30	NK_c04-IFNG	SNHG9
2.76284e-34	0.40281	0.222	0.128	3.80996e-30	NK_c04-IFNG	PMAIP1
3.29708e-34	0.300937	0.573	0.48	4.54667e-30	NK_c04-IFNG	AOAH
4.39549e-34	0.448618	0.518	0.431	6.06138e-30	NK_c04-IFNG	TAGAP
5.61871e-34	0.351654	0.665	0.602	7.74821e-30	NK_c04-IFNG	TRBC2
8.86482e-34	0.47304	0.266	0.164	1.22246e-29	NK_c04-IFNG	ICAM1
1.38863e-33	0.382049	0.416	0.32	1.91492e-29	NK_c04-IFNG	CCNL1
3.35402e-33	0.5072	0.37	0.268	4.6252e-29	NK_c04-IFNG	SERTAD1
4.07875e-33	0.333449	0.577	0.479	5.6246e-29	NK_c04-IFNG	IFITM3
9.78289e-33	0.289364	0.64	0.574	1.34906e-28	NK_c04-IFNG	FYB1
1.24124e-32	0.349821	0.153	0.077	1.71167e-28	NK_c04-IFNG	RASGEF1B
2.40754e-32	0.27252	0.113	0.05	3.32e-28	NK_c04-IFNG	ZNF296
5.99608e-32	0.263507	0.111	0.049	8.26859e-28	NK_c04-IFNG	UNC93B1
3.98989e-31	0.25827	0.133	0.065	5.50205e-27	NK_c04-IFNG	WDSUB1
5.56214e-31	0.396659	0.45	0.363	7.67019e-27	NK_c04-IFNG	CCT4
1.15801e-30	0.687314	0.348	0.252	1.59689e-26	NK_c04-IFNG	HSPH1
1.67983e-30	0.300589	0.134	0.066	2.31649e-26	NK_c04-IFNG	LPAR6
1.78968e-30	0.333194	0.577	0.509	2.46797e-26	NK_c04-IFNG	BST2
3.08568e-30	0.359206	0.501	0.43	4.25516e-26	NK_c04-IFNG	EIF4A2
1.03195e-29	0.318015	0.201	0.118	1.42306e-25	NK_c04-IFNG	SNX10
1.95221e-29	0.454516	0.749	0.714	2.69209e-25	NK_c04-IFNG	HSP90AB1
2.09584e-29	0.335491	0.298	0.204	2.89017e-25	NK_c04-IFNG	YWHAH
4.68088e-29	0.369322	0.162	0.088	6.45494e-25	NK_c04-IFNG	GSTM2
2.10472e-28	0.293148	0.143	0.074	2.90241e-24	NK_c04-IFNG	ZNF10
3.74035e-28	0.26841	0.318	0.215	5.15795e-24	NK_c04-IFNG	TNFSF14
4.80052e-28	0.277215	0.148	0.078	6.61991e-24	NK_c04-IFNG	ILF3-DT
6.92885e-28	0.39945	0.216	0.133	9.55488e-24	NK_c04-IFNG	ANKRD37
1.19584e-27	0.301145	0.152	0.083	1.64906e-23	NK_c04-IFNG	PVRIG
1.54842e-27	0.30246	0.438	0.345	2.13527e-23	NK_c04-IFNG	LAT2
4.11456e-27	0.320087	0.266	0.177	5.67398e-23	NK_c04-IFNG	GPR174
5.04284e-26	0.26431	0.137	0.071	6.95408e-22	NK_c04-IFNG	AL118516.1
8.96969e-26	0.261232	0.302	0.203	1.23692e-21	NK_c04-IFNG	IRF8
1.01892e-25	0.31593	0.427	0.339	1.40509e-21	NK_c04-IFNG	TXK
1.61228e-25	0.339262	0.409	0.323	2.22333e-21	NK_c04-IFNG	RCSD1
1.67036e-25	0.32779	0.196	0.121	2.30343e-21	NK_c04-IFNG	PILRB
1.24066e-24	0.325718	0.286	0.203	1.71087e-20	NK_c04-IFNG	DGCR6L
2.06595e-24	0.316989	0.254	0.173	2.84895e-20	NK_c04-IFNG	CLPTM1
2.15993e-24	0.257657	0.671	0.628	2.97854e-20	NK_c04-IFNG	SON
5.03723e-24	0.309153	0.318	0.232	6.94634e-20	NK_c04-IFNG	OFD1
7.30233e-24	0.280366	0.146	0.081	1.00699e-19	NK_c04-IFNG	ARRDC3
8.33023e-24	0.646974	0.46	0.39	1.14874e-19	NK_c04-IFNG	TUBB4B
1.27615e-23	0.299151	0.286	0.201	1.75981e-19	NK_c04-IFNG	SH3BP1
1.35747e-23	0.290867	0.203	0.129	1.87195e-19	NK_c04-IFNG	PDLIM1
5.90363e-23	0.286145	0.168	0.101	8.14111e-19	NK_c04-IFNG	STN1
8.67495e-23	0.301384	0.364	0.282	1.19628e-18	NK_c04-IFNG	TCIRG1
1.9598e-22	0.312057	0.251	0.173	2.70257e-18	NK_c04-IFNG	TRGV9
5.168e-22	0.256266	0.128	0.07	7.12668e-18	NK_c04-IFNG	TRAC
6.35215e-22	0.708551	0.339	0.267	8.75962e-18	NK_c04-IFNG	UBE2S
1.54593e-21	0.314045	0.397	0.321	2.13183e-17	NK_c04-IFNG	IL16
3.72454e-21	0.305717	0.26	0.183	5.13614e-17	NK_c04-IFNG	AC243960.1
7.5797e-21	0.333972	0.229	0.156	1.04524e-16	NK_c04-IFNG	IER5
1.06347e-20	0.39167	0.281	0.205	1.46653e-16	NK_c04-IFNG	H2AFX
1.07405e-20	0.253664	0.11	0.058	1.48111e-16	NK_c04-IFNG	AC025164.1
5.44173e-20	0.274024	0.179	0.114	7.50414e-16	NK_c04-IFNG	TRAPPC2B
9.59589e-20	0.263641	0.417	0.342	1.32327e-15	NK_c04-IFNG	CD96
1.0022e-19	0.414468	0.192	0.126	1.38203e-15	NK_c04-IFNG	ZFAND2A
4.51693e-19	0.261399	0.12	0.067	6.22885e-15	NK_c04-IFNG	NSUN6
7.58477e-19	0.298754	0.407	0.347	1.04594e-14	NK_c04-IFNG	NDUFS8
8.77074e-19	0.265217	0.148	0.09	1.20948e-14	NK_c04-IFNG	GPR89B
9.18773e-19	0.266881	0.233	0.162	1.26699e-14	NK_c04-IFNG	LINC02256
1.52228e-18	0.308512	0.429	0.36	2.09923e-14	NK_c04-IFNG	CCNH
1.56341e-18	0.310691	0.173	0.11	2.15594e-14	NK_c04-IFNG	LTB
1.8714e-18	0.321379	0.275	0.204	2.58066e-14	NK_c04-IFNG	PPP1R10
3.0062e-18	0.284003	0.366	0.298	4.14555e-14	NK_c04-IFNG	GYG1
3.77878e-18	0.322887	0.239	0.168	5.21094e-14	NK_c04-IFNG	TSPYL2
4.12069e-18	0.310295	0.2	0.136	5.68243e-14	NK_c04-IFNG	PNP
1.27992e-17	0.275697	0.179	0.117	1.76502e-13	NK_c04-IFNG	ST8SIA4
1.76713e-17	0.255279	0.201	0.136	2.43687e-13	NK_c04-IFNG	ABCB1
1.85145e-17	0.33005	0.314	0.24	2.55315e-13	NK_c04-IFNG	CHMP1B
2.08801e-17	0.25137	0.142	0.086	2.87936e-13	NK_c04-IFNG	CHN2
2.49797e-17	0.291341	0.234	0.17	3.4447e-13	NK_c04-IFNG	OTUD6B-AS1
2.94571e-17	0.280763	0.354	0.28	4.06213e-13	NK_c04-IFNG	MYBL1
3.4286e-17	0.267878	0.264	0.194	4.72804e-13	NK_c04-IFNG	YES1
4.91588e-17	0.272194	0.17	0.111	6.77899e-13	NK_c04-IFNG	NUFIP2
9.73546e-17	0.278582	0.399	0.338	1.34252e-12	NK_c04-IFNG	FKBP11
1.40105e-16	0.255892	0.217	0.153	1.93204e-12	NK_c04-IFNG	DHRS3
3.75466e-16	0.266595	0.424	0.364	5.17768e-12	NK_c04-IFNG	RPL22L1
5.85396e-16	0.286707	0.122	0.073	8.07261e-12	NK_c04-IFNG	HIST2H2AA4
7.1412e-16	0.268093	0.444	0.39	9.84772e-12	NK_c04-IFNG	ZFAS1
1.44521e-15	0.2638	0.464	0.418	1.99294e-11	NK_c04-IFNG	SELENOH
2.68451e-15	0.342692	0.283	0.222	3.70194e-11	NK_c04-IFNG	ERN1
3.72084e-15	0.258471	0.222	0.16	5.13104e-11	NK_c04-IFNG	GIMAP6
4.13539e-15	0.352894	0.216	0.157	5.7027e-11	NK_c04-IFNG	SNHG12
4.31745e-15	0.26956	0.292	0.227	5.95376e-11	NK_c04-IFNG	RAB11FIP1
6.0966e-15	0.251279	0.502	0.463	8.40722e-11	NK_c04-IFNG	CUTA
9.04502e-15	0.3082	0.591	0.57	1.24731e-10	NK_c04-IFNG	ID2
3.44082e-14	0.255932	0.242	0.179	4.7449e-10	NK_c04-IFNG	PIM2
7.47197e-14	0.285944	0.533	0.499	1.03039e-09	NK_c04-IFNG	DYNLL1
7.88999e-14	0.250352	0.352	0.296	1.08803e-09	NK_c04-IFNG	CLK1
1.44425e-13	0.456931	0.478	0.448	1.99162e-09	NK_c04-IFNG	SAT1
2.50351e-12	0.370277	0.314	0.262	3.45234e-08	NK_c04-IFNG	EIF4A3
1.47546e-09	0.37132	0.527	0.503	2.03467e-05	NK_c04-IFNG	DNAJA1
1.66106e-09	0.268379	0.243	0.2	2.2906e-05	NK_c04-IFNG	MRPL18
5.87376e-09	0.27085	0.307	0.266	8.09992e-05	NK_c04-IFNG	SLC38A2
2.82819e-08	0.31519	0.257	0.218	0.000390008	NK_c04-IFNG	ODC1
4.18398e-07	0.266612	0.11	0.079	0.00576971	NK_c04-IFNG	TMEM107
5.9068e-07	0.279004	0.472	0.631	0.00814548	NK_c04-IFNG	TSC22D3
5.09059e-06	0.264182	0.356	0.339	0.0701993	NK_c04-IFNG	AC004687.1
3.1755e-05	0.405954	0.657	0.723	0.437902	NK_c04-IFNG	ZFP36
0.000104014	0.397147	0.344	0.323	1	NK_c04-IFNG	AREG
0.000128741	0.291836	0.205	0.18	1	NK_c04-IFNG	MARCKSL1
0.0001679	0.25459	0.309	0.293	1	NK_c04-IFNG	CACYBP
0.00492294	0.27091	0.884	0.912	1	NK_c04-IFNG	UBC
0	1.26172	0.817	0.306	0	NK_c05-ITGAX	SYNE1
0	1.20584	0.754	0.283	0	NK_c05-ITGAX	RIPOR2
0	1.18331	0.778	0.341	0	NK_c05-ITGAX	SYNE2
0	1.1155	0.575	0.13	0	NK_c05-ITGAX	PARP15
0	1.07348	1	0.999	0	NK_c05-ITGAX	MALAT1
0	0.996467	0.46	0.097	0	NK_c05-ITGAX	VCL
0	0.934499	0.994	0.909	0	NK_c05-ITGAX	PTPRC
2.80214e-307	1.06598	0.685	0.256	3.86415e-303	NK_c05-ITGAX	IGF2R
2.25283e-306	1.10373	0.812	0.376	3.10665e-302	NK_c05-ITGAX	AHNAK
2.85999e-300	0.626317	0.174	0.016	3.94393e-296	NK_c05-ITGAX	S100A9
5.02778e-292	1.21379	0.83	0.446	6.93331e-288	NK_c05-ITGAX	NEAT1
2.64555e-290	1.04833	0.804	0.406	3.64821e-286	NK_c05-ITGAX	DDX17
3.70008e-283	1.03469	0.728	0.31	5.10241e-279	NK_c05-ITGAX	ATM
6.67458e-271	0.881397	0.957	0.582	9.20424e-267	NK_c05-ITGAX	TXNIP
3.38288e-267	1.04023	0.781	0.37	4.665e-263	NK_c05-ITGAX	CX3CR1
1.71003e-265	0.950714	0.618	0.224	2.35813e-261	NK_c05-ITGAX	ARHGEF3
3.17848e-262	0.982712	0.7	0.292	4.38312e-258	NK_c05-ITGAX	PTGDR
5.66602e-261	0.996488	0.646	0.254	7.81344e-257	NK_c05-ITGAX	TGFBR3
1.02771e-259	0.639825	0.18	0.02	1.41722e-255	NK_c05-ITGAX	LYZ
7.83845e-257	0.724669	0.3	0.055	1.08092e-252	NK_c05-ITGAX	PPM1L
2.16187e-251	0.832822	0.412	0.103	2.98122e-247	NK_c05-ITGAX	RAP1GAP2
9.06588e-250	0.926859	0.593	0.213	1.25019e-245	NK_c05-ITGAX	CCDC88C
3.83166e-249	0.934396	0.872	0.568	5.28387e-245	NK_c05-ITGAX	RNF213
4.8537e-249	0.966086	0.721	0.336	6.69326e-245	NK_c05-ITGAX	UTRN
1.00623e-247	0.800515	0.389	0.093	1.38758e-243	NK_c05-ITGAX	AL390728.5
2.6845e-247	0.989756	0.817	0.457	3.70193e-243	NK_c05-ITGAX	ZEB2
2.76053e-245	0.617463	0.161	0.017	3.80677e-241	NK_c05-ITGAX	S100A8
2.04991e-241	0.990299	0.624	0.248	2.82682e-237	NK_c05-ITGAX	STK38
3.39384e-232	0.769672	0.357	0.083	4.6801e-228	NK_c05-ITGAX	STX16
2.45824e-228	0.925845	0.584	0.221	3.38992e-224	NK_c05-ITGAX	CEP78
2.97667e-227	0.877662	0.611	0.239	4.10483e-223	NK_c05-ITGAX	RASA3
3.96309e-225	0.903526	0.814	0.485	5.4651e-221	NK_c05-ITGAX	MBP
4.95126e-220	0.902483	0.69	0.327	6.82779e-216	NK_c05-ITGAX	LNPEP
1.55916e-219	0.955366	0.67	0.306	2.15008e-215	NK_c05-ITGAX	MACF1
9.45852e-218	0.935908	0.758	0.415	1.30433e-213	NK_c05-ITGAX	CELF2
2.08115e-217	0.876264	0.544	0.201	2.86991e-213	NK_c05-ITGAX	ADAM10
8.1662e-213	0.883586	0.588	0.234	1.12612e-208	NK_c05-ITGAX	KIAA1551
1.00249e-206	0.897183	0.573	0.226	1.38244e-202	NK_c05-ITGAX	SLFN5
6.97304e-203	0.851169	0.354	0.091	9.61583e-199	NK_c05-ITGAX	DTHD1
5.58731e-197	0.845258	0.619	0.27	7.7049e-193	NK_c05-ITGAX	IL10RA
3.99621e-195	0.797177	0.825	0.541	5.51077e-191	NK_c05-ITGAX	MBNL1
1.59383e-194	0.708142	0.923	0.765	2.19789e-190	NK_c05-ITGAX	LCP1
4.25821e-194	0.817481	0.568	0.23	5.87207e-190	NK_c05-ITGAX	SSH2
5.97555e-189	0.907837	0.702	0.365	8.24028e-185	NK_c05-ITGAX	LINC00861
2.14109e-188	0.855925	0.435	0.143	2.95256e-184	NK_c05-ITGAX	SLFN12L
6.23602e-188	0.857205	0.613	0.273	8.59947e-184	NK_c05-ITGAX	MYBL1
2.00373e-187	0.841914	0.34	0.09	2.76314e-183	NK_c05-ITGAX	HIST1H1D
2.56901e-186	0.877828	0.678	0.343	3.54266e-182	NK_c05-ITGAX	GNPTAB
9.66312e-184	0.709324	0.332	0.087	1.33254e-179	NK_c05-ITGAX	ST6GAL1
1.03896e-179	0.712285	0.351	0.097	1.43272e-175	NK_c05-ITGAX	CREBZF
5.62468e-179	0.750825	0.406	0.129	7.75644e-175	NK_c05-ITGAX	VAV3
6.33808e-179	0.82486	0.647	0.317	8.74022e-175	NK_c05-ITGAX	IKZF1
7.20236e-179	0.797152	0.789	0.495	9.93206e-175	NK_c05-ITGAX	IQGAP1
8.03075e-176	0.657483	0.318	0.082	1.10744e-171	NK_c05-ITGAX	ENPP4
1.06091e-173	0.748318	0.807	0.504	1.46299e-169	NK_c05-ITGAX	PLEK
2.20861e-173	0.750083	0.483	0.177	3.04568e-169	NK_c05-ITGAX	ARHGAP25
2.59136e-173	0.759331	0.418	0.137	3.57349e-169	NK_c05-ITGAX	CD226
8.37812e-172	0.766408	0.754	0.45	1.15534e-167	NK_c05-ITGAX	TLN1
1.59357e-171	0.760474	0.321	0.086	2.19753e-167	NK_c05-ITGAX	ITGAX
1.61599e-171	0.599321	0.269	0.062	2.22844e-167	NK_c05-ITGAX	SLCO4C1
9.4654e-170	0.681554	0.916	0.627	1.30528e-165	NK_c05-ITGAX	FCGR3A
2.20952e-168	0.752874	0.513	0.203	3.04692e-164	NK_c05-ITGAX	TGFBR2
1.58908e-166	0.692636	0.337	0.095	2.19135e-162	NK_c05-ITGAX	PHC3
4.75013e-164	0.80372	0.515	0.214	6.55042e-160	NK_c05-ITGAX	PTBP3
5.27503e-164	0.774259	0.755	0.454	7.27427e-160	NK_c05-ITGAX	RSRP1
8.40958e-164	0.762365	0.464	0.17	1.15968e-159	NK_c05-ITGAX	SLC20A1
1.63898e-162	0.644516	0.287	0.073	2.26015e-158	NK_c05-ITGAX	ZNF708
2.77848e-162	0.775519	0.708	0.389	3.83153e-158	NK_c05-ITGAX	PYHIN1
1.01158e-158	0.754947	0.485	0.192	1.39497e-154	NK_c05-ITGAX	CASP8
2.48126e-157	0.746456	0.488	0.193	3.42166e-153	NK_c05-ITGAX	BTN3A1
1.08146e-156	0.37234	0.127	0.016	1.49134e-152	NK_c05-ITGAX	TRIM73
1.76549e-155	0.580034	0.273	0.068	2.43461e-151	NK_c05-ITGAX	DENND6A
8.1484e-155	0.757711	0.436	0.161	1.12366e-150	NK_c05-ITGAX	AGTPBP1
9.91691e-152	0.502828	0.197	0.038	1.36754e-147	NK_c05-ITGAX	FTX
2.25271e-151	0.753088	0.643	0.333	3.10648e-147	NK_c05-ITGAX	TXK
6.91308e-151	0.734622	0.545	0.244	9.53314e-147	NK_c05-ITGAX	ATP2B4
9.97025e-150	0.617414	0.278	0.071	1.3749e-145	NK_c05-ITGAX	GPR141
4.87097e-149	0.774879	0.595	0.297	6.71707e-145	NK_c05-ITGAX	ANKRD44
8.60485e-148	0.720509	0.464	0.181	1.18661e-143	NK_c05-ITGAX	NKTR
7.78957e-147	0.692663	0.493	0.203	1.07418e-142	NK_c05-ITGAX	EPB41
5.6361e-146	0.531735	0.23	0.052	7.77218e-142	NK_c05-ITGAX	AVL9
[truncated: 2,264 more rows]

## Sheet: B
p_val	avg_logFC	pct.1	pct.2	p_val_adj	cluster	gene
[truncated: 3,124 more rows]

[truncated: 2 more sheets: PlasmaB, gdT]
