# Supplementary material for: Single-cell RNA sequencing reveals intrahepatic and peripheral immune characteristics related to disease phases in HBV-infected patients
Source: HighWire-hosted journal article supplement (doi:10.1136/gutjnl-2021-325915), 2022-03-31
Supplement: gutjnl-2021-325915supp005_data_supplement.xlsx [file gutjnl-2021-325915supp005_data_supplement.xlsx]

## Sheet: signature score related genes
Table S3. Signature genes usded to define functional status in T cells and macrophages
T cells						Macrophages
naïve	exhaustion	cytotoxic	inflammatory	effector	regulatory	Kupffer score	MoMF score	phagocytosis	proinflammatory	GO: Regulation of T cell activation
CCR7	HAVCR2	PRF1	IRF1	GZMA	TNFRSF9	CD68	CD14	MRC1	CSF1R	ABL1
TCF7	CXCL13	IFNG	CD8A	GZMB	FOXP3	CD163	CCR2	CD163	CX3CR1	ADA
LEF1	CCL3	GNLY	CCL2	PRF1	CTLA4	MAFB		MERTK	NOS2	ADAM8
SELL	SIRPG	NKG7	CCL3	EOMES	CCR8	VSIG4		C1QB	TNFA	ADORA2A
	IFNG	GZMB	CCL4	IFNG	ADORA2A	MARCO			IL1B	AGER
	TIGIT	GZMA	CXCL9	TNF	REL				IL6	AGER
	GZMB	GZMH	CXCL10	CXCL9	TGFB1					AIF1
	PDCD1	KLRK1	ICOS	CXCL10	HELIOS					AKT1
	PARK7	KLRB1	GZMK	CD8A						ANXA1
	TNFRSF9	KLRD1	HLA-DMA	CD4						ARG1
	ACP5	CTSW	HLA-DMB	FOXP3						ARG1
	CTLA4	CST7	HLA-DOA	ICOS						ARG2
	RBPJ		HLA-DOB	CTLA4						RHOA
	MIR155									BAD
	CXCR6									BCL6
	CD27									BCL6
	FKBP1A									CEACAM1
	BST2									PRDM1
	TPI1									BMP4
	MIR155HG									CAMK4
	PTTG1									CASP3
	CD63									CAV1
	SAMSN1									RUNX1
	RGS1									RUNX1
	CD27-AS1									RUNX3
	ITGAE									CBFB
	MIR4632									CBFB
	HLA-DRA									CD1D
	IGFLR1									CD2
	KRT86									CD3E
	ENTPD1									CD3E
	DUSP4									CD4
	SIT1									CD4
	TOX									CD6
	PHLDA1									CD27
	CCND2									CD28
	GPR25									CD28
	LAYN									CD28
	PRDX5									CD80
	SARDH									CD80
	FASLG									CD86
	MIR3917									CD86
	ANXA5									TNFSF8
	CTSD									CD40LG
	PDIA6									CD40LG
	RANBP1									CD47
	FKBP1A-SDCBP2									CD70
	COTL1									CD74
	TNFRSF1B									CD81
	IDH2									CDC42
	CD38									CEBPB
	CD82									CLC
	LAG3									CLPTM1
	MIR497HG									CCR7
	APOBEC3C									MAP3K8
	ITM2A									CR1
	COX5A									CSK
	IFI35									CTLA4
	NDFIP2									CTLA4
	TNFRSF18									CTLA4
	KRT81									CTNNB1
	DNPH1									CYLD
	RGS2									CD55
	HMGN1									DLG1
	DYNLL1									DPP4
	SNRPB									DTX1
	STRA13									DUSP3
	SYNGR2									EFNB1
	RAB27A									EFNB2
	PSMC3									EFNB3
	GALM									EGR3
	FABP5									EPO
	UBE2L6									ERBB2
	MYO7A									FANCA
	PRDX3									FANCD2
	DDIT4									FCGR2B
	STMN1									FGL1
	CDK2AP2									FOXJ1
	VCAM1									FOXJ1
	SNAP47									FLOT2
	PSMB3									FYN
	ISG15									LRRC32
	HLA-DRB5									GATA3
	CKS2									GATA3
	TNIP3									KAT2A
	CD7									GLI2
	PSMD4									GLI3
	ATP6V1C2									GNRH1
	PSMD8									GRB2
	HLA-DRB6									GSN
										NCKAP1L
										HFE
										HLA-DMB
										HLA-DOA
										HLA-DPA1
										HLA-DPB1
										HLA-E
										HLA-G
										HLA-G
										HLX
										HMGB1
										HMGB1
										HES1
										HSPD1
										HSPD1
										IFNA2
										IFNB1
										IFNG
										IFNG
										IGF1
										IGF2
										IGFBP2
										IHH
										IL1B
										IL2
										IL2
										IL2
										IL2RA
										IL2RA
										IL4
										IL4
										IL4R
										IL6
										IL6ST
										IL7
										IL7R
										IL10
										IL12A
										IL12A
										IL12B
										IL12B
										IL12B
										IL12RB1
										IL12RB1
										IL15
										IL18
										IL18
										IDO1
										IRF1
										IRF4
										ITPKB
										JAK3
										LAG3
										LCK
										LCK
										LEP
										LGALS1
										LGALS3
										LGALS3
										LGALS9
										LGALS9
										LMO1
										LYN
										SMAD7
										CD46
										MDK
										MDK
										MYB
										NCK1
										NFATC2
										PNP
										PAK1
										PAK2
										PAK3
										PAWR
										PDCD1
										PDPK1
										PIK3CA
										PIK3R1
										PRKAR1A
										PRKCQ
										PRKCQ
										PRKCZ
										PRNP
										PTPN2
										PTPN6
										PTPN6
										PTPN11
										PTPRC
										PTPRC
										RAC1
										RAC2
										RAG1
										RARA
										RPS3
										CCL2
										CCL5
										CCL19
										CCL21
										XCL1
										XCL1
										SDC4
										SFTPD
										SHH
										SHH
										SOD1
										SOS1
										SPN
										SPTA1
										SRC
										STAT5B
										SYK
										ZEB1
										PRDX2
										TFRC
										TGFB1
										TGFBR2
										TGFBR2
										THY1
										TNFRSF1B
										TRAF6
										TNFSF4
										SCGB1A1
										VAV1
										VCAM1
										XBP1
										YES1
										ZAP70
										ZAP70
										ZBTB16
										ZP3
										MAD1L1
										NCK2
										FOXN1
										AP3B1
										TNFSF11
										SOCS1
										SOCS1
										PDE5A
										TNFSF14
										TNFSF9
										TNFRSF14
										TNFRSF14
										RIPK2
										FADD
										TNFRSF18
										IL1RL2
										VNN1
										BCL10
										AP3D1
										TNFSF18
										SART1
										DNAJA3
										DLG5
										SOCS6
										CD83
										GRAP2
										MAPK8IP1
										SOX13
										SOCS5
										RIPOR2
										TESPA1
										RASGRP1
										EBI3
										LILRB2
										LILRB2
										BTN2A2
										BTN2A2
										GPNMB
										GPNMB
										TNFSF13B
										HSPH1
										LILRB1
										MALT1
										SPINK5
										LILRB4
										RIPK3
										CD160
										GLMN
										HHLA2
										CORO1A
										DUSP10
										TREX1
										CD300A
										VSIG4
										ZBTB1
										KLRK1
										TMEM131L
										ICOSLG
										PTPN22
										LAT
										PRELID1
										SIT1
										TNFRSF21
										DROSHA
										PYCARD
										PYCARD
										CD274
										CD274
										CD274
										ICOS
										TBX21
										CD209
										FOXP3
										FOXP3
										FOXP3
										FOXP3
										FOXP3
										ZBTB7B
										ZBTB7B
										IL23A
										IL23A
										IL23A
										FAM49B
										IL20RB
										SASH3
										RC3H2
										LAX1
										SIRPG
										PAG1
										METTL3
										CYP26B1
										DUSP22
										TWSG1
										PELI1
										ZMIZ1
										SH3RF1
										ZP4
										SLC46A2
										SELENOK
										IL21
										VSIR
										NOD2
										NFKBIZ
										MARCH7
										RASAL3
										NKAP
										VTCN1
										VTCN1
										ZC3H12A
										PDCD1LG2
										PDCD1LG2
										CD276
										DOCK8
										ITCH
										CARD11
										CARD11
										ZC3H8
										LOXL3
										NFKBID
										NFKBID
										HAVCR2
										HAVCR2
										NLRP3
										NLRP3
										CGAS
										TNFRSF13C
										TMIGD2
										PIK3R6
										RC3H1
										IL23R
										IL23R
										BTLA
										CLECL1
										TIGIT
										TIGIT
										IL27
										IL27
										ZNF683
										IFNL1
										CCDC88B
										CLEC4G
										MIR155
										MIR155
										MIR21
										MIR21
										MIR27A
										MIR30B
										NRARP
										TARM1
										CCR2
										CD24
										KLRC4-KLRK1
