# Supplementary material for: Single-cell RNA sequencing reveals intrahepatic and peripheral immune characteristics related to disease phases in HBV-infected patients
Source: HighWire-hosted journal article supplement (doi:10.1136/gutjnl-2021-325915), 2022-03-31
Supplement: gutjnl-2021-325915supp008_data_supplement.xlsx [file gutjnl-2021-325915supp008_data_supplement.xlsx]

## Sheet: Sheet1
subCluster	Cor	Pval
B_c01-IGHD	-0.0361037	0.87009
B_c02-STX16	0.236271	0.289781
B_c03-CD1C	-0.296743	0.191472
B_c04-COCH	-0.277883	0.199203
B_c05-TCL1A	-0.13903	0.526953
B_c06-CD70	-0.2771	0.200525
B_c07-FCRL5	-0.347484	0.144923
CD4T_c01-LEF1	-0.107629	0.624977
CD4T_c02-ANXA2	-0.0826105	0.707859
CD4T_c03-GNLY	0.0750376	0.733646
CD4T_c04-FOXP3	-0.158573	0.480912
CD4T_c05-CCR7	-0.340686	0.120777
CD4T_c06-IFI44L	-0.304367	0.205171
CD4T_c07-TIMP1	-0.349696	0.101908
CD4T_c08-GZMK	-0.225289	0.301341
CD4T_c09-CTLA4	-0.21058	0.334814
CD4T_c10-CXCL13	-0.216237	0.321688
CD8T_c01-LEF1	-0.201175	0.369322
CD8T_c02-SELL	-0.0985893	0.654483
CD8T_c03-CX3CR1	0.473077	0.022615
CD8T_c04-GZMK-SIRPG	-0.0588418	0.789708
CD8T_c05-GZMK-GPR183	0.0306345	0.895128
CD8T_c06-GZMK-IFNG	-0.393192	0.0634406
CD8T_c07-GZMK-PDCD1	-0.385147	0.0767164
CD8T_c08-LAYN	-0.133083	0.554914
CD8T_c09-ACTN1	0.658171	0.00298322
CD8T_c10-BACH2	-0.334712	0.13805
CD8T_c11-SLC4A10	-0.0292446	0.894622
CD8T_c12-MKI67	0.766144	5.137e-05
cDC1	0.1065	0.628633
cDC2-CLEC10A	0.254198	0.241818
cDC2-LAMP3	NA	NA
cDC2-MKI67	NA	NA
g9d2T-c01-CD27	0.186108	0.395196
g9d2T-c02-IFNG	-0.331897	0.121816
g9d2T-c03-ZNF683	-0.0544614	0.809777
g9d2T-c04-HAVCR2	-0.217612	0.401459
gd1T-c01-TRGV2-LEF1	-0.230523	0.328172
gd1T-c02-TRGV2-PDCD1	-0.0867901	0.708348
gd1T-c03-CXCR3	-0.201333	0.356948
gd1T-c04-CX3CR1	-0.100494	0.64822
gd1T-c05-TRGV9	-0.24214	0.290275
macro_c01-C1QC	-0.146894	0.548441
macro_c02-NLRP3	-0.244896	0.298042
macro_c03-FCGR3A	0.206652	0.382031
megakaryocyte	-0.167705	0.519979
mono_c01-CD14	-0.200732	0.370401
mono_c02-FCGR3A	-0.205732	0.370959
NK_c01-GZMK	-0.260175	0.242253
NK_c02-KLRC2	0.387602	0.0676392
NK_c03-PTGDS	0.413129	0.0500722
NK_c04-IFNG	-0.114523	0.602838
NK_c05-ITGAX	0.311268	0.181591
NK_c06-SELL	-0.398322	0.0737076
NK_c07-MKI67	0.411717	0.05094
pDC	0.0827691	0.721329
plasmaB_c01-SDC1	0.0575031	0.794392
plasmaB_c02-CD52	-0.00756756	0.972663
plasmaB_c03-MKI67	0.737571	0.000206218
