# Supplementary material for: Single-cell RNA sequencing reveals intrahepatic and peripheral immune characteristics related to disease phases in HBV-infected patients
Source: HighWire-hosted journal article supplement (doi:10.1136/gutjnl-2021-325915), 2022-03-31
Supplement: gutjnl-2021-325915supp009_data_supplement.xlsx [file gutjnl-2021-325915supp009_data_supplement.xlsx]

## Sheet: Sheet1
Antibodies used in spectral flow cytometry experiments in Fig. S6b-c.
Marker	Flurophore	Clone	Manufacturer	Cataloge no
True-Stain Monocyte Blocker	―	―	Biolegend	426102
Human TruStain FcX™	―	―	Biolegend	422302
LIVE DEAD	Blue	―	Thermo	L34962
CCR7	APC-CY7	G043H7	Biolegend	353212
CXCR3	BV650	G025H7	Biolegend	353730
CCR4	BUV615	1G1	BD	613000
CXCR5	BV750	J252D4	Biolegend	356942
CCR6	BV711	G034E3	Biolegend	353436
CCR10	PE-Cy7	1300000000000	Biolegend	362108
CD45	PerCP	2D1	Biolegend	368506
CD3	BUV395	SK7	BD	564001
CD4	BUV496	SK3	BD	612936
CD8	BUV805	SKI	BD	612889
CD45RA	BUV563	HI100	BD	612926
CD27	BV570	323	Biolegend	302825
CD127	PE/Fire™ 640	A019D5	Biolegend	351364
KLRG1	APC	14C2A07	Biolegend	368606
CD95	PE-Cy5	DX2	Biolegend	305610
CD31	BV510	WM59	BD	563454
CD69	BUV737	FN50	BD	612817
CD38	APC-Fire 810	HIT2	Biolegend	303550
H LA-DR	percp-cy5.5	L243	Biolegend	307630
CD39	BUV661	TU66	BD	749967
PD-1	BV480	EH12.1	BD	566112
TIM-3	BB515	7D3	BD	565568
LAG-3	APC-R700	T47-530	BD	565774
Granulysin	AF488	RBI	BD	558254
granzyme B	eFluor 450	N4TL33	Thermo	48-8896-42
Perforin	PerCP-eFluor 710	46-9994-42	Thermo	46-9994-42
EOMES	eFluor660	WD1928	Thermo	50-4877-42
Ki67	PE-CY5.5	35-5699-42	Thermo	35-5699-42
T-bet	BV785	4B10	Biolegend	644835
TCF1	PE	7F11A10	Biolegend	655208
Antibodies used in flow cytometric validation in Fig. 6c.
Marker	Flurophore	Clone	Manufacturer	Cataloge no
CD3	APC-Cy7	SK7	Biolegend	344818
CD8	percp	SK1	Biolegend	344708
CX3CR1	PE	2A9-1	Biolegend	341604
CD45RA	BV510	HI100	Biolegend	304142
CD27	PE-Cy7	O323	Biolegend	302838
Granulysin	AF488	RB1	RUO	558254
